# Supplementary material
Source: publisher figshare collection journal article supplement (https://gsajournals.figshare.com/ndownloader/files/39471364)
Supplement: Supplementary file 1 [file 39471364]

>oenMel1-11#LTR/Unknown
TGTTGCCATTTGATTAAATAAACCGTATTAAGATAGTAGTAAACCTTAAT
AGTTGACATTAGTTGACATAAGTAGTAGTAGTTATGCTAAGGCTTGATAG
GCCGCATTTAACCTGTAGATGAACTNTTATAGCCGATTTCGNAATGTAAG
CAGTGTAGTTAAGAAATAATTACTTATCTTAAGGAGTGTATCCATTTATC
TAGAGAATGTACCTTTTGGCAGAAATTTAAATGTCAGAAAGATTATGGTA
CCAGGTATCGAGAATGAAGCAAGAATTTGTTACGATGAAGAAATCATGTA
AAGAAACATATAAAAACCCTGTAAATTTTCTGTGAGATGGGGCTCTGTCT
TTGGACGCTAGTCCACAGGCTCCCGGGCCCTCAATAAAGCACCGCATAAA
CGACTTCGGTTGTTTGTGTTTTCTTCGGATCGGGCAACA
>oenMel1-103#LTR/Unknown
TTGTAGCATCTCCAGTTTGGGTGTGTTTAGGTCCATTTGGGTGTTTTTCG
GGAAAACCAGGCACTTTCAGGGTTGACTTTCCGGCCATCAGGGATTGAAG
GGTGATTTTGGGCAAGTTGTGTGGTTTTTTTATCAGTTTGGGAAACTGTA
GACCTCTTGGTTAGATTTTAAGCCCATTTGGCTGATTTTAGGCCAAACCA
TGTGAGGATATAGGGTGGCTTTATGGGCCTTTGTCTGTTTTTAAGCTAAA
CCTTATCAATTTTAGGATGAATTTTAGGCCTCTGTTGG
>oenMel1-109#LTR/ERVL
TGTTGGTTTCACGTGCTTGGGGGGAGGGGTGGATTCACCTCAGAGCAGGC
TCTATGAAGTTGGGAAGTGGGAGGGGCTTTCCCCTCTCTGGGAGCTTCCC
CTGTGGGCTGCTGACACCAATCAGAGAGCTGATTTGGTGATGGACAGCTC
GGGAAACTAATGAAAAGTTATTTCGTTTTCACAAATCACAGTGGATCAGG
TTTGCTGGCTCTCTTTCGGCTTCCGGTCTCCGGGGATGGTGGTCCCCAGC
TGGGGGCTCTGGCCCCGGCTCTGGGCTCGGCCTGGAGTCCGGCCCGGTGC
CCCGGCTTTGTGGGGGGGCAGGCCTGGCTCGGCACCCCGGCTCTGCTGGG
GGCCCGGCTTGGGACCCCGGCCCTGGCTTGGTGGGGGGCCCGGCCCGGCC
GCATGGTCCCGGCCCCCCCTTCTTGACTGCATGGCTCCACACGGCCCGGA
GCTCCCCTCTCTACGTGGCATGGCCAAGCAGGGGGAATCGGGGAGCCAGC
AAAGGCTTTCCCTTCCCCCACTTCCTCTCTTCGCTCTGAGAGAGAAGGCC
TCCAGCTTCCCATGCTGTTTTTTCATGATCTGGATACAATTGTAACTTCT
TTATGCCTGGATAAGATCCTCGATTTTTCTAAATTTTCCTGAATGAGAAG
AAATAAAGCCTGGAGACTTCAGAAGTCAGCGCAATGTAGATAAAGTTCCT
AGTGGGAAGAGATTGAAAAGGTGCAAACTGATAAGTAGCTGAAAACCTTT
TTTGTGGGCTAAGGGGATTGTGACTTCACTAAAATTCCTTTAAACTGTGA
AATATACTTAGGGAGGTTTGGGGTGCTTGAGAAGAAGACTTTTTTGCCTT
GGAGATTTGGAGCTCTCTCTGTTCTGGAACTGGAATAAGGACAGAGACAT
TTGATAGTGAAGGAGATGAAGAGAATCTTATTTTTCAGCAGCCTGCCTTT
AAAAAGTAATACCCCATGTGTGTAACATAACCCATTGCACAGCTCTGGAA
GGACTGTGACAATTTGGAGGAATATCTGCAATATTTTCCCAGGCGGATGT
GGATTGTGAAGGTGAAGATGCCCCCTAAGCCATCACTAAAAAGGGACTTT
TCTCTCTTAAGTAAACTGAACTGATTATTTGAATGCATCACTGACTAAAG
TGCTCTCTGTATGTTTGTTGGTAAGAAATGTTAAATGAAGGGAAGGAGGG
AACAATCTAGGGATCTTATTCTGAATTTTTTCTTGTGTTATTAATAAATC
TCTTCTCATACCTTTCTAAGTTTTAAGCCTGCCTTGTCCCTACTCCTGGG
TCCCATCTCTAAAAAAAATTAAATATATTAAGGTTGGCAAACCCAAGTCA
CACCGTAACACTA
>oenMel1-110#LTR/ERVL
AAGAATAAATCCTTCAGACAAAGTTTTCCTAAAAGATATCTATTTGATCA
ATTATAGTGGTTAGTGTTAGATGTTCTTAAAAATGTTCTTGGTTGTCTGT
TCGGTCCTTTAAGCCTTACTTTGTCTCAGTTCTTAAGTAATGTTAATTGT
TAATGTTAAGTTGTTGGCCTCACCCTGCTTTGGTTTCCAATTGTCTTAGC
CATATCCCCTTCCCCTCTCGTCAGGTAAGGCCTCCGCTGCTCCCCCAAAA
TGGCGCCTGTGACTGGGAGAGGAGTGGCGTCAGCGAAGTAAATGCAAATA
AAGAGGGACGCAAAGGATGCTGGGACACTATTCAAAGTTGAAACCCCTAA
AACAACAAGACCAAATAACATCTGGAACTGAAAATAGTGTTCCCAGGTCG
AGAAAACCAGTGGAGAAAATGAACTGGCCATCCTGAGCTGCTTCAAAGGA
GCTGGTCTCCTGACCCAT
>oenMel1-122#LTR/Unknown
AGAGAAGCCCAGAGAAGAAACAGCCTGGACTTCTGGCTTCTGCCCAGGGA
CATTTCCTAGCAAGAGCCCAGCACAGGCCTCTCTCAGCTGCTCCCTGAGG
GCCAGCCTTGCCCTCAGCCTTCCCATGGAGCATCCCTGGCTGTATCCAAT
GGCACCAGGGCCCTGCCATGCCTGCTCCAAAGGCCACGGCTGCCCCAGAG
CCCCAGGACTGCAGGAGGCCTGGCTGCCCTTGCCACCATCACTGCTCTGG
CACAGGCTGGCAGCAATTCCCAGTGTTTGACACCACACACACACACACAC
TTCTCCCTGCCCTGCTGCCCTGCAAACACGAGGGGGGATGCAGCAGCACT
GCTGCAGCTGAGCCTGAGCAACTGCACTGCAGGAAGGGAGGGCCCGGCCG
GGCCGAGCCCACCTCGGGCTCATCTCAGCTCTGAGCCTTGGGGGGCCAGC
AAAACCTTCTCAAAACCGTCCTTTCAAAACTGGAAAGAGCTTCACATGAC
ACCCCACTGCGAGTGGCAGGGTTTAATTGCTATTTTACTAACCTCAA
>oenMel1-18#LTR/ERV1
TGAGAGGAATGTTACATTTGTCTTTACAAATAAATTGTAAATCTGTTGGT
AGATAAAGTTAGCACCTAGAGATAAAAGAAACAATGGGAGGGATTACACT
GATTGGTGAATGGAAAAAGAGATTTGCCTTTACAAACAAACTGTAGGTTT
GCTGGTAAATGAAATTGGGTAACAGAAGATGAAAGAAGCAACAGGGGGGG
AAACTATGAATTCTACAAGAATTAAAAATTAAAAGGGAGGGTTATACATT
AGAGGGGAATGTCAGGTGTCAGGCGTTCCGGGAAGTCTGTGCCTCTCGAG
TACCTCAGCCAATGGGGAAAGAGAGAGGGAAAAGCGGCCGGGAAATTAGG
ATAAAAAGGGAGGCTGCGTCCTCCAAAAATTCGAGAGATCCCAGGGGAAT
GCCCCATGGCCTCTCCCTTTATTCGAATAAAGCAAAAAGGACTCCTCTGT
CTCCTTTTTGGACATAAACCTCTGGTGTTTGTGGATTAATTTTCCTTACA
>oenMel1-22#LTR/ERV1
TGTAATAAATAAGGGGCCTTTTGTTCGCCTGACAGACTTTAGACCTTGGA
GGAATATCGCCAAGACTTGTGAGGCCAGGATGTNAGTTGTTCTGCTTTGA
TCCTCTGACAGACAGACCTTGAAAAAGATATCGCTAGAACTTGTTAATNG
TTTTGCTCTGCTTGATAGGCCTTAAAGTAAAAAGCCAGAATGTGTTCTGC
TTTGCTTGCATAATCACATATTGTTTTAAGTGCCAAGAAAGGAGTCAGTG
GCTGAGGAAGACTACTCGCCCTCATCCCCCGACCACCAGAAGGCAGAAAA
AGACCCCCTAGCAACTGGAGGAGCATGCGCAGAACTACTAGAGGAGGAGC
ACGTCACCCGAAAACCTAACAGCTTAAAAGGAACAGACTAAGGGGGGGTG
GGCGCAGCAGGTGGTGGAGCGGAGACTCCCCTGCCGCCCAGCGCTGAATT
TGCTTTTGCTTTCTGTAACCAATAAATCTTTTAAATTGTTATTCGATCTT
TTATGGCCCATTGCGCTCATTTATAACA
>oenMel1-4#LTR/ERV
TTTAATTGGCGTAGCCGGCAGGATTCCCTGATACTGGAGGAGTTGGGGGT
TTTCTGTGCACTTTGTACCAGGGGAAGACCTGTGCCATTTCAGCCGCACC
CAGCCTGTCAGTACCGTAAGGACTGAACAGTGTTGGAAAGCAAGGGAGGT
GGTATTGGGTTCTTCCCGCAATCTGCACACAGACCCAGGTGGAGAATCAA
CTCCATTTCAGTTATCGGAGAATTTTTTGTAAAGGATCTCAACTGTGCAA
AAGATGGGACTTGTGTTTTTGTAGTGTATGTGTTGTTAAGCTGCTTGTTG
TAGTTGAGGAGAGAACCTCCCAGGCAGTTTTTGATCCCCTAACCCAGGCA
GGGAAGAAAGGGGATTGTCCTCAGCTAAAGGCTGGGTGTTTTCTTGTTTT
GGACCCCTAACCCAGGCAGGGAAGAAAGGGGATTGTCCTCAGCTAAAGGC
TGGGTGTTTTNTTGTTTTGGACCCCTAACCCAGGCAGGGAAGAAAGGGGA
TTGTCCTCAGCTAAAGGCTGGGTGTTTTGTTGTTTTGGACCCCTAACCCA
GGCAGGGAAGAAAGGGGATTGTCCTCAGCTAAAGGCTGGGTGTTTTCTTG
TTTTGGACCCCTAACCCAGGCAGGGAAGAAAGGGGATTGTCCTCAGCTAA
AGGCTGGGTGTTTGTTGTTTTGGACCCCTAACCCAGGCAGGGAAGAAAGG
GGATTGTCCTCAGCTAAAGGCTGGGTGTTTNTTGTTTTGGACCCCTAACC
CAGGCAGGGAAGAAAGGGGATTGTCCTCAGCTAAAGGCTGGGTGTTTTCT
TGTTTTGGACCCCTAACCCAGGCAGGGAAGAAAGGGGATTGTCCTCAGCT
AAAGGCTGGGTGTTTTCTTGTTTTGGACCCCTAACCCAGGCAGGGAAGAA
AGGGGATTGTCCTCAGCTAAAGGCTGGGTGTTTTGTTGTTTTGGACCCCT
AACCCAGGCAGGGAAGAAAGGGGATTGTCCTCAGCTAAAGGCTGGGTGTT
TGTTGTTTTGTTGTTGACTACTTGGGATTGCGAAGAGACAAGCTGTTTTG
TAACTAAGGTAGTACCTCCCAAGTAGTGTGGTCTCTTCACCCGCTCCAGG
GACGAGAAGGGAAACACAGTTTTAGCTGTGCTTTTTGTGTAATTTTTAAG
TGTGCCTCCCTGAGAGTGGTTTTAGTCCCTTCGTAAAAATGTCTGAAGAA
GATAAAAATGCTTTTTATGCTTTGCTAGCTAAGTACAAAGCCAGACCCTC
CCAAGGGGGAGAAGATTGGGCATACAGTAACTGGTTTAATTTAGAAAATG
TGATTGATAGGATACATTCTTTGCAACATGAAACAAAATTCAAACTGGGC
AAAAATAAGACCATTCTCTGCTCAGTTTTGGGGGCCTGTCTTACGGCAGC
TATAGAAACTCGCTTTACGCGAAGAAGTGAAGAAAGAGCAATTATTGACT
CCCTACAAAATTTAGTGGAAATTTTGCAAAAACAATTAGATGAAGAAAGG
AATGACAATCACGCTTTGAGAGATGAGATTCATTCTTTAAGAGATGAGAA
TCATTCTTTAAGAGCTGCCCTAAGACAAGAACACACCAACACTTTAAAAC
ACACTGATTTACCAAAAGAAACAGAAGAAAAGGAAATTAATCTATTATAT
CCTCAAAAAGAACTGACTCTGATGAAAAATAGTGGGGAATATTGCTGCCC
TAGCTTGAGACCTTTGGTTAAAACAGAATACAGTTTTATCAATGATGAGA
ATTTTGACCCACAAATAACCACTACAAAAATCCTGTACACTGCTACTAAA
TTATCAGAAGAAGCAGCTAGTGGGTACTGGGGACATGGGACTTTCTTAAC
AACAGAAGTCAAACGTAACTTATGGTCCCCAACTCAGCGTGCAGTTTATT
GGGCAGCAGGGCTTAACCCTTTGGAAAGGGGAGACCTTGTAGCTTTAGTT
GGTACTCCCGACCAACTCCTAGAAAACATTCAAAAAGCTGCCTGCTTGCA
AATTATACGTGAAATAAAACTCACTGCTGGCTATAAATCACCTATGCAAT
TACCTGTAAATGTAAAACAATACCCTCCTCCTTCTGGTGCCAAAGAAGGG
CTCAAACCGGTTATACAGGACTTGCAAAACTCCCCTGTATGGCCAAACCA
AAAACCCAAACCTGACAATAGGGCTGTTTGTCAATATACTGATGATACCC
TTGTGGGAAGAAATGAAATAGAAGTAGTGGGGGATACCCAACAAAAAATA
ATCTCCCATTTGGAAAGCCCTAACTTGCAAATTGCCTCAGAGAAAATGCA
AACACCTTCTCAGGAAGTGAAGTTTTTGAAGACAGCCACTACTGGGACTG
CCCCCCCTGACGGGGTGGCCCAGAAATTCTCAGTAACAGAAGGAACTGTA
AAAAATCTGGCAATAACAGAAACTGAGAGCTTGGGTAGCAGCTACGACAA
ACCTGCCTCGGTAATTAAAGTAGCCTCTGCTCTCTCCCCCAAACAATTTT
TGTTCACTAATTTTTTGTTCACTAATGTTGTTTCTGCAGAACAAATTATT
GCTGGGGGACGGGGTGGCTCTTGGGTTGGGTTGCTGATGGTTATTTGGAA
TGTTTTCCAGCTTGAAGCGCGGAGTGCCTCCTTTGTCTGCAACTACACTG
ACTCTTATCCTGTGTTTAAAGGAGGTACAGAGTGGCTCCCTTTTTNGCAG
CAAATTATTGGGAAGTTAACAGAATTCCAGTCTGCATTACATGCTGAATA
GTTCCATCATTTTAACCTCCTGCCTCTTTGTGGCAGATTCTGTTGTGTTT
ACTTTTCACAGAATAATACCACGGAACATGAAGATTAATTGCTGAATCCC
TCATCAAACCTGTATACAGTTACAGCACAGGACCTTACAGCTGTGTTATA
TTTTGTGAAGATTCAAAATCAAAATTGAACTGTTGTACAATTTTCCTATG
AAATTATGTGTGGTAAAAACAATATAAAATACTGAGGGGAACTTGATGTT
AATGTTATAACACCTACTACCCAACCACCGGTTATACTGAGCCTGAAAAT
CTTTAAAATTGGATCTTAGGTAATTTGGTAAAACTGGCCAACAACAAATA
TTGCTTAATTCGGCATGGTCTTTTAAACAAGTCAAATTGCCAATGCAAGA
CCAGGAGGATCCTTTCAAGAAACAAACAAGAGACATAACCGGTGTTGTGG
GAACAAGATTGGGAATTTTGAATAGTATTGATTTAGAAGTATTAATGAAT
AAACATTTCTTTAGCTCTCTGCTGTATCCAGGTTCAATTGTGGATGCAGT
CAGTTGCTGCCTCAATTATACGAGAAGTGGAGGAAACCACTTTTCCTACT
GAAATTCGGAGAATAATTTGGAATAATGTTCATGATTTCGAAAAAGAATT
CCAATCCTAGTGAAACTACTACCCTAGCATAAGCACAGCAACAGCCTTTG
CACTGACCATATGTAATGTTTCAGTACATTCAATATTCCCTATCATTGCA
TTAGGGCTAAATCATGACGGAGCTATTCTCTATCCTTTCGAGCATAGAGA
ATGGGCCCGTCAAATCGGTGAGAAATGGCAAACTGTTAATTTGGAATCTT
GCGTTGTTCGGGAGCAACAGGCGTTTCATTTGTGAAAGCAATGCTATCGT
GGCCCAAGACATCTGTTTAGACACAGAGCAAAACGTCTGTCATTTTGAAA
TACATCTTGATGAAACTCCTGCAACGGTGCTGGTGTACATAGGTAATGGA
TGTGCGTGCGTAAGAACTGCTTGTAACTTAGTGTTTGTAGAAAATGTAGC
AGTGAATGTAAAAAAGAATCATTCGAATTTTTGTGTTTGTATGATTGGTA
TTATTNGTTTTANTAATGTTAAGTTTTTGTTTGAAAATGGTTTTAGAANA
ACAATTGCTTTAATCGATTNTGTTAAACGTATTATAATCNATTGATTGAT
TTGCTTTAATATTAATTGTTTGGAAGTTATTTTATTGATTGATTTATTGC
TTTAAGTTTTCAAATAATTGTTTGAAAGTTATTTTTCGATTTGTATTAAT
TTTGATTGTTTGAAAAAATTGTTTTTCAATTTGTCATGATTTTGATTTGT
TTGAAAAATTGTTTTTCAATTTGCTGTGAAAATTGNTTTTCAATCAATTT
CTTGTGATTATTTTAATTTATTAATTTTGTGTCTATTTCTTTCCTTTTCC
TTACCTCTTTCCCTCTTATCCCTAATTTTTCTGTCCCTGTTTTCCGGGAT
ATGCTACCAATGACGGGTCCTGAAGATGCTACATCGTCACAACATCACGC
TGCTGGAGATCCTCAGCGACGCTCGTTGGTCACGGGGTGG
>oenMel1-36#LTR/ERVK
TGTGGAGAGTATTGTTCAAACTTGGTTAGCTGAGAGAGGACATAGTCAAG
CAGAGTTACTGCAGATGGTCTAAGTAGAGCAAAGGCTAGCCCAGGGACAA
AGGTCCTTGTGACAAGGGGGTTGTGCTGACAATGCTTATCGCAGCAAGAA
AAAACAGAACTAAAACAGAACTAAAAACCGCAGACATATAACAGCAAACC
ACAGAAATATAGAAGTAGTTAAAAACAGAATATTGCAAAAACTAACTTAT
GCAAGATGAAGATAACCAATAATGAGCTTGGCTTTTGTAATATGTATGAA
GCTAATTAAGAAGTGTATAAAAGCAGAACTGTTTTATCAATAAATCGGAG
TCTTGCTGATAACCACCTGGTGTCCGCAATCTCACTTTCACCGACAT
>oenMel1-41#LTR/ERVK
TTTGGCGTCCTCTGGATGGGCTGCAGCCTACAAAGGTGGGTGCGGACCCC
TGGACCCTGAAAACCCAGCTCGAGAAGATGCACACAGCTGGAGGAGACCC
CCTCAGGCAGAGACATTTGACTACCTGGCTGGTCCTTGTAGCCTGCAAAG
GCAGGTACAGACCTCCAGAAGACCGAGCTTCAGAAGAGGCACGCCGTTGA
AAAGGACTGCGGAGGAGATTTTTGGCCCTCTGCCAAGAAAAGCCGAGGTC
CAGACGCGCGTCGGAGAGGAGGTGTCCCGGGAAGCCTCGCTCCTGTGCAC
TGCTGGTCAGTTTCAGGAACCTCCGAATCGATTTTGGACAAATTGCTTTT
GGGTAAGACGGTTCAGATTCAGATACATCATAGGAACAATATAGGCAGAA
CTCTCAGCCAGGAACAGCTCACTTTACCATCCATTTTGAAAGTTTTAGCT
TTTGTTCATCCTGTCTCTGTCACAGTGAAGGAATTCTGAGATTTTTTTGT
GTGGGTGAAGCTTCATTACCCACAGGCAGAAACAAATGTACTATTTACAG
CAGGATTCTGGCAAAAAGTTAATTGTAATTGATATAAGTCTGTAACTCTG
AAAGATAAGGGAGTGAAGGACTCCCGAAAGTGTAGCTTTATCCAGTCTCT
CCTTGGCAGAAAGCAATTAAAGTCCCTCAGAGACTGGGGAAGGATTCTCA
CCTAGCTATGAGCTGGGGGAGGGAAGTTTATGGCTGCCGTGCCAGCAGCA
GTGGGTTCAGCAAAGGATTTTTTAACGGTAGCACAAGTTATGTTAGAGGC
ATTGTCTGCTGAAAAAATAAAGGTTTCTAGTCCTCTGAAGGCCATAGAGG
GTCTCTCAGGACTTGAAAAGAGGACATCCAGCCAGCAGCTGGTGTCTACA
CAAACTGTCTGCCAGCAGCAGACCAGTTCGTCTTCGGACATCCTAGATTC
CTCAGATTCACCCAAATTCCTAGAATTACCTGAACCTACCCCTAAATCGG
GAAAAATCAGAATGGAGGTTTTTCCAAAGAATTTTGACGATTTAGACTTT
TGTTTTTTCAATCCCTCAAAAATGACCTCACCACCAGCAGGGAGGCAATT
GCATTCTACCCAGGGAGCGGTGGGGGGATCAAGGGAGGGAGATGAAATGG
GACACACGATACCTTATACTTCTACAATGCTAGAACAGACAATTCGTGGT
GCTGCGGGAATACACAGAGTAACTGCAACGCCATCGGGATTTCAGATCAG
GGACACTTTACGGGCTTTGACACCACTTTCGCGGAGAGGGACGCCACAGA
TCTCGGAAAGCGGGGCGGGGGGGGACAGGAACGCGTGCAGCAGTGGCGGG
GGGTGGAGATATGAGTATAGAAACCGCAGCGCGATTCATTGTCCGCGGAA
AAACCCCGTTGGTCAGTGGCGCCTCATGGGGAACCCAGGCGGAGCGACCC
CCAGGGGCGGCGGGATCGATCCCTGACGCGGCGGGCGGGGGAATTTCTCG
CGGCCGGGGGGAGGTGGCTCCGGGCGGGATCGGCGCGGCGAGATTCGCGG
GGGTGGCGCCGCCCATGCTGGGGACGGGCTGGGTCTCGGCTGCCGGCACA
GGAGCGGCGGCGGGGCCAGCCACGTCCGGGGGGGACGAGTCACACCCGGG
AGGGAGAGCAGGACAGCCCGACCCGGGAGCAGCCAGCGGCGCATGCGTGG
TTCGACCTGGGCGTGGGGAACACGCAGGCGTGGCGCCTGGAGATGCCAAC
ATCCCCGAACACGAAAGTGACAGAAACAGAACAGGGACACAGGCATCACA
GCATGCGGGCACAAAGGCCAAGATTTAGTTCACAGAGCAGTAATTCCAGC
GTGGCAGGGCCAGAAATGAGTCACCACAGGGCGGAGCCGGCCCGTGCCGG
ACGGAGGACGGGGTGCAGCAGCAGCGGCCCTGGCCCCGGCCCCGAGCAGG
AAGCGCGCGGCAAACACAAAACCCAGAAATGTCAGCGATGCAGGGAAAAC
TGTTTCAGGGAAAGACAGATTCAAAAAGGGGAAAAATTCATGCTTTGTAA
AGTCAAAAGAGAAAAATTTAACAACTTTTAAGCAATTGCAGGCAGCTGCC
CGAACAGAGCTGATTCAAAGAAAACCCAGACACAGCAGCGGGAGGTCCCC
AGCCCGGGGCTCACAGAGAGGAGGGGGAGCACCGCTGCCCCGCTCCCAAA
AAAAAAAGGCTCTGACAGTACCCCCGCTGCTCTCCCCTGCCCTGCACGGG
TCAAGTGCTGCTGAGGGGAAGAGGAATGGGGGATGGAGAGACACCAAGAC
CTGTTTTTATCTATATTGTGGAGAACAAGCAGAACGAGGGAAATTGATAA
GAGACTCAATTTTATTTTCAGTTCTTGTATGTTAAACTAAGGTGTTTGTT
TTTGCATTGTTAAAAAGATGCTGATAATTTTAAGAGTGATGAAGGTATTT
TAATAGTATTAGGTATTTTAATAATTGAAGGTATAATAAGGTATTTTGTA
TTTTATTTGAATACACATCATCTATATTTAGTGATTTGTTATTTCTCAGA
TATGAGTGTACGTTTATTTAAATGTCAACATTGAGTTTTAATTTTCCTAT
AGTTAATTGTTTCAAAGAAACCAGTTTCTAAGTATTTGCAATACTGTCAA
TATAAATCAATAGATTTCGAATTCTTATAAGAAGCTTGCAGATTTATGTT
TTGCAGATTTATGAATATTTTAGTTTTCCCTTCAAATCAAATTGCAATGG
ATTTCTAGTCTACATTTTTAAAATTATCAATGAAATGTTGTGTGAACACA
AATCAAGACCACTTCTAGGATCATCATTTGAATTGTAAAACTTAATTTAA
ATCAAAATTCTTTTCACATATATTGGAAAAGCAGTATTTATCTATCAGTT
CAATTTTTAAGATTTAAATATAATTTCTATATTTAATTTTAAAAACACTG
TAATAAGATTGTATGAATTCTGCATCACAGAATGATTTTATTTTCTGTTT
CATTGTTTAATTTGAACTCTTTCAGCATTTTAAGTAAGTTTTGGAAAGTC
TCCAGGTGTATTCTTGAATCAAATGTGTAATTAGTTAAGTTGTGAACTTA
ATGGTTTTTTGTCTTTCTTTTATTAATTCTCTCTTTTATTTTGGCAGGTC
TTTTGTGACCTGGCCCTGTGTAAGTTTTGAATATTTTGCAGAATTTCAGA
AAATTACTTGAGCTCCATTCTCAGAATGAATTTCTAGTGTTATGGTTTTT
CTGAGTTGCTATCACAGAAGCATTGCAGCAGCTTGCCATGTTCAAAGCAT
TTTACCCTAAAGAAGAATTTTAGAGAAAATGAGTTGCTAAAGGAATTTGA
TTTCTTCTTCACCTTGAAATATTTTGTATTGTAGTTTTGTTGTTAAGAAT
TGTGAGTTTTTTTTTCTTTAATAAGAAGATGTCAGGGAGTTCTCTTCCAA
TTAGAGTTTAGGCTCTGGCCAAGCCTTGATTCTAACTGAAAGAGAAAAAT
GTGTAAACCCAGGAGTTTTCTGCATCAAAATAATATTCCAGTCGTTTGGA
TTGGCAATATGACCTTGTCAGTATGACAGCTGAAGCTAACCTTGAAGTGA
ATTGGGTGTTCATTTTCCGGAGATGACCATCTGATTCCTCATTGAATCGA
GGTTTGTCAGCTGTTTGCAGACCCTGAGGTGAAGACACAGTTTTTTAAGA
GGTGATGACACAGTTTTTAAAAATTGATGATTATCTAATCTTGTAAATGT
ATGTTTGATGTTTAAGGTATTGATAATTGCTGTATTGTGTTTTGACTTCA
GAAGATTTAAACTTTGTGTTTGTTTTTTGTTAGAAAATAGTTGAAGGAAA
ATTCTCCAGTTTTGATCAAAAATCTAGAAACAAAGAAAAATTGAAAAGCT
TTCAAAATAAGTATTTGGGGGAAGGGTTCTGCTTGTGTCTCCACAGAGAG
AGGACAAAGATGAATGCCAATGAGATACGTGAGGCAATGTCCAGCCAAGA
TGCGGGCAGATGCCAGCCCTGGAAGTGAAAGGGCAAGCTCACAGATTGAA
TCAGAAACAAAGATGATGAACTTCTCTCCAGACAACTGACTTGAAAAACT
AATAAACCTCTTTAGATGGGTCAGTGGGCCTTGAAGAAGAAGAAATTGAG
TGATTTGAAGAATTTAGTCAAGATGATGATTTGCTCATTGTGGCATCCAT
GCAACAGAAGCTGCAAAAAGTTCATGACTGTCTTATCACAAAAGTGCAAA
AGGCTGGATTGGAAATTAGCACTTCAAGATTTGTGAAATTGCACACTGGA
ATTTTTCATGTTTGTTACTCTGAAGAAGACCTCTGGTTCATGGAGATTGC
TTCATGATCTCAGAAAGCTGAATGAGACTGTAAAGCCTCAGAAAATAGAA
ATCAGCTCAAAAATCAACAATTTGCAAGACCTACAACAATTTTTTGGAAA
GATAAACTGGATGAAACTGATTTTAGAAATCACAAGAGAAGACCTTTCAT
TTTATTTAATTTTCTGAAAGGAACAGCGATATCAAATTTCCTAAAACTCT
CACACCAAAAGTACGAAGAGCTTTGGAAAAGGTTGCAGAAATTTTATAGC
AGAAACAAGCACATCGTTATTTAGATTCATTGCCTTTTTGTTTAGTGGTG
TTGAGAGAAGGAACACAGTCATATGGTTTAATTTTTTAATGGGATGAGTC
TTAAAGGGACCAACTTTTAATTATAGAGTGGATTTTTCTATCTTACCAAT
TCCCGAAGACAATTTTTACAGATTTAAAAATAATAGATCATAATAAAGGG
AAAAACAAGGCTGATGACAATGACAGGCAGAGATTTTTTATAATGCATTT
ACCCATGAAAAAGCAGTGTTTTGATTTGGCACACCAAAATCACTGGATTT
GGCAATTGTATTGTTATATTATACAGGTATTTATACAATTCACTATCTGA
GTCACAGGTTGTTGAAAGCAAAATTAAAGTTCAGAGAAAAATCAAAAATG
AGTGAGGACCATTGGACGAGATCATAGTGTTCACTGATGGTTCAGGGAAA
ACTCACAAATCAGTAATTATATATCAGAATTAAATTATAGGAAAATAGGA
ATTGGATGTGGAAACAGTGCAAAATTCACCACAAATTGTGAAATTGGCAG
CAATGGTCAGAGTTTTTGAATTGTTCTAGTAACCCCTTGATTTAATTAAA
GATTCGGTGCATGTGAAAAACATAGTTAAAAGATTGGAAGGGTCACTTTT
AAAGAAAACAAGCAATGACATTCTATATTCATATTTATCATATATGAAAA
CATTGCAGAAAAACAGGACACATAAATATTCTATTACACATATTAAAGCT
CATCATTCCCAGAATTTTGGTAGAGGGAATGCATGGACAGATGGATTGAC
CATGTCTTTTGCAAACCTTGCCAGATATTTTTAAGCAGGTAAAATTAAGC
CATGCATTTTTCATCAAAATACACAAGCATTGATTGAATTTTTTCACATT
TCAAAAAAGCCAAGCAAAAGAAATTACTTAGTCCCATCGGGATTGTCAAA
TGATATAGTCGCCAGTTTTTATGGGAGCAGTCAACCCTAGGGGACTGCAA
GGTCTTCAACTGTAGCAGACGGACGTGACAAAATACTCATTTTTTGGAAA
ACTGAAAAAACATTTATATTCTAGTTGACATCATTTTATGAACAATTTTA
GAGAAAAAAAAAAGGGGGGGGAGACAGAAGCTATGCCTCATGTGATTGAA
CAAAAGTTTTATTATGTATTAAACTTCTTAAATAGTTCTTTTTTAGAGTG
AACTCCACCAATTATAAGATATTTTACAAATGATACAAGAGCAAAGCTAA
AAGAAAATCCTTTGGTTTTGATCAGAAATTTAGAAACAGGTAAAAACTGA
AGGGCCTTTCAAACTAATCATGTGGGGAAAAGATTGTGCTTGTGTTTTCA
CAGATAAAGGATTGAAGTGGATTCCTACAAAATACATGAAACCATATTGG
GCCCAAACGCAAGCAGAAGCCAATCGTGGAAGTGAGGAAAATAGTTCGCA
GACAAAATTGAAGACAAAGGATGTGAACTTATTTTCAGACAAGACATGAA
AGATTTAAGGACTGACAGTGAAACATGTTTGTTTATATGTTGTTGTATCT
TATCTTTTTATCAACTATGTTAGATAACAAAGCAGATTTATCAGTGATGC
AGCCAAGGGAGAAGGTTTGGAGAAATTTAGCAGAGACAGCGGGGTTGGAC
ACAATTTGTTTGGGACATTCCAGGCCAGGAAGGCCATTTTCAATATGTCT
GGTGGGATTGCCAGTGAGAGAATGGCCCATTCCAGAGGGCATCCCTTCAT
GGGCAATGCGAGTTGTGACAGCTCCTGTGGACGGATGGCATGTGTGGGTT
CAATTTCTCCCTGTGGCCTTTTTCAAACCAGAAGAATTAGAAATGTTTTG
CTTCAACAAGAATGGACTTCTGCATTGTATTTAATGTTTCAGGACTGACA
AAAAACCAAACAATGAATGTTACTCTGAAACAGGATGTATATAATAATTG
TATTATAGTCTCAAACAAACCATCCTTCCAAGTTTTAGCACAGTTACTGC
TGGGAACGTTTTTTGTTTGTAGGGACAAAATTTGGGCTGCTATCCCTGCC
TGCATGAACTTGTCTGATCATTCAAAATCAACTCAGAAGAACATAAGACA
GTTGCAGAAAGGTGTGGCAAAGCTTGAGAAAGTTACTAGATCAAGGATGG
ATGGTCTGTTTGACATTTTTGATCTTTTACCTTTGTAAAAAGGAATTTTG
AAAGTAGAATTTTATATATTAGTGGGGCTTGTAGTTCTTCTCGTCATTTT
GCCATGCATCATTCAGTGCATTTGTCATGCCATGGAGAAAGCTGTAAAAG
AGATGTTTTTGGTGCAAACAGAGGGGGGAGA
>oenMel1-43#LTR/ERVL
TGAAGTAAATAGTCTCAGTTAAGAAATGTTAAAAGCTGCTAGAAGAGTTA
AAGAAATTGTTGTTACCTTATTGTTTTATCCACTTGTTGGTTCACTAGTT
CTCTGGTCAAGTTGCTGTGTTGTTTTCCCCAGTTGAATGTACAGTCCCTA
TATACTTCAAACCCCAGTTTATTGTATTTCCTATCCCAGTTTCCCATTTC
CGCCCTTCCACCTACCATGTCCGCCCTTTCCCTTACCTCACTTCCGGCTT
GCTGCTGCCTGCCTATCAAGTTAAGCAACACCTTATATGTAAATCTCAAG
GAGTTACCCAGTACCAACATTACCAGAAGTCGTCTTTAAGAAGAGAATTC
ACGAGGGTAGTCAACTAACACTGAGCTCAAGTCCACAGATTACATCCACC
AACAAGCTAAGTCACCTGCAATGTGCCCTTTGTAACTGTTTAATCACCGC
GACCTCAAGAGCAGTTAAGAAGGATGACACCCCCAGACCAATGAGCCACC
AGGGAGTTCTGGACGTGCCTGTGAGGTTGGAACTCCCAGTTCTGCCCTCG
GACAGGACTGCACGAGAACCTCCTCTCCGCGTTGGATTGGCAGCAGCAGC
AGCAGGCGTCGGGCCTCCCTATGACCCCCATTAAATAAAAGAGCTGGCAT
TTAATAAAGGCTTTGGCCCGCGCCTGTTTATTTCA
>oenMel1-54#LTR/ERV1
TGAGAGGAATGTTACATTTGTCTTTACAAATAAATTGTAAATCTGTTGGT
AGATAAAGTTAGCACCTAGAGATAAAAGAAACAATGGGAGGGATTACACT
GATTGGTGAATGGAAAAAGATATTTGCCTTTACAAACAAACTGTAGGTTT
GCTGGTAAATGAAATTGGATAACAGAAGATGAAAGAAGCAAAAGCGGGGG
AAACTATGAATTCTACAAGAATTAAAAATTAAAAGGGAGGGTTATACATT
AGAGGGGAATGTCAGGTGTCAGGCGTTCCGGGAAGTCTGTGCCTCTCGAG
TACCTCAGCCAATGGGGAAAGAGAGAGGGAAAAGCGGCCGGGAAATTAGG
ATAAAAAGGGAGGCTGCGTCCTCCAAAAATTCGAGAGATCCCAGGGGAAT
GCCCCATGGCCTCTCCCTTTATTCGAATAAAGCAAAAAGGACTCCTCTGT
CTCCTTTTTGGACATAAACCTCTGGTGTTTGTGGATTAATTTTCCTTACA
>oenMel1-64#LTR/ERVL
TGAAGTAAACAGAGGAATTCAGNGGCAATGAACCGAGAGTTACAAACAGT
TACTGTTAATCCTTGTTAGAGTTGTACAAAAACAACTATGTTAATTTGTT
ACAATGAGTTGTATCCCCAGTTAAAAAGTTCTGTTACGAGTTGTTCTCAT
AGTATATACTTCCCAGTTTGATCTCAGTTCCGAGTTTGTTGAGTTCCCAA
TTACTTCCTCCTTCCGCCCTGTCCCATCATCTCATTTCCGGCCCTGCTGC
TGCACCCCCGTGCCAGTCCATCAAACTGAGAACTCTGCCCAATATGCAAA
ACTCCCAAGAGACACCTCCGCAGCAGAAGTTCCATCCAGACCAAAAATCC
CTAAAAGCAACAGAACAACACCAGCTATAGGAACGCAACTGATACAGTCC
AGAAGGCAAACCCTCAGCTACCAGAGGAAGCCCTCGTTCAACTTGCCATC
ACCTGATAAGCGGTGTAACAAAATGNCCCCCCCTAACTTGACACACCTGG
NGAGTTCTTGACGTGCTCGTGAGGTTGGAACTCCCATTCCTGCCTTCAGA
CGGGACTGCACTTGNGACCTCCTCTCCACGTTGAACTGGCTGAGCAGCAG
CAGCAGGTGTCGGCATCCCTGCGACCCCCATTCNAATAAAAGAGCTGCTT
CTTAATAAAGGCCTTGGCCCTGCGATTTTATTTACAGCA
>oenMel1-71#LTR/Unknown
TGTCGGGGCTCTGGCTGTGTTGNATGAANATGAGAGACTCTGACTTTAAG
AGAACTGCGTAATTCTCTANTGTTNGGAGAGAATACTGACAGCGAGCTAT
TCATAAAGGAGATACAAAGTAATAACAATGACTGGGTGGGAAAGAATCAG
AGTAGCAACNGTAGGCGGCTNAGAAGGTACATTAAAGTAGCAAGTAAGAA
GGTAGATGTGCAGAGAAAATATAGTAAAGTAGCAAATAGGTAGAAGAGAC
GTGACTGACTTAGGGTGCTAGATTGCTTGAGCCGAGAGGTGGAGAAATTG
CCGTAAAAACGCACGAAACCAATCAATAAATAACAAGTAATATATGGACG
ATGCTCACTAACCAATGATATGTTTGCTGGCCTTGCATGTTGCAACAATG
TTTAAGTATAAAAGAAGCGCTGTACAACTGATAAATGGATTAGACTTGCA
TCATATTGATGTGTGAGTCTTTTCTCATCTCGCCATGAAGATCCTTCCCT
AGCTANGGCTCCGACACA
>oenMel1-81#LTR/ERVL
TGTCCTGGGTCAGTGTTTTGACTGAATTCTCACCCTGCCCCCCTTGGCCA
TGAAGCTGTCTGCTCCCGGGGGAGGGGCCGCCTGGGCTCGGCTCTGTGGA
CTGGCCTTGGTTTTTTTTTTTTCCGCTCTTGCGGTGGCTCGCTTGGCTCT
GGCTGCTGCTTGCGTGTGGCTTTTCGCTGCTGTAGTAGTAGTTCGTTGCC
TGGTTTGTTAGTTAGCTGTTTTTTTCATTAATTTTTTGGCTTTACATTGC
TTGAATTATTTGTTTTAGCTCGCTGTTGTTTAAGGCTTGCTGGCTGTTTT
TTCTTTCCTTTCTCTCTCTCTCCCTCTCCCTTCCCCCCCCCCCTCACCTC
CCGAGGATCAGCACCAGCTCGCTCCGGAGGAACCCTGCGGCCTGCCTCTG
GACACCGGCCAGAGAAGCACCTCGTCCTTNTAGTAAAGATCAAATCGTCC
ACGTCTCTTTTTATCTCTCAGTAAAAATTTTTTTTTGTCATCTGAATCTG
TGCTGAGAAGTGTTTCCCTTGTATGTGTTAACAAATAGGTTTTTTCCACT
TTTCCCCCTAAGTAAAATATTTTTTCTTAAGTCCAGTGGAATAAAAAATT
GGAAGTTTATTCCCTGGAAAGCTCTTCTAGAAGTTTTTTCCCTAAGTTTG
TCCAAACTAGGACA
>oenMel1-10#LTR/ERV1
TTTAATTGGCGTAGTCGGCAGGATTCCCTGATACTGGAGGAGTTGGGGGT
TTTCTGTGCACTTTGTACCAGGGGAAGACCTGTGCCATTTCAGCCGCACC
CAGCCTGTCAGTACTGTAAGGACTGAACAGTGTTGGAAAGCAAGGGAGGT
GGTATTGGGTTCTTCCCGCAATCTGCACACAGACCCAGGTGGAGAATCAA
CTCCATTTCAGTTATCAGAGAATTTTTTGTAAAGGATCTCAACTGTGCAA
AAGATGGGACTTGTGTTTTTGATGTGTATGTGCTGTTGAGCTGCTTGTTG
TAGTTGAGGAGAGAACCTCCCAGGCAGTTTTTGATCCCCTAACCCAGGCA
GGGAAGAAAGGGGATTGTCCTCAGCTAAAGGCTGGGTGTTTTNTTGTTTT
GGACCCCTAACCCAGGCAGGGAAGAAAGGGGATTGTCCTCAGCTAAAGGC
TGGGTGTTTTCTTGTTTTGGACCCCTAACCCAGGCAGGGAAGAAAGGGGA
TTGTCCTCAGCTAAAGGCTGGGTGTTTTGTTGTTTTGTTGTTGACTACTT
GGGATCGCGAAGAGACAAGCTGTTTTGTAACTAAGGTAGTACCTCCCAAG
TAGTGTGGTCTCTTCACCCGCTCCAGGGACGAGAAGGGAAACACAGTTTT
AGCTGTGCTTTTTGTGTAATTTTAAGTGTGCCTCCCTGAGAGTGGTTTAG
TCCCTTCGTAAAAATGTCTGAAGAAGATAAAAATGCTTTTTATGCTTTGC
TAGCTAAGTATAAAGCCAGACCCTCCCAAGGGGGAGAAGATTGGGCATAC
AGTAACTGGTTTAATTTAGAAAATGTGATTGATAGGATACATTCTTTGCA
ACATGAAACAAAATTCAAACTGGGCAAGGATAATAAGACCATTCTCTGCT
CAGTTTTGGGGGCCTGTCTCACGGCAGCTATAGAAACTCGCTTTACGCGA
AGAAGTGAAGAAAGAGCAATTATTNACTCCTTACAAAATTTAGTGGAAAT
TTTGCAAAAACAATTAGATGAAGAAAGGAATGACAATCATGCTTTGAGAG
ATGAGATTCATTCTTTAAGAGATGAGAATCATTCTTTAAGAGCTGCCCTA
AGACAAGAACACACCAACACTTTAAAACACACTGATTTACCAAAAGAAAC
AGAAGAAAAAGAAACTAATCAAATATATCCTCAAAAAGAACTAACTCTGA
TGAAAAATAGTGGGGAATATTGCTGCCCTAGCTTGAGACCTTTGGTTAAA
ACAGAATACAGTTTTATCAATGATGAGAATTTTGACCCACAAATAACCAC
TACAAAAATCCTGTACACTGCTACTAAATTATCAGAAGAAGCAGCTAGTG
GNTACTGGGGACATGGGACTTTCTTAACAACAGAAGTCAAACGTAACTTA
TGGTCCCCAACTCAGCGTGCAGTTTATTGGGCAGCAGGGCTTAACCCTTT
GGAAAGGGGAGACCTTGTAGCTTTAGTTGGTACTCCCGACCAACTCCTAG
AAAACATTCAAAAAGCTGCCTGCTTGCAAATTATACGTGAAATAAAACTC
GCTGCTGGCTATAAATCACCTATGCAATTACCTGTAAATGTAAAACAATA
CCCTCCTCCTTCTGGTGCCAAAGAAGGGCTCAAACCGGTTATACAGGACT
TGCAAAACTCCCCTGTATGGCCAATCCAAAAACCCAAACCTGACAATGGG
GCTGTTTATCAATATATTGATGATACCCTTGTGGGAGGAGATAAAATAGA
AGTAGTGGGGGATACCCAACAAAAAATAATCTCCCATTTGGAAAGCCCTA
ACTTGCAAATTGCCTCAGAGAAAATTCAAAAACCTTCTCAGGAAGTGAAG
TTTTTGAAGACAGCCACTACTGGGACTGCCCCCCCTGACGGGGTGGCCCA
GAAATTCTCAGTAACAAAAGGAACTGTAAAAAATCTGGCAATAACAGAAA
CTGANAGCTTGGGTAGCAGCTATGACAAACCTGTCTCGGTAATTAAAGTA
GCCTCTGCTCTCTCCCCCAAACAATCTTTGTTCACTAATTTTTTGTTCAC
TAATGTTGTTTCTGCTGAACAAATTATTGCTGGGGGACGGGGTGGCTCTT
GGGTTGGGNTGCTGATGGTTATTTGGAATGTTTTCCAGCTTGAAGCGCGG
AGTGCCTCCTTTGTCTGCAACTACACTGACTCTTATCCTGTGTTTAAAGG
AGGTACAGAGTGGCTCCCTTTTTGGCAGCAAATTATTGGGAAGTTAACAG
AATTCCAGTCTGCATTACGTGCTGAATAGTTCCATCATTTTAACCTCCTG
CCTCTTTGTGGCAGATTCTGTTGTGTTTACTTTTCACAGAATAATACCAC
GGAACATGAAGATTAATTGCTGAATCCCTCATCGAACCTGTATACAGTTA
CAGCACAGGACCTTACAGCTGTGTTATATTTTGTGAAGATTCAAAATCAA
AATTGAACTGTTGTACAATTTTCCTATGAAATTATGTGTGGTAAAAACAA
TATAAAATACGGAGGGGAACTTGATGTTAATGTTATAACACCTACTACCC
AACCTGAAAATTTTCGAAATTGGACCTTAGGTAATTTGGAAAACTGGCCA
ACAACAAATATTGTTTAAATCGGCATGGTCTTTTAAACAAGTCAAATTGC
CAATGCAAGACCGGGAGGATCCTTTCAAGAAACAAACAAGAGACATAACC
GGTGTTGTGGGAACAAGATTGGGAATTTTGAATAGTATTGATTTAGAAGT
ATTAATGAATAAATTGGCTAACATTTCTTTAGCTCTCTGCTGTATCCAGG
TTCAATTGTGGATGCAGTCAGTTGCTGCCTCAATTATACGAGAAGTGGAG
GAAACCANTTTTCCTACTGAAATTCAGAGAATAATTTGGAATAATGTCCA
TGATTTTGAAAAGGAATTCCAATCCTGGTGAAACTACTACCCCAGCATAA
GCACAGCCACAGCCTTTGCACTGACCATATGTAATGCTTCAGTACATTCA
ATATTCCCTCTCATTGCATTAGGGCTGAATCATGACGGAGCTATTCTCTA
TCCTTTTGAGCATAGAGAATGGGCCTGTCAAATCGGTGAAAAGTAACAAA
CTATTAATTTGGAAACTTACATTGTCTGGAAACAACAAGGGTTTATCTGT
AAAAGTAATGCAATCAGAGCTCAAGATATTTGCTTAGACANAGGTCAGAA
TGTCTGTAACTTTGAAAGTTATCCAAAGGAGATTCCTGAAACGCTATTGG
GGTATGAGCAATGGGTGTGCATGCTTAAGAACCGCTCGTGATTTAGTGTT
TGTAGAAAATGTAGCAGTGGATTTAAAAAAATCATTCAAATTTTTGTGTT
TGTATGATTGGTATTATTAGTTTTAAATAATGTTAAGTTTTTTGTTTGAA
AATGGTTTTAGAAAAACAATTGTTTTAATCAATTTTGTTAAACGTATTAT
AATCAATATTGATTATTTGAAAGTTATTTTATTGATTTGCTTTAATAATT
GTTTGAAAGTTATTTTATTGATTTGATTTAATTTTGATTGTTCGAAAGTT
TTTNACTGATNTGATTGTGATTTGTTTGAAAAATTGTTTTTCGATTTGTT
GTGAAAAATTGTTTTTCAATCGATTCGTTGTGATTGTTTTANTTTATTAT
TTTTGTGTCTATTTCTTTCCTTTTCCTTTCCTCTTTCCCCTCTCCCTCTT
ATCCCTAATTTTTCTGTCCCTGTTTTCCNGGATATGCTTGCTACCAATGA
CGGGTCCTGGANATGCTACGTCNCAACGTCACACTGNTGGAGNTCCTCAG
CGACACTCGTTGGTCACGGGGTGG
>oenMel1-19#LINE/CR1
TTGGAACTAGATGATCTTTAAGGTCCCTTCCAACCCAAACCATTCTGTGA
TT
>oenMel1-6#LINE/CR1
AATCATAGAATGGTTTGGGTTGGAAGGGACCTTAAAGATCATCTAGTTCC
AACCCCCCTGCCAT
>oenMel1-17#LINE/CR1
CTGCCATCCCATCTGCCCAGGCCAGCACAACAGCCCCGGCCTTGGGGCCC
TGCAGAGCTGCTCCTGCTCCAGGCCCAGGGCCCATCCCAGAGCTGGGGCA
GCCACAAAGCTGTGCCCATTGCTGTTCATTCCTGCTCTGATGAGGATGGA
TCCTCAGCGGCTTGGAGGTTCCCTGATGAATTTTACTNCTCCGGAGGTGT
CTTCTTCCTTGAGCTCTTCAGTNCGGGAATTCAGTGACAAAGGCTCATAA
ATANTTGTTCAAAACACCCAAACAAGAAAAGCCCCTGGGAATAATTTAAG
TCTTCAATTCNTCTGTGGTTAATTAGANAGATTCCAGAAGTGTATTCGAA
GNNAATATACTATCTTGAAAATAATGCAGAGAGAAATCTATTTTGTTTNG
TTTTATTTTCCTGTTTATAGGTTGATATCAGCAATGTCCAGNNGATGTTG
ACCCCCAGCACCTCCTAATGCAGTCTGAATAGACATGAAAGCCAAGACCC
TTCATGGCTGGCAATCAATCACACTTTGTCCCCACCACCACCCCACCATT
TCCCTCATCCAATGGCCCCTGGCCTGNATCAGGAATAGTGTGGCCAGCAG
GANCAGGGCAGTGATTGTCCCCCTGTACTCGGCACTGGTGAGGCCGCACC
TCGAGTGCTGTGTCCAGTTCTGGGCCCCTCAGTNCAGGAAGGACATTGAG
GNGCTGGAGCGTGTCCAGAGAAGGGCAACGGAGCTGGTGAAGGGTCTGGA
GCACAAG
>oenMel1-21#LINE/CR1
TTGGACTCGATGATCTTAGAGGTCTTTTCCAACCTNAATGATTCTGTGAT
T
>oenMel1-16#LINE/CR1
GGTTGGACTCGATGATCTTAGAGGTCTTTTCCAACCTAAATGATTCTGTG
ATT
>oenMel1-29#LINE/CR1
TTGGACTCGATGATCTTAGAGGTCTTTTCCAACCTAAATGATTCTATGAT
TCT
>oenMel1-11#LINE/CR1
TCAAACTGAAAGAGGGTAGGTTTAGATTAGATATTAGGAAGAAATTCTTT
ACTGTGAGGGTGGTGAGGCACTGGAACAGGTTGCCCAGAGAAGCTGTGGA
>oenMel1-33#LINE/CR1
AGCACCTCTCCTATGAGGANAGGCTGAGAGAGTTGGGGTTGTTCAGCCTG
GAGAAG
>oenMel1-43#LINE/CR1
TTACACAGTTCGTAGTATTTGATTCTCTATTGATCCCTTCGCCTTCGATG
TTAATTCGGTCCTCATTCTTGGNTTTCTCCCCTCTCTTTTCCCAGACCAG
GTGTCTCCGACCGTGCCNGGGGTGGGTGTTCCTTGATGTTTGTGAGTTGA
TGTTCTGTTAATGGTCGTTATCTTTGTGTGTATCTTCTGNGCTGCTCCCA
GTCTGTTGAGATGTTNAGCTCATCTCTGTTGAGTGCTGAAACAGTCCCTT
GAAAAGGAACTTCAATTCCTTTCCCCCTGGGCAAAGGCGAACAAAGCCCC
TGACTGAAGGTATATAGGGAAATGTTAAACTTCTTCTCATTTCCCTCAGT
ATGAGAAAGGTATCACAGAATCACAGAACGGCTGAGGTTGGAAGGGACCT
CTGGAGGTCATCTGGTCCAACCCTGCTCAAGCAGGGTCACCTAGAGCNGG
TTGCCCAGGACCGCGTCCAGGTGGCTTTTGAATATCTCCAGGGACGGAGA
CTCCACAGCCTCTGGAGATTTTCAAAGGCTGTCTGAGCACAATAACACAT
GGANACGAATGAATTTGCATGAGAATAGATAACTGTAAAAATGTACTGTN
CCAATAAATTCTACTTATGATCATCCTCCATTATTTTTTATCATGGGATT
CCCTTACTGGACAATATTGTTTTTTCAGATGTCAGGATAATTCCACATGC
AAATGTGTTTCTTTGAACAGAGGGGATTTTAATGTGCAGCAGAGTATCTC
TACAAAACTCTCCTCAGCTGG
>oenMel1-55#LINE/CR1
ACATTGAGGGGCTGGAGCGTGTCCAGAGAAGGGCAACGGAGCTGGGGAAG
GGTCTGGAGCACCAGGAGGAGC
>oenMel1-45#LINE/CR1
GGAAAGGGAGCTCAGGGTGGAGAGCAGGAATTTCCCCATGGAAAGGGAGC
TCAGGGTGGACANCAGCAGGAATTTCCCCATGGAAAGGGAGCTCAGGGTG
GAGCGCAGGGATTTCCCCA
>oenMel1-60#LINE/CR1
CAAGAGGATGGNGCCAGGCTCTTCTCAGTGGTGCCCAGCGACAGGACGAG
GGGCAATGGGCANAAACTGAAA
>oenMel1-64#Unknown
GCACCAGGTCTACCCGGGTAGACCTGTTGGCTCCGGGAGGGCCGGCGGAC
ANCA
>oenMel1-68#Unknown
CCGGGTAGACCTGNTGTCCGCCGGCCCTCCCGGAGCCAACAGGTCTACCC
G
>oenMel1-71#LTR/ERV1
TGATGCCTTAAGTTTTAGCTTTCATATTTTCCAGATTCTGTACTGCATTA
GTGTGTAACTCTGAACTTCATATAAAGTGTTAG
>oenMel1-72#LINE/CR1
GTGATAGGACAAGGGGNAATGGCTTTAAACTGAAAGAGGGTAGGTTTAGA
TTAGA
>oenMel1-81#LTR/ERV1
GCCACGGCCGGGCTCTTGTACTGCCCAAGGTGTATCCTTTGAAGGCCTTT
TAATAAATACCTACTTTATTCCTTTAACNCTGTCTAGCCTCTGTTCCAGG
CAGCCCCTCAAGGCATCA
>oenMel1-83#LTR/ERVL
TTGTTGCTGTTACTGTTCGTTTTCTTATCTCATTGCTGTTTCCAGTAAAT
TGTTCTTATCTCAACCCGTGATCTTCGCCTTTTGTGCCTCCAGTTCTC
>oenMel1-92#LTR/ERVK
TTTTGCTTCTCCATTACACGAAGAACTATGTTGCATTATCCTTTTCGCCG
CTCTCCTATAGCCTNAAATGCAACA
>oenMel1-96#LTR/ERVK
TGTGCCTTTTGAGACTGATGTGCTTTGTAATAAATAACCTTTTAGCAACT
ATTAGCTGCTTTGCTCATTTAGAAGATAACCCGACGAAGTNGGAGCCT
>oenMel1-97#LTR/ERV1
TTTGTCAAGTCCCACAGATAACCATCTGGTCTTGGTAGATAAAAAACGGC
AGAAGTCGGGAAGTCTGGTCTTTAGCAGATAGNCTGCGATTGATCACACA
AAGGCAGGAAATCTGATTCTGCAAAATCTNTCGGGCTGTGGGAAAGCCTT
GTTTTGCAAACTGGTAGTAGATACAACTTATTTAGAAAACATAATATAAC
AGGGGGATTTAAAACAGAATGGTTTAATCATATATTTCCCTTTATCTAGT
GTCCATGCTTCATTTCAGACCTAAGTATTCTGGTTTATACAAACCCCAAN
ACTTCTATGATTAACACGAATCTTTTATCAATTATCACA
>oenMel1-99#LINE/CR1
CAGGGCAATCCCAAGCACAAACACAGGCTGGGCGGAGAACGGATTGAGAG
CAGCCCTGAGGAG
>oenMel1-100#LTR/ERVL
TGGAGCAGGGGAAGAGTGTGAGGAGTCCTCCCCCTGAGGAGGAAGGAGCA
GCAGAGACAACGTG
>oenMel1-107#LINE/CR1
CTGAAGTGGTCAGGCAGTTGGACTAGATGATCGTTGTAGGTCCCTTCCAA
CTGAA
>oenMel1-112#LTR/ERV1
AGCAAACTTGGGGTAAATGACTTCATTACCTGAAGCTGTAATTGGAAGAT
TAA
>oenMel1-114#LTR/ERVL
TCTGTAAAGAGAGCCCCTTCTCCATCCCTTGGGTCTGTAAAGGGAGCCCC
TTCTCCATCCCTTCCCCCCCTGAGCCCCCATTNACAGTGTGAAGAGGCGG
CCGAGCTCGCGCCACAGCGCCCCCTGCTGGGCAATCATCGCACCCGCCCT
GCCCGGCCGGGAGCCAGCAGCGCCCCTGCTGGCTGTGCCCGGAACTGCAC
CCAAGGGGAAAGTGCCTGCAGCCCAGAGCAGCTGGGACTGGGGTCTGGGT
CTGTTTGGTGCCGCTGCCGTGGTGCTGTTTGTTTGAGTTTGTGAGAAACG
ACGCTCACTTTAACAATTTCAAAGGTTTATTAAACCTTAACAAATACAAC
AAAGGACTGAATAAGGAAAAAGATACGGCGCCGGGAGAGGATGGAGCACA
CAATATCTACCCTTGCACAGTCCATGTAACTGAACTGTTTTCTAGGCCAT
AAAAAGAACTTTGTCCAGAGGGTTCCCAAGGAAGTCAGTGCTGTGAGCAC
AACTGAATGAAGAATGCACAACTTCCACNTTC
>oenMel1-117#LTR/ERVK
TGTTGGGGAGGATGAANCAGGAAAACCTTACAAATATGANTGCCTAGCAA
AAGATTCTGAGAATATGGAAACCATAAGCGAGATT
>oenMel1-126#DNA/Dada
GCCGCCTTGTGGGCACAGCGCGGTACTGCAGCCAGCCGCCGAGCCGGCGC
CCTGGCAGCGCTGCCGCCTTGTGGGCACAGCGCGGTGCTGCGCGCGTGCC
CTTCCGATGACGGGAGCGAGCGCGTGCCGGGACGCTGCCCTGTAGGACTG
CCGCCACGCTGCGGATGCCGCTTGCGGCAGGAGCCCGGCCGAGACAAGCA
TCCCCGCCCGTGCCTGCCGCCGCTCGAGCGTCGGCCGGAGCTCTTTTCGG
CGTCGTTGCCGGATTCAGGCAGGCGACTTAGAAATTGACATGGTGAGGGG
CGTTAAGGGTACCACAACAAAGATGGCAGCCGGGCCGGAAGTGGCCTCTG
CCAGTACTAAAGATGGCAGCAGCGAAGAGCGGAAGTGACGTCTTGCCACT
CTCAAGATGGCGGCTCGGCCGGCACTCGCCTGACCTTCTATATCTGGCGG
CAGAAAGGGCGGGAAAATCAAGGACCCCAGTCTGTTTTTNGGGCTGCCTG
CCCGCGACGCCGACACCGATCCCCGCGGCGCGATTTTCTGCGGGGTTTCC
GAGAGTGCGGACACGGGCTGTGGGCTCAGCGGCGCCGCGGGCGCGCGGGA
GACGGGCGGGCGCCTTTCTCTGCCGGGGTCCTGTACTGCCGGGGGCGGTA
CCGGGGGCGGGGCCGAGGGCGNTACCCGGGGCGGTACCGGGGACGATTCC
GGAGGCGGCACCGAAGGCGGTACCGGGGGCGGTACCAAGGGCGGTACCGG
>oenMel1-130#LTR/ERVK
AAAAGCCATTTATTAAAGAAGCAATAACACTTTTATAGACTAGATCGCGG
AACCGAGGATAGAANTAANCTCATTGGTNCAAGGAAGGTAACACCCCT
>oenMel1-138#Unknown
TAAAACTTCTTTTACAAAAGTNAACCTTATAAAACACATAGTATTNACTT
TAACGATTGCTAAAGCCAACACTGTAATATATTTATCACAGTGGCCTTGA
GCTTAGAGCCGGGCTGGGGCTGGGGACTGGGACTGGGGCTGGGACTGGGN
CTGGGNCCGGGACTGGGGCTGGGNCTGGGGCCGGGACTGGGGCTGGGNCT
GGGACTGGGGCTGGGGCTGGGACTGGACTGGGGCTGGGACCGGGGCTGGA
NCTGGGNCTGGGACTGGGACCGGGGCTGGGNCTGGGGCTGGGACTGGGCT
GGGNCTGGGNCTGGGGCTGGGNCTGGGACTGGGNCTGGGGCTGGGCACTG
GGNCNGGGGCTGGGACTGGGGCTGGGNCTGGGACTGGGGCTGGAACT
>oenMel1-140#Unknown
TGTCAGTCCCAGGTGGGCGATGNCAGACATGGTGAGGCTGGGGGTGAGGA
GCAGGTTGTCCAAACNGGGTCAGNCCGCAAGGGGCNCATTCTTCTNCGTG
CCCAGACCTCCTGAGGAGACATTCGGCATCAANATCANTCGCGGAATGCT
TCNATCACCTCTTCAATGAACTGAAATAAAAAAAAAA
>oenMel2-2#LINE/CR1
CATGAGACCACACCTGGAGTGCTGCGTCCAGCTCTGGGNTCCCCAGCACA
AGAAGGACATGGACCCGCTGGGTCCAGAGAAGGCCACAAAGATGNTCAGA
GGGCTGGAGCACCTCTGCTGTGGGAAAGGCTGAGAGAGCTGGGGTTGTTC
AGCCTGGAGAAGAGAAGNCTTCGGAGAGAACCNGTTCCTGGAGGGGGTGC
AAGAAAGACGGAGAGGGACTTTTCNCAAGGGCTGGAGTGACAGGACAAGG
GGNAATGGCTTCAAACTGAAAGAGAGNAGGTTTAGATTGGATATCAGGAA
GAAATTCTTCCTGCGAGGGTGGTGAGGCACTGGNACAGGCTGCCCAGAGA
AGCTGTGGNTGCCCCATCCTGGAAGTGTTCAAGGCCAGGCTGGATGGGGC
TCTGAGCAACCTGGTCTAGTGGAAGGTGTCCCTGCCCATGGCAGGGGGTT
GGAACTAGATGATCTTTAAGGTCCCTTCCAACCCAAACCATTCTGCGATT
CT
>oenMel3-10#LTR/ERVL
GCTGGGGTAGAGTTAATTTTCTTCGTAGTAGCTGGTGTGGTGCTGTGNTT
TGGATTTGTNCTGAAAACAGCGTTGATAACACANNGATGTTTTAGTTGTT
GCTNAGCAGTGCTTACACAAAGTCAAGGNCTTTTCTGCTTCTCACGCTCT
GCCAGCGAGCGGGTGNACAAGAAGCTGGGAGGGGACACAGCTGGGACAGC
TGACCCCAACTGACCAAAGGGATATTCCATACCTATGGAGCGCCATGCTC
AGCATACAAGCTGGGGGAAGAAGAAGGAAGGGGAGNATGTTCGGAGGGAT
GNTATTTGTCTTCCCAAGTAACCGCTAGACGTGATGGAGCCCTGCTTTCC
TGGGGATGNCCGAACACCTGCCTGCCCACGGGAAGCAGTGAACGAATTAT
TTGCTTTGCTTTCTCGTGTGCAGCTTTTGCTTTACCTATTAAACTGTCTT
TATCTCAACCCACGAGTTTTCTCACTTTTACCCTTCCGATTCCCTCCCCN
ATCCCGCTGGAGGGAGCGAGCGCCTGTGCGGGGCTTAGCTGCCGGCTGGG
GTTAAACCAT
>oenMel4-2#LINE/CR1
CGACTTCTGNAAAGGACAATAAAAAGCGTTTCTATAAGTATAATTATGGC
AAAAGGAAGGACAAGGCNAACCTTTATTTTCTACTGGTGAGAAGGGAACT
TAGTAACTGCAGATGAGGAGAAGGCNGAGGTGCTTAACGCCTTCTTCGCC
TCAGTCTTTANTGGGAAGACGGCTTGTCCTCAGGACAACTGCCCCGNGAC
GGCAGATGGTGTCAGGGAGCAGAATGGTCCCCTGGTATCGGAAGGAGGCA
GTCAGGAGCTGCTGAGCCANTTGGACGTTCATAAATCTATGGGNCCGGAT
GGGATCCATCCNAGGGTGCTGAGGGAGCTGNCAGATGGCTTGCGAAGCCN
CTCTCCATCATTTACCAGCAGTCCTGGGACTCTGGTGAGGTTCCAGATGA
CTGGAAGNNGGCAAATGTGACACCCATTCATAGAAAGGGCGGNAAGGAGG
ATCCNGGGAACTNCAGGCCTGTCAGCCTGACCTCAGTNCCTGGNAAGGTT
ATGGAACAGTTTATACTGAGTGCCATCACGCGGCACATANAGGATGGCCA
GGGATCAGACCCAGCCAGCGTGGGTTTAGGAGGGGNAGGTCACGCCTGAC
CGACCTGATCTCCTTTTATGACNAGNTGACCCGNCTGGATGAGGGAAGGG
CNGTGGATGTCGTCTACCTGGACTTCAGCAAAGCCTTTGGCACCGTCTCC
CACAGCATTCTCCTGGAAAAGCTGCAGGACGCGGCTTGGACAGGTGCACT
NTTNGCTGGGTTAAGAACTGGCTGGATGGCCGGGCCCAGAGAGTGGTGAA
CGGCGCTACGTCCAGNTGAGGCCGTCACNAGTGGTGTTCCCCAGGGNTCG
GTGCTGGGGCCAGTCCTGTTTAATATCTTCATTAATGACCTGGATGAGGG
GATTGAGTCCTCATCAGTAAATTTGCAGATGACACCAAGCTGGGAGGGGT
GTTGATNCGCTGGAGGGNAGGAAGGCCCTGCAGAGGGACCTGGAGCAGCT
GGATGGATGGGCAGAGNCCAACGGTATGAGGTTCAACAAGGCCAAGTGCA
GGGTCCTGCACCTGGGNCANAGCAACGCCCTGCAGTGNCACAGGCTGGGG
ACNGAGCGGCTGGAGAGCAGCCCTGCGGAAAGGGACCTGGGGGTGCTGGT
GGACGGCAGGCTGAACATGAGCCAGCGTGTGCCCTGGCGGCCAAGAAGGC
CAACGGCGTCCTGGCCTGGGTCAGGAGCAGCGTGGCCAGCAGGNGCAGGG
AGGTGATTNTCCCCCTCTGCTCNGCACTGGTGAGGCCNCACCTCGAGTGC
TGCGTCCAGTTCTGGCCCCTCAGTACAGGAAGGACATTGAGGCGCTGGAG
CGNGTCCAGAGGAGGCAACAAGGCTGGTGAGGGGCTGGAGCACANGCCCT
GTGAGGAGNGGCTGAGGGAGCTGGGGCTGTTCAGCCTGGAGAAGAGGAGG
CTCAGGGGAGACCTTATCGCTCTACAGCTNCCTGAAGGGAGGCTGCAGGC
AGGCGGGGGCCGGTCTTTCTCTCCGGGCAGCAAGTGACAGGACGAGAGGG
AACGGCCTCAAGCTGNGCCAGGGGAGGTTTAGGTTGGATATTAGGAAAAA
NTTCTTCACCGAGAGGGTGGTCGGGCACTGGAAAGGCTGCCCAGGGAAGT
GGTGGAGTCNCCATCCCTGGAAGTGTTCAAGGACAGTCTGGACGCGGCAC
TCGGCGCCATGGTNTAGTTGAGGTGTTAGGGCAGGGGTTGGACTCGATGA
TCTTGGAGGTCCCTTCCAACCCAGTGATTCTGGT
>oenMel4-351#LTR/ERV1
AGCCCCTCCTCGTGAGGGATCTCCGGGGCTTTTCCTCCTCCTCCATCCGC
CCACGCCTTGGGAATGAAAAATCCTGGTTTGGGGGAAAAAAACAAGAGGA
GAGCGCCTTGGNCTGGGGGTTCCTCCTTGCCCAAGTTCANCTCAGGAAGT
CACTGGGCATCTTGTGTCTGTAAGAACCTCCAAAACACCAAGATTCAGCC
CAAAAATCCTCCAAATATCAAGACACAGATNAAAAAGCCCCGCAAACGGA
GAGATTTAGCCAAACCCCCTCCAAAATATAAAGATTCAGNCCCTGCAAAA
AACCAAAGCANCAACGCTTAGNCCAATAAAGCTCAGAAACACCAAGATTC
ACCCCTGTGAAAATCATGGATCCCCCTCCCCTGTCACCTGCTGCATGTGG
GGGGAGCAACGCTCCTGGGGCTGGGGGAGAGGCTGCAGACACAGGGAGGG
GTGGAACCTTGTGCTGCTTCCCGTTTCTGCTCCTCCTCCTCCTGTGTCCC
TGCTCTTCCTCACACTCCTCTTCCTCCTACTATTCCTCCTCCTCCTGCAC
AATCCCACCTTCTCCTCCCACGTGCATCGTTTGACCATTTTGTTCTTCAA
CCCTGCTTCTCCTTCCCTTCTCCTGCTGCCCCCAGGCCCAGCACCCACTG
CCGGCTCCCTCTTCCCCCCAAACCCACAGCATCCCAGCGCAGGGGCAGGG
ATGGAGCTGGGGCAGCTCGGGCTGGGGCAGCGCTGGGCTCTCGGCCGCTC
CCGCCCGCACTCGGTCCCCACTGCAGCCGCTCCCGCCACGACAGCGCGGG
GGGGCCCGGCCTTGGCGCTGCCCCCCTCCCACCTCCCCAAATTCCCCTCC
GGGGGGCGCTGGGCCCGGGGGGGGCGCAGGTGGGGTCCGGGTGGGGAACG
CTGGGAGCTGCGGCTCTGCCTGGACCCCCATGGAAGGAAGAANAGGAAAG
TGTCTTTACAAACAGATGCTGGGAATCCCCTTGGAGATAGGGCCAGGGAC
GGGTACGTAAGGAAGTGACAGCAGAAGCCATCGGGTTCAGAAAATGTTAT
TAATTGACCACACAGACTGCTGCTCAGCCAAGGNCCTGCTAAATTCATGA
ACTCNCAGAAGAAGAACAAAGACNTAACAGAGCCATGAATATGGTTAGCT
ATACAAAAGTGGGGTGCATATTAAGGGGGGGATGCAGTGGGTGCATTGGG
AAGTCTGTACCTCTCAAGTACTTCAGCCAAGTAGAAGAAGCCTCTGTGAA
ATGGCTGAATGTTCAGGCTAAAAAGCATCTTTCAGTATTTGGAAAAAAAA
AGCGCAAATAGAAGGGAAAAGGTTAAATATTTGGGACATATATTGACTGA
AGGTTTGTGCTGTATTGACCCAGAGAAGGACCAGGGAATCTCAGAAGTAA
CGTTACCCAGCANTAAAATGGAGCTGGGACAATTCTGAGAACTAATAAGG
AATTGCAGGACCTGGATTGAGGATTCTCTGTTCGAGCCAGAACATTGTAT
GAGTTTTTAAACCCAGACAGCCTCAATATTGTGGTATGGATTCAAGAAAC
AGCAAAACTTCAGAAAATAAATAAAACCAAAATGNTTGGTGCCCCAGCCA
TGGCTCTTCCAGACTCAGAAAAGAAATTNGAATTGTATGTGTGTTATAG
>oenMel4-116#LTR/ERVL
TGACCTCCGTTGGGCANAGCCCTGNTGACCCGTGGCCCTGGTNATNTGTG
TTGGGAGGACACCTGGCTGGGGGGCTCTGCATCATCCTGTCTCCCTGTGG
GCACCTGNATGAACNCAGGGGCANNAACNTCCACCGGGACGCAAACCGAC
ATTGGGAATTCCTTGGGGAGAATGGATTTGTTGACTTTCAACCCCGGAAA
ATCTTCTGTGTTTCAATCCTANCTCCTGNNGGCACCCAGGAATACTAAAT
GGTCTCGGAGGTCTTTTCCATGTGGTGGTTTGTAAAGATTTCCTGAAATT
TTTCCCTGCCGAGACCTGGGCAGTCTCCCTTGTATCTGACAAGGACCAGT
CAGTGTCGGATTTTTAATATTGACACATTGTTACACCAATGAGAAAGTGT
ATGCGTCTTTGTGAAACACACATGTAAAGACAAAAAACCCCGGGAAAGTT
CTCTTTCCCTTCTGGCCTCTCAGAAAGTAACACCGGCCCAGGCCCCCTNC
ACACGGCCGGGCCAGGCAGGGGCGGGCGGGCTCTGACNCAGGGCTCAGGA
AGCTGCCGGGCCCCCTTCAAGCAGGGGCCCCGATATCCAGGGAAAGGGGA
GGAAAGGCCCGTTGCTGACATCCCTGCCCCCGGCGCGGCCGCGGCTCGGC
AGAACCCTGCCCTGCCCCGGCCCGGAGCGGCTCCGAACGGCCAGACCCGC
CCCGCCGCCCCCGCGGCCTGGGGGAGAGACGGCTGGGCCCTGTTCTGGCA
AGGCCCCCACACCCTTGCCTGCCGGGCAGGGTGGAGGGAGGACCNCCGGC
CCGCGGCTGGAATTGAGTGCAGCGGGTGCCGGAGAACAGCCATGAAGCCA
GAAACTCATCACCGCTTCTCTGACTGGGCCCTTACNATCCTNGCCCAGCC
CCCAGCGCGGCCTTGAAAGACTCTTTATCAAATAACTCCGACCGCCCCAC
CTGGAAGAGATCACAGAACCCTCTGCTGCCCGGGCAAGGTATTAACTCTT
TCAATGCCCAGAATAAAACTTTGCAGATACTTTGTTCTCTCTCCTAAGTN
AAAAAAAAGAACCAAGACGANGATATGCACAAAAAGAATAAAAACACCAA
AGTCAAACAAAAGGAAGAACAAAACCAAGATAATGATACGCACAGAAACA
ANATAAAAACACCGAAGTCAAACAAAAAGAAAAGTCAAGTCCTAAATAAA
GAAAGAAGGAGANTCGTGGACTGAAATTTCTCTTTTTTTANGCTATGGAG
AAAAAACTCTCGTTTCCCTATAACACATAAAAATATTATGGAGTGAGTAT
GAATGTTCTAACTGTAAATATGAGCAAAGGCATTAGTGCTAAAGTAAGCA
AATGTTAAAATTGCTGTAATCCCNTAAGTTTAAATAATAAGAATAAGCTC
CCTGCTGTCCCCCAAGGAAGAAGAAGAAAAAANCCCTATGTTCTCAAAAA
TAAAATAAGCTTTTGTTTAAACTGNTATAATCCTTAAAGTNTGCCTCGTA
AGTTAATACGGTCCTCAGTAANGATTATGAGGAAAACTGTTAGTTTGAAA
AAAGGGTTTTTANANAGTAATCAGATTTCCATTCTCCCGGGCGGCTAATC
ACTGTGACATCAAAGCCANAAGAAAACTTTCTTGTGAAGAAATCTCCATA
GACTGAAAAAAGTCTCCTCTTTCAAGTAAATTAGTAAAAAACTTTTTTAA
AGACGGTAAACTAGCTGATTTGTTTTTGTACGTTTTCGGTGTGAAANAAA
AGAAAGTGGAGGGAGAAGGAGTGTTCTAAAAGTTTTATTCTGAGNTTTTT
TTCTTATAGTTTCTAGTAATAAAGTTTCTCTTTGTACCATTTAAAGTTGA
GCCTGTTTTTGCCTTCCTCCTAATCCTATCTCACAGCAGGAAAATTTCAA
ATTGGCGAACCGAAACCACTACATCGAATTAGTATTTCTGCCCAGGACTT
TGATCT
>oenMel4-99#LINE/CR1
AGCACAGCGAATAGGAGCATGGTGAACAGGAGAGGNCAGACAGGGGCGCG
GCCGGTCTGGGGGCGTGGCAAACAGGGGCGTGACAGGTNTCGGAGGTGCG
TGNCNCGGCAGTTTGTGTNGCAGNNCGAGCAGGCAGGGTCGCAGGTTTCT
TCCAGCTGGCGAGGCTCGCCTGTGTGTTGTTTCTGTTGNTCGGCTGGTNT
CGGGTATTCTATTAGCAATGGTTTACACACGATCGAAAACCGTNGTTAGT
ANAAGCGTGTGTAACCAAATAGAGCCCCCCAAGAAGNACGCANCTGTCCA
GGCCCGTNNCTGCGNGGAGTGTTTGAGCCTATCGGTGGTACCAGAGGACA
NTGCAGAAGAAGCCTGCGTGCGGTGTGAACAGGTGAATGATCTCCTTTCG
CTGGTGGCNGAGCTTAGGGAGAAGTTGAAAGACTGAGGAGTATTAGGGAA
AGCGAAAGGAAATAGATTGGTGGAGTTNCGCCCTCCCATCCCTGAGGGAG
GCCCGCAAGAGTCAGAGGANTCCCGAACCTCCCGCCGTCAGGCAGAAGGA
GGANACTTAGTCGACGAAGGGGAATGGAAACGGGTCCCTGCTTGGGGAGG
CCAGTAAAATTCCTCCCGGCCCNCATCGCCTTNCCAGGTGCCCTACAGAA
TAGGTACGAGGCCCTGGATGTAGAAAGTACCAGATGATAAAGAAAATGAT
CTGNCCGGCGAACCTNCCAATTACGCTTTATCTGTGAGACGGATCACCAC
CTCCAACATCAAGAAGAAAAGAAGGGTAGTTGTGGTGGGTGACTCCTTCT
GAGGGGAACAGAGGGCCCCGTATGTCGACAGGACCCGTTCCACAGGGAAG
TCTGCTGCCTCCCTGGGGCCCAGGTAAGGGATATCACCGGGAGTCTCCCT
GGGCTGATCCAGCCCGNTGATTATTACCCACTGTTGGCCGTCCAGGCTGG
CAGTGATGAGATTGGAAAGAGGAGTGTTAGGGCAATTAAAAGGGACTTTA
GGGCACTGGGTCANGTGGTNGACAGGGCAGGGGCNCAGGTAGTCTTTTCC
TNAGTCCCTTTGGTGGCTGAGAAAAACAGTGAAAGGAATAGGNGGGCNCA
CATTATTAANCGGTGGCTCAAGGGTTGGTGTCATCGGCAGAACNNCAGNT
TCTTTGATCATGGGGCAACTNTTACGGCACCTGGCCNGCTGGAACTGGAT
GGGCTCCATNCTTCTGTTGAGGGCAGAAGGATTCGAGCTCACGAACTGGC
AGAACTTGTTGAGAGGGCTTTAAACTAGGCTCAAAGGGGGAGGGGGACTC
AGTTGGGCTGTCTGAAAGCAGGCCCAANGGTGGTAAGNCTGAGCTAGGGG
TGAAATCAGTGGCCCAGCTGAGGTGCACGTATGCCAATGCACACAGCATG
GGTAACAAACAAAAGGAGCTGGAGGCCACGGTGCAACAGCAGAGCTGTGA
CGTAGTCGCCATCGCGGAAACATGGTGGGATGACTCGCACGGCTGGAGCA
CNGCACTGGATGGCTACAAGCTCTTCAGAAGAGACAGGAAAGGAAGAAGA
GGTGGAGGGGTAGCCCTTTATATTAGGGAGGCTTTTGACGCCATAGGTAT
TGAAACTAATGACGATGGAGTTGAATGNTTATGGGTAAGAATTAAGGGCA
AGGCTAACAAGGCTGACATCGTACTGGGAGTCTGTTATCGTCCACCCAAC
CAGGGAGAAGAGGTGGACAACTTATTCTNTAAGCAGATAACGTTTCAGGA
TCATCAGCCCTTGTTCTCGTAGGTGACTTTAACCTACCAGATATCTGCTG
GGAACTTAATACAGCAGAAAAAAGGCAGTCCAGGAAGTTTTTAGAGTATG
TGGAGGATAACATTTTGTCGCAGCTGGCGAGTGAGCCCACCAGGGGAGAG
ACTATGTTA
>oenMel5-1307#LTR/ERVL
ACAGAAAGACATATGTAAGTGTTGAAGGTCTGAGTAAGTGAAATGAGAGG
AAATGTGTAAGTGNTGAAGGTTTGAGCAAGTCGGATGAAAGCTTTACGTT
GTGNTTAGTGGGTGTATATCCCAATCGTGTGTCAACGTTCACGATGTGGG
ATAAGGGGTGGAATGTCCTGGGTTGGTGTTNTGTCTGCTCCTCTCCCGCC
CCCACACCTCGCTGTCTGCATGGAGCTGCCGCCGGTGCCCTTTCTCCCCC
CCCGGGGGGGTGGTGCCCCGGGGCTGTGCTGCTTGGCTTGCCCTGCTGCC
GCTGCTGCTGCTGCTGCTGCTGCTTGCTGCTGCTCGCTGCTGCTCGCTGC
TGCCCCGGCCCCGCTGCTTTTGCCCTATTGCTTCTGCCCCGCTGCTGCTG
CTGCTGCCCCGGCTCTGC
>oenMel5-242#LINE/CR1
AGGAGAAGGACCTGTTGGAGCGAGTCCAGAGGAGGCCACGAAGATGATCA
GAGGGCTGGAGCATCTGCCCTATGGAGAGAGCTGGGGTTGTTCAGCCTGG
AGAAGAGAAGGCTNCGGGGAGACCTTATGGCACCTTCCAGTACCTGAAGG
GGNTACAAGAAAGCTGAAGAGGGACTCTGCAGCAGGAACTGNAGTGACAG
GACAAGGGGGAATGGCTTCAAACTGACAGAGGGTAGGTTTAGATTGGATA
TTAGGAAGAAATTCTTCNCTGTGAGGGTGGTGAGGCACTGGNACAGGTTG
CCCAGAGAAGCTGTGGNTGCCCCATCCCTGGAAGTGTTCAAGGCCAGGTT
GGAGCAGCCTGGTCTAGTGGAAGGTGTCCCTGCCCATGGCAGGGGGTTGG
AACTAGATGATCTTTAAGGTCCCTTCCAACCCAAACCATTCTGTGATTCT
ATGCTGTAGCAGTCACAGAGGAAGGAAANAGCTCA
>oenMel5-6219#LTR/ERVK
GGAGGATAGTTTGTAAGGATAGTGCAGAAGGCAATCTTCCCCAATGAATT
ACAGCTGTACTGATTACCGAGGAGTGGAAACAGCCTTGCCTGCCCAATGA
GGATGGGTGTTATAAAAGAGTGGGCTAGCTGGCCGCNAGTTGCAGTGGAG
CTTGAGACCAGAGTCTGCTGCAGTTTGGGATGGAGTCTGCTGGCTGTGCT
GTGAGGAGGAAGGGACGTGCGGTCGTGCAAGGGACAGACAAGGTAAGAAG
ATGCTGTGTGAGGGACAGACAGGGTTAGGTGGCCGGGTAAGGGACAGGTT
GGGGTTAGCCAGTCATGCAGAAGGAAGAAGGAAACTTGCAGAGAGGAGAG
AAGGAGTCAGTGCTGTGTGGAGCTGCCTGTGAGGAAAGAGTTGCCTGAGA
GAAGGCATGAAAAGTTTTTAATAAAGGACTGGTGATGGTGCCAGTCGTGT
CCGTCTCGACATAATTACTA
>oenMel5-1876#LTR/ERVK
CCTTGCTCTCCTTTCCCTCTCCCTTTACCCCAATACCCTTTTATCCCATT
ACTCTTCTCCTCTTCTTCCTCTCTTCTCTCTTTTCTTTTCCTCTTCTCTT
CCCCTCTTTACCTTCTTTACTCTCTCTCTNTACCCTCCTTCTTCTCTCTT
TCTCTCCCCCCTTTTATCTCTTTAATCTGCACGTGGCTGTGCCGGGCAGC
TCCTTGCAGACTCCCTTATAATAAACTGCAACTGTAGCTTTTAGCATTTA
CAGAGCGTCTGAGTCTTGTTCCTCGCGTCCACCCTGATACAAAGAGTCCA
GGAGTCCCCCGC
>oenMel5-1014#LINE/CR1
ACTCTGATGGNNTGCACGCGTTGAGTGCTGGGGGATCTGGCAGNNATCAC
NGCGAGGNCTCTCGTNACNANCTTTGGNGGGTCACGGCGANNAGGGAAGG
TGNCTGAGAAAAGGAATATTTTACCCTTCNTCAGAAAGGGCAAGAAGGAG
GACTCAGGGCCAGCCGGTCAGCTTCACGCCGGAAAGGTGGCGAGGAGACT
CGTTCTGGAGGCTGTCTCTTNCCAGGCATGGAGGAAGGAAGTAGTTTAGA
GTAGTCAGCATGGGTTTGCTAAGAGTAAACCATGCTCGATCATCCGATTG
CCTTCTATAATGAAATAACTGGCTANGTGGATGGATGAGAGAAGAGCAGN
AACAGTATCTTCAATATTATGTATATGTGTGTTATTATGTAAGGGTCTCC
AGCNAGGNTTTCGACACTTAGTCCCTCACAATGTCCTACATAGGCTAGAA
AGCCAGGCAGTGTGTGATAAGCGGAAGCGAGGTGGATTGAGAACTGGCTG
GACGGCNGATCCCAGGGGGTNTNANCAGCGGCACGGAATCTAGCTGGGGC
CTATAANTAGCGGTGTCCCCCAAGGTCAATTATTGTTTGACTTNCCCATC
AATGGCCGGGATGAAGGGACAGGACCCTCAGCAGGTTCGCTGGTGACACA
AAACTNGGAGGAGTGCCGGAGAGCTGTGCAGCCNCTCAGAGGGACCTCGA
CAGGCTGGAGAGATGGACTGAGAGNAACCGCGTGAAGTTCAGCANGGGCA
AATGCAGGATCCTGCACCTGGGNAGAAACCTCACACCAGTACAGGCTGGC
GAGCGGCTGGCTGAGAGCAGCTCTGCAGAAAAGGACCTGGGGGTCCTGGT
GGACAACAACTGNNCATGGGTCAGCAGCCTGGGGACCAAGGAGGCCAANG
GNATCCTGGNCTGTACCGGGAANAGCGTGGCCAGCAGGACCAGGGAGGTG
ATCCTGCCCCTGTGCTCAGCACTGGTGAGGCCGCACCTCGAGTNCTGCGT
TCAGTTCTGGGCCCCTCACTNCAAAGAGGACGCGGAGGGCTGGAGCGNGT
CCAGAGAAGGGCAGCGGAGCTGACGAAGGGTCTGTAGNANAAATCCCTAC
GAGGAACGGCTGAGGGAGCTGGGNCTGTTTAGCCTGGAGAAGGCTCGGAG
GAGACCTNATCGCTCTCTGCAACGCCCTGACAGGAGGNTGTAGCGAGGTG
GGGCCGGTCTCTCTCCCAGGNAACAAGCGACAGGACAAGAGGAAATGGCC
TCAAGTTGCACAGGGAGGTTTAGATTGGATATTAGGAAAAATTTCTTCGC
TGAAAGTGGTCANGCATTGGAANAGGCTGCCCAGGGAAGTGGTGGAGTCG
NCATCCCTGGAGGNATTTAAGAGCTGCGTGGATGCGGCGCTGNGGACATG
GTTTAGTGGTGACTTGGCAGTGCTGGGTTAATGGTTGGACTCGATGATCT
TNGAGGTCTTTTCCAACCTNAACGATTCTATGATTCTGTGAGAAGGAAAA
AAAATTAATCTGGTGGTATATGTGAACATA
>oenMel5-9161#LTR/ERVK
AATGGTGGTGTTGGGGTGGGAGGTGATCATGGCCGGGACTGCGGGGAGGC
ANAGTGTTGTAGGGNAGGANGAAATCAGAAAAACCTGCAGATATGANTGC
CTAGCAAANGGTTCTGAGAATATGGAAACNATAGGTGAAATAGAAATGAN
AGCAGTGTTTTGATATAGAGACTGGAGACAGTCATGTGAAGGTTTGAGGC
CTCTCCCTTTGTTTAGATGATGCCAAATGCCGCAAAGTACCAAAGAGCCA
ACAGANATCCTGTCCCAAGCCTGGCAGGAAGGGTCCGAAGATAAGGNTTA
NAGATAAGAAAGCCATAAAACATGGTAATNTAGTGGTTCCTACAGGTTGC
ATGCAAATGTTAGGGAATTNGTATNTTGTACTAGATTGGTTAGTGGAAGA
TTAGAATATTCANCATAGAAGAANACTTATTGTATTGTAAACAGGAAATC
TCACTCTCTTGCTCTCACTCTCTCACTCTCTTGCTCTCTTACTCTTACTC
TCCGTGCCCCTCACTCTCGCTTTTACCCCCTTTNTTATCTCACTCTCTCT
GTCCTGCTCTGGGCTGCGGCTGGCAGCCCCTAGCAGGGCCCTGTACACCC
ACGCCCTTACAATAAACTGCAAACCTNAAGACCAGAANATAGAGAGCTCC
TGAGTCTGTCCTGACGACCGTCCACCACCAACTCCCACA
>oenMel5-1001#LINE/CR1
TCCTTGATTTGTTGTTTGCTAACAGAGAGGGTCTCGTGAGTGAAGTGGCG
ATTGGTGGCCGTCTTGGCCACAGCGATCACGAAGCAGTCGAGTTTAAAAC
TTCAGACTGCTCAGGGAACTAGTNAGTAAGGTCCCCTGGGAAAATGTTTT
TGAAGGTGCTGGGGTCCATCAGTGCTGGTCACTTTTTAAGCACCACCTCC
TAAGGGCACAGGAGCAGGCAATTCCAAAATGTCGGAAGTCAAGCAGGTGA
GGCAGAAGGCCGGCTTGGCTGAACAGGGATCTTCTTCTGGAAATAAGGCA
AAAAAAGGAAGGTGTATGNCCAGTGGAAGCAAGGTCAGGTGACACGGGAA
GANTACAGAGATGCTGCTTGCCACTGTAGGGAGAAAATTCGTGCGGCCAA
AGCTCAACTGGAGCTGAAGCTGGCCAGAACTGTGGGGGACAATAGAAAGG
NGTTTTAAAAATATGTTAATAGCAAAAGNNAGCTAGAAATAACACTGTCC
CGTTNCANGAGGAGGGTGGTCACCTCACAAACAGGGACATAGACAAAGTA
GAGATGTTTAATACTCTCTTCTGTCTTCAACACCGATGACGGACCANGGG
AGTCCCAGTGCCCTGAGCTGGAGGACCATGACTGTGAGAATGATNAACTC
CCAGTCAACCCTGAACT
>oenMel5-1327#RC/Helitron
GGAAAAAATGGGGGATTTGGGGGAAAAAATTTGGGAATNAGGGAAATTTC
GGGAAAAATTGGGGAAANTTCGGGAAAAAATCGGGGAAAAANTGGGAATT
TTGGGGAGATCCGAAAATTGGGGATTTTGGGGCAAAATTGGGATTTGGGT
TCAAAATGGGGAAAAATGGGGAATTTTGGGGGATTGGGGCGGAAATTTTG
GGGATTTCGGGGGAAATCCCGGGGAATTTGGGGGAAAAAATGGGAATTTT
TGGGAAATTCGGGCCAAAAAATCCGGGAATTTCGGGGCCAAAATCCGGAA
TTTCGGCCAAAAACCGGGAATTCCGGCCCCAAAATCCCGGGAAAATCCCG
GAANCCTGGGGGAATTTCGGGCCGAAATTCTGGGAATTCGATTTGGGGGG
AAAAATGGGGATTTGGGGGGGAAAATTGGGGAATTTGGGGGAAATTTGGG
GAATTTTGGGGGAAAAATGGGAAAATTTGGGGAAAAAATGGGGAATTTGG
GGAAAAATTGGGGGGAAATGGGGAATTTGGGGAGAATTTGGGGGAAAAAT
GGGAATTTGGGGAAAATTGGGAAATTTGGGGAAAAAATGGGGAAATTTGG
GGAATTGGGGGGAAATTTTGGGGAAGGAAATTTCGGGGAAAAATGGGAAT
TTCGGGGGAAATTCGGGAAAAANTGGGGATTTCGGGAAAAATGGGGAATT
NGGGAAAATTTGGGGGAAAATCGGGGAATTTCGGGGAAAACGGGAATTTG
GGGGAAANATGGGAAATTTGGGGGGAAAAATTTGGGGAAAAATGGGGATT
TTGGGGAATTTGGGAAAATGGGAATTTTGGGGAAAATCGGGAATTTGGGG
AAAATCGGAATTNTGGGAAAATTTGGGGGAAAATTTGGGGAATTTGGGAA
AATTGGGGGAAATTTTGGGAATTGGGGGAAATTCGGGGAAAAATGGGAAA
TTTCGGGGGAATTTCGGGAAATTTGGATTTGGGAAAACGGGAATTTGGGN
AAAAACTGGGAATTTCGGGAGAAAATCTGGAGAANTCGGGGAAAAATTTG
GGGAATTTTGGGGGAAAAATTTTTGGGAATGGGGGAAATTTGGGGAAAAA
TGGGGGGAAATTTGGGGGAAATTTGGGAAAAAANTGGGAATTTTGGGGAA
ATTCGGGGAAAATGGATTTTGGGGAAAATGGGATTGGGAAAATTCCGGGG
AAAAATGNGNAATTTTGGGGAATCGGGGATGGGAAATTTCTTGGGAATTT
GGGGAAAATTTCGGGGGAAAAATGGGAAATTTGGGGGGAATTCCAGCCCC
AGAATCCTGGAATTTCGGCCCCGAACCTTGAATTCCAGCCCGAAAATCCC
AGGGAAAAATCCAGGAAAA
>oenMel5-855#Unknown
GGTTTAGGATTTTTTTCCTTTTGTTTCTTTCTCTTATGGAATTTTNTCCC
ATNTGTTGCTAAGAAACAATAACGACCGGGTACTTAGGAGAGACAAAAGA
AGTGGCCACGGGAAGGGTGCAGCTGGCTGCTCTCTTNTCTGGGGGTTTCT
CTTGGAGGGGCAGAGAATTGGGCTAGGGGAAGAGGGGGCTGGGGCAGCTG
CTNGCTCTCTTGCTCTCTTGGCTTCGGAGGAGGACGGTCGAGCTGCTGCT
TGGGGGGGGAATTCGCTGCCGGAGCCCAGCCCNGCGCTGCTGTCTCCTGC
CGTGGGTGAGCCTCTGCTCGTGAGAGCAGCCATTGNACCGGGACCTTATT
AACACCCTGCCTCACTGGAAGGGGCCCTCACCATCTGCTCGGGTGCCTCA
GGGGAAAACCCGGGACCCCGACCCTCTCCTCCTTCCCGAGGGGCGTCTCC
CTGCAGCCGCTGCCGCTGCCCAGCCCCGCCGCTTTCTGCCACTGCTCCGG
GTTTTGCTACACTGTAGCCCGCACCCCTGCCTGCCGGGACGTCCCGCGGC
TCCNGCCGCAGCTGCGGAGTTTCTGNTACATCTCGTTTGCCACCCGGGGT
GTGCCCGCCTTGCCGTTCCTGCTGCAGCCATTTCTCCACGCAGCTCCTTC
CGCCA
>oenMel5-584#LTR/Gypsy
ACTGGCCCTGCTCCCTCCAGGAGCCAAGGGTGATCCCACAGGATCGCTGT
CAGAGGGAGGAAGGAGCATTTAGCTGTCAATGCTCTTCCCATGTGCAATG
CCAGTGTCTANTTCCGTGTGCTCTGTGCAGCCGNGAGAAGAGCAGAGAGG
GAAGGGAAGGGCCCAGGGCTGTGCCCCAGGGCTGTGCCTTGTGCGGCTCC
TTTGCCAGCCCCAGGCAGCCTGAGGATCTCCTGCAGTGCTGGGAGCTGTT
CTGTCCTGCCTTTCTTTGCAGATGAACCTATTGGGGAAGGTGATCTGGCT
ATCGAACCCACATTCAGGGAAGTGCCCCTGGGAGCTGGTGAGGGTAGGTC
AAGGCCTTTCCCCCTGGGGGAGCTGCCAGCTCAGAGCCCAAAGCTCGGCC
AGGGGGCATCGCTGCAGGTGCCAGGACAGAGCCGTGCTCGTGTGTGCCCT
CGCCCTGTGCAATCCCCTCACTGATCCTGCGACTCAGGCCCAGCAGTTCT
ACGTAAGTGAGGGCCCTGGCTCTGCGCTAAAAACCCGGATGTTTTTGAAC
CTTATTCCTTTATTTGGCGAGTTGCCAGCAGCAAAATCGGGAACGTTTCC
ATCTGATGCAACTCTACCTCTTCCTTTCTCAAGGGACTAGCCAAAAGACC
GTACAGGAGGAGACACTTCCCGGAGGAGGCAGTGGATCATTGGCAGCCCC
TGATGAATGAAGAAAAGTGATACCAACCACAGGCACAGGAACAGGAGGTA
ATTGCTGTGCCTCAGGCTCAGCCCTTGCCCTTGCACGGCCTGGCAGCAGC
CAAAGCTGGAGGCGCCTCGGCTTCGAGGCCTCTGGAGCTCGTTCCCAGCC
CCTGGGAAAGGGGACTCGTGCACCAAGGTCCCTCCTGCTGCAGCTGCTCC
CGAGGCTGCCCTGAGTGCCCAGAGGCCCAAGGCACAGGAGCAGCCCCGAG
CAGGAGCCCCGCCATGAGCCCAGGGCCACAGCCGGCCCTGGCTCCCGACT
GGGCAGGGGGTGCAATGGGTCGTGAAAGCAAGGACTTGACTCATTCCAGT
TCTTCACGTCTGTCCCCATCTGCCCCGNCTGCAGCCCTGTCTTGAGTGTG
TCCCAGCACCCACATCTCTGAAAAAAGAACCCCTGCCCCTGAGGACCCTG
GCCCTGCTCCCCAGCCTAGACTGAAGTTCGTCAGACCCTGTCCGCCAGGG
CAGGGCTTGGCAGATGTTTATATTCAAATAAAGAATTTGAGTGNTAACAG
CTATGTCCGGGTGGTGCCACCAGCAAAGCCCACACGGCACCAGCACTGGC
TGAGCTCCATGTCCAGGAGCAGCCATGGATGCCCACGGTGCGGGCAGGCA
GGAGCCAGGCAGGGGCTGCTGTGATCAGGGGCCCCGAGGGGCTGAGGGAG
CCCGTGCTGAGCGTCCCTGGGCTCAGGGCACATCTCCTTCCGTGGCATCA
TCTGGGCCTGCGCCTCCTCCAGGGCCATGCCCGGAAAAAGCGGGGAGGCG
TCGACGGCATCTCCAGGGACAGAGCCTGACCAGCAACGTCGGCAGGAAAA
AAAGGGTTTCGCTAAGCAATGGCCCTTTGATAAAGCAAAACATTTACAGC
CANGGCAGCCCATTCCTGCGGATAGGGGTACACTCCGNGGGTACAGCTAA
GGCCATGAGGTCACAGCAGGCTCTGGGGTGACAGCAGGCTGAGGTCACAG
CAGGCTCTGAGGTCACAGAGGTCCCAGAGCCCCGTGGTTGCACAGCACCA
CAGCCACCGACCACTCAGTCCTTGAGCACAACTGTTGCGGCAGCAGCGGC
GGCGGCGGCGGCAGTGGTGCTGACATTGGGACAGCGGTGGCAGCACAGCG
GTGGCAGCAAGAGCTGCGGGACTGGCAGAGGGCAAGGCACCATGGCCCTT
GCTCTGCGCCTCTTCCTCCTGCTCCTCCTGGCAGTGGCCCTGCCTGCCAG
GGCTGCCCAGGCAGCTCCGTGGCCAGCGCGGGGAGCAGGTGAGCCGGCGG
CCTGGCTCCCCTTTCCCGGGACAGCGCTCCCTTCTCCCCAGGAAGAGTTG
GGGATGGTTCTGCNTAGGGCTTTAGGGAGGCTTTCCTCTGTGGGAGGGAG
AGAGCCCCACAGGGGCCCTGGGCTGCTCCAGCCACCCATCCAGGGATGTT
GCACAGGGCGTGGAAAGAGTGTGCAGAGTGACCAGGGCCAGCCCAGAGCC
CCCCAGGCCCCTCTGCAACTCTGGCCATGTCCATTCACGTGTGGCTCCGA
CGGCCTTACCCGACACATACACATGAAGTGGAACTATTTTGCTCTAAGGT
CTACCAAGAGTCCANAGCCATGACACAGGAGACGAGAAATCCATGGAGGC
AGACAGACTTCTGGACCAGATGCTGAGCGANCTGGAGAGACGCCGTGGTG
GGTGCATTTCCCTCAGCCTTCTCCTGAGACTCAGCAGCCGGGGGCTTTCT
CTGCACATCTGGACACGCCGTGCCCGGCACAGCAGGAAGGGATCCATGGC
AGCCTGGCTGCCCCGGTGCTGCTGTCACACCCTGCAGGGCTGTTTCCCAG
CCTGGCCTGGCTGCAGCTTCTCCCCAGCCTCTGCAGGAAGGCCTTTGGCA
TCAGCTNACAGGGAGCNNAAAGTGCCCCATGGNCAATGCACACCCTGAGA
TCCCCTGAAATTTCCCAGTCTTGGNGTAGACCAGTAANGGCAGCTTTTTG
GAGANGGTTTGGGCNCTGGNAAATNCAGAAAATTTCTATGATTTCCTGAT
CCNTATCCATGACTCTGACAAGCATTNCTTCCTGTTGATGGCACCTCCCC
AATGNTGGAACGGATCNATCTNATCCACTTGTCCCTTCATCCAGCAATGA
AAGNAAAAACTGTGCTGAAGGCTCTGTTTGCCGGAGGAAGCAGTGGTTCT
GTTCCAGCCTCTGCTGCAGGAAGGGAGGCAATGCCAGGCACAGTCACAGG
AGGTAATTGCTGTGCCTCTGGGCCTGAGCNCTGCTGAGCCTTGAGCTGCC
GTCTCCGCTGCTGGGCAGATGCGGGCACAGCCCGGACAAGAGCGGCACAG
CCCAGAGGAATTATCCCGAGCAGGCTCAGGGCACTCGGGTGCTGAGCAGT
CCTGCTGGGCTCCCTCCGTGGGAGACACAGCCCAAAACCTGGGAGGGGCT
GCAAGGGGTGCCCATGGTGGGGAAANGGCAGAGGGGAGAGCAGGGCTCCA
GTGTGTCCTGACAGGGCCTGACTCTGTACCCTGGGGCAGGGGGAGCTGGC
CAAGTAGAAAGACGGAGAGAGGTTGGGAGGGATGGTTGCGTCACTGCCTG
CTGCAATTTTACCCAGGGATTTCNGGAGGATTTCCTCTCTGGGACTGACA
GAAGGGTGCTGCAACTGCCCCTCCAGGGTTGTTGCACAGGGCATGGACAG
AGCGAGCAGAGTGACCATGAGTCTGCCCAGAGCTCCCCAGGCCCCTCTGC
AGCTTTGGCCTTGTCCATTCATATCTGGGTCCTACAGCCTTCCCTGACCC
CCTTTGAAGTAGCCAGGTCCCTAGGGCAGAANGGGATCCCAGCACACCAT
GGAAATGCTTCTCATCTGTGCTCCCTTCTAGATGAGCGTGAGGTTCTCTC
AAGTAGCTCNGCTTCATGGAAGATTTTGCAGCCTCTGGAGCCTCCTGCAG
GTATGTTCTCACTCTTCCTCCAAGGAATAATAATTGACAACCTGGCAGGA
ACCACGTGACTGAAGCTTCTGTGGCTATTCAGTTACAGATGTGTCTGCAG
GGAAGGCTTTTCCCTAATCCCTCGGCGGATGCTACACAGGAGCCCAGTTC
CAATCCCAGGGGTGAGTAGTCTGTCTCTACTCNNCCCANAAGCTGAGCAC
TCCTTTTGTGGGATCCATTCCAGGAAAAATTNAAACACTTTNTCTTAAGG
TTCCCTGAGAAGGAAGAAGAAACCAACAGGAAACAGTGAGATCCAGGATG
ACTCCAATCTTCTGGACCAGATGCTGAGTGATCTGGAGATAAGCCGTGGT
GGGTGCATTTCCCTCAGCCTTCTCCTGAGACTCAGCAGCCGGGGGCTTTC
TCTGCACATCTGGACATGCCGTGCCCGGCACAGCGGGAAGGGATCCATGG
CAGCCTGGCTGCCCTGCTGCTGCTGTCACACCCTGCAGGGCTGTTTCCCA
GCCTGGCCTGGCTGCAGCTTCTCCCCAGCCTCTGCAGGAAGGCCTTTGGC
ATCAGCTNACAGGGNGCNNANANTGCCCCANGGGCCATGCACATCCTGAG
ATCCCCTGAAATTTCCTGGCGTCCNAGNACATGAGGAGGGGCAGCTGTTT
GGAGAAGGGGGGCCCTGGCCAGTCCCATAACCTGGCCTTTATCCTGATCC
TTGTAACCTGGCCTTTATCCTGATCCTTATCAATANCTATGACAAGCATT
GCCTCCTGAAGGTGGCACCTCCCCANTGGGAAAGAACTCTTTCTGATCNA
GCTGTCCCTTTCCCTTTCTCCAGANATNGAAGGAGAGGCTGNGCTGGTGG
CTCCGATTCCCAGAGGAAGCAGTGGCTCTGTGCCAGTCTCTGCTGCAGGA
AGGGAGGCGATGCCAGGCACAGTCACAGGAGGTAACTGCTGTGCCTCTGG
GCCTGANCCCTGCTGAGCCTTGAGCTGCCATCNTGGCTGCCTCCCTGCCA
GGGATGTTGCACAGGGCCTGCAAACAGTGTGCAGAGTGACCAGAACCAGC
CCAGAGCTCCCCAGGCCCCTCTGCAGCTTTGGCCATGTCCATTCACGTCT
GGATCCCACAGCCTTACCTGACCCCCTTGCAGTGCCCAGGTCCCTAAGGC
AGAAGGGGATCCCAGCACACCATGGCAATGCTTCTGATCTGTGCTCCCGT
CTTGGNTGGGATTGGGACATGGGTTATTTAGAAAATCTGGTGAATGGCNG
TGTGAAGATTCTAGAGCATGGTGGAGGCAAGTTCTCAGTGTGCCTTTCCT
GACAGAATAATCTGTGTCACTTTGGCAAGGGCTCACTCCTGTGATGATTC
CCTTTACATATTGTCAGGCTTGATGGATTCTGGTATCCTTGCCNTGCTCC
CCTCTGGAGCCCTGGGTGATCCCACAGGATTCCTGTCAGTGGGAGGAAGG
AGCATTTAGCTGTCAATGCTCTTCCCATGTGCAATGCCAGTGCCTCCTTC
CGTGTGCTCTGTGCAGCCCCAGAGAGAGCAGAAAGGGAAGGGAAGGGCCC
AGTGCCCGTCCCAGGGCTGTGCCTTGTGTGGCTCCTTTGCCGGCCCAGGC
AGCCTGAGCTGCTGCCAAGCCCTGGCCCTCACTGGGGCTGGGTTCAGGGC
TGCTGGAATCTCCAGGGAGTCNTTTCTCCCCTGACTGCCCTGCAGGAGGC
TCCTTCCATCCCAGTGTGGGGCCACTGCGGGAATGTGCTGCCTCTGCCCC
TGATCCTGAACAGNAGGGAGAGCTGGGGGAGTGCCTTGGAGCACTCACTG
CAGTCACTGCCACTGCAGCCTGAATGAGAAATGGAACTGCTTTCCATTAA
GGTCCTCCTGGTTGGAACAACCCAAGANATAGGAGACAAGANATCNCTGG
AGGCNGACAGACTTCTGGANNAGATGCTGANTGATCTGGAGAGACGCCGT
GGTGGGTGCATTTCCCTCAGCCTTCTCCTGNGNCTCAGCAGCCGGGGGCT
CTCCCTGCACATCTGGACACGCCGTGCCCGGCACAGCGGGAAGGGATCCA
TGGCAGCCTGGCTGCCCTGNTGCTGCTGTCACACCCTGCAGGGCTGTTTC
CCAGCCTGGCCTGGCTGCAGCTTCCCCCCAGCCTCTGCAGGAAGGCCTTT
GGCATCAGCTCACAGGGAGCACAAAGTGCCCCACGGGCCATACACACCCT
GAGATCCCTGAATTTCCCAGTCTCGGGGTAGACCAATAAGGGCGGCTTTT
TGGAGAAGTTGGGCCCTGGCAAATACAGAAAATTTCTATGATTTCCTGAT
CCTTATCCATGACTCTGACAAGCATTNCTTCCTGTTGATGGCACCTCCCC
AATGNTGGAACGGATCNATCTNATCCACTTGTCCCTTCATCCAGCAATGA
AAGNNAAGACTGTGCTGANGGCTCTGTTTNCCNGAGGAAGCAGTGGTTCT
GTTCCAGCCTCTGCTGCAGGAAGGGAGGCGATGCCAGGCACAGTCACAGG
AGGTAATTGCTGTGCCTCTGGGCCTGAGCCCTGCTGAGCCTTGAGCTGCC
ATCTCTGCTGCTGGGCAGAGCGGGCACAGCCCGGACAAGAGCGGCACAGC
CCAGAGGAATTATCCCGAGCAGGCTCAGGGCACTCGGGTGCTGAGCAGTC
CTGCTGGGCTCCCTCCGTGGGAGACACAGCCCAAAACCTGGGAGGGGCTG
CAAGGGGTGCCCATGGTGGGGAAANGGCAGAGAGGGAGAGCAGGGCTCCA
GTGTGTCCTGACAGGGCCTGACTCTGTACCCTGGGGCAGGGGGAGCTGGC
CAAGTAGAAAGACGGAGAGAGGTTGGGAGGGATGGTTGCGTCACTGCCTG
CTGCAATTTTACCCAGGGATTTCGGGAGGATTTCCTCTCTGGGACTGACA
GAAGGGTGCTGCAACTGCCCCTCCAGGGTTGTTGCACAGGGCATGGACAG
AGCGAGCAGAGTGACCATGAGTCTGCCCAGAGCTCCCCAGGCCCCTCTGC
AGCTTTGGCCTTGTCCATCCATATCTGGGTCCTACAGCCTTCCCTGACCC
CCTCTGAAGTAGCCAGGTCCCTAGGGCAGAANGGGATCCCAGCACACCAT
GGAAATGCTTCTCATCTGTGCTCCCTTCTAGATGAGCGTGAGGTCTCTCA
AGTAGCTCGGCTTCATGAAGATTTGCAGCCTCTGGAGCCTCCTGCAGGTA
TGTTCTCACTCTTCCTCCAAGGAATAATAATTGACAACCTGGCAGGAACC
ACGTGACTGAAGCTTCTGTGGCTATTCAGTTACAGATGTGTCTGCAGGGA
AGGCTTTTCCCTAATCCCTCGGCGGATGCTACACAGGAGCCCAGTTCCAA
TCCCAGGGGTGAGTAGTCTGTCTCTACCCACCCCACAAGCTGAGCACTCC
TTTTGTGGGATCCATTCCAGGAAAAATTNAAACACTTTNTCTTAAGGTTC
CCTGAGAAGGAAGAAGAAACCAACAGGAAACAGTGAGATCCAGGATGACT
CCAATCTTCTGGACCAGATGCTGAGTGATCTGGAGATANGCCGTGGTGGG
TGCATTTCCCTCAGCCTTCTCCTGAGACTCAGCAGCCGGGGGCTTTCTCT
GCACATCTGGACACGCCGTGCCTGNCACAGCGGGAAGGGATCCATGGCAG
CCTGGCTGCCCTGNTGCTGCTGTCACACCCTGCAGGGCTGTTTCCCAGCC
TGGCCTGGCTGCAGCTTCTCCCCAGCCTCTGCAGGAAGGCCTTTGGCATC
AGCTNACAGGGNGCNNANANTGCCCCANNGGCCACGCACATCCTGAGATC
CCCTGAAATTTCCTGGCGTCCNAGNACATGAGGAGGGGCAGCTGTTTGGA
GAAGGGGGGCCCTGGCCAGTCCCATAACCTGGCCTTTATCCTGATCCTTA
TCAATANCTATGACAAGCATTGCCTCCTGAAGGTGGCACCTCCCCAGTGG
GAAAGAACTCTTTCTGATCNAGCTGTCCCTTTCCCTTTCTCCAGAGATTG
AAGAAGAGACTGGNCCGGCGGCTCCGATTCCCAGAGGAAGCAGTGGCTCT
GTGCCAGTCTCTGCTGCAGGAAGGGAGGCGATGCCAGGCACAGTCACAGG
AGGTAACTGCTGTGCCTCTGGGCCTGAGTCCTGCTGAGCCTTGAGCTGCC
ATCTGGCTGCCTCCCCGCCAGGGATGTTGCACAGGGCCTGCAAACAGTGT
GCAGAGTGACCAGAACCAGCCCAGAGCTCCCCAGGCCCCTCTGCAGCTTT
GGCCATGTCCATTCACGTCTGGATCCCACAGCCTTACCTGACCCCCTTGN
AGTGCCCAGGTCCCTAGGGCNGAAGTGGATCCCAGCACACCATGGCAATG
CTTCTGATCTGTGCTCCCATCTTGGCTGGGATTGGGACATGGGTTATTTA
GAAAATCTGGTGAATGGCNGTGTGAAGATTCTAGAGCATGGTGGAGGCAA
GTTCTCAGTGTGCCTTTCCTGACAGAATAATCTGTGTCACTTTGGCAAGG
GCTCACTCCTGTGATGATTCCCTTTACATATTGTCAGGCTTGATGGATTC
TGGTATCCTTGCCNTGCTCCCCTCTGGAGCCCTGGGTGATCCCACAGGAT
TCCTGTCAGTGGGAGGAAGGAGCATTTAGCTGTCAATGCTCTTCCCATGT
GCAATGCCAGTGTCTCCTTCCGTGTGCTCTGTGCAGCCCCAGAGACGAGC
ANAAAGGGAAGGGAAGGGCCCAGGGCTCTGTCCCANGGCTGTGCCTTGTG
TGGCTCCTTTGCCGGNCCCAGGCAGCCTGAGCTGCTGCCAAGCCCTGGCC
CTCACTGGGGCTGGGTTCAGGGCTGCTGGNANCTCCAGGGAGTCNTTTCT
CCCCTGACTGCCCTGCAAGAGGCTCCTTCCATCCCAGTGTGGGGGCCACT
GCGGGAATGTGCTGCCTCTGCCCCTGATCCTGAACAGNAGGGAGAGCTGG
GGGAGTGCCTTGGAGCACTCACTGCAGTCACTGCCACTGCAGCCTGAATG
AGAAATGGAACTGCTTTCCATTAAGGTCCTCCTGGTTGGAACAACCCAGA
NATAGGAGACAAGAAATCNCTGGAGGCNGACAGACTTCTGGANNAGATGC
TGANTGATCTGGAGANANGCCGTGGTGGGTGCATTTCCCTCAGCCTTCTC
CTGNGNCTCAGCAGCCGGGGGCTTTCTCTGCACATCTGGACACGCCGTGC
CCGGCACAGCGGGAAGGGATCCACGGCAGCCTGGCTGCCNCTGCGCTGCT
GTCACACCCTGCAGGGCTGTTTCCCAGCCTGGCCTGGCTGCAGCTTCTCC
CCAGCCTCTGCAGGAAGGCCTTCGGCATCAGCTCACAGGGAGCNNAAAGT
GCCCCACAGGCCATGCACACCCTGAGATCCCCTGAAATTTCCCGGTCTCG
GGGTAGATCAGTAAGGGCAGCTTTTTGGAGAAGGGGGCCNTGGAAAATCA
GAAAANTTNTATGATTTCCTGATCCATATCCATGACTTTGACAAGCATTG
CTTCCTGTTGACGGCACCTCCCCAACGGGGAACGGATCCGTCTNATCCAN
TTGTCCCTTCATCCAGCAATGAAAGTAAAAACTGTGCTGAAGGCTCTGTT
TCCCGGAGGAAGCAGTGGTTCTGTTCCAGCCTCTGCTGCAGGAAGGGAGG
CGATGCCAGGCACAGTCACAGGAGGTAATTGCTGTGCCTCTGGGCCTGAG
CCCTGCTGAGCCTTGAGCTGCCATCTCTGCTGCTGGGCAGAGCGGGCACA
GCCCGGACAAGAGCGGCACAGCCCAGAGGAATTATCCCGAGCAGGCTCAG
GGCACTCGGGTGCTGAGCAGTCCTGCTGGGCTCCCTCCGTGGGAGACACA
GCCCAAAACCTGGGAGGGGCTGCAAGGGGTGCCCATGGTGGGGAAANGGC
AGAGAGGGAGAGCAGGGCTCCAGTGTGTCCTGACAGGGCCTGACTCTGTA
CCCTGGGGCNGGGGGAGCTGGCCAAGTAGAAAGACGGAGAGAGGTTGGGA
GGGATGGTTGCGTCACTGCCTGCTGCAATTTTACCCAGGGATTTCNGGAG
GATTTCCTCTCTGGGACTGACAGAAGGGTGCTGCAACTGCCCCTCCAGGG
TTGTTGCACAGGGCATGGACAGAGCGAGCAGAGTGACCATGAGTCTGCCC
AGAGCTCCCCAGGCCCCTCTGCAGCTTTGGCCTTGTCCATCCATATCTGG
GTCCTACAGCCTTCCCTGANCCCCTTTGAAGTAGCCAGGTCCCTAGGGCA
GAAGGGGATCCCAGCACACCATGGAAATGCTTCTCATCTGTGCTCCCTTC
TAGATGAGCGTGCTTGGAAGGTTTCTCAAGTAGCTCGGCTTCATGAAGAT
TTGCAGCCTCTGGAGCCTCCTGCAGGTATGTTCTCACTCTTCCTCCAAGG
AATAATAATTGACAACCTGGCAGGAACCACGTGACTGAAGCTTCTGTGGC
TATTCAGTTACAGGTGTGTCTGCAGGGAAGGCTTTTCCTAATCCCTCGGC
GGATGCTACACAGGAGCCCAGTTCCAATCCCAGGGGTGAGTAGTCTGTCT
CTACTACCCCACAAGCTGAGCACTCCTTTTGTGGGATCCATTCCAGGAAA
AATTGAAACACTTTNTCTTAAGGTTCCCTGAGAAGGAAGAAGAAACCAAN
AGGAAACAGTGAGATCCAGGATGACTCCAATCTTCTGGACCAGATGCTGA
GTGATCTGGAGATACGCCGTGGTGGGTGCATTTCCCTCAGCCTTCTCCTG
AGACTCAGCAGCCGGGGGCTTTCTCTGCACATCTGGACACGCCGTGCCCG
GCACAGCGGGAAGGGATCCATGGCAGCCTGGCTGCCCTGCTGCTGCTGTC
ACACCCTGCAGGGCTGTTTCCCAGCCTGGCCTGGCTGCAGCTTCTCCCCA
GCCTCTGCAGGAAGGCCTTTGGCATCAGCTCACAGGGAGCNCAAAGTGCC
CCATNGGCCACGCACATCCTGAGATCCCCTGAAATTTCCTGACGTCCGAG
NANATGAGGAGGGGCAGCTGTTTGGAGAAGGGGGGCCCTGGCCAGTCCCA
TAACCTGGCCTTTATCCTGATCCTTATCAATATCTATGACAAGCATTGCC
TCCTGNANGTGGCACCTCCCCAGTGGGAAAGAACTCTTTCTGATCNAGCT
GTCCCTTTCCCTTTCTCCAGAGATTGAAGAAGAGACTGGNCTGGCGGCTC
CGATTCCCAGAGGAAGCAGTGGCTCTGTGCCAGTCTCTGCTGCAGGAAGG
GAGGCGATGCCAGGCACAGTCACAGGAGGTAACTGCTGTGCCTCTGGGCC
TGANCCCTGCTGAGCCTTGAGCTGCCATCNTGGCTGCCTCCCTGCCAGGG
ATGTTGCACAGGGCCTGCAAACAGTGTGCAGAGTGACCAGAACCAGCCCA
GAGCTCCCCAGGCCCCTCTGCAGCTTTGGCCATGTCCATTCACGTCTGGA
TCCCACAGCCTTACCTGACCCCCTTGCAGTGCCCAGGTCCCTAGGGCAGA
AGGGGATCCCAGCACACCATGGCAACGCTTCTGATCTGTGCTCCCATCTT
GGTTGGGATCGGGACATGGGTTATTTAGAAAATCTGGTGAATGGCCGTGT
GAAGATTCTAGAGCATGGTGGAGGCAAGTTCTCAGTGTGCCTTTCCTGAC
AGAATAATCTGTGTCACTNTGGCAAGGGCTCACTCCTGTGACGATTCCCT
TTACATATTGTCAGGCTTGATGGATTCTGGTATCCTCGCCCTGCTCCCCT
CTGGAGCCCTGGGTGATCCCACAGGATTNCTGTCAGTGGGAGGAAGGAGC
ATTTAGCTGTCAATGCTCTTCCCATGTGCAATGCCAGTGTCTCCTTCCGT
GTGCTCTGTGCAGCCCCGGAGAAGAGCAGAAAGGGAAGGGAAGGGCCCGG
TGCTCTGTCCCAGGGCTGTGCCTTGTGTGGCTCCTTTGCCGGCCCCAGGC
AGCCTGAGCTGCTGCCAAGCCCTGGCCCTCACTGGGGCTGGGTTCAGGGC
TGCTGGAATCTCCAGGGAGTCNTTTCTCCCCTGACTGCCCTGCAGGAGGC
TCCTTCCATCCCAGTGCGGGGCCACTGCGGGAATGTGCTGCCTCTGCCCC
GATCCTGAGCGGAAGGGAGAGCTGGGGGAGTGCCTTGGAGCACTCACTGC
AGTCACTGCCACTGCGGCCCGAATGAGAAATGGAACTACTTTCCATTAAG
GTCCTCCTGGTTGGAACAACCCAGACATAGGAGACAAGAAATCCCTGGAG
GCCGACAGACTTCTGGACAAGATGCTGAGTGATCTGGAGAGACGCCGTGG
TGGGTGCATTTCCCTCAGCCTTCTCCTGTGTCTCAGCAGCCGGGGGCTTT
CTCTGCACATCTGGACACGCCGTGCCCGGCACAGCGGGAAGGGATCCATG
GCAGCCTGGCTGCCCCGGTGCTGCTGTCACACCCTGCAGGGCTGTTTCCC
AGCCTGGCCTGGCTGCAGCTTCTCCCCAGCCTCTGCAGGAAGGCCTTTGG
CATCAGCTCACAGGGAGCAAAAAGTGCCCCACGGGCCATNCACACCCTGA
GATCCCCTGAAATTTCCCGGTCTTGGGGTAGATCAGTAAGGGCAGCTTTT
TGGAGAAGGTTGGGCCCTGGAAAATNCAGAAAATTTNTATGATTTCCCGA
TCCATATCCATGACTTTGACAAGCATTGCTTCCTGTTGATGGCACCTCCC
CAATGGGGAACGGATCCATCTGATCCGNTTGTCCCTTCATCCAGCGATGA
AAGGAAAGACTGTGCTGAAGGCTCTGTTTGCCCGAGGAAGCAGTGGTTCT
GTTCCAGCCTCTGCTGCAGGAAGGGAGGCAATGCCAGGCACAGTCACAGG
AGGTAATTGCTGTGCCTCTGGGCCTGAGCCCTGCTGAGCCTTGAGCTGCC
ATCTCTGCTGCTGGGCAGAGCGGGCACAGCCCGGACAAGAGCGGCACAGC
CCAGAGGAATTATCCCGAGCAGGCTCAGGGCACTCGGGTGCTGAGCAGTC
CTGCTGGGCTCCCTCCGTGGGAGACACAGCCCAAAACCTGGGAGGGGCTG
CAAGGGGTGCCCATGGTGGGGAAANGGCAGAGAGGGAGAGCAGGGCTCCA
GTGTGTCCTGACAGGGCCTGACTCTGTACCCTGGGGCTGGGGGAGCTGGC
CGAGTAGAAAGACGGAGAGAGGTTGGGAGGGATGGTTGCGTCACTGCCTG
CTGCAATTTTACCCAGGGATTTCGGGAGGATTTCCTCTCTGGGACTGACA
GAAGGGTGCTGCAACCGCCCCTCCAGGGTTGTTGCACAGGGCATGGACAG
AGCGAGCAGAGTGACCATGAGTCTGCCCAGAGCTCCCCAAGCCCCTCTGC
AGCTTTGGCCTTGTCCATTCATATCTGGGTCCTACAGCCTTCCCCGACCT
CCCTTGCTGTGGCCAGTTCCCTAAGGCAGAAAGGGGATCACAGCACACCA
TGGAAATGCTTCTGATCTGTGCTCCCTTCTAGGTGAGCATTCTGGGAGGT
CTTCTCGAGNAGNTCGGGTTCAGTGGAAGATGGTTTGGAACTCTTGGGTG
CTTCTGCAGGTAAGTTCTCANTCTTCCATCCATGGCATAATNATTGACAA
CCTGGCAGGAACCGGGTGACAGAAGCTTCTGTGGCTATTGAGTTACAGGT
GTGTCTGCAGGGAGCACTTTCCCAATCCCTNGGCTGGATGCTGTACAAAA
GCCCAGCTCCCATCGCAGGGGTGAGTAGTNTGTCCCTGCTGANCCCACAA
GCTGAGCACTGCTTTTGTGGGATCCACCCACATGAAGAATTGGAACTACT
TTGCTTTAAGGTCCTCCGACAGGCAAGGCCCAAGAAACCAATGGGAGACA
ATGAAATCCCTGGAAGCCGACAGACTTCTGGACAAGATGCTGAGTGATCT
GGAGAGACGCCGTGGTGGGTGCATTTCCCTCAGCCTTCTCCTGAGACTCA
GCAGCCGGGGGCTTTCTCTGCACATCTGGACACGCCGTGCCCGGCACAGC
GGGAAGGGATCCATGGCAGCCTGGCTGCCCCGNTGCTGCTGTCACACCCT
GCAGGGCTGTTTCCCAGCCTGGCCTGGCTGCAGCTTCTCCCCAGCCTCTG
CAGGAAGGCCTTTGGCATCAGCTCACAGGGAGCTCACACTGCCCCACGGG
CCATNCACACCCTGAGATCCCCTGAAATTTCCTGGTCTCCNAGCACATCA
GAAGGGGCAGCTGTTTGGAGGAGGGGGGCCCTGGCCAGTCCCAATAACCT
GGCCTTTNTCCTGATCCTTATCNATGTCTTTGACAAGCATTGGCTCCTGA
AGGTGGCACCTCCCCAGTGGGGAANAACTCCATCTGATCCAGCTGTCCCT
TTTCCTTTCTCCAGAGATGGAAGAAGAGACTGTGCTGAAGGCTCCGTTTC
CCAGAGGAAGCAGTGGCTCTGTTCCAGCCTCTGCTGCAGGAAGGGAGGCG
ATGCCAGGCACAGTCACAGGAGGTAATTGCTGTGCCTCTGGGCCTGAGCC
CTGCTGAGCCTTGAGCTGCCATCTCTGCTGCCTCCCTGCCAGGGATGTTG
CACAGGGCCTGCAAACAGTGTGCAGAGTGACCAGAGCCAGCCCAGAGCTC
CCCAGGCCCCTCTGCAGCTTTGGCCACGTCCATTCACGTCTGGATCCCAC
AGCCTTACCTGACCCCCTTGNAGTGCCCAGGTCCCTAGGGCNGAAGNGGA
TCCCAGCACACCATGGNANTGCTTCTGATCTGTGCTCCCATCTTGGTTGG
GATTGGGACATGGGTTATTTAGAAAATCTGGTGAATGGCAGTGTGAAGAT
TCTAGAGCATGGTGGAGGCAAGTTCTCAGTGTGCCCTTCCTGACAGAATA
ATCTGCGTCACTTTGGCAAGGGCTCACTCTTGTGATGATTCCCTTTACAT
ATTGTCAGGCTTGATGGATTCTGGTATCCTTGCCATGCTCCCCTCTGGAG
CCCTGGGTGATCCCACAGGATTCCTGTCAGTGGGAGGAAGGAGCATTTAG
CTGTCAATGCTCTTCCCATGTGCAATGCCAGTGCCTCCTTCCGTGTGCTC
TGTGCAGCCCCAGAGACGAGCAGAAAGGGAAGGGAAGGGCCCGGGGCTCT
GTCCCGCGGCTGTGCCTTGCGTGGCTCCTTTGCCAGACCCGGGCAGCCTG
AGCTGCTGCCAAGCCCCGGCCCTCACTGGGGCTGGGTTCAGGGCTGCTGG
NANCTCCAGGGAGTCNTTTCTCCCCTGACTGCCCTGCAAGAGGCTCCTTC
CATCCCAGTGTGGGGCCACTGCGGGAATGTGCTGCCTCTGCCCCTGATCC
TGAGCGGAAGGGAGAGCTGGGGGAGTGCCTTGGAGCACTCACTGCAGTCA
CTGCCACTGCAGCCTGAATGAGAAATGGAACTACTTTCCATTAAGGTCCT
CCTGGTTGGAACAACCCAGACATAGGAGACAAGAAATCCCTGGAGGCCGA
CAGACTTCTGGACAAGATGCTGAGTGATCTGGAGAGACGCCGTGGTGGGT
GCATTTCCCTCAGCCTTCTCCTGAGACTCAGCAGCCGGGGGCTTTCTCTG
CACATCTGGACACGCCGTGCCCGGCACAGCGGGAAGGGATCCATGGCAGC
CTGGCTGCCCCGTGCTGCTGTCACACCCTGCAGGGCTGTTTCCCAGCCTG
GCCTGGCTGCAGCTTCTCCCCAGCCTCTGCAGGAAGGCCTTTGGCATCAG
CTGACGGGGAGCNCAAAGTGCCCCACAGGCCATNCACACCCTGAGATCCC
CTGAAATTTCCCGGTCTCGGAGTAGATCAGAAGGGGCGGCTGTTTGGAGG
AGAGAGGCCCTGGCNAGCCCTAAAACTTCTGGTTTCCTGATCCTTATCCA
TGTCTCCGACAAGCATTNNTTCCTGANGACGNCACCTCCCTGATGGGGAA
CGGCTCCATCTGATCCAGCTGTCCCTTCTCCAGNGATGAAAGGAAAGACT
GTGCTGAAGGCNNCGTTTCCCGGAGGAAGCAGTGGTTCTGTTCCAGCCTC
TGCTGCAGGAAGGGAGGCGATGCCAGGCACAGTCACAGGAGGTAATTGCT
GTGCCTCTGGGCCTGAGCCCTGCTGAGCCTTGAGCTGCCATCTCTGCTGC
TGGGCAGAGCGGGCACAGCCCGGACAAGAGCGGCACAGCCCAGAGGAATT
ATCCCGAGCAGGCTCAGGGCACTCGGGCGCCGAGCAGTCCTGCTGGGCTC
CCTCCGTGGGAGACACAGCCCAAAACCCGGGAGGGGCTGCAAGGGGTGCC
CATGGTGGGGAAAGGGCAGAGGGGAGAGCAGGGCTNCAGTGTCTCCTGAC
AGGGCCTGACTCTGTCCCCTGGGGCTGGGGGAGCTGGCCAAGCAGAANGA
GGGAGGGAGGTTGGGAGGNATGGTTGCGGCACTGCCTGCTGCAATTTTCC
GCAGGGATTTNTGGCGGGTTTCCTGTCTGGGACTGACAGAACCAGGGGTC
CTGGGCGCTGCAACCGCCCNTCCAGGGATGTTGCACAGGGCATGGAAAGA
GCGNGCAGAGTGACCAGAGCCAGCCCAGAGCTCCTCAGGCCCCTCTGCAG
CTTTGGCCATGTCCATTCACATCTGGCTCCCACAGCCTTACCCGACCCCC
TTGCAGTGCCAGGNCCCTAGGGCAGAAGGGGATCCCAGCACACCATGGAA
ACGCTTCTCATCTGTGCTCCCTTCTAGATTGGGATCGCGACGTGAGGTTA
CTCGGAGAGCTCGNTGAATGACGATTTGAAGATTCTGGAGCNTGCTCGAG
GCAAGTTCTCACTGTTCCTTTCCTCCAAGGAATAATCAGTGTCACCGTGG
CAAGAGCTCACCTGTGACTGAAGCTTCTGTGGCTATTCAGTTACAGATGT
GTCTGCAGGGAAGGCTTTTCCTAATCCCTTGGCGGATGCTACACAGGAGC
CCAGTTCCAATCCCAGGGGTGAGTAGTCTGTCTCTACTCTACTCAGAAGC
TGAGCACTCCTTTTGTGGGATCCATTCCAGGAAAAATTGAAACACTTTAT
CTTAAGGTTCCCTGAGAAGGAAGAAGAAACCAATAGGAAACAGTGAGATC
CAGGATGACTCCAATCTTCTGGACCAGATGCTGAGTGATCTGGAGATAAG
CCGTGGTGGGTGCATTTCCCTCAGCCTTCTCCTGAGACTCAGCAGCCAGG
GGCTTTCTCTGCACATCTGGACACGCCGTGCCCAGCACAGCGGGAAGGGA
TCCATGGCAGNCTGGCTGTGCTGACCCCTGTTCTGCTNCTGTCNCACCCT
GCAGGGCTGTTTCNCAGNCTGTGCCATGGCTGCAGCTTCCCTTCNCCAGC
CTCTGCAGNAAGGCCTTTGGCATCAGCTGACAGTGGAGCGNAAAGTGCCC
CAGGGGCCATGC
>oenMel5-923#LTR/ERVL
GACTTTCTGAAATTATTTCTTTTACCGTTTGTCAGAGACTGAAATGGTTC
ATGNCTTAAACATTGTTATGAAGGACTTTTGCCCATTATAGCAAAACTGT
ATAAAGAAGCTGCGACCACCGAAGCCCACCCCTCCCTGAANATGCCTCCT
GACTGGAACCTTGGACTGCGAGTTAAGCCGCCTAAGGGAACTGAGATAAG
ATAAAGGTGACACTNCTTCAATCATCTNAGGTCTAGGGAGAAGGTTCGCA
CAGACTTCCTCCCCCAACCAAGGGGGGAGGAGGAGAGTTTTGGGTGTGTG
GNANAACCTCTGGTCAGAGGCAGTGAACGCCCATCCTCCCTTACGCAAAC
CGGCCCAGCTGTGGAACCCCCCACCCCAGGAAAGCCACATCCACGGGACA
TTCACGTGAGGGGCAGCTGAGGGGGTGTCATAATCCATCAAAGGCCCCCC
AAAGGGGTCCCCAGAGCCTTGCACCAGAGCACTGCACGTGATGCAAAGAC
CAACAGATCCAAGTCTGCTGCAAGGGACAGTGTCAAACTTGCCCCCCCCG
GGGAGGCACCTGGGCGTTCCCACCTGGCCCGAACGTATATTAATCCATNG
GATTCTGTGTTTTCGGGGGGACCCTCACCACCAAGAAGACCAGATGGAGA
GGANCAACGGGACGTCGTTGGGACCCNCGGAGGGGTGATATTTTCTACTT
AATCTGTCTCTGTCACTCTCTTCCTGTCCCCCCACCTCTTTTCTCTTTCT
TTCTCTTTCTTTCTCTCTGCCTCTTTCATTTACTATTAAATAAAATCCAT
ATTATTGGCNCCGGCATNTGGCCTCGTTTGCGCTTTAATTCGGGCAGAGG
CATTTCTAATAATTTTAAAAACCGGATCNTAACACCCATGTAGTATATAT
TTTCCAACCAGCAGAGAAA
>oenMel5-2878#LTR/ERVK
AAATACTGAACGAGTTTGGGCCACAGTGGACATGTCTGAACAAGTCCAGG
CCGTGCTCTGTATCGTGTGCACCAGCCAAACTATATTTAGCTGTTTTTCT
CCATATTTTGCTGCCTAGTTGTTTTTCTGCATATTTTGCTGTTTCTTCAC
ACGCTTAGCTGTTTTTCTGTATATTTCTTAGTTTAGACCAATGTTTATAA
CAAGTGCACGGGATAAGCCATTTTTAAGTGTTTTTCTACAACTTGTTGAA
ACCCTTCAAGGCCACTGAAACATAAATTGTGCTAATCGGAAAAAAAGAGC
TAAAAAACAGAATACCAAGATTAGAAGACCCAAGATAAAAGTGGGCGGCG
AAGTTCTAGACAGCCACCAATCATCGTACCTGAAGAGCTCGTGCAAAGCG
CGTGAACAGCATAAAAGCACCAATCGAAAAATGCGTAATCACATGGACGG
TAGTCTTAAAATGTATAATTAAAGCTAAAANGTAAACAATAAATCGGCTT
CTGCATAATCATATTGATTTGCTGTCCAGAAGTCCTGTTT
>oenMel5-1624#LINE/CR1
ATTTATCAAAGACAGATCGCGCCAGACTAGCCCGATANCTTTCTTTGATA
AGATAACTGATTTTCTAGACAAGGGAAATGCGGTAGATCTAATCTATCTG
GACTTCAGTAAAGCATTTGATACGGTGCCACATGGGAAATTATTAGTTAA
GNTGGAGAAGATGAAGATTGTACAAAATNTNTAACGCGGGGAAGTGAAGG
CTACAGGGAGACGACAAGTTGATGCTGAGAGGAGATTGTCGANCTGGAGG
GAGGGNACTAGGGAAACTCCTCAAGGATCGGTTTTGGAGCCGATCTTATT
TAATATTTTCATTAACGACCTTGGCACAAAAGAGTAGGAGCGTGCTAATG
AAATCTGCTGATGGACAAAAGCTGGGAGACANTATCAATACAGAGGAGGA
TTAGAATATCGTGCAAAGGGAGCTGNGTGACCTTGAGGACTGGAGTAATA
AAAATGGAACGAAATNCAGG
>oenMel5-1405#LINE/CR1
CCATGCACATCCGGGGGGTTTCCATTTCCCAGTGGGCCCATTGTTAAGGG
TATGGAGCACATCTGGGAGATGGGATTTTCATCGCGACANATTCCCATCT
CCTCATTTTTTCAACTGCTCTTTTAACAACNCCTTCATCTGTTCAATCAA
TNCTGCAGCTTGTGGATAGTCTGNTATATGAAAAACCCAGCAGTCTTTCA
CTTTNTTTTCCACAGGAACGGACAAAGCATTCCACATCCTAGTGTCAGCA
AACCCTATAAAAACAGCCAATTTCATCCNTTCCTCCTTCGTTCGTTGTAT
ACAATCTCACAGAGTTCACCAGTGACGTTTGNGTCCTGGCCAATNATTTT
CTGTAGGTATTTAGTGTTACATCCCTGAGCAGCCAAAGCTAANANATTAG
TACTGCGAGCGTTATTTCACAATGTCATTATATATATGTGAAAGTATATA
TTTAATTTCTTTATTACATATATATATATAATTTTATTATATTATTATTC
TTTCCTTNGCACAAAGAGTCCAAGCTCAAGATTAAAACCTTTTCTGTTGC
TCCACGTCGGAGCGTTTCGACAGCAATCGTTCTCTCTGTTNGTGCTGTTT
CTAGGATGCTGTTAACAAAATTCATCCTCGTCTTCCCAAACCCACAAGTT
CTTTTCCTTTTTCCATATGCAACTTTTGGATNTGNTTTAAGACATCCAGT
GGTTCAGCCTCTTTCAGCTGACTNCCCCACTGCTNNCANAGTGCTCCGAC
CTCAGCCCACTNCAGAGACCAGCGAACTCTAGGNAAGGGCTTTNCCTATA
CCCGGGAATTTNGGACGGGNCTGATTCCTTACATTTANATTTAAAAANTG
ACATTTTGTNGTGATCCAGCCAGNCGACGCCGACTTTGTTTTGCCAGTGG
GCAGGGTCAGCGACAGAGACACAGACACCAACTNAAGGAATCAGTGTAAT
TTACTGTAGTTCAAAGCAGCAAAGAATCACAAAAGGATAAGCTAAGCAAT
GCACCTAATCGTCACTACCAAAGATTGCCACAGTGATTAAGAAAGATACA
TCACCAGTTNCCCCNANACTTTGCCATCACCCANGTCCACACATCAGCTG
GGGGAAGCTGTCACAGCCAAGGACTGCAGAGCCACGCCCGGACANTGGGA
ATTCCCGCAGGTGCCTCCAGCCACAGTGAGGCTTCCGACCCCGCTGTGAG
AGCGGCCCAGCTTTGATAGTGCTGAATAAACAAACTGACAGCACTTCTAG
TGCGGGAACANCTGGTTTCATTCTCCTCTTGGGTTCCTCCCAAAGCCTGG
CCAGGGCTCAAGGAGGAACCAAGGGAGTTGACTTTGACCATACACCCCCA
AACAAGGCCAGATGTCGGATTTCGTGGCCTTGTCCAGTTTCTAAATACGG
AAAGGTCAATACATGTTTCACTAATGAGTGGATACATCTATCANAGTGCT
AATGACCATGCATACTTCGTTAATGAGTGGATACAAAGATAACCTTTGGT
TGGAAGGTTCATCCAGAGGTCACCTTTGGCTCAGGGCCTGTTGTTCAGNC
CTCAGTCAGGGCTCTTGTCCGGGCCTTGGCACTTCAGGGACGTGATCTAG
TGGTGGGCTTGACAGTGCTGGGTGAACGGCTGGACTGNATGAGCTCGGAG
GTCTTTCCCAACAGAAAGGATTCTATAATTCCAGGATTCCATCTGCTGGA
TTCAGTTAGGTCCATGTTGGCAGCATTACTTNGGTCAAAAAGTCCCCTCT
TGNTCAGCTCTTGCGGCCTAAGGCTTCAGCTCCTTTAGCTCCTGGTGCTA
AGCTGCTCATGCTGGACNAGACGACTCGGAGAGAAGAATACAGTTCATCC
AATTCCTTCTGGGACACTGAGAGGGGAGGGTGTGGAACCAGGAGCATTGT
TTGGTGTGGCCTCCTCTCTGCCCTTCACACCTTTCAGCACTTTGAACCAG
CCAAGAGCTTTCTCCAAGGGTGCAGTGAAGCAGCTGTTCCTGCTGTCCCA
GCTCTGGCTCTTCCCAGTCTCTGACCTTGACTGGTTTTGTCCCTCTTGCT
GTGCCCTCTGTTCCCCCTGTGCTCAGTGGCTGCTGCCCAGGGCTGTGGAA
CTGGCACGGATCAAGGGCTCCAGCCCCTCCTTTCTCTGCCCTTGGAGCTG
CCTGCTCACAGCAGCCTTTTCCATCTGGAAGCTCCACATGGACAGGGAGT
CCCCACCTCTGTTCCCTGCACAGCCTCCAGGAGCCCAGGGCTGCCATCTC
AAGTCCCTGCTGGCACTGGGGGCTCCCAGGTGCCCCAGGCTGCTGTGACA
CCGCTGCACACGGGAGGGAAGAGTGGCAGGGGCTGTGCTGAAAGTCAGNT
CCATGTGCTGCTGCTGCTGCTGCTGCTGTGGGGGTCATTTGTCCAGCCCT
GCCCCAGAGTCAGGGATCAGATCCAGGCACTGCTGCTGCTCCCTCGGGAT
CAGCCACAGTTTGGGTGTTGCTGTCAGTGCCAGCAGAAGCGGTGGCTGGA
GCAGCGGGTGCTGACAGTGCCCCAAGCCCCGGGGCCGGAGGGGTCCCTGG
GCTGGGGGCTGGGAGGGAGCTGCCCCTTGTTCTCCCTCTGCCCCACACAG
AGCTGGGCTGGGCACAAGTGGGGCAGCACAGCAAACAGGGAGCCTGCGAG
TCTCTTCCAGCCCTGTCTGCTCAGTTTGGAACTTGGAGCTGCAGGTGGGC
AAAGGCAGCTGCTCCTGCTCCCTCTGTGTGTCCCCGTGTTCAGCAGTGCT
GCTCCATCAGTCTGCCCAGCANCGGGGAAGAGCCTCAGCCCTGCAGGGCC
AGGAGCTGCGGGCTCTGCCTGAGCAGCTCAGCCAGCGGGAAGGAGCTGCT
CCACACGGGAACCAGGAGCCAAGGACACTCTTTTTTATGGCATGTTTTCT
GGTTTAAGGAAAAACCACAGAAAAAATGTGAAAGATAAAAACAAAATNAA
GGTGTTACTGAAAAATNNTTCGTAGCTTTGGATAAAGGGGTAACTGATTT
TTTTAAAACAAGAACTAAGTTATTTACTTTGTAAATGTGCTGATGGCATG
GGTCCATCTTACTGACCTCAGCAGACTTTTTAAAACAATTTTGGGGTTTA
TTTCCAATATTGTTATTTTAAATTGTGGTTGAAGCAAGAGGAAATTGCTT
TGTGCCCTGCCAGCTTCAAGCAGGACTGGGAATCTAAACTCTGNCAACCC
CCAAATCCTTTAGAAGATGCCCTTCCTTCTCACCCTTCGAATGAGGTGCA
CATTTCCTTTAAATTGTCAGTGGTTTCTTAAAGATGGAAAGTCCCACTTA
CAGCTTTTGCTCTGGTTTGGAAGTGCAGAAGGGCAATTCTCCATCCATCA
GCTCCAGGCTGCACTGCCTTAGGAACACGNCCCCTCGCCAGGTTTTGCCC
ACTCGTGGCACTTCTAGAGGAGAAAGAAAGTGCAACTGCACAATTCCAGN
CAAGAAGGAACGAAGAGTGGGACAGACAAAACATCCCGTGGAGATCCAGG
GGTTCAGCTGGGACCGTGGAGAGTTTGGGTTCTTGCCAATTGGGTGTGTG
TCCCTAACTGCAATCTCCTGGCCTGCAGGAGCGTCTCNCTCACCTGCAAA
AGCAGAAAGCTCAGGCGGTGTGCTTGGCCTGGTCCAGAACG
>oenMel5-2923#Unknown
GAGAGACTGAAATGTTAATGGTTAATGACTCAAAACAATTGNCCATTTGC
GAAAGCAGCAGGGTGCTTTGCTGATCAGGTGCACGGGAGCAGCCCAGGTG
CAGAGGGGGGATGACCATGACAAACCGACCTTTGTTTAGCAACAAGCTGG
GTTTTGAGCCAGATAAGGGAAGAGGCCGATAAGAAGCAGATCCTGCGAGG
TGGGNTAGTGCTTTTTATCATGCCAATGTCCTCCCTTACACAACTGGCTC
AGNTGTGAAAACTCCCCCGGGGAAGTATCGGGACATTCACACGTAGGCCT
GAAGGTGTTCATCCCTTCTGATGGGGCATAACTGGCTCAACTACGCTGAC
GTGAGAGGCAGCTGTCATGTCTTAGAGGTGTCATAAACCATCAAAGACCC
CAGAGTGCCTTCCACCGAGGACTGAAAGTGCTCCATCACCAGTGCACCTG
GGCGTTCCCACCTGAGCATACATTAACCCACCGGACTTTGTGTTTCGTGG
GCTTCCCCCATCCCCAATGGATCAAGACTCGACCATCACTTCGACCAACG
GACATCGAAACTGCAACAATCAAGTCTCGTCGCTGGATCCACGGGTGGTG
ATATCTTTCTACTCTTATCCTTTCTTTCTTTTTCCTTATACATTTTCTTA
AGTGATTTTATGCTTTTATATTACTATAGATAATAACCAAAATGGCTACA
TACCTGCTTTCCATTGCAACCAAATTGTTCTAAAATAAACCCTACATATA
TATATTTATAAACACCGATCATTCAGTGTCGTTTCACTCTAATCCGCCCC
AAGGGATCTATTAACAAGAACCTGGGTTACCCTTGCCTTCTGTG
>oenMel5-3427#LTR/ERVK
TAGGTGTAGAAGAAGAGATTACAGGCGACCTCGCCCCTGATAAGTCACAG
TTGTACTAATTACCAAAGAAGAGGAACAGCCTTGCCCTTAATGGGTCGCA
GCTGTGACTAATAAAGATAAGTGTGATAAAAGGGGTGGGTTGGCTGGTTA
GGGGGATCTTGGAGGCAGAGGGCCTGGAGAAAGAGGACCTTGAGGAGGTA
GAGGAGCCCTGAGGAAGAAGGAATGATCCAGAGAGACACAAAGAACGAAA
CAAGGAAGAGAGCTGCTGCAGTAAAAGATCTGCTGTGAGGTCAGTCTGGG
TCTGATGGAGTCAGAGCTGCTGTTGGAGCCTGCAGTCACAGCTGAGCTGG
GTGAAAGCTGTGTTCAGAGTCTGCAAACCAATACTTGCAGTCACAGTCCA
GCAGGAAACAGCCACAGTCAGAGTCTGCAGTTGGACCCTGCAGTGGGAGC
TTGCTGTAGTCAGAGTCAGGATGGCNAAGCTGTAAAGGAAGAATAAACCG
GGACCCTTTTCATGTTGTTGAATGAGAGTCTGTGTCTTGGCTCATTTCTA
CCCCTAATGAGAGGTCTGCTGC
>oenMel5-235#DNA/PIF-Harbinger
TGGCCAGATCCTCAGCTGGTGTAAATCAGCGNAGCTCCATTGACTTCAGC
GGAGCTGATTTACACCAGCTGAGGATCTGGCCTCAT
>oenMel5-1813#Unknown
CCAATGACCACACCCACTGACCACACCCCACTGACCANAACCACTGACCA
CACCCACTGAACACACCCTTGGCCAAGCACCTCCCGATGACCACACCCCA
ATGGCCACACCCACTGACCACACCCACTGACCACNCCCACTGACCGCANC
CACTGACCACACCCACTGACCACCCATGACCACACCCACTGACCACCCAA
TGACCACACCCACTGACCACACCCCACTGACCGCCCAACTGACCACACCC
ACTGACCACACCCGCTGACCACAACCCACTGACCACACCCTCTGCACAAC
TGNCCGACACCAATGACCACACCCCACTGACCACACCCACTGACCAACCC
ACCGACCACCCCCANTGACCGCACCCACTGACCACACCCACTGCCCACAC
CCGCTGACCACACCGCAATGACCATCCACTGNCCACAANCACTGACCACA
ACTACTGACCATGCCGCACTGCTCACACCCACCGACCACACCCACTGACC
ACCCCTAACTGAACATCCCTACAGCTACCTTCAAAGTGACTGCACCTACT
GTCCACAGCCAGTGTCCACAGCCAGTAACCACACCTTAATGCTCACATA
>oenMel5-994#LINE/CR1
AGCCATATGAAGTTCAACAAGGGCAGGTGCTGCATTCTGCACCTGGGATG
GGGCAGACCTGGATGTAGGTTCAGACTGGGGAATGAGAGGCTGGAAAGCA
GTGCCAGGAAAGGGACCTGAGGGTCCTGGTCAATGGNAAGCTGGACATGA
GCCGGCAGTGCCCTGGCAGCCAGGGGGGCAAAGCGTGTCCCGGGGGCATC
AGGNACAGCGTGGCCAGCAGGGCAAGGGAGGNGATCCTCCCGCTCTGCTC
TGAGCTGGNGCGGCCNCACCTCGAGTGCTGTGCCCAGTTCTGGGCNCCTC
AGTNTAAGAAAGACACGAAACTGTTAGGTCCAGAGAAGANTNATGGAGAT
GGTGAAGGGTCTGAAGCATCTCTCTATGAGGAGAGGCTAAGGAGCTGGNA
CTGTTCAGCCTGGAGAAGAGACTGAGGGGGGACCTCATTGCGGTTACAAC
TTCCTCCTGAGGGGAAGAGGAGGGGCAGGCACTGATCTCTNCTCNGTGGT
GNCCAGNGACAGGACCCGAGGGAATGGCCTGAAGCTGNGCCAGAGGAGGT
TTAGGTTGGATATCAGGAAAAAATTCTTCACCCAGAGGGTGGCCGGGCAC
TGGAACAGGCTCCCCAGGGAAGTGGTCACAGCACCAAGCCTGNCAGAGCN
CAGGAAGAGTTTGGGCAGTGCTCTCAGGNACATGTGTGACTCTTGGGATG
TGCTGTGCAGGGCCGGGAGCTGGACTCGATGATCCTTGTGGGTCCCTTCC
AACTCAGGNTATTCTGTGATTCTGTGAAAAGTATCTCTCCTTTTCTACAA
ACTCATTCAGTTACTTGAATATCTAACACGTATAGAATTATGGCTCTTGA
AATTATCTGTATTTGTATTGACTA
>oenMel5-1163#LTR/ERV1
TTTTAAAGAGTTAAAATTTTAGCTNAGGGTTAGAAGCAATTCATATTGAT
CAGGGTGTAAGTTAGATAAACAAGTGATAGGTTAATGATTATTAGATGCT
TAAACTAAAGATAATAGAGGTATTGTTTCCAATTATGAGCTTGTTTCAGT
TTCGTTTATAGAAAGAGCTGGAGTAAGTGAACCACTGTAAGAACAGGTTG
AAACCAGTAGAACAATGGCTAACGCCTGAACTTCATACCAATCTATCACG
AAGCAGAGGACCTTAGATTGTGCCAAAAGGTCAAGGAGACCTGATGAAGA
CTTTTCTTACTTCATCTTTCGAGACCACTGACCCAATTTGAGACCACCTA
CCCAACTCAAGAGTAGAATTGTGCACACGTGAAGGACTAATAGCCTCACT
TTAATACGGAGTGGGGATGAGAGGTGCTGGGGTTCTGTATATGCATAGAA
TGTAAGATTTTGAGAAATAAATAGAAGGCAAGGAACCTTGTNTGAGGCTG
CCATGTCTCAAGGGGACAACTCCCGTGCAGCCCGCTGGCATCTGAATAAA
CANACCACTTTCTAACTTTAANTTGTTAGAGAGTTTTGTCCGTCAANATA
TCGG
>oenMel5-9190#LTR/ERVK
GCAATAAGCAGACGGGACTCAGTTTCTTCATGCAGAAAAAGCCAATTCTT
TATTNCACAGCTCATTTTTATACGGTTTTCACAGGCATCGTGTTTAACTC
TAATTGGTTAGTAATTTTCTTGCCACTCAGTTATTGGTTGGTAAANGGCG
TTTTACGTGTCTGTCAAANCTCTCTATTCTTGGATTGTTTACATATTTTC
TTCGCGGATTCTCATGGGACAGATTTNTTGTTTCTCGCAGGTGCAAACTG
TTTTTCTTTACAAGTGCTAACTGTTTTCATTCTTATGATTCTTCCTCATG
GGAACTTNACAGGCCAGCTGTTAATTCAGCAGAGCAAGGCCTGATTTTAT
AAGGCCTTTCTTTTATAANGTCTTTACCTGTATGCAA
>oenMel5-1524#LINE/CR1
AGGGCAAGAACATAAGGGTGGGGCAGTTAAGCATTATGTCGAAGAAAAGC
TGGAATCTTTGGGATTCTGCTTAGGGATAGGTGATGTTCCAATTGAGAGT
TTATGGGTAAGAATTATGGATGGATTATGTCATATGGATGACATTGTAGT
GGGCATGTGCTGTAGGCCACCTGACCAGGAAGAACTAGATGAGATGTTTT
TTGGAGAGCTNGAAGTACCCTCACATTCACAGNCCATGGNCGTCGTGGGG
GGCACCTCAANNNGGACCTGGGGCANANACAGTGCAGCAGGGCACAAGCA
ACCCNGGAGGTAACTGGAAATTGNAATTGANAGCTTCCTGNCCCAAAAAA
ACAGTGANAAGAGGTTAGCTCTGCTGCACACTCACGAAACAAGAGGAGGG
CTCATTGGGGCTGCCAGTATNAAGGTCAGTNAGGCAGCATTGNCTCCAGT
GNCCANGNTGGNGGANNTCANNATCGTNAGGGGAAGAACGAGGCGGAAGA
CAAGATCACATTTTTGAACTCCAGGAGCGTAAAGTCCCATGGGATAAAGC
CCTGGAGGGAAGAGGGACCCAAGAAAGCTGGTCGATATTCAAGGATCACT
CCTCCAAGCTCAAGAGCGGTGCATCCCAACGAACAGGAAGTCAGGCAAAA
ATGNCAGGAGGCCTGCGTGGATGAACAAGGAAACTCAAACANAAAAGAAG
CATACAGAGGGTGGAAGCAGGGACAGGTAGCCCGGGAGGAATGCAGAGAA
ACTGTCCGAGCGCGCAGGGATGAGGTTAGGAAAGCCAAAGCCCNGATGGA
GTTGAATCTGGCGAGGGACGTCAAAGGCAGCAAGAAGGGCTTCTATAAGT
ACATCGATAGCAAAAGGAAGCTAGTAAAAATGCGGGCCCTNTGTCGAGCG
GGAGCGCCGTGACGAGTGGACATTGGAAAAGGCCGAGGTACTGCATGCTT
CTTCGCCTCGGNCTTCACTGGTAAGACTGTTCTTCAGGAATCCCAGGNAC
CAGAGACGAGGNGAAAGTCTGAGGNGAGGAANANGTACCCTTAGTGGAAG
NCAGGGGATACTTACGCAGACTGGACAAAGGTGAATCCACGGGTCCTGAT
GNGATGCNCNCGCAGGCGCTGAGGGCAGCTGGCCTGTGTCACTGTGAGGC
CACCCTTGATAGGCTTTGAATGATCTCAATGGCTAGGAGAGGTGC
>oenMel5-1822#Unknown
CCTATGGCCCAGCAGAGCTCATCTGTTCTGTCCATCAGCTGGGGCCATAA
CTCAGGGCGTCTTCCCCCTCTCAGGAATTGCTGAGATAACCCAGGCCGGA
CATCTGTCCTGTCNTGAGTTCTCTCTGGCGCCAGGGAGGCGGAACTCCCA
GCTGACAATGAACATCTTGCCTTGAGAGCAGATGAAGGGAGATAAGCCTT
GAATTTCTGACTGACAGACACTTCGCTTTACAAACTATAAAAGCCACACG
AAACTTTCACAAAGCAGAAGTCTTCTGCACAGTCCCTGGAAATGNGTAGG
GCTTCTCCCCCGAGTNTGGACGCANNTTCGTGGTTACTTCCCTGGGAGCT
GAGTGAAAGGGCTCCATGTGTACTCCCTCANCAATTCGGTGGTAAGTTAC
ATTGACTCCTGATCNATGCTATTTCTTCGCTAGCTGTAATATAGGTACCT
TTATTGTGCACTGTGTTTGTATCTACCAGTATTTCTTTTGTTTATCCTGT
GCAGTAAGTAGTCCGTTTAAGGTCTTNTGTCTGTTAGTCTTNTGTCTATT
CAATAAATAATTCATTCTATAATAGACCTAATCGGCCATTCTAAAGAACT
TGCGAGCGAGAGCGAGTTTTGGGGTGCTGGCCGCCTNAATAAAGCTACTG
CCTCTGCCAGAGGCCTGGGCANAGGGCAGGACTTGTCTAAGCTCTCACAT
CCATTTA
>oenMel5-1825#Unknown
AGNCAAAATCTATTAGGAAAGCCTATCCTGCNGTATCATAAGGCGCAAAC
ATGACNCCATTNGTTTATAAANTACTCAGAGGACAACCAAGGGGTTNTCG
ANGNCTTATACCTGAGAGNTTTCAGANGTCTGACTGNACCNTTANAAAAT
NTCCTCTTTGAGGANANAGGTTTGCAAACTNCATATATTCATANANACTT
ANTTGTTTTGTGNTANTANNAAATGCACAAAANGATCTNAATCGGCGTTA
TCTNCAACACGTCACGGACATTGTGATAAAAAGCNTTGTATTNTACNAAA
CNGTTTTNAANNAGGAGTGATTACAGTAANGCTAGCGAAGATAGGAACGA
NNTCAAGTAACATAATAAGCTGAAACGTAANACAGCCGTGCCAAAAACGG
AGGCANATGCACTCTACAAGCTAATNATTCNGANTGAGCTGAGAAGGCTG
CACACACACGGGGTGATCATTACNACACCATGGCAAAANGAGNTNCCGTG
CAAAACCAACTGCTAATANTNGGNANGGGGTGGTTTGAGACTCANNCTGT
GGGGCTGNTGGGCGGCAGGTTCCCTTTGGCAGCTGGAGCTTCTCAGGCCT
GAGCGCGTCGTCGTGCATTGGCAGAAGCCGAGCGACGACAGGGCAAGANC
AAGCTGGATGAGAGGCAGCTTCGAGGTCAAGAGTGGAACGGCGAGGCAAG
AGCCAGCGTGGAGCTGAAGAAGGAGCACGAGAGGCCCTCTGGGCAAAGGG
CCTTCCTGCCATGGCTAAGGCACCTTCAAGGTGCCGCGGCTGACTTTGCT
TGTGCTGGGCGACCTCCCTGTGTTCAGGGCTGGGTCTTTGCTGTGGTTGG
CCTTTTGCCGTTGTGCTCCTTTGGCTGCCTGGAGAGAGGGGCAACCCTGT
AAGGAGGGTGAGAGCCCCTGTCTCCGCACCTGAGTGGGGAAACGGAGCTC
CCCGAGCCCCCAGCCCGGCCGCCCTGTAAGCAGGGCAGGGCTTTTCCCCA
GCCGAGGCAGCTTTCTGCCTGCTGCTGGTCCCTGGCCAGCGTGACCCCCT
GTACTCGGGGCGCGTCACAGCCTTTGTCCCTGTACCAGCCCCGAAGCGCC
TCAGCATGTCGAGGCCCTCGTGCCCTCCATACAGTGCAGCGTGGTGCAGC
TGTGATGCTTTTGTCTGCCACTGAGCAGTTGGGATGGCTCTCTTGAGCCC
GTTGGCTGCAGGGAACTTGCTCCCTCTCCTGGGACTGTCTTCCCCTCCAT
ATCCAGTCTTCCCATTAGGTGGTGTGAGTGAGCAAGTGCGTTTGCGCTTC
AGGCCCCCGTTTAGAATTAGAGCAGTGTAGCTTCGACTTCCCAGGAGGGA
AAGAGGAGCTCTCAGCAGCCACAAGCAGGACCCCAAAGTGCTTGGGTGGA
GAAAGTGTCCGGCCTCGCCCCTGCGTTCTGAGGACGGTACGAAGCCGCTT
AACGGTGGCGCCTGTAAGCAGGGCAGGGCTTTTCCCCAGCCGAGGCAGCT
TTCTGCCTGCTGCTGGTCCCTGGCCAGCTTGACTCCCTGTATTTGCGGCA
CGTGTCTGGACCTTGCTTTTCTCCTTTGTCCCCAGGAGCAGCCCCAGGTC
CCTGTAAGCAGGGCTGGGGAGGCTGCTTTAGCCGGGCGACAGGAACGACC
GCTCCCGGGCCCTTGCCAGGGTGCAGGTTGCCAGGGCCAGTCTTGCCTTT
GGCGCCGCTTTGGGCTGGCTCCCTGGCTGCCTCGGTTGAGGAGGCTNGNG
GGGCTCCTGCAGACGGNTGTGTTGCCGTGCTGCGCTGCGGCCGGGCTCCG
GCCGGCCCCTAAGTGGGGCGCAGGCCGGAGCCCTGTGCTCCGTGGCGCTT
GTTGGGGGGTGCCNGGCAGCGGGGGGCGGCCCCGTAAGTGGGGTTGTGTG
CGCCCCCTGGTCTCGGCGGGCGGTTGGAGGGACCCCCTGTAATCAGGCGG
GTATCCCTGGCCCCGGCCTTTCAGAGGCGTGGGGCCAGGAGTGGTGGGGC
CGGGCATGTGCCCTCCCTGTCGCCGGGGCTGGGCTCCCGGCCCCTGGGGC
CACTCGGGCCCTTGGCCTTTAGGCCGTGAGTCGGACTGCCTGACTGTGGA
GTCCNGTTCCTGTTGCCATGGGGGAAGGCCGAGCTCCGTGGCTCCCTGGG
TGTGGACCTGCCTGTAAGCAGGCCGAAGGTCCGGGAGCCTTTGTGCTCCC
TTCAGCGGGCAGCCTGCGTAGGGCTCCCTCCCCGTTAGTGGGGAGNGGGC
CGGAATTGGAGAGAAGGAGCCTCCGTAGGCCTTGGGGACCAGGGCCGCCC
TGTAANTCGGGGCCGGCGCTCTGGAGTCCCGGGCACTTTGCAGTCCAGGC
AGCGGCTTGAGCGTCCTGTAAGCAGGGCTGCAGCCTCTTGTCCGCTGCTT
TGCATGCCCAGCTTCATTTGCCCAGAGGGCCCGGCTCCCAGCAGCGGCGT
GGGACTTTTCCGGACGTCGAGGTGGTAAGTCAAGCTGGATTTGGGGGCTT
TTGAGCAGCTGTGGGGGGTTCTGTGGGTGGTGGCGTGAGGATGTCGACGT
GGGGCTGGTGGGCGGCGGTTCCCTTTGGCAGCTGGAGCTTCTCAGGCCTG
AGCGTGTCGTCGTGCATTGGCAGAAGCCGAGCGACGACAGGGCAAGANCA
AGCTGGATGAGAGGCAGCTTCGAGGTCAAGAGTGGAACGGCGAGGCAAGA
GCCAGCGTGGAGCTGAAGAAGGAGCACGAGAGGCCCTCTGGGCAAAGGGC
CTTCCTGCCATGGCTAAGGCACCTTCAAGGTGCCACAGCTGACTTTGCTT
GTGCTGGGCGACCTCCCTGTGTTCAGGGCTGGTCTTTGCTGTGGTTGGCC
TTTTGCCGTTGTGCTCCTTTGGCTGCCTGGAGAGAGGGGCAACCCTGTAA
GGAGGGTGAGAGCCCCTGTCTCCGCACCTGAGTGGGGAAACGGAGCTCCC
CGAGCCCCCAGCCCGGCCGCCCTGTAAGCAGGGCAGGGCTTTTCCCCAGC
CGAGGCAGCTTTCTGCCTGCTGCTGGTCCCTGGCCAGCGTGACCCCCTGT
ACTCGGGGCGCGTCACAGCCTTTGTCCCCGTANCAGCCCCGAAGCGCCTC
AGCGCGTCGAGGCCCTCGTGCCCTCCATACGGTGCGGTGCGGTGCAGCTG
TGATGCTTTTGTCTGCCGCTGAGCAGTTGGGATGGCTCTCTTGAGCCCGT
TGGCTGCAGGGAACTCGCTCCCTCTCCTGGGACTGTCTTCCCCTCCATAT
CCAGTCTTCCCGTTAGGTGGTGTGAGTGAGCAAGCGCGTTTGCGCTTCAG
GCCCCCGTTTAGAATTAGAGCAGTGTAGCTTCGACTTCCCAGGAGGGAAA
GAGGAGCTCTCAGCAGCCACAAGCAGGACCCCAAAGCGCTTGGGTGGAGA
AAGTGTCCGGCCTCGCCCCTGCGTTCTGAGGACGGTACGAAGCCGCTTAA
CGGTGGGCCTGTAAGCAGGGCAGGGCTTTTCCCCAGCCGAGGCAGCTTTC
TGCCTGCTGCTGGTCCCTGGCCAGCTTGACTCCCTGTATTTGCAGCACGT
GTCTGGACCTTGCTTTTCTCCTTTGTCCCCAGGAGCAGCCTCAGGTCTCT
GTAAGCAGGGCTGCAGAGGTTGCTTTAGCCAGGCGACAGGAACAACTGTT
CCCGGGCCCTTGCCAGGGTGCAGGTTGAAGAAGTGCTGGTGCCACCTCCC
TGGCAGCCTCGTTGAGGAGGCTGGAGGGACTCCTGCAGACGGCTGTGTGT
GCCGCGCTGCGCTGCGGCCGGGCTCCGGCCGGACCCCCCGTAAGTGGGGC
GCAGGCCGGAGCCCGTGGCTCCGTGGCGCTTGTCGGGGGGTGGCCCGGCA
GCGGGGGGCGGCCCCGTAAGTGGGGTCGTGTGCGCCCCCTGGTCTCGGCG
GGCGGCTGGAGCGGACCCCCTGTAATCAGGCGGGTATCCGTGGCCCCGGC
CTTTCAGAGGCGTGGGGCCAGGAGTGGTGGGGCCGGGCATGTGGCCCTCC
CTGTCGCCCCGGGGCTGGGCTCCCGGCCCCCGGGGCCACTCGGGCCCTTG
GCCTTTAGGCAGGCTGTGGGTCCGGGCGCCTTTGTGCGCCCTTCAGCTGG
CAGCCTGCGTTGAGCGCCCTCCCCGTTAGTGGGGAGTGGGCCCGAATTGG
AGAGAAGGAGCCTCCGTAGGCCTCGGGGACCAGGGCCGCCCTGTAAGTCG
GGGCCGGTGCTCTGGAGTCCCGGGCATTTTGCAGTGCAGGCAGCGGCTGG
GGCCGCCCTGTAAGCAGGGGTGCAGCCTCTTGCGCGCTGCTTTGCTTTGT
GCCCAGCTTCTTTTGCCCAGAGGGCCCGGCTCCCAGCGCGGCGTTGGACT
TTGGCGGACGTCGAGGTGGTGAGTGGAGCTGCAGTTGGGGGCTTTTGGGC
AGCTGTTGGGGGGTTCTGTGGGCGGTGGGCTGGCGCGAGGGTCTCGATGC
GGGGCCGGTGGGCGGCGGTTCCCTTTGGGAGCTGGAGCTTGTCAGGCCTG
AGTGCATCGTCCTCCACTGGCAGGAGCCGAGCGACGGCCGGGCAAGGACA
AGCTGGATGAGCGTCAGCTTCGAGGTCAAGAGTGGAACGGCGAGGCAAGA
GCGAGCTCGGAGCAGAAGAAGGAGCACGAGAGGCCCTCTGGGCAAAAGGC
CTTGGTGGCACGGCCAGGGCACCTTCAAGGTGCCGCGGCTGACTTTGCTT
GTGCTGGGCGACCTCCCTGCGTGCAGGGCTGCGTCTTTGCTCTGGTTGGC
CTTTTGCCGTTGTGCTCCTTTGGCTGCCTGGAGAGAGGGGCAACCCTGTA
AGGAGGGTGAGAGCCCCTTTTCTCTGCACCTGAGGGGGGAAACGGAGCTC
CCCGAGCCCCCAGCCCGGCCGCCCTGTAAGCGGGGCAGGGCTTTTTCCCA
GCCGTGGCAGCTTTCTGCCTGCTGCTGGCCCCTGGCCAGCGTGACCCCCT
GTACTCGGGGCGCGTCACAGCCTTTGTCCCCGTAGCAGCCCTGAAGCGCC
TCAGCGCGTCGAGGCCCCTGTGCCCTCCCCACGGTGCGGCGCGGCGCAGG
TCTGATGCTTCTGTCTCCTGCTGAGCACTGGGGGTGGCTCCCTTGAGCCC
TTTGGCTGCACGGAACTCGCTCCCTCTTCTGGGACAACTGTCTTCCCCCT
CCCTCCCTTGTCATTGCGTTAGGTGGTGTGAATGAGCCCGGCGCGTTTGC
GCTTTAGCCCCCCTTTAGAAATAGAGCAGGGTAGCTTAGGCTTCCCAGGA
GAGCCCGAGGAGCTCCGTGCAGCCACAAGCCGGTCCCCAAAACGCTTGCG
TGGACAAAGTGTCTGGCCTCGCCCCTGCTTTCTGCGGAGGNCAGAGCGAA
GCCGCTCAGCGNTAGATCGTGGGCANCGTGACCCGCCTNNAGCCAGGGCC
TGGGTNTGTCNGCCTANGNTGCCAGCCCTGTGCTGGTGAACTGGCAGCGT
GCGGGCCCCTTAACCTGGGCACGTGTCAGGAACTTGCTTGTCCCTTTTTC
CCCAGGAGCAGCCCCAGGGCCCTGTAAGCAGAGGTGGGGAGGCTGCTTTA
GCCGGGTGACAGGAACGCCTGCGNCCGGNCCCTNGCTGGACCCTGAGCGG
GGCNCAGGCCGGAGCCCGTGCTCCGTGGCGCNTGTTGGGGGGTGCCGCCG
CGGGGGGCGGCCCCGTAAGCGGGGTGGTGTGCGTCCCCTGCCCTCGGCGG
GCGGTTGGAGGCACTCCCTGTAATCAGGCGGGTGTCCCTGGCCCCGGCCT
TTCAGAGGCGTGGGGTCAGGAGTTATGGGGCCGGGGTGAGTGCCCTCCCC
GNCCCCAGGGCTGGGGTCCCGGCCCCTCCCCCTCGGCCTTAGGCCGTGAG
CAAGACTGCCTGACTGTAGACTCTAGTCCCTGTCGCTGTGGAGCAAGGCT
GAGCTCTGGGGCGCACTGTGCGGATATCCGGCCTGTAAGCATGCTGTGGG
TCCGGGNGCCTTTGCGCGCCCCTCAGCTGGCAGCCTGNGTGNGAGACGCN
NNACCCGTTAGTGGGNAGTGNNCCGGAATTGGAGAGAAGNAGCCTCCGTA
AGGNCTCGGGNGCCGCTTTGGGCCGCCCTGTAAGTCGGGGCCGGTGCTCT
GGAGTCCCGGGCATTTTGCAGTGCAGGCAGCGGCTGGGGCCGCCCTGTAA
GCAGGGGTGCAGCCTCTTGCGCGCTGCTTTGCTTTGTGCCCAGCTTCTTT
TGCCCAGAGGGCCCGGCTCCCAGCGCGGCGTTGGACTTTGGCGGACGTCG
AGTGGTGAGTGGAGCTGCAGTTGGGGGCTTTTGGGCAGCTGTTGGGGGTT
CTGTGGGCGGTGGGCTGGCGCGAGGGTCTCGATGCGGGGCCGGTGGGCGG
CGGTTCCCTTTGGGAGCTGGAGCTTGTCAGGCCTGAGTGCATCGTCCTCC
ACTGGCAGGAGCCGAGCGACGGCCGGGCAAGGACAAGCTGGATGAGCGTC
AGCTTCGAGGTCAAGAGTGGAACGGCGAGGCAAGAGCGAGCTCGGAGCAG
AAGAAGGAGCACGAGAGGCCCTCTGGGCAAAAGGCCTTGGTGGCACGGCC
AGGGCACCTTCAAGGTGCCGCGGCTGACTTTGCTTGTGCTGGGCGACCTC
CCTGCGTGCAGGGCTGCGTCTTTGCTCTGGTTGGCCTTTTGCCGTTGTGC
TCCTTTGGCTGCCTGGAGAGAGGGGCAACCCTGTAAGGAGGGTGAGAGCC
CCTTTTCTCTGCACCTGAGGGGGGAAACGGAGCTCCCCGAGCCCCCAGCC
CGGCCGCCCTGTAAGCGGGGCAGGGCTTTTTCCCAGCCGTGGCAGCTTTC
TGCCTGCTGCTGGCCCCTGGCCAGCGTGACCCCCTGTACTCGGGGCGCGT
CACAGCCTTTGTCCCCGTAGCAGCCCTGAAGCGCCTCAGCGCGTCGAGGC
CCCTGTGCCCTCCCCACGGTGCGGTGCGGCGCAGGTCTGATGCTTCTGTC
TCCTGCTGAGCACTGGGGGTGGCTCCCTTGAGCCCTTTGGCTGCACGGAA
CTCGCTCCCTCTTCTGGGACAACTGTCTTTTCCCTCCCTCCCTCCCTCCC
TTGTCATTGCGTTAGGTGGTGTGAATGAGCCCGGCGCGTTTGCGCTTTAG
CCCCCCTTTAGAAATAGAGCAGGGTAGCTTAGGCTTCCCAGGAGAGCCCG
AGGAGCTCCGTGCAGCCACAAGCCGGTCCCCAAAACGCTTGCGTGGACAA
AGTGTCTGGCCTCGCCCCTGCTTTCTGCGGAGGGCACGAAGCCGCTTAAC
GGTAGCGTGGGCAACGTGACCCGCCTGTAGCCAGGGCCTGGGTCTGGGCC
TAGGGTGCCCTTTGTGCTGGTGAACTGGCAGCGTGCGGGCCCCTTAACCT
GGGCACGTGTCAGGAACTTGCTTGTCCCTTTTTCCCCAGGAGCAGCCCCA
GGGCCCTGTAAGCAGTGGTGGGGAGGCTGCTTTAGCCGGGTGACAGGAAC
GCCTGCGCCCGGGCCTTTGCCCCTGAGCGGGGCNCAGGCCGGAGCCCGTG
CTCCGTGGCGCNTGTTGGGGGGTGCCGNNCCGCGGGGGGCGGCCCCTGTA
AGCGGNGTNGTGTGCGCCCCCTGNCCTCGGCGGNCGGTTGGAGGNACCCC
CTGTAATCAGGCGGGTGTCCCTGGCCCCGGCNTNTCAGAGGCGTGGGGCC
AGGANTCGTGGGGCCGGGTCGNGTGCCCTCCCTGTCNCCGGGGCTGGGNT
CCCGGCCCCTGGGGCCCCTGGGGTCCTCGGCCTTTAGGCCGTGAGCNGGG
CTGCCTGACTGTGGANTCTGGTCCCTGTCGCCGTGGGGNAAGGCCGAGCT
CCGTGGCTCCCTGGGTGCACTATGGATCATCCGGCCTGNAAGCAGGCTGT
GGGTCCGGGGCCTTTGTGCCCTCAGCTGGCAGCGGGCGTGGGGTGACAGC
CTCATTAGTGGGGAGTGGGCAACGGAACTGGAGAGAAGGAGCNTCCGTAG
GCGTCGGGGACCAGGGCCCACGCCCTGTAAGTCGGNGCCGGTGCTCNGNA
GTCCCGGNCACTTTGCAGTNNAGGNAGCGGCTNGGGCCNCTCCTGTAAGC
AGGGGTGCAGCCCCTTGCGCNCTGNCTTGCTTTGTGNNCANCTTCNTTTG
CCCAGAGGGCCCGGCTCCCAGCGCGGCGTTGGACTTTGGCGGACGTCGAG
GTGGTGAGTGGAGCTGCAGTTGGGGCTTTTGGGCAGCTGTTGGGGGGTTC
TGTGGGCGGTGGGCTGGCGCGAGGGTCTCGATGCGGGGCCGGTGGGCGGC
GGTTCCCTTTGGGAGCTGGAGCTTGTCAGGCCTGAGTGCATCGTCCTCCA
CTGGCAGGAGCCGAGCGACGGCCGGGCAAGGACAAGCTGGATGAGCGTCA
GCTTCGAGGTCAAGAGTGGAACGGCGAGGCAAGAGCGAGCTCGGAGCAGA
AGAAGGAGCACGAGAGGCCCTCTGGGCAAAAGGCCTTGGTGGCACGGCCA
GGGCACCTTCAAGGTGCCGCGGCTGACTTTGCTTGTGCTGGGCGACCTCC
CTGCGTGCAGGGCTGCGTCTTTGCTCTGGTTGGCCTTTTGCCGTTGTGCT
CCTTTGGCTGCCTGGAGAGAGGGGCAACCCTGTAAGGAGGGTGAGAGCCC
CTTTTCTCTGCACCTGAGGGGGGAAACGGAGCTCCCCGAGCCCCCAGCCC
GGCCGCCCTGTAAGCGGGGCAGGGCTTTTTCCCAGCCGTGGCAGCTTTCT
GCCTGCTGCTGGCCCCTGGCCAGCGTGACCCCCTGTACTCGGGGCGCGTC
ACAGCCTTTGTCCCCGTAGCAGCCCTGAAGCGCCTCAGCGCGTCGAGGCC
CCTGTGCCCTCCCCACGGTGCGGTGCGGCGCAGGTCTGATGCTTCTGTCT
CCTGCTGAGCACTGGGGGTGGCTCCCTTGAGCCCTTTGGCTGCACGGAAC
TCGCTCCCTCTTCTGGGACAACTGTCTTCCCCTCCCCTCCCTCCCTTGTC
ATTGCGTTAGGTGGTGTGAATGAGCCCGGCGCGTTTGCGCTTTAGCCCCC
CTTTAGAAATAGAGCAGGGTAGCTTAGGCTTCCCAGGAGAGCCCGAGGAG
CTCCGTGCAGCCACAAGCCGGTCCCCAAAACGCTTGCGTGGACAAAGTGT
CTGGCCTCGCCCCTGCTTTCTGCGGAGGGCACGAAGCCGCTTAACGGTAG
CGTGGGCAACGTGACCCGCCTGTAGCCAGGGCCTGGGTCTGGGCCTAGGG
TGCCCTTTGTGCTGGTGAACTGGCAGCGTGCGGGCCCCTTAACCTGGGCA
CGTGTCAGGAACTTGCTTGTCCCTTTTTCCCCAGGAGCAGCCCCAGGGCC
CTGTAAGCAGTGGTGGGGAGGCTGCTTTAGCCGGGTGACAGGAACGCCTG
CGCCCGGGCCTTTGCCCCTAAGCGGGGCGCAGGCCGGAGCCCGTGCTCCG
TGGCGCTTGTTGGGGGGTGCCGGGCTGCGGGGGGCGGCCCCGTAAGCGGG
GTTGTGTGCGCCCCCTGGTCTCGGCGGGCGGTTGGAGGGACCCCCTGTAA
TCAGGCGGGTGTCCCTGGCCCCAGCCTATCAGAGGCGTGGGGCCAGGAGT
GGTGGGGCCGGGCGTGTGCCCTCCCTGTCGCCGGGGCTGGGCTCCCGGCC
CCTGGGGCCCCTGGGGTCCTTGGCCTTTAGGCCGTGAGTTGGGCTGCCTG
ACTGTGGAGTCTGGTTCCTGTCGCCCTGGGGGAAGGCCGAGCTCCGTGGC
TCCCTGGGTGCGGACCGGCCTGTAAGCAGGCTGTGGGTCCGGGCGCCTTT
GTGCGCCCTTCAGCTGGCAGCCTGCGTTGAGCGCCCTCCCCGTTAGTGGG
GAGTGGGCCCGAATTGGAGAGAAGGAGCCTCCGTAGGCCTCGGGGACCAG
GGCCGCCCTGTAAGTCGGGGCCGGTGCTCTGGAGTCCCGGGCATTTTGCA
GTGCAGGCAGCGGCTGGGGCCGCCCTGTAAGCAGGGGTGCAGCCTCTTGC
GCGCTGCTTTGCTTTGTGCCCAGCTTCTTTTGCCCAGAGGACCCGGCTCC
CAGCGCCGCGTCGGACTGTGCCGGATTTATCTATAGCGAGTCGAGCTGGA
GTTGGAGGCTTTTGTGGAGCTGGGGGTATATGGTGGGGGCTCGAGGATCT
CCCTCCGGGGCCGTTGGGTTGCGGTTCCCTGCAGGTGCAGGAGCTGGGGC
TTTTTAAACCTGAGTGCATCGTAATCGTCCATTGGCAGACAGGAGCGAAC
GAAAGGAGGAGCTGCTTCGAACTCGAGAGTGAAACAGAGAGGCAAGAGGG
ACTAAGAAGAGAGACCAAGCGGAGAAGCAGTGAGCGACGCGGAGCAGAAA
AGAAGGCACGAGAGGCTCTCTGGGCAAAGGGCATTCCTGGCACGCCTAGA
GCACCTTCTCGGTGCCGGGGCTGGCTTTGTGCTAGGCGACCTCTCTGAAA
GCAGGGCTGGGTCTTTGCTGTGGTTGGCCTTTTGCCGTTGTGCTCCTTTG
GCTGCCTGTAGAGAGATGCGACCATGTACGAAGGGGGAGAACCCATCNCT
ATACGTGAGGAGGGAAACGGAGCTCTCCCAGCNCCCAGCCCGGCCGCCCT
GTAAGCCGGGCAGGGCTTCTTCCCNGCCNTGGCAGCTTTCTGCCTGCTGC
TGGCCCCTGGCCAGCGTGACCCCCTGTACTCGGGGCGCGTCACAGCCTTT
GTCCCCGTAGCAGCCCTGAAGCGCCTCAGCGCGTCGAGGCCCCTGTGCCC
TCCCCACGGTGCGGTGCGGCGCAGGTCTGATGCTTCTGTCTCCTGCTGAG
CACTGGGGGTGGCTCCCTTGAGCCCTTTGGCTGCACGGAACTCGCTCCCT
CTTCTGGGACAACTGTCTTCCCTCCCTCCTCCCTCCCTCCCTCCCTTGTC
ATTGCGTTAGGTGGTGTGAATGAGCCCGGCGCGTTTGCGCTTTAGCCCCC
CTTTAGAAATAGAGCAGGGTAGCTTAGGCTTCCCAGGAGAGCCCGAGGAG
CTCCGTGCAGCCACAAGCCGGTCCCCAAAACGCTTGCGTGGACAAAGTGT
CTGGCCTCGCCCCTGCTTTCTGCGGAGGGCACGAAGCCGCTTAACGGTAG
CGTGGGCAACGTGACCCGCCTGTAGCCAGGGCCTGGGTCTGGGCCTAGGG
TGCCCTTTGTGCTGGTGAACTGGCAGCGTGCGGGCCCCTTAACCTGGGCA
CGTGTCAGGAACTTGCTTGTCCCTTTTTCCCCAGGAGCAGCCCCAGGGCC
CTGTAAGCAGTGGTGGGGAGGCTGCTTTAGCCGGGTGACAGGAACGCCTG
CGCCCGGGCCTTTGCCCCTAAGCGGGGCGCAGGCCGGAGCCCGTGCTCCG
TGGCGCTTGTTGGGGGGTGCCGGGCTGCGGGGGGCGGCCCCGTAAGCGGG
GTTGTGTGCGCCCCCTGGTCTCGGCGGGCGGTTGGAGGGACCCCCTGTAA
TCAGGCGGGTGTCCCTGGCCCCAGCCTATCAGAGGCGTGGGGCCAGGAGT
GGTGGGGCCGGGCGTGTGCCCTCCCTGTCGCCGGGGCTGGGCTCCCGGCC
CCTGGGGCCCCTGGGGTCCTTGGCCTTTAGGCCGTGAGTTGGGCTGCCTG
ACTGTGGAGTCTGGTTCCTGTCGCCCTGGGGGAAGGCCGAGCTCCGTGGC
TCCCTGGGTGCGGACCGGCCTGTAAGCAGGCTGTGGGTCCGGGCGCCTTT
GTGCGCCCTTCAGCTGGCAGCCTGCGTTGAGCGCCCTCCCCGTTAGTGGG
GAGTGGGCCCGAATTGGAGAGAAGGAGCCTCCGTAGGCCTCGGGGACCAG
GGCCGCCCTGTAAGTCGGGGCCGGTGCTCTGGAGTCCCGGGCATTTTGCA
GTGCAGGCAGCGGCTGGGGCCGCCCTGTAAGCAGGGGTGCAGCCTCTTGC
GCGCTGCTTTGCTTTGTGCCCAGCTTCTTTTGCCCAGAGGGCCCGGCTCC
CAGCGCGGCGTTGGACTTTGGCGGACGTCGAGGTGGTGAGTGGAGCTGCA
GTTGGGGGCTTTTGGGCAGCTGTTGGGGGGTTCTGTGGGCGGTGGGCTGG
CGCGAGGGTCTCGATGCGGGGCCGGTGGGCGGCGGTTCCCTTTGGGAGCT
GGAGCTTGTCAGGCCTGAGTGCATCGTCCTCCACTGGCAGGAGCCGAGCG
ACGGCCGGGCAAGGACAAGCTGGATGAGCGTCAGCTTCGAGGTCAAGAGT
GGAACGGCGAGGCAAGAGCGAGCTCGGAGCAGAAGAAGGAGCACGAGAGG
CCCTCTGGGCAAAAGGCCTTGGTGGCACGGCCAGGGCACCTTCAAGGTGC
CGCGGCTGACTTTGCTTGTGCTGGGCGACCTCCCTGCGTGCAGGGCTGCG
TCTTTGCTCTGGTTGGCCTTTTGCCGTTGTGCTCCTTTGGCTGCCTGGAG
AGAGGGGCAACCCTGTAAGGAGGGTGAGAGCCCCTTTTCTCTGCACCTGA
GGGGGGAAACGGAGCTCCCCGAGCCCCCAGCCCGGCCGCCCTGTAAGCGG
GGCAGGGCTTTTTCCCAGCCGTGGCAGCTTTCTGCCTGCTGCTGGCCCCT
GGCCAGCGTGACCCCCTGTACTCGGGGCGCGTCACAGCCTTTGTCCCCGT
AGCAGCCCTGAAGCGCCTCAGCGCGTCGAGGCCCCTGTGCCCTCCCCACG
GTGCGGTGCGGCGCAGGTCTGATGCTTCTGTCTCCTGCTGAGCACTGGGG
GTGGCTCCCTTGAGCCCTTTGGCTGCACGGAACTCGCTCCCTCTTCTGGG
ACAACTGTCTTCCTCTCCCTCCCTCCCTCCCTCCCTCCCTTGTCATTGCG
TTAGGTGGTGTGAATGAGCCCGGCGCGTTTGCGCTTTAGCCCCCCTTTAG
AAATAGAGCAGGGTAGCTTAGGCTTCCCAGGAGAGCCCGAGGAGCTCCGT
GCAGCCACAAGCCGGTCCCCAAAACGCTTGCGTGGACAAAGTGTCTGGCC
TCGCCCCTGCTTTCTGCGGAGGGCACGAAGCCGCTTAACGGTAGCGTGGG
CAACGTGACCCGCCTGTAGCCAGGGCCTGGGTCTGGGCCTAGGGTGCCCT
TTGTGCTGGTGAACTGGCAGCGTGCGGGCCCCTTAACCTGGGCACGTGTC
AGGAACTTGCTTGTCCCTTTTTCCCCAGGAGCAGCCCCAGGGCCCTGTAA
GCAGTGGTGGGGAGGCTGCTTTAGCCGGGTGACAGGAACGCCTGCGCCCG
GGCCTTTGCCCCTAAGCGGGGCGCAGGCCGGAGCCCGTGCTCCGTGGCGC
TTGTTGGGGGGTGCCGGGCTGCGGGGGGCGGCCCCGTAAGCGGGGTTGTG
TGCGCCCCCTGGTCTCGGCGGGCGGTTGGAGGGACCCCCTGTAATCAGGC
GGGTGTCCCTGGCCCCAGCCTATCAGAGGCGTGGGGCCAGGAGTGGTGGG
GCCGGGCGTGTGCCCTCCCTGTCGCCGGGGCTGGGCTCCCGGCCCCTGGG
GCCCCTGGGGTCCTTGGCCTTTAGGCCGTGAGTTGGGCTGCCTGACTGTG
GAGTCTGGTTCCTGTCGCCCTGGGGGAAGGCCGAGCTCCGTGGCTCCCTG
GGTGCGGACCGGCCTGTAAGCAGGCTGTGGGTCCGGGCGCCTTTGTGCGC
CCTTCAGCTGGCAGCCTGCGTTGAGCGCCCTCCCCGTTAGTGGGGAGTGG
GCCCGAATTGGAGAGAAGGAGCCTCCGTAGGCCTCGGGGACCAGGGCCGC
CCTGTAAGTCGGGGCCGGTGCTCTGGAGTCCCGGGCATTTTGCAGTGCAG
GCAGCGGCTGGGGCCGCCCTGTAAGCAGGGGTGCAGCCTCTTGCGCGCTG
CTTTGCTTTGTGCCCAGCTTCTTTTGCCCAGAGGGCCCGGCTCCCAGCGC
GGCGTTGGACTTTGGCGGACGTCGAGGTGGTGAGTGGAGCTGCAGTTGGG
GGCTTTTGGGCAGCTGTTGGGGGGTTCTGTGGGCGGTGGGCTGGCGCGAG
GGTCTCGATGCGGGGCCGGTGGGCGGCGGTTCCCTTTGGGAGCTGGAGCT
TGTCAGGCCTGAGTGCATCGTCCTCCACTGGCAGGAGCCGAGCGACGGCC
GGGCAAGGACAAGCTGGATGAGCGTCAGCTTCGAGGTCAAGAGTGGAACG
GCGAGGCAAGAGCGAGCTCGGAGCAGAAGAAGGAGCACGAGAGGCCCTCT
GGGCAAAAGGCCTTGGTGGCACGGCCAGGGCACCTTCAAGGTGCCGCGGC
TGACTTTGCTTGTGCTGACTTTGCTTGTGCTGGGCGACCTCCCTGCGTGC
AGGGCTGCGTCTTTGCTCTGGTTGGCCTTTTGCCGTTGTGCTCCTTTGGC
TGCCTGGAGAGAGGGGCAACCCTGTAAGGAGGGTGAGAGCCCCTTTTCTC
TGCACCTGAGGGGGGAAACGGAGCTCCCCGAGCCCCCAGCCCGGCCGCCC
TGTAAGCGGGGCAGGGCTTTTTCCCAGCCGTGGCAGCTTTCTGCCTGCTG
CTGGCCCCTGGCCAGCGTGACCCCCTGTACTCGGGGCGCGTCACAGCCTT
TGTCCCCGTAGCAGCCCTGAAGCGCCTCAGCGCGTCGAGGCCCCTGTGCC
CTCCCCACGGTGCGGTGCGGCGCAGGTCTGATGCTTCTGTCTCCTGCTGA
GCACTGGGGGTGGCTCCCTTGAGCCCTTTGGCTGCACGGAACTCGCTCCC
TCTTCTGGGACAACTGTCTCTCCCCTCCCTCCCTCCCTCCCTTGTCATTG
CGTTAGGTGGTGTGAATGAGCCCGGCGCGTTTGCGCTTTAGCCCCCCTTT
AGAAATAGAGCAGGGTAGCTTAGGCTTCCCAGGAGAGCCCGAGGAGCTCC
GTGCAGCCACAAGCCGGTCCCCAAAACGCTTGCGTGGACAAAGTGTCTGG
CCTCGCCCCTGCTTTCTGCGGAGGGCACGAAGCCGCTTAACGGTAGCGTG
GGCAACGTGACCCGCCTGTAGCCAGGGCCTGGGTCTGGGCCTAGGGTGCC
CTTTGTGCTGGTGAACTGGCAGCGTGCGGGCCCCTTAACCTGGGCACGTG
TCAGGAACTTGCTTGTCCCTTTTTCCCCAGGAGCAGCCCCAGGGCCCTGT
AAGCAGGTGGGGAGGCTGCTTTAGCCGGGTGACAGGAACGCCTGCGCCCG
GGCCTTTGCCCCTAAGCGGGGCGCAGGCCGGAGCCCGTGCTCCGTGGCGC
TTGTTGGGGGGTGCCGGGCTGCGGGGGGCGGCCCCGTAAGCGGGGTTGTG
TGCGCCCCCTGGTCTCGGCGGGCGGTTGGAGGGACCCCCTGTAATCAGGC
GGGTGTCCCTGGCCCCAGCCTATCAGAGGCGTGGGGCCAGGAGTGGTGGG
GCCGGGCGTGTGCCCTCCCTGTCGCCGGGGCTGGGCTCCCGGCCCCTGGG
GCCCCTGGGGTCCTTGGCCTTTAGGCCGTGAGTTGGGCTGCCTGACTGTG
GAGTCTGGTTCCTGTCGCCCTGGGGGAAGGCCGAGCTCCGTGGCTCCCTG
GGTGCGGACCGGCCTGTAAGCAGGCTGTGGGTCCGGGCGCCTTTGTGCGC
CCTTCAGCTGGCAGCCTGCGTTGAGCGCCCTCCCCGTTAGTGGGGAGTGG
GCCCGAATTGGAGAGAAGGAGCCTCCGTAGGCCTCGGGGACCAGGGCCGC
CCTGTAAGTCGGGGCCGGTGCTCTGGAGTCCCGGGCATTTTGCAGTGCAG
GCAGCGGCTGGGGCCGCCCTGTAAGCAGGGGTGCAGCCTCTTGCGCGCTG
CTTTGCTTTGTGCCCAGCTTCTTTTGCCCAGAGGGCCCGGCTCCCAGCGC
GGCGTTGGACTTTGGCGGACGTCGAGGTGGTGAGTGGAGCTGCAGTTGGG
GGCTTTTGGGCAGCTGTTGGGGGGTTCTGTGGGCGGTGGGCTGGCGCGAG
GGTCTCGATGCGGGGCCGGTGGGCGGCGGTTCCCTTTGGGAGCTGGAGCT
TGTCAGGCCTGAGTGCATCGTCCTCCACTGGCAGGAGCCGAGCGACGGCC
GGGCAAGGACAAGCTGGATGAGCGTCAGCTTCGAGGTCAAGAGTGGAACG
GCGAGGCAAGAGCGAGCTCGGAGCAGAAGAAGGAGCACGAGAGGCCCTCT
GGGCAAAAGGCCTTGGTGGCACGGCCAGGGCACCTTCAAGGTGCCGCGGC
TGACTTTGCTTGTGCTGGGCGACCTCCCTGCGTGCAGGGCTGCGTCTTTG
CTCTGGTTGGCCTTTTGCCGTTGTGCTCCTTTGGCTGCCTGGAGAGAGGG
GCAACCCTGTAAGGAGGGTGAGAGCCCCTTTTCTCTGCACCTGAGGGGGG
AAACGGAGCTCCCCGAGCCCCCAGCCCGGCCGCCCTGTAAGCGGGGCAGG
GCTTTTTCCCAGCCGTGGCAGCTTTCTGCCTGCTGCTGGCCCCTGGCCAG
CGTGACCCCCTGTACTCGGGGCGCGTCACAGCCTTTGTCCCCGTAGCAGC
CCTGAAGCGCCTCAGCGCGTCGAGGCCCCTGTGCCCTCCCCACGGTGCGG
TGCGGCGCAGGTCTGATGCTTCTGTCTCCTGCTGAGCACTGGGGGTGGCT
CCCTTGAGCCCTTTGGCTGCACGGAACTCGCTCCCTCTTCTGGGACAACT
GTCTTCCCCTCCCCCTCCCTCCCTCCCTTGTCATTGCGTTAGGTGGTGTG
AATGAGCCCGGCGCGTTTGCGCTTTAGCCCCCCTTTAGAAATAGAGCAGG
GTAGCTTAGGCTTCCCAGGAGAGCCCGAGGAGCTCCGTGCAGCCACAAGC
CGGTCCCCAAAACGCTTGCGTGGACAAAGTGTCTGGCCTCGCCCCTGCTT
TCTGCGGAGGGCACGAAGCCGCTTAACGGTAGCGTGGGCAACGTGACCCG
CCTGTAGCCAGGGCCTGGGTCTGGGCCTAGGGTGCCCTTTGTGCTGGTGA
ACTGGCAGCGTGCGGGCCCCTTAACCTGGGCACGTGTCAGGAACTTGCTT
GTCCCTTTTTCCCCAGGAGCAGCCCCAGGGCCCTGTAAGCAGTGGTGGGG
AGGCTGCTTTAGCCGGGTGACAGGAACGCCTGCGCCCGGGCCTTTGCCCC
TAAGCGGGGCGCAGGCCGGAGCCCGTGCTCCGTGGCGCTTGTTGGGGGGT
GCCGGGCTGCGGGGGGCGGCCCCGTAAGCGGGGTTGTGTGCGCCCCCTGG
TCTCGGCGGGCGGTTGGAGGGACCCCCTGTAATCAGGCGGGTGTCCCTGG
CCCCAGCCTATCAGAGGCGTGGGGCCAGGAGTGGTGGGGCCGGGCGTGTG
CCCTCCCTGTCGCCGGGGCTGGGCTCCCGGCCCCTGGGGCCCCTGGGGTC
CTTGGCCTTTAGGCCGTGAGTTGGGCTGCCTGACTGTGGAGTCTGGTTCC
TGTCGCCCTGGGGGAAGGCCGAGCTCCGTGGCTCCCTGGGTGCGGACCGG
CCTGTAAGCAGGCTGTGGGTCCGGGCGCCTTTGTGCGCCCTTCAGCTGGC
AGCCTGCGTTGAGCGCCCTCCCCGTTAGTGGGGAGTGGGCCCGAATTGGA
GAGAAGGAGCCTCCGTAGGCCTCGGGGACCAGGGCCGCCCTGTAAGTCGG
GGCCGGTGCTCTGGAGTCCCGGGCATTTTGCAGTGCAGGCAGCGGCTGGG
GCCGCCCTGTAAGCAGGGGTGCAGCCTCTTGCGCGCTGCTTTGCTTTGTG
CCCAGCTTCTTTTGCCCAGAGGGCCCGGCTCCCAGCGCGGCGTTGGACTT
TGGCGGACGTCGAGGTGGTGAGTGGAGCTGCAGTTGGGGGCTTTTGGGCA
GCTGTTGGGGGGTTCTGTGGGCGGTGGGCTGGCGCGAGGGTCTCGATGCG
GGGCCGGTGGGCGGCGGTTCCCTTTGGGAGCTGGAGCTTGTCAGGCCTGA
GTGCATCGTCCTCCACTGGCAGGAGCCGAGCGACGGCCGGGCAAGGACAA
GCTGGATGAGCGTCAGCTTCGAGGTCAAGAGTGGAACGGCGAGGCAAGAG
CGAGCTCGGAGCAGAAGAAGGAGCACGAGAGGCCCTCTGGGCAAAAGGCC
TTGGTGGCACGGCCAGGGCACCTTCAAGGTGCCGCGGCTGACTTTGCTTG
TGCTGGGCGACCTCCCTGCGTGCAGGGCTGCGTCTTTGCTCTGGTTGGCC
TTTTGCCGTTGTGCTCCTTTGGCTGCCTGGAGAGAGGGGCAACCCTGTAA
GGAGGGTGAGAGCCCCTTTTCTCTGCACCTGAGGGGGGAAACGGAGCTCC
CCGAGCCCCCAGCCCGGCCGCCCTGTAAGCGGGGCAGGGCTTTTTCCCAG
CCGTGGCAGCTTTCTGCCTGCTGCTGGCCCCTGGCCAGCGTGACCCCCTG
TACTCGGGGCGCGTCACAGCCTTTGTCCCCGTAGCAGCCCTGAAGCGCCT
CAGCGCGTCGAGGCCCCTGTGCCCTCCCCACGGTGCGGTGCGGCGCAGGT
CTGATGCTTCTGTCTCCTGCTGAGCACTGGGGGTGGCTCCCTTGAGCCCT
TTGGCTGCACGGAACTCGCTCCCTCTTCTGGGACAACTGTCTTCTCCCTC
CCTCCCTCCCTCCCTCCCTTGTCATTGCGTTAGGTGGTGTGAATGAGCCC
GGCGCGTTTGCGCTTTAGCCCCCCTTTAGAAATAGAGCAGGGTAGCTTAG
GCTTCCCAGGAGAGCCCGAGGAGCTCCGTGCAGCCACAAGCCGGTCCCCA
AAACGCTTGCGTGGACAAAGTGTCTGGCCTCGCCCCTGCTTTCTGCGGAG
GGCACGAAGCCGCTTAACGGTAGCGTGGGCAACGTGACCCGCCTGTAGCC
AGGGCCTGGGTCTGGGCCTAGGGTGCCCTTTGTGCTGGTGAACTGGCAGC
GTGCGGGCCCCTTAACCTGGGCACGTGTCAGGAACTTGCTTGTCCCTTTT
TCCCCAGGAGCAGCCCCAGGGCCCTGTAAGCAGTGGTGGGGAGGCTGCTT
TAGCCGGGTGACAGGAACGCCTGCGCCCGGGCCTTTGCCCCTAAGCGGGG
CGCAGGCCGGAGCCCGTGCTCCGTGGCGCTTGTTGGGGGGTGCCGGGCTG
CGGGGGGCGGCCCCGTAAGCGGGGTTGTGTGCGCCCCCTGGTCTCGGCGG
GCGGTTGGAGGGACCCCCTGTAATCAGGCGGGTGTCCCTGGCCCCAGCCT
ATCAGAGGCGTGGGGCCAGGAGTGGTGGGGCCGGGCGTGTGCCCTCCCTG
TCGCCGGGGCTGGGCTCCCGGCCCCTGGGGCCCCTGGGGTCCTTGGCCTT
TAGGCCGTGAGTTGGGCTGCCTGACTGTGGAGTCTGGTTCCTGTCGCCCT
GGGGGAAGGCCGAGCTCCGTGGCTCCCTGGGTGCGGACCGGCCTGTAAGC
AGGCTGTGGGTCCGGGCGCCTTTGTGCGCCCTTCAGCTGGCAGCCTGCGT
TGAGCGCCCTCCCCGTTAGTGGGGAGTGGGCCCGAATTGGAGAGAAGGAG
CCTCCGTAGGCCTCGGGGACCAGGGCCGCCCTGTAAGTCGGGGCCGGTGC
TCTGGAGTCCCGGGCATTTTGCAGTGCAGGCAGCGGCTGGGGCCGCCCTG
TAAGCAGGGGTGCAGCCTCTTGCGCGCTGCTTTGCTTTGTGCCCAGCTTC
TTTTGCCCAGAGGGCCCGGCTCCCAGCGCGGCGTTGGACTTTGGCGGACG
TCGAGGTGGTGAGTGGAGCTGCAGTTGGGGGCTTTTGGGCAGCTGTTGGG
GGGTTCTGTGGGCGGTGGGCTGGCGCGAGGGTCTCGATGCGGGGCCGGTG
GGCGGCGGTTCCCTTTGGGAGCTGGAGCTTGTCAGGCCTGAGTGCATCGT
CCTCCACTGGCAGGAGCCGAGCGACGGCCGGGCAAGGACAAGCTGGATGA
GCGTCAGCTTCGAGGTCAAGAGTGGAACGGCGAGGCAAGAGCGAGCTCGG
AGCAGAAGAAGGAGCACGAGAGGCCCTCTGGGCAAAAGGCCTTGGTGGCA
CGGCCAGGGCACCTTCAAGGTGCCGCGGCTGACTTTGCTTGTGCTGGGCG
ACCTCCCTGCGTGCAGGGCTGCGTCTTTGCTCTGGTTGGCCTTTTGCCGT
TGTGCTCCTTTGGCTGCCTGGAGAGAGGGGCAACCCTGTAAGGAGGGTGA
GAGCCCCTTTTCTCTGCACCTGAGGGGGGAAACGGAGCTCCCCGAGCCCC
CAGCCCGGCCGCCCTGTAAGCGGGGCAGGGCTTTTTCCCAGCCGTGGCAG
CTTTCTGCCTGCTGCTGGCCCCTGGCCAGCGTGACCCCCTGTACTCGGGG
CGCGTCACAGCCTTTGTCCCCGTAGCAGCCCTGAAGCGCCTCAGCGCGTC
GAGGCCCCTGTGCCCTCCCCACGGTGCGGTGCGGCGCAGGTCTGATGCTT
CTGTCTCCTGCTGAGCACTGGGGGTGGCTCCCTTGAGCCCTTTGGCTGCA
CGGAACTCGCTCCCTCTTCTGGGACAACTGTCTTCCCCTCCCTCCTCCCC
TCCCTCCCTTGTCATTGCGTTAGGTGGTGTGAATGAGCCCGGCGCGTTTG
CGCTTTAGCCCCCCTTTAGAAATAGAGCAGGGTAGCTTAGGCTTCCCAGG
AGAGCCCGAGGAGCTCCGTGCAGCCACAAGCCGGTCCCCAAAACGCTTGC
GTGGACAAAGTGTCTGGCCTCGCCCCTGCTTTCTGCGGAGGGCACGAAGC
CGCTTAACGGTAGCGTGGGCAACGTGACCCGCCTGTAGCCAGGGCCTGGG
TCTGGGCCTAGGGTGCCCTTTGTGCTGGTGAACTGGCAGCGTGCGGGCCC
CTTAACCTGGGCACGTGTCAGGAACTTGCTTGTCCCTTTTTCCCCAGGAG
CAGCCCCAGGGCCCTGTAAGCAGTGGTGGGGAGGCTGCTTTAGCCGGGTG
ACAGGAACGCCTGCGCCCGGGCCTTTGCCCCTAAGCGGGGCGCAGGCCGG
AGCCCGTGCTCCGTGGCGCTTGTTGGGGGGTGCCGGGCTGCGGGGGGCGG
CCCCGTAAGCGGGGTTGTGTGCGCCCCCTGGTCTCGGCGGGCGGTTGGAG
GGACCCCCTGTAATCAGGCGGGTGTCCCTGGCCCCAGCCTATCAGAGGCG
TGGGGCCAGGAGTGGTGGGGCCGGGCGTGTGCCCTCCCTGTCGCCGGGGC
TGGGCTCCCGGCCCCTGGGGCCCCTGGGGTCCTTGGCCTTTAGGCCGTGA
GTTGGGCTGCCTGACTGTGGAGTCTGGTTCCTGTCGCCCTGGGGGAAGGC
CGAGCTCCGTGGCTCCCTGGGTGCGGACCGGCCTGTAAGCAGGCTGTGGG
TCCGGGCGCCTTTGTGCGCCCTTCAGCTGGCAGCCTGCGTTGAGCGCCCT
CCCCGTTAGTGGGGAGTGGGCCCGAATTGGAGAGAAGGAGCCTCCGTAGG
CCTCGGGGACCAGGGCCGCCCTGTAAGTCGGGGCCGGTGCTCTGGAGTCC
CGGGCATTTTGCAGTGCAGGCAGCGGCTGGGGCCGCCCTGTAAGCAGGGG
TGCAGCCTCTTGCGCGCTGCTTTGCTTTGTGCCCAGCTTCTTTTGCCCAG
AGGGCCCGGCTCCCAGCGCGGCGTTGGACTTTGGCGGACGTCGAGGTGGT
GAGTGGAGCTGCAGTTGGGGGCTTTTGGGCAGCTGTTGGGGGGTTCTGTG
GGCGGTGGGCTGGCGCGAGGGTCTCGATGCGGGGCCGGTGGGCGGCGGTT
CCCTTTGGGAGCTGGAGCTTGTCAGGCCTGAGTGCATCGTCCTCCACTGG
CAGGAGCCGAGCGACGGCCGGGCAAGGACAAGCTGGATGAGCGTCAGCTT
CGAGGTCAAGAGTGGAACGGCGAGGCAAGAGCGAGCTCGGAGCAGAAGAA
GGAGCACGAGAGGCCCTCTGGGCAAAAGGCCTTGGTGGCACGGCCAGGGC
ACCTTCAAGGTGCCGCGGCTGACTTTGCTTGTGCTGGGCGACCTCCCTGC
GTGCAGGGCTGCGTCTTTGCTCTGGTTGGCCTTTTGCCGTTGTGCTCCTT
TGGCTGCCTGGAGAGAGGGGCAACCCTGTAAGGAGGGTGAGAGCCCCTTT
TCTCTGCACCTGAGGGGGGAAACGGAGCTCCCCGAGCCCCCAGCCCGGCC
GCCCTGTAAGCGGGGCAGGGCTTTTTCCCAGCCGTGGCAGCTTTCTGCCT
GCTGCTGGCCCCTGGCCAGCGTGACCCCCTGTACTCGGGGCGCGTCACAG
CCTTTGTCCCCGTAGCAGCCCTGAAGCGCCTCAGCGCGTCGAGGCCCCTG
TGCCCTCCCCACGGTGCGGTGCGGCGCAGGTCTGATGCTTCTGTCTCCTG
CTGAGCACTGGGGGTGGCTCCCTTGAGCCCTTTGGCTGCACGGAACTCGC
TCCCTCTTCTGGGACAACTGTCTTCCTCTCCCTCCCTCCCTCCCTTGTCA
TTGCGTTAGGTGGTGTGAATGAGCCCGGCGCGTTTGCGCTTTAGCCCCCC
TTTAGAAATAGAGCAGGGTAGCTTAGGCTTCCCAGGAGAGCCCGAGGAGC
TCCGTGCAGCCACAAGCCGGTCCCCAAAACGCTTGCGTGGACAAAGTGTC
TGGCCTCGCCCCTGCTTTCTGCGGAGGGCACGAAGCCGCTTAACGGTAGC
GTGGGCAACGTGACCCGCCTGTAGCCAGGGCCTGGGTCTGGGCCTAGGGT
GCCCTTTGTGCTGGTGAACTGGCAGCGTGCGGGCCCCTTAACCTGGGCAC
GTGTCAGGAACTTGCTTGTCCCTTTTTCCCCAGGAGCAGCCCCAGGGCCC
TGTAAGCAGAGGTGGGGAGGCTGCTTTAGCCGGGTGACAGGAACGCCTGC
GCCCGGGCCTTTGCCCCTAAGCGGGGCGCAGGCCGGAGCCCGTGCTCCGT
GGCGCTTGTTGGGGGGTGCCGGGCTGGGGGGCGGCCCCGTAAGCGGGGTT
GTGTGCGCCCCCTGGTCTCGGCGGGCGGTTGGAGGGACCCCCTGTAATCA
GGCGGGTGTCCCTGGCCCCAGCCTATCAGAGGCGTGGGGCCAGGAGTGGT
GGGGCCGGGCGTGTGCCCTCCCTGTCGCCGGGGCTGGGCTCCCGGCCCCT
GGGGCCCCTGGGGTCCTTGGCCTTTAGGCCGTGAGTTGGGCTGCCTGACT
GTGGAGTCTGGTTCCTGTCGCCCTGGGGGAAGGCCGAGCTCCGTGGCTCC
CTGGGTGCGGACCGGCCTGTAAGCAGGCTGTGGGTCCGGGCGCCTTTGTG
CGCCCTTCAGCTGGCAGCCTGCGTTGAGCGCCCTCCCCGTTAGTGGGGAG
TGGGCCCGAATTGGAGAGAAGGAGCCTCCGTAGGCCTCGGGGACCAGGGC
CGCCCTGTAAGTCGGGGCCGGTGCTCTGGAGTCCCGGGCATTTTGCAGTG
CAGGCAGCGGCTGGGGCCGCCCTGTAAGCAGGGGTGCAGCCTCTTGCGCG
CTGCTTTGCTTTGTGCCCAGCTTCTTTTGCCCAGAGGGCCCGGCTCCCAG
CGCGGCGTTGGACTTTGGCGGACGTCGAGGTGGTGAGTGGAGCTGCAGTT
GGGGGCTTTTGGGCAGCTGTTGGGGGGTTCTGTGGGCGGTGGGCTGGCGC
GAGGGTCTCGATGCGGGGCCGGTGGGCGGCGGTTCCCTTTGGGAGCTGGA
NCNTGTCAGGCCTGAGTGCATCGTCCTCCNCTGGCAGGAGCCGAGCGACG
GCCGGGCAAGGACAAGCTGGATGAGCGTCAGCTTCGAGGTCAAGAGTGGA
ACGGCGAGGCAAGAGCGAGCTCGGAGCAGAAGAAGGAGCACGAGAGGCCC
TCTGGGCAAAAGGCCTTGGTGGCACGGCCAGGGCACCTTCAAGGTGCCGC
GGCTGACTTTGCTTGTGCTGGGCGACCTCCCTGCGTGCAGGGCTGCGTCT
TTGCTCTGGTTGGCCTTTTGCCGTTGTGCTCCTTTGGCTGCCTGGAGAGA
GGGGCAACCCTGTAAGGAGGGTGAGAGCCCCTTTTCTCTGCACCTGAGGG
GGGAAACGGAGCTCCCCGAGCCCCCAGCCCGGCCGCCCTGTAAGCGGGGC
AGGGCTTTTTCCCAGCCGTGGCAGCTTTCTGCCTGCTGCTGGCCCCTGGC
CAGCGTGACCCCCTGTACTCGGGGCGCGTCACAGCCTTTGTCCCCGTAGC
AGCCCTGAAGCGCCTCAGCGCGTCGAGGCCCCTGTGCCCTCCCCACGGTG
CGGCGCGGCGCAGGTCTGATGCTTCTGTCTCCTGCTGAGCACTGGGGGTG
GCTCCCTTGAGCCCTTTGGCTGCACGGAACTCGCTCCCTCTTCTGGGACA
ACTGTCTTCCCTCCTCCCTCCCTCCCTCCCTCCCTTGTCATTGCGTTAGG
TGGTGTGAATGAGCCCGGCGCGTTTGCGCTTTAGCCCCCCTTTAGAAATA
GAGCAGGGTAGCTTAGGCTTCCCAGGAGAGCCCGAGGAGCTCCGTGCAGC
CACAAGCCGGTCCCCAAAACGCTTGCGTGGACAAAGTGTCTGGCCTCGCC
CCTGCTTTCTGCGGAGGGCACGAAGCCGCTTAACGGTAGCGTGGGCAACG
TGACCCGCCTGTAGCCAGGGCCTGGGTCTGGGCCTAGGGTGCCCTTTGTG
CTGGTGAACTGGCAGCGTGCGGGCCCCTTAACCTGGGCACGTGTCAGGAA
CTTGCTTGTCCCTTTTTCCCCAGGAGCAGCCCCAGGGCCCTGTAAGCAGT
GGTGGGGAGGCTGCTTTAGCCGGGTGACAGGAACGCCTGCGCCCGGGCCT
TTGCCCCTAAGCGGGGCGCAGGCCGGAGCCCGTGCTCCGTGGCGCTTGTT
GGGGGGTGCCGGGCTGCGGGGGGCGGCCCCGTAAGCGGGGTTGTGTGCGC
CCCCTGGTCTCGGCGGGCGGTTGGAGGGACCCCCTGTAATCAGGCGGGTG
TCCCTGGCCCCAGCCTATCAGAGGCGTGGGGCCAGGAGTGGTGGGGCCGG
GCGTGTGCCCTCCCTGTCGCCGGGGCTGGGCTCCCGGCCCCTGGGGCCCC
TGGGGTCCTTGGCCTTTAGGCCGTGAGTTGGGCTGCCTGACTGTGGAGTC
TGGTTCCTGTCGCCCTGGGGGAAGGCCGAGCTCCGTGGCTCCCTGGGTGC
GGACCGGCCTGTAAGCAGGCTGTGGGTCCGGGCGCCTTTGTGCGCCCTTC
AGCTGGCAGCCTGCGTTGAGCGCCCTCCCCGTTAGTGGGGAGTGGGCCCG
AATTGGAGAGAAGGAGCCTCCGTAGGCCTCGGGGACCAGGGCCGCCCTGT
AAGTCGGGGCCGGTGCTCTGGAGTCCCGGGCATTTTGCAGTGCAGGCAGC
GGCTGGGGCCGCCCTGTAAGCAGGGGTGCAGCCTCTTGCGCGCTGCTTTG
CTTTGTGCCCAGCTTCTTTTGCCCAGAGGGCCCGGCTCCCAGCGCGGCGT
TGGACTTTGGCGGACGTCGAGGTGGTGAGTGGAGCTGCAGTTGGGGGCTT
TTGGGCAGCTGTTGGGGGGTTCTGTGGGCGGTGGGCTGGCGCGAGGGTCT
CGATGCGGGGCCGGTGGGCTGGCGGTTCCCTTCGGGGGTCTNGAGCTTGC
CGGGCCNGNGNGCGNCGNCCCCCNCTGGGAGCAGGAGCCGAGCGACGGCC
GGGCAAGGACAAGCTGGATGAGCGTCAGCTTCGAGGTCAAGAGTGGAACG
GCGAGGCAAGAGCGAGCTCGGAGCAGAAGAAGGAGCACGAGAGGCCCTCT
GGGCAAAAGGCCTTGGTGGCACGGCCAGGGCACCTTCAAGGTGCCGCGGC
TGACTTTGCTTGTGCTGGGCGACCTCCCTGCGTGCAGGGCTGCGTCTTTG
CTCTGGTTGGCCTTTTGCCGTTGTGCTCCTTTGGCTGCCTGGAGAGAGGG
GCAACCCTGTAAGGAGGGTGAGAGCCCCTTTTCTCTGCACCTGAGGGGGG
GAAACGGAGCTCCCCGAGCCCCCAGCCCGGCCGCCCTGTAAGCGGGGCAG
GGCTTTTTCCCAGCCGTGGCAGCTTTCTGCCTGCTGCTGGCCCCTGGCCA
GCGTGACCCCCTGTACTCGGGGCGCGTCACAGCCTTTGTCCCCGTAGCAG
CCCTGAAGCGCCTCAGCGCGTCGAGGCCCCTGTGCCCTCCCCACGGTGCG
GTGCGGCGCAGGTCTGATGCTTCTGTCTCCTGCTGAGCACTGGGGGTGGC
TCCCTTGAGCCCTTTGGCTGCACGGAACTCGCTCCCTCTTCTGGGACAAC
TGTCTCCCCCCCCTCCCTCCCTCCCTTGTCATTGCGTTAGGTGGTGTGAA
TGAGCCCGGCGCGTTTGCGCTTTAGCCCCCCTTTAGAAATAGAGCAGGGT
AGCTTAGGCTTCCCAGGAGAGCCCGAGGAGCTCCGTGCAGCCACAAGCCG
GTCCCCAAAACGCTTGCGTGGACAAAGTGTCTGGCCTCGCCCCTGCTTTC
TGCGGAGGGCACGAAGCCGCTTAACGGTAGCGTGGGCAACGTGACCCGCC
TGTAGCCAGGGCCTGGGTCTGGGCCTAGGGTGCCCTTTGTGCTGGTGAAC
TGGCAGCGTGCGGGCCCCTTAACCTGGGCACGTGTCAGGAACTTGCTTGT
CCCTTTTTCCCCAGGAGCAGCCCCAGGGCCCTGTAAGCAGTGGTGGGGAG
GCTGCTTTAGCCGGGTGACAGGAACGCCTGCGCCCGGGCCTTTGCCCCTA
AGCGGGGCGCAGGCCGGAGCCCGTGCTCCGTGGCGCTTGTTGGGGGGTGC
CGGGCTGCGGGGGGCGGCCCCGTAAGCGGGGTTGTGTGCGCCCCCTGGTC
TCGGCGGGCGGTTGGAGGGACCCCCTGTAATCAGGCGGGTGTCCCTGGCC
CCAGCCTATCAGAGGCGTGGGGCCAGGAGTGGTGGGGCCGGGCGTGTGCC
CTCCCTGTCGCCGGGGCTGGGCTCCCGGCCCCTGGGGCCCCTGGGGTCCT
TGGCCTTTAGGCCGTGAGTTGGGCTGCCTGACTGTGGAGTCTGGTTCCTG
TCGCCCTGGGGGAAGGCCGAGCTCCGTGGCTCCCTGGGTGCGGACCGGCC
TGTAAGCAGGCTGTGGGTCCGGGCGCCTTTGTGCGCCCTTCAGCTGGCAG
CCTGCGTTGAGCGCCCTCCCCGTTAGTGGGGAGTGGGCCCGAATTGGAGA
GAAGGAGCCTCCGTAGGCCTCGGGGACCAGGGCCGCCCTGTAAGTCGGGG
CCGGTGCTCTGGAGTCCCGGGCATTTTGCAGTGCAGGCAGCGGCTGGGGC
CGCCCTGTAAGCAGGGGTGCAGCCTCTTGCGCGCTGCTTTGCTTTGTGCC
CAGCTTCTTTTGCCCAGAGGGCCCGGCTCCCAGCGCGGCGTTGGACTTTG
GCGGACGTCGAGGTGGTGAGCGGAGCTGCAGTTGGGGGCTTTTGGGCAGC
TGTTGGGGGGTTCTGTGGGCGGTGGGCTGGCGCGAGGGTCTCGATGCGGG
GCCGGTGGGCGGCGGTTCCCTTTGGGAGCTGGAGCTTGTCGGGCCTGAGT
GCATCGTCCTCCACTGGCAGGAGCCGAGCGACGGCCGGGCAAGGACAAGC
TGGATGAGCGTCAGCTTCGAGGTCAAGAGTGGAACGGCGAGGCAAGAGCG
AGCTGCGTTAGGCACTTTCCTTACTGAGGTCTTTTATTGACAGCGTTGTT
CTTTTTTATGTATAACGTCTTTTTTATATTTTGTATTGTTTCTTTTATGT
TGTTTNTGAATATAAATAAAAATTTAATTTTCATAATTTTTAATAATTTC
TTTTTTTATTATTTCCCAAGGTCGTTTTGTGTTTTATGGTCATGTGCCCA
ANTGGCCCCTGTGTGGTATTGCTATATCTTAGTTCTCTATATTTCCAACA
GGAAGAAATACTGATCATTTTAATCAAATGATCCCCAACGTGCAGCAATC
TTTCCCCAAATAGCAGTAAGAGGCCGTTNTTATTGTTATTGCTTTCAGGA
AAGAAAAAAGGAAAGAAAAATACATATGCTAAGACATGTCTCAGGTAATT
AGGCTTGGAGTTCCGAAATGCAAACGGCATTTTTCTCTAGATTTTTGGTA
CAATTTTATTACATAGGCTTCACTTGCACATCCACATATTAATCTACTGT
GTTTATCAGGTTTAACTGCACAGACACATCCTTGTCTTGGAGTTAGAAAT
AATCTTCAATTTACATTTTAGACTAGTAAAAATGGACTAGAAAGAGAGTA
CCAAGGATTAAAATGACTTCTATGGGTTTGCTTCTTGGGCCAATATTGGA
ACTGGTAATAACATCAAATTCTCCTGATTCCTGGTCTAGCATTATTAACA
GGCTCAACTTTATTTTAAACGGAAGTTGTTGGCAAGGAGACCAGCACCAA
GTCTAAAAAGTGTGTGTCTCACCTGAATGCGAATTTGCAGTCAGCCTTTT
GGTTTTGTATCACCATCATATAGCACCATAGAGATTTTTCAGGGTTTAGT
GTAAACAAATCATAATTGTGATAACTGGAGAATGACAATCTCTTGCCTGT
GTCTTAGGGAGCAAANTGAACTGAGCACAGGTGCGCAAAGGCTCCAGCCT
GCATCACAGGTACAGGTTCATCCTGACTAGTGAAATAAAAATCATCCTGA
CTAGTGGG
>oenMel5-308#Unknown
ACCTTTGGCTGCCAGGTTATGGNGATTTTTGGGGGTTTTTTTGGGGTGTT
TCTAGGGGGGGTTTTTTGGGAATTTTTTGGGGGGCTTTGTAATTTTAGGG
TTTTTTTTGGGAATTTTTTGGGGTNTTTTGGGGAATTTTTTTGGAAGCTT
TTGGGGATTTTTTTTGAGGATTTTTTTTTGGAAGTTTCGGGGATTTTTGG
GGAGTTTTTTGGGGAATTTTTTGGGGGATTTTNGTAATTTTGGGGATATT
TTTGGGGTGTTTTTTGGGTTTTTTTCTCACCTTTGGCTGCCNGGTTATGG
ATTTTCGGGGGGTTTTTTTGGGATNTTTTTGGGGGGGTTTTGGTAATTTT
NGGGGATTTTTTGGGGGTNTTTTTGGGGTATTTTTGGGTAGTTTTTTGGG
GTTTTTTTTCTCACCTTTGGCCGCCAGCTCCAGGTGGTTTTTGGGGTTTT
TTTTGGGGATATTTCTGGTAATTTTTGGGGATTTTTTGGGGGATTTTTTT
GGAGGTTTTTTTGGNGATTTTGGNAATTTTTGGGGATATTTTTGGGGTAT
TTTTGGGGGTTTTTTGGGGTTTTTTTTANTTTTGGGGGGATCTTTTGGGA
TTTTTGGGGGGTTTTCGGGGATTTTTGGGGGGATTTTTTGGGGGTTTTTT
TTTTTTTTGTTAATTTTNGGGGATTTTTTGGGGATTTTTTTGGGGTATTT
TTGGGGGTTTTTTGGGGTTTTTTTTTTTCTTACCTTTGGCCGCCAGCTCC
GGGTGGTTTTTGGGGTTTTTTGNAGGGATATTTTTTGNAATTTTGGGGAT
TTTTTGGGNTTTTTTGGGGGTTTTGATTTTTGGGATTTTTNGGGATTTTT
TGGGGGATTTTTGGGGGTTTTTTTGGAGGTTTTTTTGGGGTTTTTTTGGG
GGATATTTTTGGGATTTTGGGGGATTTTTGGGGAATTTTTGGGGGGATTT
TTTGGGGTTTTTTTGGTTTTTGGGTTTTTTGGGGGTTTTTTTNGGTATTT
TTGGGGGATTTTTGGGGGATTTTTTGGGGGATTTTTTNTTGGNATTTTGG
GGATTTTTTGGGGGATTTTTTTNGGATTTTTGGGGANTTTTTGGGGNTTT
TTTGGGGATTTTTTTTGGGGATTTTTTGGGGNTTTTTTGGGGTTTTTTTG
GAATTTTTGGGGATTTTTGGGGATTTTTGGGAATTTTTGGGGGTTTTTTT
GGGGTATTTTTGGGAGTTTTTTGGGGTTTTTTTCTCACCTTTGGCCGCCG
CTCCAGNTGATTTTTGGGGGTTTTTTAGGATTTTTGGGGATTTTATGGGG
GATTTTTTTTTGGGGTTTTGATTTTTGGGGGTTTTTTGGAATTTTTGGGG
ATTTTTTTGGGGGGAATTTTTGGGATTTTTTGGGGTNTTTTTTGGGGTTT
TTTGGGATTTTTGGGGGTTTTTTTGGGGATTTTTGGTNAGTTTTTGGGGA
ATTTTTGGGGGGATTTTTTTGGGGTNTTTTTTTTTAATTTTTGGCGATTT
TTGGGGATTTTTTTGGGNATTTTTGGGGGTTTTGTTTTTGGGGATTTTTC
TCCTTTGGCCGCCAGCTCCGGNATTTTTGGGGTTTTTTTGGGGATATTTT
TGGTAATTTTTGGGGATTTTTTGGGGATTTTTTNTTTTTTTTGGATTTGG
GATTTTTGGGGGTATTTTTGGGTTTTTTTGGGGNTTTTTTGGGNTTTTTT
TGGGGATTTTTGGGGGATTTTTTGGGAATTTTTGGGGGANTTTTTTGGGG
TTTTTTTTTTGATTTTTGGGATTTTTTGGGGATTTTTTTGGGATGTTTTG
GGGATTTTGGGGGGTTTTTGGGGATNTTTTTTCCTTTGGCTCAGGTGATT
TTTTGGGGATTTTTNNGGGGATATTTTTGGAATNTTTTGGGGAATTTTTT
GGGGNATTTTTTTTGGGTTTTTCGGGATTTTTGGGGATTTTTTGGGGGTT
TTTTGGGTTTTGGGTGTTTTTGGGGGGTTTTTGGGGGGATTTTTTGGGGT
TTTTTTNTAATTTTTCGCGATTTTTTGGGGGTTTTTTTGGGATTTTTGGG
GTTTTTGGGTATTTTTTTGGGTTTTTTGNCCTCTTTGGCCGCCGTTTTTG
GGNTTTTTTTGGGGATATTTTTGGTAATTTTTGGGGATTTTTTTGGGGAA
TTTTTTTTGGGGATTTTTGGGGTAATTTTTGGGGATATTTTTGGGATTTT
TTGGGGTTTTTTAGGATTTTTGGGGGNTTTTNTGGGAATTTTTGGGGAGT
TTTGGGTAATTTTTGGGGNATTTTTTGGGGGTTTTTTTTTTTTATTTTTG
GCNATTTTTTGGGGATTNTTTTGGGNATTTTTGGGGGTTTTTTNGGGGAT
TTTTGGGGTTTTTTTCTTNCCTTTGGCCGCCACTTCCACGTGGTTTTTGG
GGGTTTTTGGGGATTTTTTTGGGGATTTTTTTNGGGACTTTTGGGTATTT
TNGGGGANTTTTTTGGGTNTTTTTGGGGANTTTTTGGGATTTTTGTTTGG
GGTGTTTTTGGGGATTTTTGGGGATTTTTGGNAATTTTTTGGGNGATTTT
CTTTTTTCTTTGGTGTTTTGGGATTTTTTGGGGGNTTTTTGGNTTTTTTT
GGGGTTTTTTTTTGGCCGCCANTTCCGGTGGTTTTTGGGGGGATTTTTTG
GGGATTTTTTGGGAATTTTTNNTGGTTTTTTGGGGAATTNTTTTTGGGTG
TTTTTTGGGGTTTTTGGGGATATTTTCGGGTTTTTGGNGTTTTTTTGGGG
GNTTTTTGGGGATTTTTCTCATCTATTGCAGCCAGGTCCAGG
>oenMel5-5676#LTR/ERVK
GGCTTGGGTTTTGCCCCAGGCTGCCACAACAAGCCCGGATAAAANGTTCC
GTAAGGAACAGCTTTTCCTGGCTGCTTCAGGCAGATTTCAGCCACAAGGT
GCTNGGATGCAAGCAAGCCTAGANTTTAGGCTATCAGCTCTTTTGTGATT
TCATCTTCGCTTGCAGCACCTTCTTAGCCAGCAAAGAGAAGAGATCGAGA
AAGCTGCACAGAGGTTCCGCAGGCAACTTTATTTCTTCTACGAAGGGGTC
CGGCAGCAGTCCGAGTACATAGGGTATCAAAGGGGCTTTTATAGGGTTAG
GGTGCTTAGAAAATGAACCAATAATATCAAGGATTGAAAACTATCCAACT
ACTTNAAGGTTTTAGGTAAAAATGACCAATCACCTAGAGAATTGAAAAAG
GACCAATNAAANCNCNAAAAGATAAAGCAGGGGTCTGCAGGAGGGGGTGA
ACATNTCTCTAGCATNAGTCATTCTAAGGAAGCAATTTCTTATCTAAGGG
ATGANTTTCCAGGGAGGCCCTGTCAGGGTTTCTGCTCC
>oenMel5-5253#LTR/ERVK
GGAGTCAGNGAGTCGGGGGTCTCTGAATTCTTCAGGGAGAAATCAGAGTG
CAGGGATTGAATTAAAGCCTGTGGATGGATTGAAGTGTATTAAGCCACTC
ACACATAAAGTAGAGGTGTAAGTTTAAGTTAGAAGTGAGTCAGTAAGTTT
TAGNGTGAGCTCTAATGCTTTTAGTAAGTGAAAGGTTTCAAATGCCAGAG
TAGCAGTGTGAGTTCTAGTGAAGGTTGAAAACATACTGATGTCTTCAGTG
GAGGCTCCAGGCCCGCAGTTGTAGACAGGACTTAGACATAATAGAGCTAT
AGTAAGAATATTGCTNACATTTTTCAGATAGAACAAGATAGGTTGTATGC
GTAGTCTATACGTAACCTGGTGTGCTAAGAAACTGGAATTCTAATAGGTT
AAGGAGTGNNGGTCCGAGTTTGTGTCTTAGCTTGTTGGGAAGATCCTATA
TAAGAGTNTGTACTGGGGAGAGTTGGTGCTTTTAGCCATTGCTTTTAGCC
ATTCGCTTATTGCCGCTGCTTTGCCATTGCTTCTGCCATTGCTTTCTGCA
TTGTCTTTTGAGACTGATGTGCTTTGTAATAAATAACCTTTTTAAACTAT
TAGCTGCTTCGCTTATTTAAGATAACCCGACGAAGTAGGAGCCAAGAGCT
CCGGAGTCTACAGGAGCTGAGAGCTCCGGAGCTGCAGGGGATGGCNNCTT
CCAGCC
>oenMel5-765#Unknown
GGGGGCCGGGACCATGCGGCCGGGCCGGGCCCCCCGCAGAGCCGGGGCCG
GGGTCCCGAGCCGGGCCCCCGCAGAGCCGGGGCGCCGGGCCGGGCCCCCG
GCAGAGCCGGGGTGCCGAGCCGGGCCCCCCGCAGAGCCGGGGCACCGGGC
CGGACTCCAGGCCGAGCCCAGAGCCGGGCCGCAGCCCCCGGCCGGGGACC
A
>oenMel5-366#LTR/ERV1
TATGATGTGCTCCTCCCTGCCNCCCGGCCCGACCTTTATTTCCCATAACC
CTGCTCAAGTNACGACCAGCAGTGGTGCTCCTAAAGGATGCGTCTGGCCG
TGGTGGCTGCATCTGGCTCGAAGTGGATTCGGGGGAGACAGATAACAACA
ATAGCCGAGGGCTANTTTGAGAAACGCATTCACCTAACCACAGTGCTGGT
CAAGGTCCGACTCAAGCCGAGCNTGGGANAAACTAACATCTGTAGTCGGT
ATGCAAATATGACTATGANTCAATCATCTTACTCCATAAACAGTGACAGC
CCAGGGCCCGCTGAGCTCTCCTGCACAGCAGCGGGCTGCGTGCCAGGATC
TCCCCTGAGCAGGGACGCCTCTCAAGGTTGCTCCTCGAGGCTGAGAGATT
CCTTATCGCANCAGATACTCAGTAAGTGAATTGGAATAGCGCGCTGAAAC
TTCGAAATCTTAGCTGATACAAAGGACTGATTGTGCACATATAATCCTTT
AGACACAAACCGTTGACTAAGTCTGGATCCAGCTGCACACAAACTCCCCT
CTGAGAAGGANTTANAGCGCGAGGGGGTCCTTTCTGAACCTCATGACTCA
ACGGGAGGGTCTCCCTGACAGTTTTGTCTGACCCTGTCCTCTATGCAGTA
AATAATCAAGTGTACCTTGCCATCGAATCTTGTTAAACCACCGTCGCATT
TACTATCAAACTTTATTAACCTGTTTATATCAATAAAACATATTGCTGCT
TCTCTCTTACGAGTGAAGTGCATCACTCCATCCACAA
>oenMel5-3037#LINE/CR1
AGCACTTAAGCAGCCTGTGGCCAGGGCTCGAGGCCTCCCAGGATTGTGTG
CCCACTCAGGCCATGGTCACTGGGCCCCCTCAGGCTTTGAGGCCAGCACA
GCGCAGCAGGAAGGGAAGCAGTTCTCGGGGGAAGCTTGGAAAGCGCTCCA
AGTCTTCGCCATGCCTCCCCCAGGTGCCAGCCATGGTGAAAAGCATTCAC
CAGAGAGTGACATCCCAGGGCACTTTAGATGCCAGGCTGCGCACTGACAT
TCTGAGGCTGGCTGGAGAACACCCTGCTGACGTGGTGCTGACCCTCCTGC
GCTGTGCCCCAACGTGTGACAGGTACGGGGCCCACGGGCCTTGAGAGCTC
AGGGCTCAGCAGCCTTTAGGGCCCATCGCCCTGTACAGCCTGTCCTGTGG
GGTCTGCAGGAAAGGTGGAGAGCTCCAGGACCCTCAGGCCCCTCTGTTTC
CTGAGCCTGCTGCCACTGCCAGGCTCCCTCCCTGCCTCTCAGGGCACTGG
GGCTCTGTCACAGCTGCACAGGACATGGTACTGTGACTGAGACCCCCCTG
ACACCGAGCTCCAACCCCACAGAGCTGCTGCAATGATTTGGAGAGCCATA
GGCTCATCAGGACCAGCAGTGGAGAAGGTGCTGCCAAGTCTGCTCTGTGT
GATGGAGGACTGGCCTCTGCACAGCATGTTCACCTCGGATGGAGACAACA
AAAATGTTTTTGCCCTGGCTGTGAGTTTCTGGAACTGGCCCTTGCTCCCC
CCCAGGTCACCTCTCCAGCAGCTCTCCATCCTCTCTGTGCCTCGGGTGCT
GGGCTGAAACCTGGGCTAGGGACAGGCTCAGGGGGCACCAGGCCCGCTGC
TCCCCCTGCCTCTCCCCTCGGGCCCTGCCCCATGGGCACCTCGGCACTGA
GCGCTGCCTGGGGCTGCTTCTTTCACAGGCAACTCTGGTGCTCTGGGTGA
TGGTCCAGGTGCCTGAAAGCCAGGAGGCAATGATCCTTTATTCCTCCCGC
CTGTTTGTGGCTCTGCTCTTCCATGTTGTCATCACCACACAGCAGATGCC
ACCAGAGGAAGTTGATAACTTTTGGAGAGTGTGCCAGGAGCAACACCACT
TTTCCAGCAAGCCCAACAGGTCCCAGCCCTCCAGTCCTTCCCATGCCCTG
GTGGCCTGCACCAGTGCTCCCAGTGTGACCTGGACTTTGCTCTGCACACA
GGTTTGCACTGCAGACACTGAGGTCCCTGCTCTGCCGACTACAGTGTGAC
AATGTGGTGATGGCCATGGAGTGCAAGCGTGGCTGGGACACGCTGCTGTG
TGCTGACACCCAGCACTATGCTGTGGGTCTGCTGGCCAGGTGAGACCCCC
ATTGCCCCTCTGTCCCCAACATTTTTGCTGTGTGCCCCGGGGTGCCCCAC
ACAGTACCTGTGCTCATGGGCCAGAGGGCCTTGTCACCGAGGGACAGATA
AGCAGTTTGGAAAAGGCTGGGAGAGGAGGTGCCCAAAAGCAGCCAAATTT
TAGAGCACCCACATCCCCTCCAGGGTGGTGGGAAAAGACCAGATATCTGT
CGGTCAGTCTTGGGAGTGGTTTGCCTCCCCTGCCTCAGAGTCTTGGTTAC
TTTTCCAACCTTGCAGGGAGATGCGCCATTTCTCCCTCTCCTTCTGTTCT
GGGATTGCACGCCGCCTGCTTGGGCAGCTCAACAGGGAAGAGCCACGCTG
GGACCTGCCTTTCCTGGCATTCCTTGTGGAGGTGAGCCTGATGGCCAGCG
CTGCCTCCCTGAGCTGCCTCCCAGCTCTCTGTCCTCTCGTAGCCACAGCT
GCCTGGGACGGTGCCCGTGCCCTGTGCTGCTGTCTGGGCCCGGCCCTGTG
CGCTTCTGGGCTCCTGTGTGTCCCCTGTCACTGCCCTGTGCCTTTCAGGT
CCTCGAGTGCCTGGATTTGAGTGAATGTGGTGACAGCATCCTTGAGATCA
TGTCAAGGTTCCTGCGGAGCAATTCCAGGGAGAGGCGTCGCCTGGCGCTC
AGAGGCCTTGTGCTGCTCAGCAAGGATCCCTCACTGGTGAGAAGGGGGCA
GCGGCCGAAGCTGCGCTGGGGAAAGCAGCCCCTCGGGCTGGCTGGGCTTC
AGGAGCTGAGGCAGATGCTCCCAGCTCTCCTGCCTCACCTCCCTGAGCTC
TTTGGGACAGGCCTTTGGCCGCTGGGCCCTGCGGCAGCAGGGTGAGGTTG
CAGTGCCAGGGCGGTGTTGGCGCTGCAGCCGTTCATGGCTTCACAGCACA
GCCTTGTCTTCCACACAGGCCAGAAAAATGTGTAGCCTGTCTCAAAGCCT
CCAGGAGCTGCTGGGTAATGCAGATAGAGAGGTGGTTGGCATGACCCTCC
GTGTGTTCACCAGTGTACTCCAGAACAAAGACATCCTGATATNCATGCAG
GACTGCTGTATCCTGAGGGAACACTGCTGGGACCCCTTGACCTGTAAGGC
TCTGCATTCTCAGCCACGGTCTCAGCTGCTGCTCAGAAACGTTGTACCCT
GTGGATTATTTGGGCCATGGTTCAAGGGGGCTGGAAGAGTTGGTGCTNAN
GTCTTCTCCTTTCCCCCAGGACAACAGCCATGTGCAGNTGCTCTCCNTCG
AGCTNTTCTGCAAGGTGATGGAGCTGNTAGTAGATGAGGGAAAAAAGGCC
CTTAAGTCAGTTGTGTGCCAGAGCCTGCTCCCACTNTTCATCCACTGCCA
CGACGAGAANCGGCGTGTGGCGGAGGTGAGGANTCGTGGGNTGCCCGTGT
CCCCCTGGGAGGGGCTCGGCTGCCTCCTGCCCTGGCGCCTCGCGGGCTGC
AGCCTCCTCCAGGCCTTGGCACAGGGACGCGGGTCCTGTGCCCCGAACTG
CGGGGACATCTCCGCATCTCTGCTGCTCTCCAGGCCGCTCGGGAAACGCT
GCATTGTGCGGCCAAACTCCTGAGGAGGAGGAATCTCGAAGACTGCTGAA
GAAAGAGCGGCCGTGAAGTTCGCCGAGTGCCTGGTAAGGACGGCCTGGAA
GCGCCAGGCTCAGGCTGGAGCAGCCCCCTGAGCGCGGCGCTCACTGTGTG
CGCTCGGCAGCCGCGGCCCTGCCCAGCGCCGCACGCAGGGGCCGCACGGG
CTCTTCTCCAGGCTCCTGCGGCCCCGAGCCGGCTGCCCACGGAGCCCCGG
CCCAGCGGGGCTGCGGGCCGGGCCGGCACCGCGGCTCCCCGGGCGCAGCC
GGCCCTGTGCCCCTGCAGAGCCCGGCCCAGCGGCTGCTGGCCGCGCTCAG
GGCTGTGCGGGCAGGGGAGGCCGGGGCCGGGCGCGGGCAGCGCCTGCCAA
AGGGCCGGAGCCCGCCCCGACCCTTCCCTCCCGCCGCTCTCTGCAGCTGG
CAGAGGACAGGAGCCGAGCGGCCGAGCACCTGCGCCAGGCCCTGCGGTAC
CTGCGGAGCCCACAGGAGCCCCTGCGAGAGGCGGCCGTCAGGTTCATGGG
TGAGCCCGGGCTCCCTCCCCGCCCCGCCGCAGCTCGGCCCCAGCCCCGCC
TGCTGCCCCGGCAGCTCTGCCATCCGGGCCCGGCGCCGTGGAGCCCCGGC
TGCCCTCGGGGCTGCTGCCGCCCTCTCGCAGCCGTGCCCTTGGGCGGCAG
CGTGCGGCGAGGGCCCGGGCTGAGCCCCGCCGGGCCANGAGGGCNAGCGG
CCGCAGGGCTGGCAGCGCCGCNGGCAGGGAGCTGTGCCGCTGGGCAGAGC
CGTGACAGGGTCTGTGTTCCCAGGGATGGCCGGGGNACTCTGAGGGGAAG
AAGGAAGAGCTCCAGGTGCTCAGTGAGGGTGAGTGAGGGCAGCGGGCTGT
CAGCGGGGCTGGCAGGAGGAGCTGCAATCCCTGCCCCGGCTGCGGAGGGC
TCCGCTCCCTGTGCGGACGGGGGGCGGCGTGGGCAGAGCACAGAGAGATT
TCAGGGGCACGGGGGGATTCGTGGCCAGCANCTTNCAGCTCATNCCGCTG
GTCCCTCCTCTCTTGCGGNCATGGCAAGAGCTGGCTGGGATGGCCCTGGC
AGGAAGGTCTCCTTGGATTCCCACAGATCCGGGCTCTGACCGTGGCTCTG
TTCCTCTCCTCTTCCAGCCCTTCAAGCCCTGAGGAGAGATGACAGCCCCT
CCAAGACAAACNTAGTTGTNCAACAGCTATTCAGCGAAAGAGCTGCTGCA
GAACCAAGCTCATCTGCAGGCTCAGAAGAACCAGCGTCCCATTTAGACCT
CCAGATGCCATGGAAGATGAGGCTGCCTTGAGACCAGAAGAGACCAGCTG
GAGCTCCAGGCACAGCTGATGCCTGTGGCAAGCTCGCGTGAGCTTCAGCC
GTCTCCCTCCTTGTAGACAGCTCTCTCCCTCCAGCCCTCAGACCCTGCCC
ATCCCCTNTTTTNCCTCCCAGCTACTCCTCCCTTTTGACTGCTCCCTCCC
TCCAGCCCTCAGACTGTGCCCATCCCTTTTTTCCCTNCCATCTCACTCCT
CCCTNCTGGCAGCTCCCTCCCTCCANCCCTCAGACCCTGCCCATCCCCTG
TTTTNCCTCCCAGCTCATCCCTTTGCTTTGCCTTCCATCAATAAACAGTT
TGGCTTCTTCACTTTGCCCGCATCTCTGTGGAGCCNAAGCGGCGCAAATC
CGGAGCCCTGGGACACACAGGCCCCTCCTGCCGTTCTCTTCCGCGCCGTG
CTTTGNGCAGAGACGCAGAGNAACGAGGGCAGATCAGGCTGGAAAGGTCN
CTGTGCTGAAGNTCCAGTTCCACAACACCGTGGAGTCCAAGGTCTTGCTG
AGCACCCTGAAGCCCCTGGGTTTTAGAAGAGCCAACCTGAGTATGCTCNG
AGCCCAGCTGGGAGGGATTCCATGGCAAGCACCCATGGAGGGCAAAGGAG
CTTGGAATGCTGGAAGGNTTCAAGAANAGCTTCCTGAAAGCACAGCAATG
CTCCATCCCTGCACAGGGTCAGGAAGAGGGCAGAACCAGAGAGCACCAGG
GCTTNACAGNGAGCTTTGGGTGTNCCAGAGAGCAAATGAAGCAGCAGCAC
AGTGCCCGAGACTCGGGCGCGTGACCGTGCCAGTGTCCGGAGCGCTGCCA
GGCAGTGCCGGGATCCTGGGTGCGGNTCTGGTCCCCACAAGTGAGGAATG
GCAGCCCCTGCCTCAGAGCCAGTCAGAAAGCCAAGCAAGTGGGACCAGAG
GGAGGGCACCCTTCCAGTCTCTTGGGCATGGCTGCAAAACAGCCCCTGCT
TCTTCTTCCTCTTTCNCCANTTGTGCTGATGGCAGAGCCAGCCCCAAAGC
CTGTGGAGAGCGGGCATGAAAAGTGCTGCGTGCACNGCGGAGAGTCCTGG
AAGGTGCTGGCGAGAGCACTCCTGTGGGAACAGGGCTCTGGTCTCTGGCC
GGGAACAGCCTGGTTTTGCTGCTGTGACCGCAGGCGGGAGTTGAGGCGGG
TGAAGAGGCAGCGGGCAGCTCGTGTCTGTAGGGGGCCCGGGGCCGCGCGC
CCGGACCTNCACCTGGAAACACACTTGGGGAAACACGAGCTAGAGCTGGA
GTGCCTGTTCTGGAAGGCCCAGAAGTAATTCAGCCTTGCCAGGGTTTCTT
AAGNGTGTGTTGGTGTTCCCAGGGAAAGCTACACATTTGGGGAAATGCCT
TTGGAGAAAACGGGCTTGCTTCTTAAGGAAGGTGCTTCCCAAGGAGCTCC
CAGTGAGGCAGGTGCAAGTGTCCCCCTTTGGCTNTCTGCGGTCCTTTCAG
TCCCTGAGGCCCGTTGCCCTTGGCAGAGGGGCAGGGGAAGGGAGAAGGCT
GTGAAGAGCAGNTTTGGCATCTGCCTGGACCTGCGGAGACCAAGCCAAGC
ACCTGCAGCAGGGTGTGTTACCCCCCGCGGAGCGCAGGGGTGG
>oenMel5-2238#Unknown
TGGCTACACTCAGGAAAAAAAGATGTTTCTCCTTTTTTTTTTTTTTTTCT
TTTTTTTTTTNGAGCAGTCTAAAACTCCTAATNTTCCCCACTGCAATCAG
ACACACTCCTCAGGTGTGTGCCAGCCCAAGGTGCCACCAAAACCACCCCA
GAGCTGCCCTGGGCCAGCTGTGAGGGTGGATCATCATCCCAACCTGCACT
GGCCACTGCCAGGGGCTGTGGCCATGGACACTGCACTGACCCCACTGCTG
GGTTTGGGGGCCACGGCAACCGTGAGAAGTTCAAGTTTCCTTGGAAACAC
TGGGGAGGACTGGGACATACTGGGGAACACTGGGAACCCTGTGGGANACA
CTGGGACGTACTGGGGGTGATACTGGGAAGNACTGGGACGAACTGGGGAC
ACTGGGGTAAGTGGGGACACTCTGGGGGACTGGGAGGGACTGGGGGTAAA
CTGGGAGCACTGGGGGGGACTGGGACGNACTGGGGACGAACTGGGNNGCA
CTGGGAGGGACTGGGGGACACTGGGACTTACTGGGCTGTACTGGGGACGA
ACTGGGNTGTACTGGGAGGGACTGGAGGGGCACTGGGCGGTACTGGGCTG
TACTGGGATGAACTGGGCNGTACTGGGAGGGACTGNGGGGCACTGGGGTT
GNACTGGGCCGTACTGGGGATGAACTGGGCTGTACTGGGAGGGACTGCAG
GGGTTGAATGGGCTGTTCCCGCCTCTGCCGCCTCCCATTTGCCGAGGACC
CTGCCCATCACCGCCCGCAGCCAATCAGCGCCGGGGATCGGGGCCTCGGG
GGGTGTTCCTGGTGTCGGCGCCATCTTTTCTTTTTGCCTCTAACTCCCAT
CATGCCCCGCGGCCCGATAGAGCCTCATTGGAGCGCCTAAAACTCTTGCC
GTGCCCTGTGCCCTAAGGAGCCCGGTTAGAGCTCCTCGAGCTCCCCCCAA
GTGCTCCCGAACTGTATATGTTCCCCCCGAGGACCTCAAGTCGTGGCTTG
GATGCAAAAGTGTCTCCCAAGTTCATTCCTGGACCCCCAGATGCCCCGTC
CGAGCCACTTCCGGGACTACAGCTCCCATCATGCTCTGTGGCGAANATAA
ACAACCAATGCAACAGTGCCTACAACTCCCGTGATGCTCCACGGCCCCAT
TAAACCGTATTATACCCGCGCCTACAACTCCCATCATCCCCCGCGCCCCA
GAGAGCCCCGTTAGAGCCCCCCAAGTGCCCGCCCGGACCCCGAAGGGCCC
CAGATTCCCCTCCCTGACCTCCAAGTGCCCCCCTGGACCCACAAGTGCTC
CCCCGCACCTNGAATTGTCCGTCAGAATCCCTCAGTGCCCATCCAAGTGC
CCACCCGGCTCCCCCAGGTGTCCTCCGGACCCTCAAGTTCCCTCTAAATT
CCATCCCCAGACCCAAAACTGCCCCAAATGTGCCCCAGAAATGTCTCCCT
GGACCCCGAAGTGCCCCCTTTGACCCTGCCTGAGAACAAGANGATAAAAA
AGATGACAAACGGACTAAAAATATTACNAATTATCATAATGAGAGAGGGA
AAAAATAACCAATTATAGCTTAATTAATAAATTAAGGGAATTGTGTTACT
TAGAACCAATGAAGATTAATTTCCTTGGCTGTAAAAAATGTATAGATTTT
TTAATANAAATATAAAAACTAAGTAATAGAAAACATATTTAAATAATTAT
ATAATAAATAAATTTAATAATTAAATATTAACAATAAAGAATAAAGTAAT
AGTTTTTTTTATTATGTTTTGG
>oenMel5-20#LINE/CR1
GAAGACACCAAGTTGGGTGGGGTGNTGATCTGCTGAGGGNTAGGAAGGAT
GCTCTGCAGAAGGTCTGGATCGATGGGCCGAGGCCAACGAGCCAAGTTAG
GTCAAGCGCCGAGCGCTGCAGGCTTGGGGCAGGGCGGCTGGAAAGNTGCC
CGGCGGAAAAGGACCTGGAGGTGCTGGTTAACAGCGGCTGAACACGAGCC
AGCAGGTGGCCAAGAAGGCCAGTGGCACCCGGCCTGTATCAACAATGGTG
TGGCCAGCAGGGATCGTCCCTCTGTACTCGGCACTGNTGAGGCTGCATCT
CGAATCCTGTGTTCAGTTTGGGTCCCTCACTACGAGAAGGACATTGAGGC
GCTGGAGTGNGTCCAGAGAATGGCAACAGAGCTGTGAAGGGTCTGGAGCG
TGTCAAGTTGATGAGGAGCAGCTGAGGGAACTGGGGNCGTTTAGCCTGGA
GAAAAGGAGGCTCAGAGGAGCTTCATCACTCTCTACAACTACCTGAAAGG
AGGTTGTAGCNAGGTGGGGGTCGGCCTCTTCTCCCAGGCAACAGGACAGG
ACAAGAGGAAATGGTCAGANCGGCTGGGGGAGGTTCAGATTGGACACCAG
GAGGAATTTCTTCAGCCGAAAGGGTTGTCAAGCATTGGAACGGGCTGCCC
AGGGAAGTGGCGGAGTCACCATCCCTGGAGGTGTTTAAAAATGTGGACGT
GGCACTTGGGGNCATGGTTTAGTGGTGGACNTGGCGGTGCTGGGTCAANG
GTTGGACTTGANGATCTTAGAGGTTTTTCCAACCTAAATGATTCTATGAT
TCAAGGCTNTCCTTCTTATTACAGGCAAT
>oenMel5-1315#Unknown
AGCCCGAAATCCGGCCAAAATCCCCCGGAATTGGGTCAAAATCCCCTGGA
ATTGGCCCCAAAATCCCCTGAAATTGCCCCAAAANCACCCCAAAATTGCC
CCAATTTCATGCAACAATGNACCCAAAATNACCCAAAACATCCCAAACGT
ACCAAAANCACCCCGAAANAACCCCAAAACCGACCCCAAAACTGACCCCA
CGAATNTATCCCGAATCCTGTAAGCNACCCCAAAACATCCCAGAACGACC
CCAAAATACCCCAAAATCACCCCAAAACTGACCCCGNAGCTCGCGTACTC
CNTGTGNCCCAAAGTGCCCCAAAACATCCCAAAATANCCCAAAAATAACC
CGAACCCCAAAANANCCCAAAATTACCCCAAAANCACCCCAAAACTGACC
CNAAATCCAGAAACCCCAAANACACCCAAAATACCCCAAATCACCCCAAA
ACACCCCAAAATTANCCCAAAACTGNCCCCGCACTTCTACATCAATGGCG
CGGACCAGGTGACCCCAAAAACACCCCAAAATATCNCAAAGCACCCCAAA
AATCCACCCCAAAACCACCCCAAAACTGACCCNAAATCCCCAGCCGCCCA
AAACTGCCCCAAAATACCCAAATCCCNAAACTGACCCCAAAAAACCCCAA
AACTGCCCCTGCANTTCAACGGCGCGGACCAAGTGANCCCAAAATNACCC
CAAAACTGACCCCGAACAAACCCAAAACCACCCCAAAATGTCCCAAAATC
CGGACCCCAAAACTGACCCCAAAATCCACCCCGGAACTGACCCCGAACCC
CAAAATCACCCCAAAATACCCCAAAGGTGCGCGGANCCCAAAACTACCCC
AAAATGACCCCATAANTCACCAGACTGCGCCCCAAAATATCCCAGAACAT
GACCAAAATAACCCCGGGAACCCAAAATATCCCTAAAAANACCCCAAAAT
ATCCCCAAAATCGACCCCAAAGCTCGAATCCCTGCGCCCCCGGGACCACC
CCAAATCCCAGCGACCCAAAGACCCCAAAATATCCCAAAACCAGNCCGGA
ACCCCAAAAATACCCCCGAAACACCCCAAAANCGACCCCGNAGTTCCTGC
AGCCCGACCCCAAAATATCCCAAAAATAACCCCAAAAATACCCCAAAATA
CACCTCGGACCCAAGGTATCCCAAAATACCCTCGGACCCCAAAAGACCCC
AAAATACCGTCGCTCATACAGCCACGCCCGAAACCGCCCCAAAATATCCC
GAAACACCCCAAAATACACCCCGGACCCCAAAATTCGGGACCCCAAAANT
GACCCCAAAACCCCAGAACTCACCCCAAATTCNCCCAAAATCCCCAA
>oenMel5-54#DNA
ACCCCCACTTTATAAATAGGATATGAGGANNAATTAAGGTCTGTAANNAC
TAAAATTCAATGAGAGCACCATANAAAAATCCCACGAGGAAGTTCATTTG
TTATTCAGNGCAGGGTTTGNATGGCGTGCAGTAAATAAAGCACGGGGCCA
CANACTGAACGATGAGGATAAAAAGAAATATTGAANAGCTGCTCATTCAG
TGAGCACCGTCCATCCTGTGCACTGAATGAGGCAGTCCTGCGGAAAAAAT
AGTGTGACAGCGTAATTAAAGACCGTGTCACAATGCACAGGTGTACAATT
AAGACCGGCAAACTTAATTCTGNCATTTCCTAACTTCNGAGTGCTTGACT
TAGCAACCTTGTTCTTTTANCGTGNTTTTTGCATAA
>oenMel5-3064#Unknown
GGCTGACCAATAAACCCCTAAAATGGAAGAAGGCTCAGAGGAGATGGGCA
AGGGCGATGTGCCCGTGAAGCTCAGGGAATAATGTAGAGTGTGACTGACC
ACAGCTGTTGCAAGGAATTTCTCAACACAAAGGGGACCAGACTAAGGAGG
CCTTTGTTTTAGATAAACAGCTAGTGGATCAGCTGGTTGTGTAAATGTTT
GTCCCTGAGTTNATCAAAAGAGTGTGAATGTCTCCCTGAGTTAGCCAGAC
CAGCACGTGGGGAGTGNATACATAGCTCAGCCCAACGCAGAGTATAAAAA
AACTAGCAAAATNAATTTTGAAGAGAGCAACGGGCTTGAGCTGGCTTCAA
CCCATNCATTCCTTCCTACTGGGGACGCCCAGCGTCGCGACGGNGAGCAT
ATAGAGACCGGTAGTGGGAATCACATTNGTATTGTGATCGAACTGTGTAC
TGCAATTGCTATGCTTTTTAAATAATTTGTATTGTGTTTTCAATATTTTG
TATCACTCTGCTAAATCAGAAATCCCGTGTAACATCAANTATCTTCAAAT
AAGTAAATTTNATATTAAACATTATACCCTCCACGTGTGGAATATCTAAA
AGAACCTGGTCAGAGAGTATTGGACC
>oenMel5-78#LINE/CR1
ATTTTAAGGGCGGCTACAAAGAGGATGGAGACTCTCTTTTCAAAGAAGCC
ACGTGGAGAAGACGAGGGGCAATGAGTANAAATTACTCCNGGGGACANTC
TNATCTTGATCAAAANGAAAATTTTTTCAGTGAGAACAATCANCCGCTGA
ACAACCTCCCCAGGGANGTGGTAGATTCCCCANCGCTGGANATTTTTAAG
ATNCGGTTGGACAGGGTGCTAGATAATCTTGTCTAGACCGTCTTTTCCAA
GAAAGGTTGGACCAGATGATCCTTGAGGNGTCCTTCCGACCTGGTATTCT
ATGATTCTATT
>oenMel6-18733#LTR/ERVL
TTCCTATTAAATTGTATTTCTGACTTGGAGTCTCTCACTGGTTTTGCTTT
CAAAACCAT
>oenMel6-23#LTR/ERVL
TTTCGGCTGGGATAGAGTTAATTTTCTTCATAGTAGCTGTACGGGGCTGT
GTTTTGGATTTGTGCTGGAACAGNGTGATAACACAGGGATGTTTTNGTTG
TTGCTGAGCAGNGCTTACACAGAGCCAAGGCCTTTTCTGCTTCTCACCTC
CCCAGCGAGGAGGCTGGGGGTGCGCAAGGAGCTGGGAGGGGACACAGCCG
GGACAGCTGACCCNAGCTGACCAAAGGGATATTCCANACCATATGGCGTC
ATGCTCAGCATATAAAGCTGGGGAAGAAGGAGGAAGGGGGGACGTTCGGA
GTGATGGCGTTTGTCTTCCCAAGTCACCGTTACGTGTGATGGAGCCCTGC
TTTCCTGGGGATGGCTGAACACCTGCCTGCCCATGGGAAGCGGTGAATNA
ATTCCTTGTTTTGCTTTGCTTGCGTGCGCGGCTTTTGCTTTNCCTATTAA
ACTGTCTTTATCTCAACCCACGAGTTTTCTCACTTTTNCTCTTCCGATTC
TCTCCCCCATCCCACCGCGGGGGAGCGAGCAGCTGCGTGGTGCTTGCTGC
CGGCTGGGGTTAAACCAC
>oenMel6-11370#DNA/PIF-Harbinger
TGATCCAAAGCCCACTGAAGTCAATGGGAGTCTTTCCACTGACTTCAGTG
GGCTTTGGA
>oenMel6-4118#Unknown
TGTCAAAATNACATGGATGGGATTCGCTGANTACATGCAGACGTTTACAA
TGTAGACATCTACATCTAAATNAGTCACTCACTGGTCCTTTTACAGTCAA
TGGAGAGAAATAGGCACTTCTAGGACGTGATTCGTCTCATCCTAANGTAG
ACGTCTAAAATAGGTCAGATGAATCATACCCTAAAAGTGCCTATTTCTCT
CCCTTTATGCTCAGTGGAGAGAGTGACTAGCTCAGATGCAGACGTCTACA
TTGTAGACGTCTAAAGTTAGGTGAGATGAAC
>oenMel6-567#LTR/ERV1
AGTTGAGTATCGGTATTAGACCAATACTCNTATTTTGGTAAATC
>oenMel6-871#LINE/CR1
ACAAGGGGGAATGGCTTCAAACTGACAGAGGGCAGGTTTGGATTGGATAT
TAGGAAGAAATTCTTNCCTGTGAGGGTGGNGAGGCNCTGGCACAGGTTGC
CCAGAGAAGCTGTGGCTGCCCCGATCCCTGGAAGTGTCCAAGCCAGGTTG
GACATGGGGCTCGGAGCAGCCTGGGNTAGTGGAAGGTGTCCCTGCCCATG
GCAGGGGGTTGGAACTGGATGATCTTTAAGGTCCCTTCCAACCCAAACCA
TTCCGTGATTCTCACTGTATCACTCTTCCATGCGAACCGCAGCCCCCCTG
GGAAAGGGCCNTNNCAGATTTAGCGCAGGATGCACATCAAGGTTTAGTAA
>oenMel6-566#LTR/ERV1
CACTAATCTTAGAAAATTAGGATTTTAGTTACCTTGCTGAAAATAATTAA
>oenMel6-265#Unknown
TAATGATACTGAAATTATTTCCAATTGCCCCAGTGAGAAGAACACCAACT
TGCAGGCATCAAAAGCTCCAAACTCGTTTAATTGAGGCAGGTCCAAGGAA
AAACCCAGCCATGCCAGGCTGAGGCTGGAGCCCGCTCATAATTCATTGTT
GGTGTCTGCTGCAGTCTAGGAATAGCTCTCTCATTTGTCACTTGCTTGAT
CTGCTTTTATATCCCTGATTCAAATGGAGTTAGGCAAACTTCATGTTTGC
TATTAGGCTATGAAGAAGCCTATTGTAACCAGCAAATGCTTTTCTTAGAT
GGAAATGTGCATGCAAAATACAAAGAGCTTTGATACTGAGATTTTTTTTT
TCCCCCCCCCCGAGGTTCAAGTATTTTATCATTTTAATAGCATTCCATTT
TCCTGTTGCACTCATTTTTAGAGTGCATCTTTTGTATTAGCTCTGAGTAN
CATAATTCCTTCCAAATTCCTGTGGCACTATTACCATAACTACGCAATTA
GCTACAGCTGGATGTAGCAGAGGTGAACACTAAATAGTTTTGTTGGCAGG
AGGCTCAGTGTCTTTTAACCCAGACACCTTCTTTACTGATGCCTGGTTTG
TTACTCTGCTTTAGGGAGTATGGGGAACTTCAGATACAAAGAAGAGAATT
TAAAAGTTATAATTGTACAAGTTTGTTATGCAAAAAGGTGCTGAAGGTGC
TGTGGATTTGTTTTGGATTGTTATTTGTGTTTTGTTAGGTTTTTTGTTTT
GTTCTGTGGTTTTTTGTTTTTTTGTTTTTTTTTTTTTTTTTTTTTTTTTT
TTGTGTGTGTGTGTGTTGGGTTTTTTTTTTTTTTCCCGCCTATCCTTCCC
CTAGCTTGAAGAAACTTGAAGAAGGAATTTGGATTATAAAAACAAGCTGA
GAAGAGCATCAGTGTGTTCACTGGCAGCACGGGCTGGGATGAGGGCTGAG
CAGGACCCAAGCTGCAGCACNTCAACCATTCAGCTTTCACCTCATGTTTT
ATCACGGCCTTTATGAGACAGATGTGAATCGATGAGTCCCAGGCCGAGCC
GTGCCCGTGCCCCGTTCTGTCGGAGCTGGTGCTTTCCTGACAGGTTCAGC
AGCCACACTCTGTAATAAATACTCCTGGGTCTGCTGCTGTTCCTCTTCCN
GCTTTATATTCAATTTTCCACCCCTTCTCTCCTCTCTGTCCGCTGTGTCT
TTTGTGTTCCTTTCTTGGCCTGTGTGCTCCCCATCCCATTCCCTTTCACT
GCTTCACTCTCTCTTGTTCTTCTTTTTCTTTTTTGAAATGAATACTCAAT
ATTTATGTAATATCTCTTACTCAATCCCTCTCCCTGTTCTGTCCTACTTT
TTGCCTCTCTCTCTGTCTCACTTGCTGCCTGCATCTTTATTTCTCCTTTC
TTCCTCTCCTTGTCCCTCAGTCCTGCACCGTGACTGTGTTTCTTTGTCCC
TGTCACTGTCCCTTTGCCTGTACCTGTGTGCACCTGCTGCCCAGTGCTCC
TCCCTGACCGTCCCCTCTCTTGGTGAGCCTCTGTCCTGCTGGCCGTGCCT
CTCTGTCTCCGTCCCTGTGCTGCTCCTTGGCCGCGTTTGCCCGCCCCGGC
ACGTGCCGCGGTCGATTCCTCTGCGGGTTCTTGTTTCCCTCTTTGTATCC
CTCAGTCCTTGCTGCGTGTTTGGCACCGTGTTTCGTTCTGCGTCCTTCTC
CGTGCCTCGCTCGTGTTCCTGTTTTATTCTGTGTGGCTCTGTGGAGCTCC
CCGTGCCGGTGGTTCCCACGGGTGTGTCCCATTTGCTGTCCCTGTTCTTT
TTTAATCCCTCTCTGTGTGCGGCCCATTCACCATCCCAGGTGTTTTTGGG
TTTTTTTTCCATTTCATCCTGCGCCTTGATCTTAGTTTTCTTGCTGTGTC
CTCTCTGCTGGCGCTTCCTCTTCTGCCCCTTGTTGCCTGTGTCTGCGGGG
CTGAGAAGGAACTTCAGCCCTTCTGGGGGCTGTCCCCCACTTCCTTGCGT
GAGCAGAGTCCCTTTTTGGGGGGATGGACCGTGGGAAGGGTTCGAATAAA
GTGCCGTGCTCCTGCCCGAGGCAGTTGTAGTTGTTGTGTGCCTTCTTTGG
GGGTGAGGAAAAAAGGCTGAGGGGGACAGGGGGTGGAGACTCGGGGGCTC
CCGTGTCCTTTGGGGCACCCCAAGGTCCCGAGGAGAGGGAGCCACGCTGC
GGTGAAGGAGCAGGTGAGTGGGGAATGGGGGGGTGGTGCCGGGTGCCGTC
CCCCAGAGGGACCCAAGAGTGCCAGAACATTCACAGGGAGGGCTGGGTGT
AGAAGGCAGGAAAATATAAATATAAAAAATACCTAACTACAGCTTAAATA
AATGTTTTATTTGGTTAGAGAAGGGTTTTTTAATAGATAATCTAAATATA
AAATAAAAATAATAGAAAAATAAAAATATATTTATATAAATATAAAATAT
ATACAAATAGAAGTAACAACTTTATATTAAATATATAAATAATGCAAATA
TATAGTGTATGAATATAAATTATATATATGAGATTAGAAATACGCAAATA
ATATAGTTTAAAATAAATGGTTTTTTTTGTTTTATTTGGTAAAGGCAGGT
TTTTTTATAATTAATATAAGCAAAATAAATACACAAATATACAATAAGTT
TATAAAGACATAAAAGTAGAAGTATTTGTGCATACATGAATATATGTAAG
TAAATACATAAATATATAGATCAATATAAATGTAGGATATAAATAATATA
TACTTCTGGTATAATATATTTATAATATAGATACATTGATTGCAGACATA
AAAATGAAAAATATAAATAGAAACATTTAAATATAGTTTAAAATAAAGGG
GTTTTTTGTTTGTATTTGGGTAAAGGTGGGGCTTTTAAATAAAATTNGAA
ACATACACATATATAATATATAAAGATATATGCATAAAATAGAAATGAAT
TTTAACAATATAAATATTATGTGTACAATAAATAATAAAAATAATATTGT
ATATATGTTATAATGCAACCTTAATTGAAAATATAAAATGTGTATAGATT
GTGAATGTGAATATAAATTAAATATTAATAGATTTTTATTTAAAGGGGTT
TTTTTATTATTTGCTTTTAGTTTTGGTCGGGGTGTTTTGGGGGCATTCTT
TTAGGAGGATTTTTTGAAGGGATGGGACTCGTTGCTTTTTGCCTTCGCTT
CTCTCTCTGTCCCCAAAGCGCCGCAGCCCCGGGCTGAGCTCG
>oenMel6-371#SINE/MIR
TGTAACACACTTTTGGAGAGTTTACTTTTTTTTAGACTGAAGANCAGCTG
GAAATGTCCTGAGGCCATGGTCTAGTGGTCTGAGCTTGGGAACTGGGAGC
CAGGAACTCCTGAGNTCTAATCCCGGCTCTGACACTGACTCCCTGTGTGG
CCTTGGGCAAGTCACTTAACCTCTCTGCCTCAGTTTCCCCATCTGTAAAA
TGGGGATAATAATGCTTG
>oenMel6-8740#DNA
TTCCCCTTCTTACTNCTTGAGATATTTGCATGAGAACAGGATCTCTGTTC
CTTAGGGGTTCATCTGCTCCTGCTGCTTATTCCTCACCTGAAGTCATAAT
CCTCTGTGACATCACAATTGGCTGCTGTGGAAATGATTATGATGTCACAA
ACAGAGGATTATGACTTCAGGTGGAGAATAAGCAGCAGGAGCAGATGAGC
TCTTTAAGAAACAAAGATCCTGTTTTCATGCAAATGTCCTTAGTAATAAA
AAAAAGGAGGAGAAAATGCATAGAAAATGTCTGTAGAATTGAAGTTTTTC
AAGAGGCGTCAGCNGCTCTTTAATCCC
>oenMel6-2088#LTR/ERV1
ATCCACGTCCTTGATGTCCTGGTCACACAGCCCTGGCCCCTTGTCCCTGT
GTCAGGCTCTGGGGTTGATTTGTGGAACATCCTTGGGGGAGGCTGTGGCT
CCAGGTGGACCNGGGGGATACAGAGGGACAGGGGACCCTGCTGGGCATGA
ACAGCATTGGAATTCTCTGGGGAAACTGTGAGGGGGGCTGGGGCAGAGTG
ACCAACCCAGTGACCTCACACAGCCCTGCTGGGATGTCACAGAGCCCCCT
GTGAGGTCACAGTCTGCTCTGTCATGGCACAGACACACCCTATGATGTCG
TAGCTGCTCAGTGACCTCACATAGCCCACTCTGTGATGTCATAGCCCACT
CTGTGATGTCATAGCCCACTCTGTGACCTCATGTTACCAGATGATAAATT
GCCCACNCCTGGTGAGNTAACACAATGCTTGTTCTCCAAAACCACTGGCC
TNTGGAAACCGCACAATGCCCGTTGTGTAAGAAGGGGAACTGGAATTCAC
CAGCCTCAGTGTCCTGCCAGCTCAGCCAGGCCGACTGGAACATTGGGGTC
CACGACCACCAGGGACCACCAGAGAGACCCCCAGGACAGAAGAACACATG
NGTAAAGGGGAGGGGAAATATGTTAATGATCTNGGGGAAATGATTATCAT
ATGTGTGTTTANTCCGGGANAATCAATGGATATGTGTGCAAAACACAGNA
TATAAACAGAAACTTTCCTGTACTCAGCATGCACAGCTTCAGGAGGAGCT
GTCCCCTGTGCATCCAGCCGAATAAAGAATGCTGCTTCTTAATGCTGCAT
TGGTGTTAAGGAGTTTTTTATNTTGCCGAATTTTTGGCAACACTGCCACT
TCCCAGGAAAGCTCTGTC
>oenMel6-1412#Unknown
AGGAGCGATTCAGNTGCCTAAACACAGGCATCTAGTGCCATTTTAGACGC
CTGAGGTATCCGAGATCCGCACGGGGCTGGCAGATGTGACACAGGACCTA
TGGGAGACCCGCGCCCTTCTGGAGCGGCAGCTGGAGGCCAGGCGGGATAC
CCTNAGGCATCTNAAATGGCACTAGACGCCTGTGTTTAGGCAGCTGAATC
CCTCC
>oenMel6-16573#LTR/ERV1
CAATCCGACTCTTCCCCCGGTCCGTATGGTCCCAGTTCGTACAATCCCGG
TCCGTATGGTCCCAGTTTGTACAATCCCAGTCCGTGTGATCCCAGTTCGT
ACAATCCCACTCATGGCCCTGATCCCGATCCCAGTCCTGGTCCCGATCCC
AGTCCTGATCCCAGCCCCGATCCCGATCCCAGCCCTGATCCCGACCCTNA
CNCTGATCCCAGNCCTGATCCCAGTCCCAGTCCCGATCCCGATCCTGATC
CCGATCCCAATCCTGATCCCGATCCCAGTCCTGATCCCAATCCCGATCCC
AGTCCCGGTCCCGATCCCGNTCCCGATCCCGATCCCGACCCGATCCCGAT
CCCATTCCCAATCCTCCCTGATCCCGATCCCGATCCCAGTCCTGNTCCCG
GTCCCGATCCCGATCCCAATCCCGATCCCAATCCCGATCCCGNTCCTGAT
CCCAGTCCCNATCCCGTTCCCANTCCCGATCCCGATCCCGTCCCGATCCC
GATCCCGTTCCCATTCCTCCCCGATCCCGATCCCGNTCCCATTCCCGATC
CCGNTCCCGTTCCCGATCCCGATCCCGTTCCCANTCCCGATCCCGTTCCC
AATCCCCGATCCCNTTCCCATTCCCGATCCCGTTCCCANTCCCGTTCCCA
ATCCCAATCCCGATCCCGATCCCATTCCCAATCCCGATCCCGTTCCCATT
CCCTCTATCCCTCANTCCCGATCCCGTTCCCGTTCCCGATCCCGATCCCG
TTCCCAATCCCAATCCCGTTCCCGTTCCCANTCCCGATCTCGTTCCCGTT
TCTGATCCCGATCTCATTCCCGATCCCGATCCCGATCCCGNTCCCAATCC
CTGATCCCATTCCCAATCCCATCCCAATCCCNATCCCGTTCCCAATCCCG
ATCCCGTTCCCGATCCNATCCCCAATCCCAATCCCGNTCCNATCCCGATC
CCAATCCCATTCCCGATCCCGNTCCCAATCCCGATCCCGATCCCGATCCC
AATCCCGATCCTCCCTCCCGATCGTGATCCCAAT
>oenMel6-24127#LTR/ERVK
GCGGGCGCGACACGCAAGACACGCACTACACTTCAGAAGGCTAANATCTG
TTTATTACAACAGCACGCTGTCTTTTATACACTCTACAAAGTTTACACTT
TNTTCATTGGTTACAATAGATCAACATAACGTTCATTGGTGTAAAACCAT
CTCCACCTCTGTTTTTCCCAAGACTTTTCTAAAAATACTTTTCCCAGCTG
CAGGTTTCTTCTTGCTTATCTTCTTCTTCTTCTTCTCTTCTCGGTCTCCA
TGCCAACAGCCTTGGTCAGAGAATACTTCTCAGAAACAAACCTCATTCAT
TAACCCTCTCTGGCCCACAGACCAGCTGTGGG
>oenMel6-9630#LINE/CR1
CAGCAGCGCAGCCTCAGACGGAGAGAAAAGTAATGATGCAGAAAAGGCAA
GAAGTGTTCAATAAATATTTCTGCTCCGCATTTGGAAAGAAGGCAGGATG
ATGCGCTTGTATCACACGAGGACGATGAAGTACTTTCCAGTCCATTAGTA
ACCAAGGAAGATGTTAAACAGCATCTACTAGAGATAAACANTTTTAAATC
AGCAGGCCCGGATAACTTNCACCCAAGAGCCCTANAAGAGCTGGCTGAGG
AGCTCTCTGGCCTACTGATGTTAATTTTTAATAAATCTTGGAATACCAGG
GAAGATCCAGAAGACTGAAAGCGTGCNAATGCTGTGCCAATATNCGAAAG
GGGCAAGTGGGATGNCCTAATAGACAGGTTGGCTTGCCTGCCATCAGCCA
TGGTAAAATAATGGAAAANCTACTGAGATTCANTCAAAAAGAATTAAAGG
ATGGGAACGTAAACTNATGTCAGTCAACGCGGTTTTATGGAAAACAGGCC
TTGTCAAACAAATCTGATTTNCTTTCTGAGAGATTACAAGTTTGGTTGAT
AAAGGTAACTGCNTAGATGTAATATACTTATGGTTTTGTANAGCATTCGA
CTTATCANCGCATGACATTCTGATTANAAAATTAGCACTGCANTACGAAA
TAAAGCACGTTAAATGGATTAAGACCGGCCAATAGGGATCTCAAAAAGTA
GTTGTCAGCAGGCGAATCATCGTCGAATGAGGATGANTTCCACNGGGATT
CCACAGAGGCCAATCCGAGCGCTATATTCAACATTTTCANCAATGATCTG
GAAGNAAATATAAAATCGCTGCTGATAAA
>oenMel6-15304#RC/Helitron
CCGGCTGGAAAATCCCGGAATTCCAGCTTGGAAAATCCCGGATGGAAATC
CCTGGATGGAATTCCGGGATTCCCGGATGGAAAATCCCGGCGGAAAATCC
CGGAATTCCCAGCTGGAAAATTCCCGCTGGGAGAATCCAGGGAGAAAATC
CGACTGGGAGAATCCGGAATATCCCCTGGAAAAATCCAGGANAATCTTGG
GAATATCCCGGAATCGCCCGGGAAAATCCGGGAAAATCCGGGATAGAAAA
TCCCGAGGAAAATCCCGGAATTTCCAAGAAACCCCCGGGAAATCCGATGG
GAAATCCCACAGGAATCCCCCGGGAAATCCCGGAAATCCCAGTGGAAAAT
TCCACGGAAAATTCNGAACGGAAAAAATTCCCGGTTGAAAAATCCCCGCT
GGGAAAATCCCAGGAAAATCCGGGAATTTCCANCCCGGAAAATCCGAGCC
GAAAATCCCAACCGGAAAAGATCCGGAATTCCCAGATGGAAAATCCTGGT
TGGAAAATCCCCAAATTCCTGGTTGGAAAATCCAACTGGAAAATCTCGGN
TGGGAAATTCCAGAGGGAATCCCAGAATTCCCAGCTGGAAAATCCCGGAT
GGAATCCCAGAATTCCCAGCTGGAAAATCCCGACGGGAAAATCCAGGCTG
GGAAAAAATCCCAGAATTCCCATCTGGAAAAAATCCAGACGGGAAATCCC
AACTGGAAAATTCCAGTTNGAATCCTGGAATTCCCAACTGGAAAATCCCG
GCTGGAAAATCCCGGAANTCCCGCCCGGAGAATCTTGGAATTCCCAACTG
GGAAAAATCCTTTTTTTTTTTTTTTTTTTTTTTTTTTGAAATCCCTGCCT
GCGAGGAACCGGGAACTCGGGAATTTTTGGAATTTTGGGAANATTGGGAA
TTCCAGTCTTCCATGATTTTGATGAATTTCCAAAGAAAGGAGAAGAATTC
CCGGTTTTTCTGGGATTTTTTGTGGGATCCCAAAGAATTCCTGGGAANAA
TTTCGAGGATTCCGGGGATCGAACTCATCAGGGGGGGAAAAACCGGGAAT
TCATGGAAACAAAATGTGATATTCCCAAAAAAATAAAAATATTTTAAAAA
AAAATTAAAAAAGGAAGGGNAGGAGATTTTGGGAATTCTGAGGAAGCTTT
GGGAATTTTGGGATCATTCCTCCCAAATATTTTGGTGACATTTTAGATTT
TGGGACGGGAATTTCTCGGAAAAGTCCAGAAAAATTCCGTGGTTTTTTTC
CCNCCTCCTCCCCCATTCCAGGATCTCNTGTCCTGCCANGTGGGACCNAG
TCCTNGGATATCCCGAAGGGTTCCCAAGGATTTCTGGGAATAAAAACCGG
GAAAACCTCTGGAATTCCCAAAAAAAAAAAAAAAAAAAAAAAAAAAAGC
>oenMel6-1721#LINE/CR1
TTGCAAACGTGGCCTCAGCAGATGAGCCTGTGGGCTACGGCCTGCCCCAG
CCCCACATAAGGAGGACATTGAGCTGCTAGAATGAGTTCAGAGGTGTCAG
AGGGAGCGAAAGAGTGTGTAAGATAATCAGATGGAACTCGATGATGTTTA
AGGTCCTTCCCAACCCAAACTATACTATGACTTTAGAAGATGTGTGCATG
TGTATTTCAACACGACATTATTTGCAATATTATTATCATCATATTTTATT
TATTTTTTATTATAGTCATTTACTTCTACTACTATTTCTTTTTTTCCTAC
TTCTATTTCTCCTTCTTCATTTCTTTCTTCAGGTACTTTTCGTTCTTCTT
AATTTCATTCCTACTCTTATTCCTATTCTTATTCCTATTCTTATCCATAT
TCTTATATCTATTCTTTACTTGTGTTTTTTTCTATTCCTAGTTACTATCT
TATTTTCTATTTACACCTATTGTTTCTTACTCTTCTTCATTTTCTTCATA
GTATTCCTATTCTAATTCTACTTTTTTTGGGTTTTTTTTTTTTTTTGTGG
GTTTTTTTTTTTTTTTTTTTTTTTGTGATTTTTTGGTGTTTTTTTTTTTT
TTTCTGTTGACAACTACGAGTATATTTAAAGGCAACTTTCCTTTGTCTAG
GTAGAGTGTCTTGTGTCGCTGTCCTGCAGTGTGCAGTGGGGTCCTGATGA
CAAAATGGCCTTGGATTCCNACATGGCAGCTTCTGATGAAAGAGTCGAAG
CAGTTTTTCCCTGGAAGAGCGGCCAGCCATGGGTCGAAGTGGCTCCAGGA
GGTGGCAGAGTCACTGTGGGAGTGCTCGAGTGGTCTGGATGTGGCACTTG
TGGACCCGGTGTCAGGTGATGGTGGCGGTGCCAGGCTGACGCTGGGACTG
GAAGATTTTCCGGGTCTCTCGTCCCCTCGGTGCTGATCTGCAATCCCCGC
TGGGCAGGCGGCACCGAGTGTCCCCGGGCGCTGTGTGGGGCTGGCAGGAG
CAAGGGGCCGGTGCAGCAGGCGGGCCCTGCTGAGGCTGCAGGGCCAGCGC
AGGCCAAGGCAGCCGGTGCGGCTCCCTCAGGCCTGGGGCAGCTGGGGCCG
GCCGCCATGGCAGAGCCCGGGCTGGCTGGGCCATGGCCCTACGGCTCGGG
CTGTGCAGCCAGGCAGGGGCAGCGCCACAGGCGGCGCAGGGCCCGCAGCG
CCCGCCGCAGCCGCGAGGGACGTTCACATGGGCCCGGCTCGACCCAGGCC
TCGCGAGGGGTTGGTGAGGGGAACGCGCCTCCTGACAAACCTCCCCATCT
CCGCACTCGCTCTTCCTCATCCTCGCACAGCTCGAGGAGGCTGACTCCGT
CCCACTCATCCTCCTCTCGCGGCGAGCGCTGGGCCCCGATGCTCTGTTCC
CAGATGTCCTGCCCGGGGTCTTGGTTGCTGTCGCTTTCCCAGCTGGATTG
CACTGATGGTCTCTTGTCACTCCCACAGGACACCTCCTGGTCAATGGAGT
CATACTCCTCTGGGAGCTCTTGGTCTATGGTCTCTTCCCAGTCCGATGGC
TCTTGGTAGGTGCTGACACCTCTGTGGAAGAGCTCATGTTCGCTGTATTC
TTCCCAGTCAGACAAACTGNGGGAGCCACCGACTTCTCCTTGGCTAAGGC
CTTGCTCTGAGCCTTCTTCCCGGTCTGACCCTTCTTGGTTGCTGCCGACA
TGACCGTGGGACAGCTCTTCCTGCTTGCATCCATCCCAATCGGACGGCTT
GTGGTAGCAACCGGCTTCTTCTGGGGACAGCTCCTGTCCAATGCAGGCCT
CCCCTTGTGTCTCTTCCTGGTAGCTGCTGGTTTCTGCTGGGAAGAGTTCC
TGCTCAATGCAGGATTCCTCTTGTGTCTCGTCCTGGTAGCTGCTGGTTTC
TTCGGGGAAGAGCTCCTGCTCAATGCAGGATTCCCCTTGTGTCTCNTCCT
GGTAGCTGCTGGTTTCTGCTGGGAAGAGCTCCTGTCCAATGCAGGCTTCC
CTTTGGGTGTCTTCTTGGTAGCAGTAAGTTTTTTCTGGGTNCAGCTGCTG
CTCAGTACAAGCTTCCCCTTGGAATCCTTCGTCGTCATTGCTGGTTTCTT
CTTCGGACACCTCTTGGTATGTCTCAGCCTCTTCATACATTATATAGATC
TCCTGGTACATCACACATATTACCCATTGGTCCATCTCCAGCTCTTGCTC
TGTTCCATCTCCCCACTGGGCTCTCACATTTACCTCCTGGTAATGGGCCT
CTTGGTGTCTCACCGCTTCATATGGGGAAACTTCCTGGATTGTCACTTCT
TCTTGTTGGTAAGACTCTCTGACCTTCATCTCTTCTCCAAGGCAAAGCTC
TTGGCCTGTAATGTCTCTCCACTGGGGAAGCTCTCGATGCATGATGTATT
TCCAGTCTTCTTCCATTCTGGCAAAGGCCCCCTCCTCCTCAGTGGCCGAC
AGAGGCAGGCCTGAGCTGTCACCTGCCCCCAGCCTCTGCCTGCCGAGGGC
CTGTTCTTCCAGCCAGGCGGGCAAGGGGCTGGCTGCCTGGGAGTTGGGCT
TCGCCTTGTCCTCCTCCATCTGCCACGTCGTCTGGCGCGCAGGGATCCCG
GAGCTGCTTCCTCGCGAGCGATCGGCGCTCCTGGGACTGGGCAGCGCAGG
GCCCTGTGCCCCTTNTATACCCTGCAGGGCGTGGCTGTTCCATGTCACCA
GGGCCACTGGCAGCNCCATGTCCCGCATCACCCAGGGGATGACAGAACGC
TGCCGTGTCACAAAGGGCCACGCCCGGCACCCCCTCAGCAGCCGAACCGC
CTGGACGTGGCGCGGAGCAGCACCCGGACTCGNGGGCTTNCAGCCC
>oenMel6-38692#Unknown
TATCACCCTAAAGCACAACGGAAAGCATACCCAAGCAGAACAGAAAACTC
GGAACTTAAGGCA
>oenMel6-9840#Unknown
CCTCAACAAATAGATGTANATGCGTGAGATGTGTGCATATGTATGTGTAT
ATATATACACACTATATATATATATACACACACACACACACATATGATTA
TATGCTACTTGAT
>oenMel6-2380#Unknown
TGCCNGTGTGGGTCAAAGCCTTTCCTTCTGAAAGGGGCACTAACACAGCT
CCTCTNCTCTGGCAGCCGCCTATTTTCATGAAACTCGTAGGAACTTAATA
TCTTTGAGACCTCTGTCANATTTGGCTGAAATCGGCCAACGAGTNCAAAA
GTTATTGGGGGGAGGAGGGGGAGAAAGGCTGACAGACAGCANGATCGCAT
AAGCCTCGTTTCCTTAGGAAACCAGGCTAAAAGA
>oenMel6-4615#LINE/CR1
GGAAAGCTGGACTGTAGGTGTTCAACCAAGGAGAGTTGCATAGAAGTGTG
TGACATGGTTCCCCTCAGCATCCTACTCTCTAAATTGGGGAGAGATGGAT
TTGGTGGGTGGGCTGTTCAGATGGATAAGGAATTGGCTGGATAGCTGCAT
TCAGAGGGTCAGTGTCNCCATGTCCAGGCGAAGATCAGTNACAATTGGTG
TCCCTCAAGGGTCCGTATTAGGANCAATGCTGCTTAATATCTTCATCAAT
GGCATAAAACAGTGGGATTGAGTGCATNCTCAGACAAGTTTGCAGATGAC
ACCAAGCTGTGTGATGCAGTTGNTGCGCCTGAAGGAGCAGGATGCCATCC
AGAGGGAGCTGANAAGAATNGGGCTGCCATGGGAATCTCATGAGGTTTAA
CAAGGNCAAGTGCAAGGTGCTGCACCTGGGTCAGGGCAACCCCGAGTATC
AACCCAGGCGGGGATGAACAGATCCGGAGCAGCTCTGACAGAAGGACCTG
GGGGTGCTGGTGGACATGACCCAGCCGTGTGCGTTGACAGCCCAGAAAAC
CAANCNTGTCCTGGGCTGCATCCAAAGCAGCGTGGCCAGCAGGGGAGGGA
GGNGATTCTGCCCCCCCGCTCTGCTCNGGTGAGACCCCACCTGGAGCGCT
GCATCCAGCTCTGGGGCCCCAGCACGAGGACGTGGANCTGCTGGAGCGAG
TCCAGAGGAGCNCCTCTCCTNTGGAGGCAGGCTGGGAGAGTTGGGNNTGT
TCAGCCTGGAGAGGAGGCTCCGGGGAGACCTNATTGTGACCTTCCAGTGC
CTAAAGGGGGCCTGCAAGAAGGTGGGGAGGGACTTTTTACAAGGGCCTGN
AGTGACAGGACAAGGGGNAATGGTTTCAAACTGANAGAGGCAGATTTAGA
TNAGATATTAGGAAGAAATTCTTCNCTGTGAGGGTGGTGAGGCNCTGGNA
CAGGTTGCCCAGAGAAGCTGTGGATGTCCCTGGATGTCCAAGGCTGGATG
GGGCTTTGAGCAACCTGGTCTAGTGGAAGGTGCCCCCATGGCGGGGGTGG
AACTGGATGATCTTTAAGGTCCCTTTCAACCCAAACCATTCCATGATTCT
ATATTCTGTTTCCATGGAA
>oenMel6-3187#Unknown
CAATGGGCTGGGACACCCAGCTGCAGAGCTCAGGGGACAAGGTTCTGATG
CAGGGCACAGGG
>oenMel6-3436#LINE/CR1
TCCTACAAGGATGAGAGCCTTTCCCCAGAATATGTCAAATTTGAAACAGA
GCCATGCTTTGGGGAAGACTCTGATCTCCCAGACATGTCCTCATGGGAAG
CATATGACAGCAAACTGCTCTCCCTGTGGGAAGAATGTGAGCAGAAGGAG
CTGAAGAGGAGGGCCCTGCTCAGTGATGTGGACAGAGAGTCAAGCTTGTC
ACTTGAACTGCCAGACTTGCAGGAAATGTCGAGGCATCAGAAGGTGCTGG
AATGGCTGGAACCCAATGTCCTCAATGATTATGGCTCTGAAGAGGCGGAA
GAGACTGAAGCTTGCGTATTCCAGAGGCTGTCCAAAGTGAAAAGGCGCAA
GGAGAAGCTGGAGCCCCGACAGAAAGAGCTCTTGGGCACAGAGGTGGCAG
CAGAGGCAGCCCCTGCCCTGCCCAGTGCCTCTCGTGCCCTATGGAGTCCC
ACAGACTCCGAGCTGGCAGCTGTGCCCCCAAGCAGAGCTACCGAGGAGGT
GGAGGAGCCTCCCCAGGCTCTGGCTGTGCAGGACAAAAAGGCAGCAGCTC
CTTCTGTCCCCAGTGAGGGCTGCACATCACTGGGGACACGGAGCACCAGG
AAGCCCCTGAGCAACGCTGAGCCGCAGATGCAGGCACTGAGGAAGCAGCA
GCAGCAGGAGGAGCAGGATGCCCTGGAACACCGGATTGCTGCAGAAAGGG
AAGCAGCAGTTCCAGCAGGAAGGGAAGGGAGCTCAGTGCACAGCTCCCCC
AGGCCCTGGCCTGCCGAGCTGGGAGCCCAGGCCCTGCGCGGGCAGCCGGC
CGCCCCCAGGAAACGCCCCTCCCGCTTCAGGCGGGCGCTGCAGGCGCTGC
AGGGGCTGTTCCGCTGGCCCTGCCTGAGGCCACGGCCCGAGGAGTGAATC
AGGGCACCCACAGCAGGGATTGCTCCAGAGCCTCCCTCCCTGCAGGGCTG
GGCACACCCGGAGCTGCCAACACCCGTGGGAGCCGGGCCACAAACTGTGA
CAGGAAGACGAACACAAAGACGACAAAGACAACGAAGAAGAGGAAGACAA
TGAAGACAAAGAAGACGAAGAAGACTAATATGTCAAAGACAAGAAGACCA
GATGATGAAGATGAAGACGATAAAACGAAGAAGACAATGGCATAGACAAA
GACGGCAAAGAGAAATAAGGCAAAAAAATGAAGAAGACGTAGAAGAGGAA
GAATACTTATAAAATGCATAGAATAGTAATAAGAAAAATAATTTTTAAAA
TAGGAGTAGAAGAAGAGGATAAGAATAAGAGTAATAATTTTAGGATATAG
GAATAGAAGAGTAATATGAATAAGAATTCGAAGTTAAAAATGCATAAAGA
AGAAGATTAAAAAGAATAAGAATTTGAATTTTAGAATATGTAGAAGAAAA
GAAAAAGAAGAGTAGTAAGAAGAAGGAGTATAGAAGTAGAGTAGTAAGAA
GAAGGAGTATAGAAGTAGAGTAGTTAAGAATCCATAAATGAAGAAGAGGA
TAAATAAATAAATAAATAAATAAAAATACCAAAGAATTTGTCTTTATTGG
AAGGGACTTGTAAAGGTTGTCTAATACATCCCCCCTGCCACAGGCTTCCA
CTAGTCAGGTTGCTCAGAGCCCCATCCAACCCAAATTATTCTAGGATTCT
AGGATTCTATGATTAGAGGCCAGACCTGCACAGAAGTGAGTACACCAAGC
TGCTACACAACAGGCAGGAGATACTCTGTTTCTTATTTNGCAATCATAAG
CCCTTCGTGATCACATCACTGTATTTTGTTGGCTTTTTTATTCCCTTCTG
CACATCAAGGCTACAGTTTTGGCAAACCATCATTGAGGATTCCAGCATCT
TTTTCCTGAGCTGGAATAGCTAGTTTAAGTTCAGCCTCCTCTGTTTTACA
TCATATTTCTCTATCCAGGTCACCCTCTTTATCTACACTGAAAGGATTCA
CCTTCTGTTTTTCCTTTTGTGAGTAACACTGAGAGCTGCACATAGCAAAG
TTCCAGAGTACATCAAATATCCTTTCAGCAGTCTTCTGCAGTGATGGAGC
ATCATCTGACTGTTCTGTCAAAAGCTAAACATGTGCAACTCTAACAGCAG
TTTTGGTGCCTAGTCCTGGGGTACAGTTCTTCATTATACTCTTCTGTCCC
CTGTCACAATGACTTCAAGTCAAGCTGCTGGCTGGACACAATTCAATCAA
GATCTAGCTGGAGATAGTTAAAACAGAGAGTTTTCCAGTCAGTGTCACTT
TTTTACTCCTTGTACTAGGATCAAACAGAGATAGGGGAGCAGACTGTGCC
AGCTCTGTGCTCTTCAGAGTCTTTTGCACATGGCCAGGAGGATCCCAGCT
ATGGATTTATGGAAAGCAATACAGCAAAATGTGGATCCTTTTGAATTTTA
AGCCAGTGCTTGCAGCCCCTCCAACTCAGGAACATCTGAGAACTCAATAA
GGACATTCTCCACTACAACACAAGTTATCGATGACAGAAGAGTAAAAAAT
AATGGTAAAAAAAGAACTGGAATCTGACATGGAGGGAAAACAGACTCATC
TGAAAGGATTCATTCTTGGCAATGGCCATGACTATTACTCATTTCTTTCT
TTGATTAAAAGTTTGTTGCTGTTTACTTGAAGCCAACTGGTTTGTAGCTC
CTTGGTTTCCTCCTTTTACCCTGCTAATGATAAGAGACATGGTGCTCTCG
TTTCTGTGACCCCATCCCCCTCCCTCTTTTCCCAGAGATACTGGATGTTT
GGAGGTGGCTTACATCAGTTTTTGAGGTAAAGGGGATTTGTTTTTTAGCA
AACAGCCTGAAAATAAGGAATGATTGAAATATACTTGAATTGAAACTTTT
TAGAATCCTCCCACCTCCTCCACTGGCTGTTTTGTAAGTGGAAACAGGAA
AAGTAGTAGAAGACAGAAAAGGAGCATTGATTAGATTTTCACTACAAAGA
TGGAAATTGAATAAAAATGCAAAATCTTTCTTCCTCTTGGTTGCCATGTC
TTCCTACCACACAGCAACCACCTGGGAGATCTGATTATCTGATTTTGCTT
GGAGCTGAGATGATAAGGAATGCTCGGCTGGTGACGTCAGTGCTTCCTCT
CTCCCTGTGTTGTTTTTGTGTATTTTTCAGCAGCAGGAGATACCATCTGG
GGAGGGCACAGCTTTGCTTGTGTTCCTCCAGCTCCCACACAAGCAGTAAT
AGCAGATCCAGAGGCTACATTCCTGCCTGTTGCCTTCGGCATCTGTCTGT
GGACTTCCTGCTGCTCATAAATTTGCTCTGCCTTTTATAATCCTGCTGAC
CCTATTTGTTTCCACAACCTCCTGTGGCAGTGAGTTCCAGAAGGTCATTC
TCCCACCTGCTCCAAATAAAGTCCTTTTTATCCATTTGAAATCAATCTAC
CAGACTGATCAATGGCCTTAAACTCGCATCACGCACCACGTCCACTTTCT
CTTTATGATTTTGTAGGGCTGACATGTTTTGCTCCGCCTTCTCCAGAGAA
AAATCCCAGCCTCCCCAGAACCCCTTCATATTGCAGCTACCCCATCCCCT
TGATCTCAGTTGCCCTGCTCAGGACTCCAAATCCACTGTATTCTTACATC
CTAAGATGTCCTGTTGTGATAGGACAAGGGATGATGGTTTCAAACTAAGA
GGTTTGATTTAGATTAGATATCAGGAAGGATTTTTTCGCAATGGAGCTGA
TAAAACATTGGCATGGGTTACTCAGAGAGGTTGGCATCCCCCATGCTGGG
AATTTTCAAGACTTTCAAGGCTTAACAAACTTTTTTAGAAAATACACAAA
TTCTTCAGTAATTTGTTTACTTCAATCTTTATTTGGTCAATTCCTGGGAA
ATTGGACGCACACGAGTGGCAAGACTGTAAGAGACCTCCCACTTTCTCCT
CAGGAAAGGCTCTGGGTCATGCAGGAACTGCCACCATTTCCTCTCCTCAC
CCGAGTCCTGCCCCTTGCTCTCCTGTACTGGCGGCACTGACCCTGCCGCT
GTCACCTCCTGGTGCTGCCTGCCAGCCTGGGGTCCCGGCCAGCTGGGCCA
GGGGCTGGGTGGCCGGGAGTTGGGGTTCGCCTTGTCCTCATTCAGCACTG
CTGTGCTCGGCTGCAGAGGGATCCAGGGACCCCCTTCCTCCTGAGGGAGC
AGCACCCAGAAGAGTGATATCGGGGCTGCTTGTGTGCAATGGGACATGAC
ACAAACAGGGTTCAGTCTCTTTGGGAGAAATAAATGAATTTTTAGTCAAC
GTGGGAGAGAGAACTCGTTTCGATGGCGCTTGTCTGTAGAACCTGGCGAC
GCTGCCGCAGCCGAGCGCAGCCCTTGGGGCCGCTGTCTGAGTGCATTTGG
AAGGGCACGGACACCATTTCAGCGCTGTCTGTCTCTGTGCTCCGTGTTTG
TGCTGCCGTGCGGGCGGAGCGGGGCTGGCGGGAGCCGCGCTCCCCTCAGA
GCCCCTGAGGGCGGCAGCAATGGCGGCGCCGCTCCCTCAGCGCCCGGGCC
CGGCCCCGGCGGGCGGGGTGCCCTCGGCAGCGCCCTGCTGGCAGCAGGGA
CCGAGCCCCGGCCCCGGGCCCTGTCCCCGTGGCTCCGCAGAGCCCAGGGG
ACACCTGCGAGAGTGGCTGCGATGCTCGGCCATTGGCCCGAGCCGGTGCA
GCAGCCGCCCCTGGGCTCGGGGAAGCGCAGGAGGCTCTCGCCGTGCCCCT
TGTGCAGCTCGGCCGGGTGCCCGTGCACGGCCCCGGCCTCGCCTGGTGCC
CCTGCCCCGCTCAGCTTCCCGTGCCCCGCAAAGGCGCCCAGGCTGCGCTC
GCTGCCCCCGGCTGGCACTGCTGAAGGCAGGGACGAGCCCCGGGCCCGGG
CAGAGCCCTGAGGGACACCCCTGCTCCCCGGCCTCCCGCCGCACGCGGAG
CCGCTGCCCACAAGGCCCCGGCACGTCCCTGGGGCCACTTCCTCGTGCCC
TGGCCAGCGCAGCCTGCAAACCCAGGGCTCTGCAGCCTGGGGCTGGGGCT
GCCGTGTGCCAGCGTGGCCAAAGCCTCTCAGGGCTCTGGGCACAGCAGGG
GCCACAAGGCCACAAGTCCGGGGGCTGCTTCGTGCCAGTTCCTGCCTGCT
CCACCGCTCATGGGGCGCCGGGGGTGGCCCTTTGTGACCCGTGTCATGGC
CCTTTGTGATGTGGCACATGGTGGTGGCCAGAGACCCTTGTGACATCAAA
GGGCCCCACCCTGGCCTGGGGGTATTTAAGGGGCGCAGAGCCCTGGAGTG
CTCAGTCCAAGGAGAGTCTCTCTCTGAGGAGGAAGCAGCTCCCTGGACAC
GTCTGAAGTTGAGGACGCTGGAATTTGGAAGAAGATGGAGAAGAACCCCC
GCTCCCAGGCCAACCAAGGCCCGCTGCTGAGCCTGCGCAGGAGGCAAAGT
GTGACTGATGAGGCAGGGAGGAGCGGCCAGCAGATGGAGAGGGCCAGGAT
CTTCGCTCTGCCAAGGGAGCCCTCTCCATCCCACGCCTCCTCCTCATCCT
GCTCCTCACAGGCACCCCTCAAGCTGCCACCAGTGCACCTCGGGCAGCCA
AAGGCGGGACCCAAAAATCTCCAACTACGCACGGTCCCAGAGGTGCAGCC
CCGGCAGCCGCAGGCAGCGCCGCAGGGCAGCCGCAGCCAGGCCCTGTCCC
TCTGTGGGGACAGACTGCCACCGCTGTCACCACTGCCACCTGTGCCACGG
CCGCCATCACTGCCCCGCCTGCTGAGCCCCAGGGACAACGAGAGCCGGGG
CACAGAGCTGGGCAGTGCAGGGGAGAAGGGGCCGCAGCCCTGCAGCCCCT
GTTCTCCGCAGCCATACACCCCCCTGCCCAGGGTGATCCTGCCCCGGCTC
TGGGTCGGTCGGGAGGACGCATTCTATATATCCCCGAGCCAACAGACTCT
GCCTGTGCCACCCATCCACACGGGGGCTGCAGCCATGGAGCACAGCCTCA
GGGGCACAGCACCAGAGAAACAGAATAAGGACAGCAAACATACCAAAACG
GAAAACAGCAGTTACAAGAGTCTCTTCCAAGTGTTAGAAGAGTTCGAGCC
CTTACA
>oenMel6-1401#LINE/CR1
GGCTATCTGCACAGCTCAGNGGTTGCTGGCATCCTGCCTGACCCTCTAGG
CAGAATGGCGGGACTCCTCCGGGAGCAAAGNCTGCGGCTCCGGCTGGGGT
GTCTGCGCCATCCACCCCGGCAGCGGCGGTGCCTCCGCTCACCTGGGGCT
GCTGCAGGNAGACAGACTGCAGGNAGGGCACACACCTTTCTCCTGGGCAG
GACAGCCAGCAGGCCCGCCTGCAGAAGGTGCNGCCCAGGTGGAGGGCCTC
CTGCAGCNTGCGGNTGAGCTGNAGGAGNCGGNGAGAAGNCTGTGTGGCAT
CNGGGAGCCTGCTGAGGAGGAGNCNGAGTGCAGCTGGTTCCAAACTGCAC
TGAACCCGCAGTGGAGCCACAGCNAAACAGCCAGAAACTCCCACCAGTGG
CACNCANGGAAGGGAGNGGGGCCAGTAATGCAGAAGTAATGGAGGCTTGA
CAATGGCAAGGACCTGCAGGAGGNAGACCCTCCCCCGAAAGNCTGAGGTG
CCNCCGCAGAACCGCTTCGCTGCTCTGCAGANTGAAGGGGANNACCCGTG
GCATCAGAAGAGACATCCTGGCTGAGAAAGGGATCTCTCAAGGTAGCTCT
CCACATAACTGACTGCCAGCACAAATAAGTAAAAACANTAGAGTGGTAGT
AAGCAGGCGGCTCTCTTCTGAGGTGCAGANACCAGGCACTGACTTGCTGN
CCTGATGCGCGTTCTAGGGGTGTGCTGCTCACCAGNGACATAGTNTCAGG
GATNTCACCGGGANANCGCCAAGCCTCNCACAGCCCACTGATTACCTGCT
GATGTTCTTTCNTGTGGGCGCCAGAGACAGAACCGGCAGCAGCATGAGGA
GCAGGAAGGATTACAGAGCCCTGGGAGTGGCGGTAAGGACTCTGGAGCGC
GGGTAGTTTTTTCATCAATCCTCCCGGTCAAAGGGAAGGGTTTGAAAGGG
CCAGTCGAATCTGGCAAATCAACAAATGGTTAGGTTGCCACAGCCAGGGG
TTCGGCTAGCCATTGGACCATGGGACTGCTTTGAGAAACCTGGCTGCAGG
GGGCTGATGGGGTCCATCTGTCAGAGAAGGGGAAGAGCATCTTCGGTCAT
AGGCTTGCCAAGCTGGTGAAGAGGGCTTTAAACTAAAGTTGCCGGGGGAG
GGGAACCTCAATCCATCCCACTCCTACCAGTTTGATGCCAGNGCCAGCAA
NAGATGCCCAGAGCCTGGAGAGGGATCGCAGGTCAGCAGGAGAGCACCTG
AAGAGCAGCACAAAGGAATTCCAGCCACTCCAGCCAGTAAGTCGGCTTCA
TCAGTGCNCCAGCTTAAATGG
>oenMel6-21026#LTR/ERVK
TTGAGAGACAGGGACTACTGACTCGTGATCAGAATCCAAATTTACTGTGA
GCTACATNTGCTTATACACCATTTTTAGGAAGGCTAGTAATTTTTTACTA
CATTCATTGGGTTAAACATCACACAGACAAACTTTACATTTCTACTTATT
TAGTTCAATCTTCTTTCCTGTCGCCAGTCTTGATCCAATCTTCTTGTAAT
CTTCAAAGCTCTGTTTGCTCTTGCCAAGGCGTCCTGGTTATCAAACTGCA
NATGCCAATTAAATCC
>oenMel6-8555#LTR/Gypsy
GGATGGTGGCACCGGGGACACGGGGACAGTGGTGACGGCGGCAGTGGGGA
CACTGGGGACGGCGGTGGCGGTGGGGGTGACANTGGTGGCACTGGTGACA
CCGGTGACGGTGGCACCGGTGGCACTGGCGACACCGGTGACGGTGGCAGC
GGTGACACCGATGGCGGCGGGTGACGACGGCGGTGACAGTGAGCAGGTGG
CACCGGATGGTGGCAGCGATGGTGGCAGTGGTGACAGGGCAGAGGATGGT
GGCACCGGTGGCACTGGGTGGCGACAGCGGTGACAGTGGCACTGGTGGCA
CTGGTGGCAGAGGCGGTGGTGACACCGGTGNCGCTGTCCCCGATGGCACT
GCCGGCGCCGGTGACAGCGGCGCGGGGTGACACCGGTGGCAGCAGGGGTG
ACACTGGTGGCACCGAGGTGGCGGCGGCAGGGGGGTGACANCGGTGACAG
TGGCAGGGTGGCNCCGGCGTCCTGGCCCCAGCGGCGCTGGTGACACCGCT
GGCACGGTGGCAGCGGNGAGGGCTGACGGCGGGACGGGGACANTGGTGAC
ACCGGGTGGTGACACCGGTGGCCGCCGGCCCT
>oenMel6-15475#DNA/PIF-Harbinger
TTACCTGAGGNTGTGTNTCNGCAGGTGCAGGGGAAGAGTCATCTGACCAA
ATGTAGATGTCTNCGTCTGAGCTAGTCGTCTAGGCTCCCTTTATAGTCAA
TGGAGAGAAATAGGCACTTCTAGGGCGCGATTCATCTCATCCTAANGTAG
ACGTCTAAAATAGGTCAGATGAATCGCGCCCCGGAAGTGCCTATTTCTCT
CCATTGACTATGAAGGGTGACTAGCTCAGATGTAGATATCTAAAGCAGAG
TGAGACGAATCCCACTAAGCATCATCTTTGAAATGGCAGCTCAGGAAAAT
ATGCAGGNGTGATGTCCTCCCAGCTTCAAGCACCGTAAGTCCAAAGAGCC
TCNTCCACCTCCTCANACGNCTTTTCCCTACGCCTGCCA
>oenMel6-2480#LTR/ERVL
TGTGATAAATATATATTTTTCTTGGACTATAACATGGTGATGTAAAAAGC
TTTTGTTCATGTAACTAACTCAGAGAATGGTAAAAAGATAATCAGGAAAT
TCTTCACATTCTTGGATTATCCTATCTGGATGAAGATAGGGTGACGGACA
CCAGAACCCCAGGGAAGGAATTTATTGATCTCCTTATCAGGGAGTACGCG
ACAGGATGGAGCCACAAGGAGAAAAAAAAAATGTTGATTTACAGGTTGGG
GGGGGGGCAGGTTGGGGGAAACTCAAAGGAATGNTTTTGAATAATACATG
AGAGTCTATGAATATGCAACGGGTTGATGTATTTAAGGAGTTTCCCGAGT
AGCAGGCGTGCTCTTGGCTGAATGCCAAGCACCCGGCCGTACTAACCCTT
TGCTTNATTGCTTTGTCTCCTATTGTCTTTTTATTAAACCTTTTTAAATT
TACCAGGAAAGTGAACCTCGTTTTTC
>oenMel6-8669#Unknown
GAAAAAGGAAAAANGNAAAAAAAAAAAAAAAAAAAAAAAAAAAAAAAAAA
AAAAAAAAAAAAAAAAAAAAAAAGAAAAAGCCCCGCAAGCTAAACGCCGT
CCGCAGGGGGCCGCCGGGGGCCCGGCGTGCCGCGCCGCGCCGCGCGGGCG
CGCCGCGCGGGCCCGCGCGGCGCGGGCGGAGCGCGGCCCCGGCGCGGGCG
GCCGCCGCCCCCTTGGGCCGCGCCGCGCGCTGCCCCGCGCGGGGCCGCGG
CCGGCTCGGTCCGGCGCGGCNCGGNCCGGCCGCCGAGCCCGCGCCCGGGC
CCGGCGGGCCGGGCCGGNCCGGGCTCGCCTGCGGCGGAGCGGTGCGCGGC
NCCGCGGGGCTCAGGAGGCGCCGCCTCGCCCCCGCGNCGCTCCCGCCGAN
TTTCGCCGCCGGA
>oenMel6-2637#LINE/CR1
ATCTTTGCCAGCAGGCTGGCCGACCTGNTGAGGAGGGCTTTAAACTAGGA
ATGACGTGGAGGGAGAGAGTTGCCAGCAGCCCGGTGAGGAAATGATGGAA
AGGACTGGGGTGATGTGACAGAAAAGGANCACAAAATCAGCAAAACAGGG
CTGAAGCGAGGCCACCTCNAGCGATTGCACGNAAGCAAGGAAGTGCCTAN
AGGGCANCATTACGGGGAAANTCCCANACTCTTTCTGGGAAATCAGCACT
CTGGGTGCCTCTCTGAAGTGCCTGTACACTAGTGCACGCAGCGTGGGGAA
CAAACAGGAGNAATAGAGATCCGTGTGCGGCTGCAGGNTCTCGGTATCAT
GGAGACGTGGTGGGACGGCTCGCATGACTGGCGNTGGTGGANGGATGCGT
ACTTTCTGGAGGGCCGGGANGACGAGGACAGGGAGATTTCCCTTTNTGTG
AGAGAGCAGCCGGAATGCGTGGAGCTCTNCCCGGGGATGAGCCGAACAAA
GTGAAAGTTTACGGGTANGGACTNAGAGACAGACTAGTATGGGTGACGTT
GCTGTGGGTGTTTGCTGTGGGCAG
>oenMel6-25091#LTR/ERV1
GATAAATAACGTACAGAATAAAAATTTTCAGCTCCCCTGAAGTTGCTTAA
AGACTAACTGGCAAAAAAGATAAAAGAACGTAAAGGTAGGCACACAGGAT
GATAAACGTAGCTGGAGCCAGTGGAGAAACAGATAANGAGGNCTACAGTG
GTTTTGGGAAAGTTCTGTAACAAGAAGCAACAGCACATGNCCAAAGGAAA
AGTTCAAGGCAGGGTCACCTNTAATATTGCGGCACTCAGTGAATACGACC
ACCAGAGACCCCTCTGGATGATCCTCCAGGACCATAAAAGGACTTCCAGN
AGGAGGCAGACGCATGNAAATTAGTTCTAGGAAAATGATGTTTATGTGTT
AGNTAGGAAGTGTTTTAATGANTATGTGTGGATCATGATGGATAAANNCC
CTGTTGTAAAGTCTCACCACACACACAGATTAGAGGAGAGATCCTTCTGT
GTCCGCCGTGCATGTAAAGAATGCCTGCTTTCTAATGCTTCAAATTGTGT
TAGAAAGTTTAT
>oenMel6-2067#Unknown
CTCCCGCTAACTCCCNGTGCTCCCAGCAACCCGGAGGGCNCCGGGGACGG
CGACCTGGNGNTNCTNCGGNTGCANNTGNNGNCNCACCTGNGCCGTCCCA
GGTGAGCCCGCTGCCGCTGGCGCGCACCTGTCTCCCCCGGGCGCTGCCGG
CCCGCCGGCGACGGAAGGTCTCCGGCTGCTGCTGGGGTGAGGCCGCACCG
GCGCCAGGAGCTGCGGCTNCAGNGCACAGGTGAGGCACGCCTGGGGCACC
CCTGGGCAGGTGAGGGGGCACTGGGACAGGTGAGGCGCACCTGGGACACA
CCTGGGNCAGGTGAGGGACACTGGGACGGGTGAGACACACCGGGGACAGG
CGNGGACGCATCCTGAGGGAGCGCAGGCGACCCTGCGCGACACGTGTTCC
CCCTCCCCTCGCAGGTGACTCCGTGGGCGNCGCGGGCGCCTCACCTGTCC
CAGGTGTGTCTCACCTGTCCCTCACCTGTCCCAGGTGGCNCTCTGGACGC
TGCGGTCGCTGCCGGGTGCCCGCCAGGTGTCGCTGTCGGAGCCGCAGCCG
CGCCAAGGCGAGGAACACCTGGGGGGGGGGGGACGTGAGGGACACACCTG
GGACAGGTGAGGGACACACCTGGGGACACACCTGGGGCAGGTGAGGGACA
CACCTGGGGGGTGGGGGACACCTGGGTCAGGTGGACACACCTGGGACAGG
TNAGACACACCTGGGACAGNTGGGGCACACCTGGGACACACCTGGGACAN
CTGGGACACACCTGGGCCAGGCGAGGAACACCTGGGGACACCTGGGGACA
CCTGGGACACACCTGGGACAGGTGGGGGACACCGGGGACACACCTGGGGN
CACCCGGGGACACCGGGGACACACCTGGGGACACCTGGGCACACCTGGGG
AGTCAGGGGGGCACACCTGGGGACANCTGGGGGCANTGGGGACACCTGGG
GACACCCTGGGACACACCTGGGGACACACCTGGGAGA
>oenMel6-9442#DNA
AAAGGGTAAGAAATATCAATGGTTCAAGGCCTTAAGAATCTCTGCTTCAT
TTTGTTCAAAATGGTGTCTATATCCTGGTGTTTAGAAAGAACTGAGAAAC
TCAAATAAAATCCCATTCTTAGCTGTTTCAGAAGGTCATATGGATCTAAA
AGTCAAGATGCTGACCTGTTTTGGAGATCACAATTGTATCTTATGTGTGC
TGCCAGTGGAGATTTGAACTCCTCAGGTGTAGTTGGTAATGGTTTCTTCC
TCATTTTCTGGTGCCTGGATTCAGGAGCTGGGGTCTGATTTGTGATGGTG
TGTGGTGGATCAGAGCAGTTGATGAGTAAAGAGAGATTGTGCTCTCAGCA
TGCAAAATGTTACATGAGGAGAGAAAGTCCTGGGTGAAAAAGTTATTCAG
TTCAACTTTAAGCACCAAATACATCCCTGTACCCTCAAGAGCTGGCGCAG
AATTGTTCTCTGGAGAAGACTCTGTCCTTCCATGGGTTATTGATGGATGA
GGATGCACCGGCTTGTTAGCTCTGCTGCAGGGAGCTGGGTGAGTGGCACC
TTCTTGCTTACAGTGTGGATGTGCCACAGGAATGATTCAGCTCTTGTTAC
AGGGACCACCAGATTACCCACAGGGCTGATCATATCTCTCTGCTTGAAAC
AGGGTTTAAAGACTGTGTGCCAGATAAGAGTGGGGTCACAGGCACTGGGA
TGCACCCGCAGTGCAGGGGGCTCTACCTGAACTAGTCAAAGTCTCTTTAT
AGTCAAGGGAGAGAAGTAATTCTCCTTAGGGGGTGATTCATTTCACTCTA
AAACACACATTTAAAATGGGTCACCTCTTAAAACGCCTCTTTCTTCCCCC
TGTTTGGAGGGGAAGCCTGGAGCAGCTAGCTGAGATATAAACATTTTTAT
GTGTGGGATCTTTGCAAGGAGGTGAGGTGAATCCCATGGTTGGTAATCAA
CAGTGGGAAAGCACATATAGGATCATTATGTACAAAATGAGGCCCATTCA
ACCTGAGTGTTGAATGAGGCAGGACACCCATGGAGTGAACAACATGTCTT
CATGTAATTAAAAGTGCCTTCATAATTGACAGAGACAATCAGAGAAAAGG
CAAGTATCACTAGCAATCTTATTTCTGATGTTTACCAGTGCTTGAGTGCT
TGACCTTATAAATTCCATAAGCAGCATCCATGAACACATATATATGTATG
TAAATAATGCAAATATATAAAATTTTTGTTTAGATTTTTCTCTGCATTTA
TAAAACCAGATCCTTCACTAATGTGAATAAGGGTAATTCTGTTTTCTTCT
GTACATTTATGACAATTTCTTCTAACTGAAGGTCCAGCCTGGTTTGTGCT
ATATGTCTTCTTATTTTAAGTTCCACAGACACATAAAGTGAATCAATATT
TCTGCAGTTATGCTGACGCACCTCCACTTATAATTGCTGACAAGATCCAA
AGCTAAGTGGCAGCCTCCCAGTGAACGAGATAGTTTTTCTTTTTCTTTTG
CTGAAGCTTGTCTTACTTGTTTCACTTAAAGATAAGTTCATACTGAGTAT
AGTAAAACCAACTCTCACTTGTGTTGGAAATCTTACCAACTATAAACAGT
GCAGCTTCTGGATGGGAGATATTGTGGTTAATACTAGCTTGAGATGAAGG
AAAGAAGGAATTTTCTTGCCAAAAGACTAAGAGAGTTGGACACCATTATG
AAACAACTGCTTGGTACATCTGTCTTGATGAGTTTTAGAAATAAAAAACT
GGAAGATCTTCAAAGCCCGCAAAACTGAAGGAATGTTATTTAATGCTTCC
AAGCAGCCCTGGGCAGAAAATAGAGTTTGGCACTTAAATGTTTTCCTGGA
GGACATTGTGGGATATATTTTACATGTTAGTTTTCAAAGTCATGAATCTC
ATGGACCTAGGGACAGACTATTCAGTCCCTAGCTGTCATTTGACTTCTGC
ACACAGAGGACTACACAGTACCAATTTACACCACTTTCTGGTTGGCTTCA
TTTAATATATACTCGTACTCTGGAATGCGACAGGGAATCAGCCTTAGTCT
AAAAGAGGGGCACTAACCTGCCCTGTAGCTACACATTGTGGTTTTACAGT
CCCACTCTTAATCTTGTCTCTAGTGTTTTTTATAGGAAGAGGGTTACTCA
TTTTATCCCAAAGTCCAAACATTATCATTGCTTAAGGGTGTTCCACAAAC
AAATTAATGCTCGAGATTTCTTTGAAAGCTTCTGGCTGTAGAAAAGTAAA
AGCTCCAACAGAACTGGGTCATGCCACTGGTAATAGACACATCCTGACTT
TGTATGGTTGAATATCTCTCTGACGGTAGGTGGAGGAGACAGGGAGAACT
GTCTCTCATGACCTAGAGGTGGTTCCTATTAAAGGGATAATAATCGACAA
TATTGCTATAAACTAGATTAAGTTCTGAATTAATGACTAATTCCCGCTGA
AATGCCAATCTTACACTTCTAACCACAAGGCAGTACTAATCATGGTTGGA
GGAACGTTTACTCAGCTTGGAGGAATAGGGAATGCAAGAGGAGTATTCAC
TATCTCCAATTTGAGTAGGAAAGGAGAGTAAAATGTTTAACAGTACTTGA
AATACACTGTCATCTGTCACGAGCAGTGCTTGTAGAAAACAGCAGCAAGA
TCTTGTGGAAATGACAAGTAACTTCACCTTGCCTCTTCCCTCATGTGAGA
CAGAACTTTGAATGACAAATCCCTTATAACCCTGCCTGACCATGCTTACC
CACTGAGATATTTCAATGAGTTCAGACTAGAGAGCTTCCTGTTGAAGAAT
CATGTGATTTTGTCCACTGGCACCACTTCTGCTATAACAGGAAATTAAAT
TCCCCCAAACATGACTTCTAAATGCAATTCAACGTACTGCTGGTCAGAGT
CTGTGCTAGTACAAAATATAAGGCAAAAACTCTCCCAGATCCTTGGTCTA
GTGTCAATTTACTTCAAACTACCAGCTTATTTCTTAAAATCAAACTGTTC
TTTCAGTGTATCTTTGCATTGTTCTCTGAATAATTCTACAAGTCCTCTAT
GATAATTTAAAAAGCCCTAAAATTTTAAAAACAAACAACAAAAAACCAGC
AATCAAATAACTCCCCCCACCACAAAAGCAACAACAAAAAAATCCCACTA
ACAAACCAATAAAAAAATCCTCAAAACCCAACAAATAAACAAACAAACAC
AGCATAAACTCCCCACACCGTTTTCTTTCCCAGGGCCACTTTTTTTCTCA
CTTCCCCATTACCCCAAACAAAAACAAATTTTATTGACTTTGATGTGAAG
CTTTAAACCCCTTTAGAGTCTGCTGGGAAACTTTCTGCTGTGCTGGGAAA
GTGCTGGAAATTAATGAGGAATTCTAAGCTCAGTTTTGTTAAAAATGGTA
ACACCTATGTCTGTCTTATTCTGTGAAAGAATTGGAAAACAGGAAGTGTA
GAAGCTTTTGTAATAGAGGTTCTAATAGATCTGTGTTTTTCCATCTGAAC
TTTTCCTTCTCCGATGAGCAGTAGATTATTTAGAGAAAGTGTCAAAAAAT
CCACAGCAGTAAGGCAGGGAATGAAAAGTTCCCTAACAGCCTTCAGAGTT
TAAGTTTAAAAAGGATAGTCTGACCATTTGCTCTTCTTTCCACTTTCATT
CTTGCCAGAATTGCTGCCAGTGTGTATCTGTGGTATCTCATTAATGGAAA
TGAAAAATGACTAGTTTTGATCCCAGTAAGGTCCAGTAAGGTGCAGGGGA
AAACCATTCATCTGGTTGAATTAACTCAGGAATTCAAGTTACACCTTTTG
ACTATAAAATCCAAAACTATCTTTTGCTCTGAATATAGAGTTCTTAACAA
AGCAGAGTCTGGGTGAGTGAGGACAGGAAAAAATAAGCTTCACACTGCCT
GTTTTGAAAGTGACAGGTTAAATCCTCAAAGATGCTGCACACCTACAACT
CCCATTTAGGTCTCCATAGCAAAAAAGTTATCCTACTAAATGCTTAGCTT
CTTCCACTTTCCAGGATTTGGACCTTTCCTCCTATTTTAGAGAAATCTGT
GTTGCTCATGCCAGCTTGAATTCTGCTGAAAGGAAGGAATGTTCTGTTTA
AGCCTCAAGGCCTGGATGAGAGATTCTTTTTTTTTTTGTGACTCAGTGCA
TGCAAAGCAAGGATGATAATACCTGTGAGGTGTGAGGATGGGGTAAAAAA
AAATTATGAAAATGGGATCAGTACACACTCAGATCCCTTTTGTTTGTCTA
ATCTTGTTTATCATATGCATCTTTGTAGGTTTTTTGCTACATCCAGTCTA
ATATGCACCTATCACATGTTTTGGTTTTGGGTTTGTTTTATTTTTTCCCC
ATTGGGAGATTTTGCATCAACCATAGTGTTGGATACATCTCGGTGTTAAG
GGTTTCATTGAAATTCTCTTTCTGTGAATTCTTATTCCCTTATCTGGGAT
AGGATTTGCCAAGAAGGACTTCTCTGAAGTACTTATAAGTGATTCACTCT
CACATTCTCTATCAGCAGTTTATCCAGTTTCCAGAAATGTTGGGCAGAGA
AGTGGAACCATGAAAATTACCTCGTGGACAATTTGTTGCTGTAGCTGTTG
TTATTTTTGCCTAAGATTCTATTAGAGTTAAATATGCTATGACAGCTGGA
GGTATAATCTTTTGGATAGGAACTGCCAGATTTGAATATAACTATTGTAA
AAAGAGAGATGAAAATACAAATCTGAGGGTTAAATCTCTGATGGTGAATC
TTATTTCAGTGGCTGAATGCACCATAGTAGCCCTGTTTCACTTTTCTTGT
TAATCAAAAAACAAACACACAAAAAAAAATGGTGATGGGGAGCTGAATGC
TGAAATAATTGCCTAATAAAGTAAAAATAAAAAAGAAAAGGGAAAAATCT
CCCAAGTTCCTATTATAATTACAAGTTTAAAACAGTGTCAGGATTTCGTC
AGGGCAACCAAATATGAAATTCCAGTTTTGGACTGATATGCTAATGTGAG
AATCTCATAATTAAAGGGAACTTGCTATTCTTAAATTCTACATGTTCAAT
TAATAAGGTTCATCATGGAATCTACAGCCTCTTCTTAATTTATAAAATGT
TTTCACCGATGAAACTCCAGTAGTTATTCAGGTCTTTCCACAAAAATTTA
AAGCAGAGAATAGAGTATCAGCATCCCATACTTTTCAAGGAATTTTCATA
ACATTTTTTTTTAAATAGCCACTCCTGCTCAGCACTGTCATTAAATGTGA
TTGAACGAAAAAAAAAAAAAAAAAAAAAAAAAAAAAAAAGAAGAGAAAAA
ATGATATTTTTTTCTCCCTCCTCTTCTCCTTAAGAATCTGAATAGATTGC
AGGGGTAATTTACCTGCTCTATTTCTTCATGACAGGGCAAGGGCTCTTTA
AACCCTCCTGCTTCTGGAAAAAAAAGGAAAATTAAGCAATGGATAAATTA
AAACAACATAAAGCAAATTACCCAAATAGTGAAAGATTTTTTTTTATATT
ACACTTACAAAAAAGCAGATTAGAAAGGTATCTGAAGAATAGAAATTATC
ATTTTTTTATATGATGATATATCAGAGTAGGATGTCTGAGATCCTTAAAT
ATAATTAGTTTTAGTGAAGTCAATTGAACTATTAAGATAACCCTTGTAGT
TCAGGTAGTTGAAAATATATACTGCAGTAGTTTGTTAGAACAAGTCGTGT
ATGTCCAATTACTCTGCCTTTCATGTGAAAATAAGGATAATAATTTTACC
ATAATCTTATTTTAAGGATAAAATCTCTTAAAGTCCAGATGCCATGTTGA
TAAGATAATCACATCTGCATTGTATTTGTGACTTTCTTTTCACTTGATGA
TGTCCTATTTGATTTTGTTATTCCATTTAAAGCGGAATATTTCCAAAACA
ATCAGCATTGTCTCATTTATGTTTCTTTTTGACATTCTCAAATTTAAGTG
TTCCACTTTATTTTCATTGTAAAATCCCTGCTCTTGCATCATGTTCCAAA
TATAAAGACTGGTAAATTCTGAGGTTCAAAAGTTCTGCTTTTAAATGTAG
TACTTTAGGTTAGCAATCAGAGACTATTTTGAAAATGTGGTGCCTACAGT
ACATATGAATATGCTAATCAGCTAAACTTAATAGTTCTCATTTGTATTAA
TGCAAATTAGGTGGCTGTACTTTCCACCAAATATTTTCCTCAGTATTTAT
TAGAGAAATCAAAATCTCTTTCCACCCATAATAAGTCCTAATATTTCATC
TTTATATTTTAAAGGGTATGTTTTATTTTAGCTTAATCTAATTTCATTGA
ACAAAATTGCATCTAAAGGCAATATAAAGTCACAATTTGTTCCATGTCAA
ATAATAAAAATGGACTTTTAATTTTACATGAATTTGGCCTTTTGGTTTGT
GCATTTCAATTAAACCTCTCTTATAATCCAAATGGTAGAACATCCTTTGT
GCTCATTTGGTCTTGTAGACTGGCATCCAGATGTACTCCTGGTGCCTCCT
TCCCTGTAGTCTTCATCCTTTCTCAACTCTCAGGCTCAATTTACCCCTTT
GAAGAAAGATTGGGCTTTTTCTGCTTACCCAAACAAGTCTTGCACTAGCT
GGAAATGAAGCCACGTGTGGTAGGATGTGTCCAGCTTTCAAAAGGGAGTA
AGGATTGGCAAACATTCATAACAATCTGGGCTTGCTCGGGCCTGTGGACC
CTGAATCTGGAGCTGTTACTGCTTCAAATTTCCTTATTGAACACCAGGAG
AGCCCTAGAATTTAGGTGAATCCCAAAGAGAAAATCTGTAAGAGCTGTGT
AGAAAAACCACCTCTGTTTTTCTTCACAGTAACGTGCAAGACCATGCTGA
AGTCTCTTATGATCTTTGTCCATATAAATTTGTTATTAATAGCAAAAATA
TTTTTGGTGTTAGCAACTTTCTCTTTTCCACGTGAAAAGTATAGGATTGC
TCCTTACTGTATCATCCTTTGGAATTACATTAATTTTATTTCAGGATCAC
ATTCTCTTCTGAAGTAGAAAAACAAAAGGAACTCGCCATTAATATTCAGA
ATGTTTCCAGTGTGACAACGACCTCCATGATGAAGGGAAAGATCTGAGTT
GAATCTAACTGTTCCCACCCTCAACAGAGATGAGATAGAGCTTTGATGGC
ACACCATTACTATACTTTCCAAAATCTCCCCATCCTCATGTGTGACTTAT
CTAATAGTCACACATCTATCTAATAGGACCAGCTATTCTTTGGTTTTTAC
TCAGTCCCTAATTGCACAGTGGAACCCCATACCTGATTTGTCCATGCACA
CTGCTGTAATTAAGATGATTAATAACATATATTCTGCAGAAAAAGCTGAG
AGCTGCTTCCAAGGCTTGGAGCCTTGAACTTCTTTTGCAAGGCTTTAAGT
GNAGCCTTGGGCTTNATGGTTTGAGAACAACTGGTTCTGTGTTCAGTATA
ACTAATGAAGCCTGATTTTCGCTGGCATTGTGTCTGGTGGCCAGAACTGG
TGGTCAGGGAAGGTACAAACCCTGATCTTGGGGCTGAGGTGTTCAAAACC
ACATTCCTTCTCTGTGAGCTCTTTTGTGCCTAATGAGAGTGGGCTCATGC
TGCACCCTGTCTCTAGTGGCCACGCTCATAGAATGTTTCTCTGCCACTCA
GATGCTTCTTTCCGACACTCGTAGTAATTTAATGCCCTTGACACTTCCAA
CCCTCAGCTAAATTTGATTGAAATGAGCTAATCAGTCTGTAAAGTGAGAC
AGACAGACAAATAGGTAGAGATGTGTGTGCTCTTTGACCATGATAAGCCT
CATTTCCTTCAGAAACTTGGCTGAAGGAATAAAATCCATGATGCTTTTGG
TTTAATTTTGGTTTTCCTTTTTTTTTTTTTTTTCCTCCCAGGCAAGCTAA
CCTCAGCCCTAAGAGCAGAGCAACCCTGACGTCGGAGTTCAGGGAAAAAG
AAAGGGGAAAGCTATTCCAGCGGGGGAAAAATAAAGGAAAGGTTTTTTGT
TGGTTTTTGTTGGTTTTTTTTGTTTGTTTGTTTTTTGGTTTTTTTGGTTT
TTTTGGTTTTTTTTTAACTGCTGTAGAAATCAAACACCAGATCTGTAATG
GAAAAAGAATTTTTTTTTTAATTTTTTTTTTTTTTTTTTAAGGAGAAGGA
GAAGATGGGAAGAGGAGGAGGGGAAAAAAAGAGCTAAGCGACTGTCAGAT
CAGCTCAGGATCTCCATTAGANTGCAGAGTGCTCCAGAGTAATTACAAAA
CAGCTGTAATGGAAAATTGGTAGTCAAACCCATTTTCCACCAACTAGAAC
GGTGAATGGGCTCCATTATGTTCCTAATTCTCATTAACTTAATTTGCATA
GGAAACAATGAAGGAATACCTAATGAGTTAGACTCAGCTAGCATCAGATC
GATNCCCCTGTGAACAGGGGTTCGACCCACAATTACAGGACATGTGGCAA
AGCCAGAATGTTTCTCCTCTTACATAGGGGAGATGGAAAGGTTGGCCTCG
CTGTTGTTATTTATTTAAAGGCTGGAAATGTGGCGCCTACAGGGGCGGGA
ATTTGTTGCTGTTTGGGGGTGGGTGGNAGGGGGGGTCCACTAGTTTTGTT
CTTCCTCCTCACTTTGCCCTGTGGCTNNTAGACTCTGAAGAAATNCATCN
TTTGACTTGCACNGCTTCTTTAAAGAAGGAGATTTTTTGAAGCGATCTTT
TTAGCCCAAGGTTCAGCAGCTGTGATGTGCTGGTGCTGTGCACTGAGGCT
GCAGCCAGCACACCCGNTGCCCGTGCTCTGGGCACAGCTAAAACCTGGAC
AAACACGCGTCGTGTGTCCTCACCCCAGACTTTGAGCCCAGCCAAAAGGC
AGAGCCGGCTCACCTGGGCTCAGCTCTGTGCAAACACAATCACACGGTAT
TAGAGGACCAGCAGATGTAAACACTGCTGGCGCAGGGTGCGTGTGTGTCC
CTTGGCAGTGTAATCCCGGGAAGGTCTCTGCTCAGTTCCAGCTCTTGGCA
GCGTGGCCGTGTTTGCAGTCTTGGCCATGTGCATTCAGCTCTCTGGCCTT
TAACTCCTGCGTGTGGGACAAGCAAATCCCTGCCCTGGTTTAGACCCTAC
ACTGTGTGGGAGAGGCTCTGGACAATCCAAAAATTGAGGTAATCTGAATG
AGGAATATTTACTCTCACAAGACTGTGAGCAAGGTGGGATGCTGCCGCTT
CTGTACATTGAGACAATTTTTCTGTTTTTCCTGATTTGTCAGTCCTAGAC
ACAGTAGCTAGATCATGCTTATAGATATCAGTACAGTAACTGGAAGAGGT
TGAATTTCTCCCAATGGTTTCATAGCTTAATTTAGTATGTATTGTTCTTT
CTGAGTGAAATTTCCCTTGTGAAGAGGACTTTTGAGAAAAAAAAAAAAAA
AAAAAAAAAAAAAAAAAAGAAAGAAAAAGAGAAATTCCAAAACCAGCATT
ATGTGAGTCCTCAAAAGAGTTTTAAATTAATGTTACCATATTTTTGTATG
TACTGCAGCTGTGCAGTCCTCACAATGCCAGAGGGAACATGCTGTGGCAG
ATTCCGTAAGAAATGCATAAAAAGAAACAGTGCCTGCATTAACAACCTCA
AAACTCACCCAGATCAGGAAAACAGAGGAAATTGTCCCATTCTCCTTTTC
ACAGTGACCAAAGTCACTGAATGATTCAGTGACAAGTCCAATGTCAGGCT
TAACTTCAGGTTGCTGATTTATTACTATAACATCTTTCATGCATTGTATA
AGCAAAAAATTATAGGATGCTTAGATTTTCGTGTCCCACCATGATAATTT
TTCCATGTGATATAAGAAAAAGGAGGTGGCACCATGAAGGCCTCATGCTG
TGAAGGCATGCCCTAGCTGTAGGAATCTCTAGCAGACATTGTGTTCATGG
GTCATAAGGAAAACTTTGTGTTCATGTCATGACTGTAAGTAAAGTCTGGG
TGTTGGAAAAGGCTTTTAGCTTAAAAATCATTGAATCTTAGAGTAGATGA
GTGATTGTACAGTTATGAGATCTTCAGGAAATGGCATTAAGTGGGAACAA
CTGGGAAAGCATCTCCCTTGTGTAATAGGTTACATGACAGGGAAGGGTGA
CAGATTTGCTCTCAATGGGGTGAGGAGCATCTGCAGGATGCAGATGAGGT
GACCAGTGGGTTCTGCCTCATTTCCCCATGGCAGGGGTCAGCAGGTGGCA
CTCACACACAGCCTCAGGAGGTGCCAATGCCACTGGAGTAGTGGCAAGTT
TCTCTTTTTAGAAATGCTGCATCATTCTTAGATCTTTGCTGCAGTTCCTT
TGTGGGAAGCTGTGGCAAACAGCTCAGGAAGGGATTTTTTTGTTTTGTTT
TCTTTTTTTTTTTTTTTTTTTTTTTTTTCCTCTGTCATNGCATTTCTGAC
TTAACACAGAATTGTGCTTTGGGAAGTGGTTTGAAGTCCCTGAAAACCGG
ATGGTCCAAACTTTCATTTTATAAGTTCTGATAAATAAATAGCATATATA
TATAATAGCAATACATTATCAAGCTGAACCCTTATATAGAGTCATGAATT
CCTTCTTCAGCTGCAAGACTAAGATATGTGCAAAACCAAGATATCTGCCT
GCAATAAGAAGTAGCACTGTTCAATGTTACTCAATCTCTTAAAAAAACTT
CTTATTAATATTCTTTGAAAATGTTTATTAATGTCCAATTTCTCATCCAT
TTTAAAATTGAGAATCTTTGTCGAAATCAACAGTATTTTTTTCCCTATTG
ATGTGCTGGTTGTGTGTGATAATTATAAGTTTGTAGCTGGGTAAAGAGTG
TACAACACTATTCTGGGCCTCTGGACACCAGAGGTTCATCTCCTGTGTAA
TTGACTCAGTGAGGGTACTTGGCCAAGTGACTTTGTCATTCTTTGCTCCC
CTTCTCCTTTTCATTTGTTTTCCATCTTCTCTGTTCAGATGTCTCTGCTT
CATGTTCTCACTCATCCTTTCTTTATCTGATTTCACCACAACAAATAGAA
AAATAATCACAATAATTTAAAGTACATTATTCTGGGTTTTGACTCAGGAC
AAAAGCCTTTTGTCAAGCTTGAGACTGCCAGCTTTGGTTGGAAGGAACTC
TAAGCTATCAGTGCATTTAAAGAATTTTTGGAAACCAATCTTTCTGAAAG
ACAAAACCTTGAATTCACCCTCCACTGGTTAAACGAAACTCAGGATCCAT
GGCTAGTAGTTGAGAATTTCATTCTGAATTATCGTTGCTTTATATGACTA
GTTACATTTGTTTAATTAAAGTAACACATCTGTACAGTAAATAGCCTGTG
ATCGGGCAGTAACATAATACTGTACAAGCACAGCAGTAATTGGATAGCAT
AATGAAATGCATGGTGGATTTTTTTTTTAAGAAAATATAATGAGACTTCA
TCATTTTATACAAACAGGTAATTAGTTCTTAGAAATACGGGTAGAGTAAA
TTATCTGCAGATTTGAACTGTCAGCAAGTATTTTATATAGCCCAGCTAAA
AAGGTAAAAATGTTCTGTTTTAAATCTCTTGAAATTCAAACCAAAATGAG
GCCAATATGAAATTAAGGTACTCGTAAGAGCTGAAAGTATTCAGTTTTAT
TTCAGGCCATCTGCCATAATGCCTACCAAGCTTGTGGGGGGAACTTGTGT
AGGTGACAGCACGTTTCCCACTGCCTGGCCAGCCATCTCCCATCGAGATC
ACCATGCATGAGATTCCTTTTCTTTAGACTTTTCAGATTAACTTTTTTTC
AAGCCCATTCACCAAATTTGAAGACACTTCCAGCAAGTGGACGCTTCACA
AATCAGGGGTTGGGTGTGATAATNGNNATACGTNTNCAGCACCAAGGATT
GAACCAGGTGCCATCCAGCCTGAAGATACAGTCAATGCAGATCTGCTTCT
GGGCTAATATTGAATCTCTGTTCCTCACTTTTGGGAAATTAATGCTGTTC
CCTTTTCGTGTCACGATCACATCCTGGTAGGGAAAGGTGAGGAGGAAGAT
AAAACACCTTGCATAGGGTTAGGCAGGCAGGATCAGAAGTCAGGGGATGC
AACTGCCGGCATTGTGTCCTGAAAACAATCCATCTTCCTGCTCAGACAGT
CCTGATGTTTAATTGATACATTTCCGCCTTCCCCCTTGCTGTTAATATTT
AAGCAGGTGAGCACAGCGGGCAATGGGCTGCTTGCAGTAGCCAGGTGGCC
CTGCCAGCAGCCTGCTGCACTGATCACCTCCCCTGAAATTTGCATTGCTT
TTGTTCTCCTCTGAGTGTGCACCAACAGCCCCAGTTTCAAGATGCAAACA
AACAAACAAATCTCTAAACTTCCTCTGAAGGAAGCCTAACCCCCTTGAAG
AAAGTTCCGCAGGGCCACCACTAAATTCTTTTATTCCTCTCTCTCTATAT
TTTTTTTCTCTCTCTGCCTTTTTGCTTGGCTTTCACTCTTGTTCTCAGCA
TCGCTTTCTTTCCCTCGTACTTTGATGTTTCTTTGGGGACCGTGAGGAAG
AAAAGCAATAACAAAACAAAGCAAAACAACAACAGCAAAAATGGAAAAAA
AAAACCAAACAACAAAACAAACACTAAGTCATTTATAGTTTGTATTCACA
TTAACTACACCTGCCAAAAAAATGGGGGAGTATGGAAAATGAAGGGAATA
TAACCCATAAATACAAAGGCAGGAAGACTGGTACAGGGAACCATTATCCT
TCCCTAGGGTCTGTGCCCTGAGAACACAGCCTGCCAGTCATGCAGAGTGA
AAGGTGCTCTGCCTGACTTTACTGGATCATTTTCTCTTCCCCCATCCCAC
TCTGGCTCTTTTCCAGAGCAGCAACCAGGTTGCAGACAATTGATATATTT
TCTCTTGTCTAAGGGGCAGTTGGTTCAGGTTAAGAGCCTCCAGCATCCCA
TGGTCACCTGCTTGGTGCAGAGTTAGATTAATGGAAGTAGTCTGTGGTTA
GTGTTTGCCCAGTTATCACTGAAGTGATATTCTTCACAAATTCTTCATTG
TACAACATTCAGGCCCATAAGAATCTGCCCTACACCAGTCTCCTTGCACT
GTAGCTCAACAGCACAGACAGCCTGGACAGACTTGTGCTCAAGTTCTCTG
CCAGAAACGGTTTCATTTTGTCAATTTGTTGGGTTTTTTTTTTTTTTTTT
TTTTTTTTTTTTTTTTTTTTTTTTTGTTTTTTTTTAATATTGAAGGGGTT
AAGAAGGTACCAAAGAGCTTATTTTATCTTTGTGCCATTCAAACCTCTTC
TTTGGCAGCCTGGCTAAAATGAAAAGATTGTCCTGAGGCTTTCTCAGAAC
TTTGGACTTTCTCAGTTTATTCATGAACACCTCTCTGAGAAATTCTGGGC
ACAAATATAACATTTCCATGCATGAAACATTGTACTATCTTGAAGCTAGT
ACAGCCATCCACAGCCGAGGAGGTCTGAATTTAAATCACTATAAACACAG
AGAGAAGCCAGACTGTGATCCAGCTGCTGAGATTACAGCAAACTTACAAC
TACCAACTTGGCTAAACTTGAAAGAGCATTTGTGTCCACAAATGGAAGAA
GGTAGGCAATCATTCAAGCAATCCAGAATTAGGCATCTGTTTTCCTGAGA
ACATCAGCTTTAATTCAACTGACTAGCTTGAATGTGTTTTGTTCTGAGAA
CATGAACTCAAGTATTCATGTTTTTTTTGTGTGGTCATTTAAATCTATTA
AGCCCTTTGCCCTCAATGCATACTGAAGTTTGATGTAAAAGATCATCCTG
TTATATTCACTTTAGCCATTGTATCTTTTGAAGTTTTAGAGCCCTGTGGA
GAGTTAAAATAATTCCAAAGAATCCCAGCACCTGAGATTTCCTGATACTG
AGAGCAAGTGTCATCCAAAGACTTGCAAATACCCTGAGTTACAGACAGAC
AGCTCTGTTGCTTTTTCTGCTGCGATTTACCAAATGTCCTGGTGAGTCCT
TGTCCTGGCTTATCTAATGATATGAAAGTCATTGTCCTTATGAATTTACT
GTTTGGTTTTGATTTAGTTTTTGTTTTGTTGTTGATTTTTTCTGATTACA
TCTAGCTTATTGTCACAAACATCTGGCTTATTGCTTAGCAAAAAAAAAAA
AAAAGCTAATATTCCTATCCTTCTTTGACACAAAATTCATTGTCCTGGCT
AAACCTATGGATCTGCAAGGATGTAAAGACAGTTATAGTAACCCATCTCT
TTGTTTGAAATGCCAGATCATGACAAAGATGTTCCTGTTGCTGTATGAAA
GAACACAAACCTGGATCAACCAAAATAGTGGCAGTTCTGAAGAAAAAAAA
ATGTCACTTGGAGAAATTCCAAATATTAATCTTCTAGCACATTTCTTTGC
TTTATGACACAGAGCTTATACTGTTAAGGAGTTAATACTAGCAGAAGTTC
TCCAACCTCTGTGATTCTCTTGATGGGCCCTCAGGTGGCTGAGAAGTGGT
GGAAAAGAGCAGGAATTAAAAATCTGTCAGTGGGAGAAAGGACTGGAGTG
GGATGGAATGTCCTCCTATAATGCTGACTTTGAGGAAACAACTCAGAAAA
GATGTTTGATCAATCCTCACGCACTCTCCTATACTTCCGCATTTCCCCAA
GACTTTTTTTTTTTTTTTTTTTTAAAGATAAATTAGAAACTTTTCATTTA
TATCTGAAGCAGACACATTTAATTAAGAATATCCNCTGAAGTGAACATTC
ACAGGTTTCTTACATATTAGTCAGAGGTGGCAGTGGTCTCTCATGCCCTT
GAATAAAACAATCACAGTGATTTTGTTGTGTGTGTTTACTGTGTTTATAT
CAGGGAGCTCAACATCTAAACCACAAAATATCAATTTTACCACAGATCCA
TCTTATAATTGAGGCACGGGGCAATCAAAAGGTTCCTTTGTATTCGTTTT
ATTACATCTTCTGCATCCTCTAGTTCTTTGTATGATGACAATTTTTCTTG
CACATGTGCTTTGTCTACAATGAAGCACTTTCCTCCATTCTTATGTTGGG
ATGCAGAGGGCATTTTAATAACCCCATTTCATCCACAAAGAAAGAAAAAT
AGTAAAGACCAAGCGATTTATTTATGTGGACAAAATGGTTTGATGCTGTT
CTTGTTGACAGACTGATCTGGCCAGAATTACATTGTATTGATAAAACTGT
GAAGGAATGCCATTCATCGACCACATGAAGTTAAGGGATTGGGGAAAATT
AATTTGNCCATAGAACCTTCTTTCCCAAGCTGTCAGATGTTTCTGGAGAT
TTGAACAGCCTTGTGTTCACATTTGTGTTCACATCTACTTTATCTTTATT
TGTTCAACCATTTTGTCCTTACTGGCACACATTCCTGTAAATTTGGCAAA
ATTTGAATAGTAGGCTTCAGCAGTTAGCTACCAACACCTAATACTTGATA
CTTTTACCTCGGTGGGTCTCCAGAATATTTTGAGCTTTCCCTATCACTAA
ATAAGTAAATTGCTAGTGAACACAGCAGTGATTTTTTGAGATTGTGCAAG
ATTTCCCTTCTCATACACCAGAATACACAATTTAAAGACTTGGGACTAGT
TACTTCCACAACAGATTCTTTCCATGAATGTCATAATTCTCCTTGTACCA
TGTGATTCTTATAGTTAGTTTGCTATCCTCAGACTGAAAGGTGAGAGACC
TGTTCACATAGAACAAGATGAACAGATGCATTTTAAGAGGGTGGAAAACT
CAAACAAGTCTTAGTATCTGAAATCATCCATTACATCAATTTGTNTATTT
TATCTACTTTTCTCTTGGGTTCTGCTCATGATCCTTCTGTAAAACATTTA
GTCTCACAAACACACACACACTTGGGGACCTGTCATCTTTAAATAAGGAG
TCCACAGGGAAAGTAAAGTACTTTTAATTTAGATCTGTCTTAACCAGATT
TAAAACGAGCTTTAGATCCCATGTGGTGGTGTAAGTTTGACATTTGCTTT
TTGCTTTTTTCCAAGCTAGCGAGCACAAATGTGCTTCCTCTATAAAGTAA
CAGAAAAGCTAAGATTGAATATAATTAAAATAAAATACAANAATATTAAA
ATAATATTAAAGGAAGGAAATGTAGTGCATAAACTAGTCATTAACCCCAG
CATCCTCAATAGATTTAAATTTGAGTAGCTGTTGGTTGATTTGCTTACTT
ATAATTCCCACTCTAGTCTTAGCTGGATATTATATTCTTTTTTCATTCAT
TAAAGCTTTGCAGCTGCTTCCCACTCCAGTGAGGGGTGCACTGTCATGCC
GAAGGGAATGATTCCTAGTCAGAAAGAAGTTTTCAGTCTTTTGGGAATTT
CTACAATGATTCCAAAGGGGCCCAGGACTTTACCCACAGGCTCATATCTA
TGCTATAGATTAACCTGGTATATTGCATCTAAATTCTCCTGAATCCTAAT
CAAGCCAGTTAAGTGAAATGTTAGTGTAAATAAGTGCACAGACTATNAGA
ATACACTGAAGCTGGATTTTTTTCGTCTATGACCCAAATTTGGATCCTGA
CACTGCANTACTGCCCTTTCCTTTCTCACTGCATATGCACATACATAAAT
GTATATATGTGTATCTACATACAGCTTAGTAAGACATACTAAAATGCTTT
AGGATGAAAGATCCTGCACAACATGTAGTCATAAGATGTTATTTATGCAG
TTTCCTTGGAGGAAGATTAATTGAGCTGAGGTATGTACACTAACACATGA
GTCAGCTGTGGTTTCATCACTGCAGATACATGGCTGATTCAGATGATTTA
AAACACACAGCCATACTACAAAGCAGCTCAGGACAGGAAGTTAAGAATGA
TTCCAAAGCCAGCAGATACTGCAGGAGAAACCTGAGCTGGTAGAATATAA
TTACACCAGTCAGCATGTTGTCTAGGCAAGAGAATGAATATTCTCCTTTC
TGCATGAGAGCCAGAGGCTTCTTTCAAACATCCATAACTCCAAGTTTAGA
CGTGATTATGAGGATTCTTTGGGTTTAATATTGATTTAGAGAGCATAAGA
CACTGGATGGAGTCCTGCAAAGTAAATCTCAGGACTGATAATCCCAGTAA
AGGCTCTAGCCACAGGAATGAGGTCTGAAATCTAGTCCTGAATCTGCCCT
CTTTGTCCGCAGGTTGAGTAACTTCAGTTAGGCACTTGCCACAGTCCCAG
CACTTCTAGCAANTGTATCTGTAGCCCAGCAGCCCCTAGAACCTCAAGGA
TGTGGCCCTGTAAGAGCTGTTTGAAGTAGCTCAGCCACTTATCATAAGAA
CGAGGGCAGACAAAGAAACTGAAACCACACTTTTGAGAATGAAGATGGTG
CAAAGGGACCAGGCAGAATTCTCAGCAATTTGGAAGTATGATTTTGGGTT
CACCAGACACTGGTAGAGTAGAGAAAAAAACCTGTGGCTCTGGAGCCCCT
GGTGGTCTCCTCATAAAAGCATCCTTCCCTGGCTTAATTTAGAAACACAT
TTAACGGATCCAACCTGAAAAACCTCCCATGAATCTAGTTTGGACTGATA
AAGAATCCAGTGTGGCAGAGGGTGGGGACAGGGGTAGAGAGAAAGAGTCC
CAAATTCATAAGAGAGATCCAAGACCAGCCTGAGGATCCAGCCCTCTCAG
CTATTTCACTATGAAGTTGTTGCATCCCTGACATTTATTCCTTGTTAATG
AGAAGGCACCCACTCCTCCCACCACACAACTTGCTGCCAGCCCCTTCTTG
CTCNATTTCATGCCCAATCAATATTATTTGACAACATACAGGTCAGCAAT
GATGGCAGTTATATCAGCAGCATGGAAATCACAAAAGAAACCATTGTTCG
TCTTGAAATTAAGGGCTACTGGGATCAATAGAACATTTGAAAATTGATAT
CGACCACTCTGTGTTTGTATCTTTGTATATGTGTGTGTGTATTTGCATGT
TTATGT
>oenMel6-2487#LINE/CR1
AAGAAAATGATNAGGGACTGGAAGCATCTCTCNTACGAGGAAAGGCTGAG
GGAGCTGGGCCTGTTCAGCCCGGAGATGNCTGAGGGAGGACCTCATCAAT
GTGTGTAAGTATCTGAAGGGAGGGTGTCAAGAGGACGGAGCCAGGCTCTT
CTTAGGGTGCCCGGCGACAGGACAAGGGGCAATGGGCACAAACTGATGCA
CAGGAAGTTCCCTCTGAACATNAGGAAGAACTTCTTTACTGTGAGGGTGA
CTGAGCACTGGAACAGGCTGCCCAGAGGCTGTGGAATCCTGNGCCGCGTG
CTCTAGGGTGACCCTGCCTGAGCAGGGGGGTTGGACCGGATGACCTCNAN
GGTCCCTTCCAACCTNAACCATTCTGTGATTCTGTGACGAACTCAATTCC
ACATTTAGC
>oenMel6-462#SINE/MIR
ACTAATTGTGTGTTCCTCATTTTCCGGATGCCCGGCTTGAGACCCTGGGG
NCTGATTTGCAGAAGTGCTGAGCACTCGNAGCTGCGACTGAAGTCANTGG
GAGCCGTGCTTTGAACATATATCGGCTCTAAAAACGCTAAGNACTCTGAA
ACATTCAGACTGGGNCCCCAAAATTAGTGGGTGCCTTTGACCTTAATCTC
TCTGTGCCTCAGCTCCCCGTCTGTAAAATGGGAATAATAATCCTCCTTAC
CTCACGGGGGTGTTGTGAAATTAANTTCAAATGCTTCTGTGAAGCGCTCA
AGCGTTCTGCGAAGCGCAGCGGAAAAACCCAAGAGGAAATTAATAATTCT
GTCTCCGGAGCANGTTCTTTGGACGGTATGGGTAAATAAGGCCCGGGCCA
CACT
>oenMel6-4460#Unknown
ATTTCCCAGGTGGGAATTCCCAGCTGGGAATTCCCGGTGGGATGGAAATT
GGGAATTTCCGGCTGGGGAATTCCCTNCGGGATTTCTTGGGACGGGATTT
GGGANTGGGATTCGGGAATTCGCCGGGGATTTGGGATCTGGATCCGGGAT
TCCCTGGGATAGGGGCTGGGAATTGGGTCTGGGATCCTCGGGATGGGAGG
GATCGGGGATTCCCTGGGATTGTCCCGGAACCGTCCTGGGAATTGGCCCG
GGATTTTGGGCNGAGGNCTGGGANTGGATCTGGGATTCCTTGGGATTTGG
GTCCGGGAATGTCCTGGGATCGTCCTGGGGGCTGCATCTGGGATTGTTGG
GATTCATGGGNTTGGGATCTGGATTTGGGATTGTTGGGATCGCCCATGGG
AAGGGNCTGGAAGTTTGGGATCCAGGATTTTTGGGAAACCCGGAATTGGA
TTCGGGATTTTTGGGAATCGAGGAGCTGGGAATCGGCTCTGGGATTTCGG
GATTCCAGAAGGATTTGGGATTCCCGATCTNGGGATTTTTGGGATTTTCC
CCCGGGACCCGGATTCGGATTCGGGATCATTTTGGGANCCGGGTGGGAAT
CCGAGATCCGGGATTGTTGGGATCCTTGGGATCGGGATCCGGGAATTCTG
GGATCATNCTGGGATTTGGATCCGGGATGCTGGGATTGAGGGATTTGGGA
TCGGTCTGGGATTTTTGGGATTGTCTGGGATTGGAATNTGGGATTTTTGG
GATTGGAGGGACTGGGAATTNGATCTGGGATTGCTGGACTGTTCCCATTC
AGGGCTGGGATACGGGATTCAGTCCCGGGAAAGGTTTGGGACTGAAATTG
GTGAATTCGGGCTGGGAATTCANTCCGGGAATGTCGGGATCACCCTGGGA
ATGGGGCTGGGATCGGATCCGGGATCATCCCGGGATGAGGATGGAACTTC
TGGGATTATCCTGGGAGATTTTGGGATCCTGGGATCTGCATCCCCTGCGG
GGATTTCCTCGGCGTTCCCACCCTTCCGAGATCCCNCTCACCCCAAACAA
TCCCAAATAAATAATCCCGAACAATCCCTGTCTCCGGGACGGGGCTGACC
CCCGGAATTCCCAGAACTTCT
>oenMel6-3536#DNA/CMC-EnSpm
GTGTGAAAAGAGAGTAAATGTCATAATCCCCTTACATTTTCTACCCTTCC
CTCCCCAGCCAGGGTGCTGCCTGAGGGGGTTCCAGNGATGGACCACAACT
CACAAATAACCTCAGTCAGGTTCTATTACCCACAGATTGACAGACCTGTG
AGGAATTGGCTGCCACAGCCTGTCACACACTCACCAGAGCTTAAGGATCA
GTGAAAAAATAGGGACAAATATTGATGTGGTCGCTCATCATGGAAATGAG
AAGTGCCCCAAAGCCAATGTCAGTTTCAAAGGGAAATTTATCACAGATTG
TTTCAACTGCCCTGCTTATATATGATGACCAATTTCAGTTCACAGATGGC
TACAGAATGGCACAACTCTGCTGACTCTATAGATAAAGACAGAAATATCC
ATTTCAGTTCCCACAATCAAGTATGTTCCAAGTCACTAAGTACTGCCCAC
ATATATTTCTATATATGTGCATATATGGATGTTTGTATATAAAGTACCAA
ACATCAATGGAATGATCTGGAAATCCACGGAGCAGGAGTTCTTCGCTCAC
TGGAGTCCCGGAGTTTTCTCAGCTGCCTTTGCCTGGCAGTTGTCAGCCAA
CGTGTGGCTCTGCTGCCATCCCAAATCTGCGCTTCCCTTGCCCAGCCTGA
GTGCACGTGGGGCACGTGCTGGGCATGGCTGGAGATTTCCATGGCCAAAA
TCCCCCAGCACCATCACCTTTACATCTGCTCATTGCTTTGGATAGCACAG
AGCACACAACACCCATCTCAGCTGGCAAATGTCATTTCTTGCAGATTGCG
ACAGCCCCACTGCTGGTCGACAAATGTAAGAGAATCCATTTCAGTTGAAA
AATATAATTTACTACAAATTGCTACACCCGCGCTGACAATACAGAACTAT
ACAAATCTCAGTTCAAGTTAAAAAAAGAAATTTATTACATGCGTACAACA
ATGCTATGCAAAAATAAATAAATATCCACTTGAGTTAACAAAAACTTAAT
TTATTGCCAAACTCTACAACAACTCACTATTACACAAACATCAATTAGGT
ATTAACAACTTAATTTATTACATATAAGCATAGAGCCTATATAGAAACAC
AGAAATATGCATTCCCTCTCTAAATAGCCCTACACTAAGAACTCGATAGT
TATACATGACTTCATACATCTTTAAATAGAATTAAATACATATGTATGCA
CATATAAATAAATACATATACAACTATAACAATCTATAAGTGTAAATATA
GATTAAACATTACATATTATATGTAAGTAGATCTATAAACCAAACCTATC
ATTATACAAATATCACTGTACAAATCTAAATATTCATGCAACTGCATCAA
TACAAATATACAGCTATACATCTCCACACAACTGTTAATGCAGTCACACA
GAGAAATTGATCAATATACATATAAAAATAGAAAAACAGAATACATATAC
CTATGGAAATACCAATATACGCATTTAAAATTACACACACACACACACAC
ACACACATATATATATATACACACAAATATACATATATATATTTATATAT
ATATGTATATTTGTATATATACATAGCACATCCATAAATATAAAAGACAT
ATGGAAATTCTCCTATGCAAATAACAATCTACACATATAAATATCCATCT
AATTATCCCTCTCTATGTGCAGGTCCATATATCTTTAAAGAGAACTCTAA
GCAGAAAATGGGATTCCAACAGCGCCATCTTCAAAGCTTCTCCCTCTGGC
TCTTGGTCCTGTGCAGAGCAGCTCTCCTGGACAGGGACAGCAGATGGCAC
ATCTGGGAAGCAAAGGGAACACTGAGTCAGGAGCAGGGCCTTTCCCCTGG
CAGCACCTGCACTTCCCTCAGCACAGAGAAAATCTCAGCGCCTCCCCAGG
AGGGCAGGAAAGGAAAAGCAGGCCGAGCGGGCCAGGGTGTGGCGAGCGCA
GCGCGGCGGGACCGTCCCGCAGCCCCCGGCAGCCCGGCACAGGCGGCACA
GCTCCCGGGCCCTGCCGGCACAGCTGCCTTGCCCCAGGACAGCCCCTGTG
CCGGCCGGGGCAGCTGCGCTGAGCAGCCCCAGCACGGGCAGGGCCGCTCC
TGCCCCTGTGCCGGGCACTGCCCACGGCCACAGCCCACGGCACCCTCACC
CCACCCTGCCTCACCGGCCCTGGGGCCTCACCCAGGCTCTGTGCCAGCAG
CAGCTCCCTGCTCCTGCTCCTGCTCCTGCTCGCGGCCTTCAGCCTCTCCC
NNCTGGCTCCTGTCAGTCCTCCTGCTGCCTTCAGGATCTTCATTGCAGCT
GTGGCAAAATCAGAGGCTCAGGAATTGGTTCCAAGGCCTGGCAGAGCTGC
AGTCCCAGACCCCTCTGTGCTCCCTGCTGGCCCCTCCATCCCCTCAGCCC
CGCCATGCTCTCGGCAAACCCCGAGTCCCCTTCAGTTTCTTCAGACCCCG
CNGTCCTCTCACCCCCCTCAGTCCCTTCTCACCCATCCCGTCCCCTTAGC
GCCGCCACCTCCCTCAGCCTGTGCCACTTCCCTGTCACCTCAGTGCCACC
ATCGCCCTCAGCTGCCCCACACCCTCAGCCCCAGCAGCACCTCAAGGTCA
CCGTCCCTTCAGTGCCAGCGCCTCCTCAGCCCCTCAGCCCCCTCAGTCTC
ACCGTCCCTCAGCAGCTCCTCAGGGGACACTGCCTGCGGCCACCGGCAGC
TGCCACCGCTCCAGGGACACCCGGGGCTGGAACTGCTGCTCCGCCCGGCC
CGGCCGCCAGCTCGGACCCAGCACAGCAACAGGAGACAGAGGGCAAAAAC
AAGAGATTAAGAAGGCATCCGTGGAGGGAAAGAGGTAAAAAAAGGCCTNT
ATTTGTACAGATATCAATCTTCGTAACCTATTTATAGAGGTATCAATAGC
TGTACAAATACAACTATATATATGTAAATGTAACTANACATATGTATAAA
TGCATCTAGGCACATCTATAACTTCACATATAAAAACATAATTACATACA
TCTACAACTATATATAAATTAAACTATACAGATCTATTAACACAACTATA
NAAATGGATAGACGTAACTATAGGCATNTAAATACACCTATATAAATCTA
TAAATATAACTATATAGATAAACAGAACNATACATATCTATAAATGTGAC
TATTGACAGAGGGATTTCACCTGCCTGATGGTCACAGGCCCTCCCTCTGT
CTCTTCCTGCCACACAGGGCAGCCCTCCTGGAGAGGTTATCAGATGGGAT
CTGGGAAGCAAAGGGAACAGGGAGTCAGTCTTGGCCCTTGGGCGCGTTTC
CCTTGGGCACCAACTGTCCTTCTGTCAGGGAATGTTCAAGATGGTCTGAA
AGGNAGACTCTCACTTGGAATTTGAAGCCTGATCTTTAGAGAACAGGGAC
CACTCTAAATGCTCAAAACAGTGTAAAGCATTGAAGTATCTTGATAAAGT
CTCAGCNCTCGCAGTGCAAATGGCACCCGTGAGAGCTCGAAACACAGACT
GTCCCAGCTCCCACAGAGAAGCCCAGCCTTGTTCTTTCTCTGTGCTGACA
GAGAGACCTTAGGTCTCACTAATCTGGGGTCATTCAGGCTTCTCCTTTCG
TTACCGCACTTGCGGTTTTCAACTGCTTGGCCTCTGATCTCCTGTTCCTT
GTTTTTCTTGTGTCTCATAACATTTACCAGCAGTCTGCTACTACATTTAG
TCAGTGATTTGGACTTCTA
>oenMel6-4538#Unknown
TTTCCCTCCTCTCAAACCCTCTCCCCCTCCTCCTCGTGTTCCCCTTCTTT
TTCTCCCTTTCCCGCCTTTCTCTCTCCTCCTCAAACCGACTCTTTCCCTC
CCCTTTCGGCCTCTCCTCCTGTTTCTCTCTCTACCTTTCCTCCCTCCTCC
CCGTGTTCCTTTTCTTTTCTTTCTCCCCCCAACCTGTCCCCCCCATTCTC
CCTCTCCTGTCCCTACCCCGCTCCCCTCTCCTGTTCCCCTCCTGGGTCCC
CCGTCCCTCTCCGCCCCCGGCCTTTCCCTCCCCGTCCCGCTTCCCTCCGC
AGCCCGAGCCCTCCCTGCTCCTCTCATCCCTGCGTCCCTGCTCTCCGTCC
CTTCTCCCCTGGCTGTTTCCCGCTGTTCCCTCCCATCCGCCCCCGGCGGG
GTTCCCCCCATACCTATACACACCCTACCCTACCCTGTTCTATTCCTTTC
TCCTCCTGCTCCTGCTTCTACCCTTCCTTCCCCCCAACCCTGGGCCCCCC
GTTCCCTCTCCCTGCTCCCATTCCCCTCATTCAATCCTCCCCTCCTTCCT
CCACCCTCCCATTCCCTTCCCACCACACCTGTCCCTGTTCCCTCTCCCTG
CTCCCGTTCCCCCCCCCCCCCCCCCCCCCCAATTCCGCCTCCCCTCCTTC
CTCCGCTCTCCCATTCCCCCCCCCAGCGCCCCTTCCCCTGTCCCCGCTGC
CCCGCACACCCCGGCGCCCCCCGCCCTCGGTCCTTGGTCACCCACCCCGA
CCGCCCCGTCTGCCCCCCATTCCCATCCTCCGTGCCCGCTTTTCCTCTTT
CCCCCGCCCCGCGGGGTTCGGGGCGCCGCATAATAAAGGCCGGAGAGCCG
G
>oenMel6-686#DNA
AAGAAAATATTTTTCCCTTAATTTCGTTCTCAGAAACGGCTGAACCATTT
TTNGCTGAAGCTTNCCAAANAATTCATCTGAGGCAGACACCCAGCATGGA
AAATTTCAGCCCAAACGGTTAAAGTCTGGCAAAGTTANAAGCAACTGAAA
ACTGGGNCTTANAATGGGAAATGTCAGGCAAGCTTAATTACAGGCAGCAC
TACCAGCTCCACCTATAATGTATACTAAGCCACTAAAATTTCATACTGGC
TTTGCTCTGTCTGTTTTTCTAGGAATATTGTACAT
>oenMel6-8565#Unknown
TTGGGGGAATTTAGGGGGATTTTGGGGTTTTATGGGATTTTGGGGGGTTT
TGGGGNATCTTTGGGGGTTTTGGGGGAATTTGGGGAGATTTGGGGGGTTT
GGGGGGATTTAGGGGATTTCGGGGGGTTTTGGGGGATTTTAGGGCTTCTC
CGGAGGCCCCCCAGACCCCCCCAGCCCCCCCAAAAACCCCTCCAGACCCC
CAAAACCCCCCCCCGGCTCCCCTCGAGGCNCCCAGACTCACCGNGGCCCG
TCCCGGATCGGGGGGGCACGGGCCGGTGGAACAGAGCCACTTCCAGGGAC
CCTCGAGACTTTCTGGGGAGGGGGCACCGTGGGAGACCCCCCCAAACCGG
GGCGGATCCCCCCCCCCCCAAAACCCCTCAGAGCCCTCATGGGGCCGCGG
CCCCCCCAAGGACCCCCAAAACCCCCCAGACCCTCCCAAAATCCCCCCCA
GGNCCCTCCCAAAATCCCCCCAAAGACCCCCCAGGACCCCTCCCCAAACC
CCCCCAGGACCCCCCCAGACCCCCCCCAGGCCCCCCAGACCCCCCAAAAA
CCCCCCAACCCAAACCCTCCAGGCCCCCCCAGGACCCCCCCAAAACCCCC
CCGGGGCCACCCCCAAACCCCCCAGACCCCCCCAGGACCCCCAGACCCCC
CTAAACCCCCCCAGACCCCGCTNCAGCCCCCCAGCCCCCCACCCCCAGCC
CTCCCCCACGCCCCTCCCCCACCCGTCCCTGCGCCNCCTCAGCAGCTCCC
GCAGCCCCTCGTCCTCTCCCGGCGCCTGCCCCGCTCTCTGCAGCGCCTCC
CTCAGCGCCCGCCCGAGCCCGGGGAGGGGCCGGGGGGGAGGGGCCGCCCT
CTCCGTGTCCGGCCCCGGGGCAGAGGGCGCCGCTCCCGCCCGGCTTCTCA
TTGGCTGCGGCTGCGCGGGAGGCGGGCGTTGCTGAGGGGAGCGCGCGCTG
ATTGGTTGGTTCGGGGAGAGGCGCGCCGCTATTGGCTGGGAGGGGCCCGC
GCGCGCGNCGGACGGGGTGCGGGGGAGCGTGAGGGGAGCGAGCTGGGGTA
GGGCTGGGGGGAAATGGGGGGATTTGGGGGTCCCCGGAAGAGTCTGAGGG
GAATTGAGGTGGGTCTGAGGGGCGTCTGGAANGGATTTGGGGGGTCTGGG
GGGATTGGGGAGTCTGAGGTGGGTCGGGGGGAAATTGGGGGGTTTCCGAG
GGGGGGTCNGAGGGGAATTGAGGGGTCTGGGGTGCTTTTGGAGGGGGCTT
TGGNGGGAAATTGGAATCTGAGGTGGGGCCGGGGGGACNTGGGGGATTTG
GGGGGTTTGAGGGGANCTGAGGGGTCTGAGGTGGTTTTGGGGGACCCCCG
GGGGGGACGGGAGGATTTNAGGGGGTCTGGGGGGGATTTGGGGGTCTGAG
GGGGGCCTGGGGGATCTGAGGTGCTGGGGGATTGGAGGGTCCGGGGGCCC
GGGGGGGANTGGGGGGTCTTGGGGGTCTCTGGGGGGGATTGGGGGGTCCG
GGGGGGATTTGGGGGGANATGGGGGATTTGGGGTGGGGCCGGGGAGATTT
GGGGGNACCCGGGGGGGTCTGGGGGGAGTGGGGGGTCTGGGGTGGGTCCC
GGGNGGATTTGGGGCGTTTTGGGGGGGGAGGTCTGGGGGGGATTTAGGGG
TCTGGGGCGCTTTGGGGAGGTTTGGCGAAACCGCCCCGAAACACCCCAAA
TCCCAGGCAACCCCCAAAACCCCCANACGCGCCCCAAAACTCCCCCCCAG
CACCCCAAAACCGCCCCAAANACCCCAAATCCCCCCAGGTGCCCCAAATC
CAAAACACCCCAAAATCCCNCAGAAACGCCCCAAAATCCCCCCAAACCAC
CCCAAAGTCCCCCAAAGCCGNCCCCAAATCCTCCTGACCCCAAAACCAGC
CCCAAACNCCAAACTCCCANAAACCGCCCCAGAAATCCCCGANCCCGCCC
CAAACCCCCCACCTGCCCCCAAACCCCCAGGTAATTTCGGCTTGGACCAA
AACCTCCCTTTTTACCCCAAATCTTTTTTTTCCTNAAATCCTCTTTTTCC
GAAAACTGCCCCAGAAATGGTCCCGNCCCTGTGCAACCCANNTGCCCCTA
CTCCCCCAGATAAGTTCAGCTTTGACCCCAAATCCTCCTTTTCATACCCC
AAATCTTNTTAGTNCTTTTTCCAACCCCAAANTCCTTCTTTGTGCCCCNC
ATCAAAATNTCCTTTTTCCAGTCCCCAAATTCCCCTTTTCACGCCCCAAA
TCCTTTCCTGTGCCNCCCAAANTCCCCTTTTCCCACCCCAAAATCTCCTT
TTTCAATCCCAAATNCCCTTTTCCCACCGAGATNCTGAGCCCTCAAATCC
TCAACTCCCNACTCTAAACCCTTTTTTCCTACCCCAAATNTCCTTTTCCA
TCCCAAAATCTCATTTTTATATCCTGATTTCNTCCCCTTTTGCCCCAAAA
TCTNCTTTTCCCNCCGCAAATTCACTTTTAGGGTTCCCCAGNNGTTTTTG
GGGTCCCGGGGGTTTTGGGGTTTTTCCCGCCCCCAGCATTGTACCCAGGG
TCTCTCTGCAGACATTGCATCTGGACCTGCCCCCACCCCAAATNAATCCC
AAACCAACCCCAAATCAATCCCAAACCAACCCCAAATAAACCCCAAATGA
CCCCTGCTGTGCCCCCCAGGGTGGAGTGGTTTTGGAG
>oenMel6-11509#LTR/ERVK
GTTGGAATTCAAAATGCAAGGAATTCTCAGAACATTGGGCCTGTAAGCCA
AAGCTTAGAANTAAACACGGTTGAGTAGAGGNAGGTTTAGCTTTAGAGTT
TAAGATATAGAAAAAATAAAGGTAGTTACAAAGGTAACAAGAAGTTTTAG
AGTGCAGCAACGTAAGTTTGTGTGTCAGAATATGATTGGCTAAGAAAGGT
CACACTGTAGTNTGAGCAATAAGACGAAATNTCTTAGTATTGGATTAGAA
ACATAAATATCTCTGTTGGCAGTGTTTTATTGGTTAATAAATCCTTAAAA
GACCTTGTAGCCATAAGTCTTGTGACTTCTAAGCCATGCTNTGANCATCT
GTAAGACAAGCTTCACCTTTCTGCCTGTAGAAGATAAGAAAATAAACCGC
ACTTTCTAAAGCAACTCAGAAGTCCCATCTCTCTGCTTCATTCGGAAAAA
AAAATCCCCACCAAAATAGTAGCATTAAAAAAAATAAGCCCAAACTTAAA
AAATATATCATAAAAGCAGTAAACCCACACTTTAAAAATATAACGTATAA
ACAATAA
>oenMel6-13903#DNA/Merlin
ATCATTATTAATTCATTTGGTATTCGTTGTAATAACANTAATCATAATGA
ATTCATTTGGTATTNATGCGGATGTCATATGTACTTCCGTAGGAGTTCCA
TTGTAATTCAGCATTAATTAGAGNACACTTAAANTAAAGTGT
>oenMel6-781#Unknown
AGGACCGGGTATGTGGACGGAGAGCGGGAAGGGGAACAGGGACCGGGAAT
GGGGACAGGGACCGGGATTGNGACCGGGGAGCGAATGAGGACCGGGACCG
GGAATTGTGGANCTGGAATGGGGACGGGGACCGCGACTAGGGGACCGAGA
CCNGGAATACGGGACAGGGACCGGGAATGGGGACGGGAATGCAGACTGGG
ACTGGGAATGGGGCCGGGAACGAGGGACTGGGACCGGGAATGGGAATGGA
GCCAGGAATGGGGACGGGGACCGGGACTACGGGACGGAGCCAGGACANGG
GACAGGGACCGGGAGCGGGACCGGGAANGGGGGCAGGGAGCGGGAATGTG
TACGGGGACTGGNNGTGGCAATGGGAATAATGGAATGGGACAGAGAATGG
GCCTGGGTGTGGGAATGGGACCAGGAAGGAGGACATGGTCCGAGAATTTG
GCACCTAGAATGGGGACAGGGACCAGGGCTACGAGACCGAAACCGNGAAG
GGAACAGGAATAAGGGACAGGGACCGGGACTACGGGATCGAGACCAAGAC
CGAGAATGGGACGGGGAGTGGGGACAGGTACTGGGAATGGGGACGGGGAC
CGGGAATGAGGACCGGGACTGGGAGCTGTAGACTTGGAATGGGGATAGGG
ACCACGACTAGGGGACCATGACCTGAAATACGGGACAGGAACTGGGAATG
GGAATGGGAACGCAGACCGGGACCGGGAATAGGGCCCGGAACGAGGGACT
GGGACCNGGAGCGGGAACGGGGATCCAGTATGGGACCGGGAANAGGGACA
GGNACAGGGAACGTGTACAGGGACCAGAAATGGCAATGGGAATAATGGAA
TGGGACTGAGATCGGGACCGTGTGTAGGAATGGAATGGGAANGAGGCAAG
GATTGGGAATTCGGCACCTAGAATGGGGAAAGGGACCTGGACTACAAGAC
TTAAAGTGGGAAGGGAACCGGGAATAAGGGACAGGGACTGGGACTACGGG
ATCGAGACCGAGACTGAGAACGGGACAGGAATGCAGGACAGGGACTGAGA
ATGGGACCGGGAATGGGACTATGGGAACAGGACAGGGAATGCGGAAGCAG
CAAGCGAGAGAGAATCTGGGATGGGGATCAGTGTTCAGCAGTGCTGCGGC
GAAACGCATCCGGGCTGGGAGCTCTGAGCTGAGCCTCCCCTGGGCTGCTG
CGGCCCAGGGCCCAAAGGCTGGAGCTGCAGCCTTGCTCCTGGGGCAAGAA
CAGNAGCCTNGTGCAGGCCCGTGGCCCCTGCACGGCCCCAGCACGAGGGA
GGGCTCTGAGGCACAGGGCTGCTGGCAGGATGGGCTGCTGTGGCCAGCTG
GGGGCCTGTGAGCAATGCCCGAAGCCTTGTGCTCTCTGCAGCTGGCCAAG
GGCAGCAGCAGGGCTGAAGGGTTCGTGTGGNACAGGCAGCCCNAGCTGCG
GAGCCCTCAGGCCCCCGGGGCAGAGGCGGCCCCCAGGAACGGCACCGGGA
ATGGGACCGGCTGTGGGGATTGGTTGTGGCTTTAGATCTTCCAAGAGCAG
AGCAGTTGCTGGTTGCTGTAAAGTTGTTTCTTGTAAAGGCACGTCAGGCT
CCAAAGGCAAAGAGCCCAAGGCTCTCCAGTCCCTGTTCAATCTCTCTGCC
ATAAAGTCCCGATGGAAGCAGGAGCAGCTCTCTGGTGCAAGAGGTCGAAG
CTGCGGCCTGGTGCAGAGTCTCCAGAGGCAGATGCTCCCTGGCCTTTCTT
CTTCTGTTCTTTTCTTCTTGTTCTTCCTCTTCTTTCATGTGGTGGTAGTG
GTGATGATGATGGTGGTGGAGGAAGAGAGAGCGACGAGA
>oenMel6-3292#LTR/ERV1
ACCTTGGGGCTCGGCCAGAATTCCTTCCCCCGTCCGGGGCGGGGGCAGCG
AGTGGAGCTGAAGGTGCCTCACCCAGTTTGGGTGATCGGCTCCCTCGGGG
GGCGGCGGCACCGGGCATGGATTGGGTACCCGAGAGTGACCAGGAGACAG
ACGAGTGACAGATCAGGGGGGCTGTGAAGAGTCGGCAGCCAGAGAGCACT
GAAAATCTCATCAGTGAGCACAGTGGGATCTTCGGGGACTAAACATGGCA
GGGCACCCATGGAGGGGAGAAAGGGAAAGCCAGGAAGGGCTCCCGGCAAA
AGGGATGATGATCCCAAAATATCTCTGAAGGGTCCCTTGGGAGCATGTTG
AGGGAGTTTGCACATTCTCCCAGAGGTAATCGAGGACACGGACACCAGGG
GGGCAATAAGGGAAGTCCAGAAGGGATTTAGACAACAGGGGATGGATGCT
GTTGGTGTGCTGGGAAGGGATTGGGTGAAGGGGAGTGTGCAGGAATACGG
TTCAGGNAAGAAGCAGCAGGAGGAATCTATGTGGTAAGAAAAAGGATGAT
GGAAAAGAGAAGGAAGAGAAAAATACTGAGGATTGGGATGTTTTTCAGCA
GGCTCTTATCCTCAGAAGTTGCCAGCTGNTCCAGATCCTTTGTATCCCCG
GTTCCCAGGACAGGCAGACAAGGAGGTCAGGATTTCAGGGGGTTTCTCTG
TGCTGGGGAGCGGCAGGAGCGGGCGCAGAGGGGCGGCACCGGGAGCACGG
GCTGGGGGCCTGTGGGGAGCTGCGGGGCCGGGCCGGGGCTGTGGGGCAGC
CGGGGCTCAGCGCCGGGCGCTGCCTGAGCCCAGCACCCCCCGGGCAGGGC
CGGCAGTGGCCCCCGGCCCCCAGGAGGCTGCGGGACGCCCCGGCCGCTGC
CCGGCCCCGTGGAGCTGCCGGCCCTGCCCGCCGGGGGGGCCGCGTTTGGA
CACTGCGGCAGGACAGGGACCGGCTCTGGGATACGGGCTGGGGAGGGCAG
GGGAGCACAAGGACCAGGAGCAAGGAACAGCTGGGAAATGTGGATTGGAC
GTGGAAGGAATCGAGATTAGCTTTTAAGCATTTTGTTTGGGTCACTGCAG
AAAGGAATGATTTTGCAGGAAGCTCAGCAGCTGTCAGAGGATGAGCACCC
CCAGGCACTGAGGGGGGCTGCAGGAGGGGCAGAAGAAGCCCCTGGAGCAG
TTGGTCAGAAAGGCACAGCAGGTGAATGCAAGAAGGGACGAGGAAAAGGC
CAAGGTGAAGGCAAAAGCCATGGCAGAGTTTCTACAGCCCCTGAGGGATG
AACCCCAGGGCCCAAGGGGGCCCCAGCACCCAGGGGTTTGGGATCAGCCA
CAAGGACCTGGCAGAGGCATTGCCCTCCTTGGCAGGGGAGAGCCTGACCC
AAACAGCCCCTGGAAAGGAATCNGGGATCCATCTGCAGGGCAGGAGGACA
CTGGAAGCAGACACAGGAACACANCAGGAGGAGCAAGTCCAGCCCTTGAT
GGACATGCATTGTTAGGGGTGTCAGAGCTCCCACTGCACCAGGGACCCAC
CGCACTGGAGCCCCTGACAACATTCAGGGTGGGTCTGGATNGAGAGGAGG
CCTTTCCTGATGGACACAGGGGCCTCTCCATTTACTCTGAATCTTAGACA
TGAGGGGGTAAAAATGNTAAAAATTTCTTTAATTCTTCAGGGGATAAGTG
GGAAAGATGAGCTGGTGTGTTTTATTCAACCACTGCTAACAGATGTGGGG
ATGGGTTTGAAATGCAGGAGTTTTTATTTGCTCCTAATTGTGATTGTAAT
TTACTGGGAAGGGATTTGATGGCTAAATTGGGAATGCAAATTAATATCGT
AAAAGGTGATANAGAGGTTAGTTCTGTTGTGCCTTTGTGTNAAATNTGTG
GCAAGGCCTATGCTGAAGTGAACCCAGAAGTGTGGGCANCTCCAGGAAAA
TAGGGAAAATTAGATATGGAGCCTCTCCAAAGTACTTTGAAGCAACCAGG
ACAAGTGGTGTCTAAAAGCAATACCCTATTCCAAGGGAGGGAAGGAAGGG
CTCACAGCCTGTTATTGAGTCCCTGCTAAAGGCAGGGCTTTTGGAGCCAA
GGATNTNTCCCTACGACGCTCCTATCCTGCCAGTCAAGAAATCGGATGGA
TGGACACAAGGATGAAAGCNGAANTTTCAAATGTTACAAAGCAGATTAAG
TGAGACTCCCGACCTGGCCCTTCCACGCAGGGAAAAAGAATTTNAATTGT
ATG
>oenMel6-10484#LINE/Penelope
TTTAAGAAAATTTCTGCATGCCTGTAACTCTGCTGCTCCTCNCTGCACTT
NGGGAAGGGCAGTNGGTTTTCTCATCCGCACNAGAAACTTTCACAACTTT
TTTCCAGCTCCGCCCTTTGCTCCACAAANACCAATTTTCNTCTAGCCGNT
TAACATAGTCGAATTAAACTTGGGCCAACTATTCCAGAAGTTTCCCTGCT
AAGCTTGAAATTTGCTGCTATTTCGCCTGAAGAAGGGCTTNTGTGCCCGA
AAGCTNGCCTGGTTTTTTTCCANCTNTATCAGCTGGTCTAATAAAAGATA
TTACCTCTCCCTACAACCTTTGCCTCTCTCTTGNGCACACTTGAAAGNAG
AAAAATGTTTACCCGCCAAAGAAAGTAACTGGCAAGTTATTTCC
>oenMel6-8928#Unknown
AAAAAATTCCCCCCAAAAAATCCCCAAAAATTACCAAAAATATCCCCCCA
AAAATCACCTGGAANCGGCGGCCAAAGGNAAGAAAAAACCCCAAAAAACT
ACCAAAAAACCCCCAAAAAATCCCCAAAAAAATCCCCAAAAAATCCCCAA
AAATTAAAAAAAAAATCCCCAAAAAAATCCCCCCAAAAATTCCCCAAAAA
TCCCCCAAAAATCCCAAAAAACCCCCCAAAAATCCCAAAAAANCCCCAAA
AAACCCCAAAAAAACCATCCCAAAAATCCCCAAAACCCCAAAAAATCCCC
CAAAAAAATCCCCCAAAAATCCCAAAAAAAAAATTCCCCCAAAAAAAATC
CCCCAAAAATTACCAAAAATATCCCCAAAAAAACCCCAAAAATCACCTGG
AGCTGGCGGCCAAAGGTGAGAAAAAACCCCAAAAAAACTCCCAAAAATAC
CCCAAAAATACTCCCCAAAAAATCCCCAAAAATTACCAAAANCCCCAAAA
AAATCCCAAAAAAAACCCCCTAGAAACACCCCAAAAAAATCCCCCAAAAT
CGCCANAACCTGGCGGCCAAAGGTGAGAAAAAAACCCAAAAAACACCCCA
AAAATATCCCCAAAAATT
>oenMel6-7989#LTR/ERVL
CATGATGGGTTGAGATAACAACAGATCTGACCAGAGCGTGTTAAAACAAA
TTTGTTATAAGCATTCGTTGTATTAGTTTAATAGTCGCTGGTCACAATGT
CGATTTATTTGCTCTCANAGTTGTGCTTGTTCTTAGAGTTGCGTTNATGT
AATACCTTACTTGCAGTATGTGTTCCCCGTTGTGCTGTTTATCACCCNTG
GGGNCTGGGCTAAGGTTATCATGTTGTACTTTGTAGCACTGGCTTATGAT
ACGATAGAATTGCTGGTCGTGAAACTAATCTGGTGTTTGTGCTCAGCATC
GCCGTCACCTCTGTACTTCGGGAGCCATCTATCGGAACTATTAATAATTA
CACCTTTTACCTTTTCTCCTCGGAGAGNCAATCCGTGGNGGAGATACCTT
CCTTCATCTCCCCCTTCTCCTCCAGGCTAATTACAATAGCGCTTGAGAAT
TTTGAATATATTTGGGATGTTGAAACCAGCGTGTTCCTATTGCTAGGNAT
CCTGAATGTGTTTCAGGTCTTGTTTANGGTTAAACAACTATTTAAGAATA
CCACCCAGTGATCTGCCCTGAGGCCGGGTAGTTATGGGTGGTAGGGGTGT
GTGGGATAGTACGGGCAAGTACCTAGGACAGTGGGCACCTCCAACGTTTT
GNAACTCCACCCCTGAACAAGTGCAGAATCCAGAAAAACCAGTAAAATAT
TTGGAAAAAGTATGCTGTCANCCTGGCAATTCCAGAGAGACACAAATCAC
TGCCAAGTGCTGGGGCCTGACCCAGGCCTATCAAGCGCTGTTCANCGCTA
TTCGGTACCCTCNAGGGGAAGAGAAGGTCTCTGGATNNGACAAAAAACGC
NGCAGNCTACTCCAACCCCTGTGACAGGCACTGCAGCTGAACCAGAGAAC
CAGTGTCAGCCCCTGTACACAAGAAGAAATGGACACAGAGTCAGCTCATT
AGTAAAGGAGGAAGCAGGGNCANCANAGGAACAGGAGGAAGAGGCGGAAA
GAGGCAACCACTCGATCCCTATCCCTGAGTGAGCTGCGGGATATGCAAAG
GATTTTATCCGTCAATCAGATGAGCACTTCACCTGGCTGCTCCGGTGNTG
GGGTGACGGAGCTAGTAGCCCGGAATTAGAGGGTAAGGAAGTCAAGCAGC
TGGGATTNCTTTCTAGNNAAAGGGGGCATTGACAAGGCGATTGGAAGAGG
AATACAAGTCCTCGGNCTCTGGAGGCGACTCCTGTCAGGCGTGAAGGAAA
GGTATCCCTTCGAGGAAGATATTGTATGTCACTCAGGCAAGTGGACCACC
ATGGAGANANGTATCCGGTACCTGAGGGAATTAGCCGTGCTAGAGGCGAT
TTATTATGACCCGAACAATGTGCAGTCACCCACAGATCCAGTGAANTCCG
ACGCACATGACCCGTGTGGCAGAGTC
>oenMel6-2448#LTR/Gypsy
CTGGGGAATGTCTCACTCCTTGAATGACCACTAAAATATTAGTGGTCATT
CAAGGAGTGAGACATTCCCCAGTGTGCAGAAGTTACTAAGGAGCACGTAA
AACACAGGACCAGGACCTTAAATTACCTTGTTGTACCTCTTCTGAGAGTA
AGAACTTTGTAAGTCATAGCATTTTGTCTTTTCAGCAGGTGACTAGGCTG
TAAACTGCAAAACTGGAGCAGATGGTTTAGCCTTTAGAATAGCATCTAAG
GAAACCTTCTGACAGGCATAGTAATTCCTACAGCTGGCTTTTCTGAACTG
AAAAAAGAGCAGTAGCAGCATGGCATTCAGTGGGTAGATCCATATCAGGA
AAGCTGCTACCCACAAATAAGCCAATTAAGCTGTCAGTAATGTTAAATTT
GTAAGTAGTGAAGTAACTAAGGGCACAGCCCAATCCATGTCTAAGGTGGG
ATAACAAGTCTGAAATATTGATCTGAAGCTTTAATTGAAGATTGGTCTGA
AGCATTAATGTGAGGATGCTGCAGTGTTGGCCTGGTCTTAAGCTCTAACT
AACATTTATCTTTCTTCCTTCAAATCCTTCCTGCCAGAGAGCATCTGTTC
TTGCTGGATTGTAATAGATCTCACATAATTAATTAAGGAGGCATTAACCT
GATGTTGTTTCCAGTGCCAATGATGGCAGGCTTAGCCCCAGTGCAGAAGC
TAAGGAATTATACTGTGTCTGAAAGGGAACATTAATTGCCTGCAAACTGT
AAATATATAATCTGAATATACAGACTTGCCCTCTCTGCCTTCCTCCCTAC
TTTCCTGAAGTACATGCTGCTGCAGCTCTGCCCTCTTTGTGGTTTCCAGG
GTGAAGCTGGATCAAAGGGAATTGATGGTATTTCATACAGTCAGCAGCCT
CTGTCATCCTTGAGGGTTACAGCTTCTGAAAAAAAATCTCCTTTTCTCTT
TCGTTAAAACACAAAGTTACAAAACACATTTAAGAAGTCAGAACCAGTGC
AACCCTGCCTTGAATAAAAGCATTTAGTAAAACCAAGTGCTTGAAACAGC
ACTGCGGACAATCACTCTGCTTCAAAAAGGTGTGCTGCAGAAGTGGTAGA
TTGGAAGAGAAATCTCTGCCCCATCTGTGTGCACTGCCTCCCACTGCAGT
AATGGACATCTCTCCTCACTGCCCCAGTTTCCTTCTATTCTGCTGGAGCT
CAATGGGCCGCAAGGCTTTGCTGCAGGAGATCCAGAAGCCTGAGGCTCAG
AGCAATAGGCTCCAGCAAAGCAAAGACCAATGATGCAGGCTCATCAACAC
CTTTCATGCTCACCCCTTGAGCCTGGTTAATGCAAGAGCAGTGGGAGCAC
TTGGCTGAAAGAAGAATCATGAAGGTTTAGGTGGTCATCTCCTTCTCAAA
GCAAATAGAAGTTACCCAAGTTCAAATTCTAGTAAAATTCCAAATAATGG
GTTTATCTGTGAGATACCCAATGCAATGAAAATAAGCAATGCCATTATTG
CTGTCCTAAATTTCCAAGAAATTAATTATGAATCCCTGTTGCAGGAGTGC
AAGAGTCTTGATAAAACCATGTCAAGTTGGTTTGCAGCATGTCAAGCTGT
GCATAAAGATATTATAATGTTTTTCAATAAAAATTCAACATAACTTCCTT
AATTTCTCTATATTTCTTGTCTTCAACTATATGTCCCAGGCATTCTGTTA
CTACGCATTTTTTGTTTTTTCAGCAAGCCTCAAATCCCCACATAGTCATA
AGGCAACCTTTGAAAGTTCAGGCTCCTGATAAAAATGGCAAATAAAATAA
AATAAAATAAAATAAAATGAAATAAAATAAAATAAAATAAAATAAAATAA
AATAAAATAAAATAAAATAAAATAAAATAAAATAATATAAAATAAAATAA
AATAAAAATGTGGGAACCAGTGGAAATTACCTGCAAGCAAACTTCTCTTC
ATTTTCACATTTCTCTGCACATTCTTCATCACTATTTGTTCTATAAACTT
GCTTCATTGGGTTGAGCAGCCAAGCCCCCTCTGTTCTCACATAGCGGTCT
AGGATGCTTCCTTGCACTAAAAGGAAAAAGAGAGAAAGGAGTGAAAATGG
GAATGATTATTTGATTTATTTTAAACTCTCATGTTAAAGTCTGTCACCTA
GCCATGTGATATCATCATTTAATTGCTGGAATGATTGGGCTAATGGTGAC
AAAATATGGGTAAATCTAAAATGCCCTCCTGGTATGGTAAAAGGTAGCAT
CACTGAAAACCCAGTGTAAGGCAGGATAGAGAAATGGCTTGAATAGTGAT
AACACAAACTTATGGTATAAAGTAATGGGAGCACAGAAGATGACCTGAGG
AGCAAAAAAAGTGAGGTGTTTCAGAAAGAAAATAGTGGCCATGCATACTT
TGGACATTTGGAGAAATGGGACTCAAGAAAGTGTGAAACAATGATGTCCA
TTGCTCTCCATTTATCCACATGGAATGAATTCAGATTTATCAGTCACCTC
CTTTCAAAGGCTCCTCCTCCTAAAAGAATCAAACCACCCCCAGTCACTGG
GGTTGTCAGATGTTTGGTTTGTCATTTTTGTAATAACCCTGTACTGAATT
TACCTAATAACCAAGGTAGAAGTTGTTGCCCTCCATCGCAATGAATTAAC
ACAAGACACTAAACTGGTAAACAAATTCACCTAACAACCTCTGGGCTACA
GCTGCCTGTCAAATATATAGGATACTAAAAAGTACAGCTATGTCTATTGG
TAAACTCAAAAATGTTCAAGAACAGTCCTCCTTGTAAGGACTTTGGCATT
TTCCTGTTACAGCTCTGTAATCTCAGAATTCCTGCACAGCACAGAGACTT
TCATGACTTCCAGCTGCAGGGTCATGGAGTTACACGAGTCCTGTGATTTT
TAGTTTCTTTATCAGTGGAGCATATGACTCTTCTGACGAATGTTTGGCTC
TGGGATTTAGTTGTTCTGCAGGATTTCAACCCCAGACAGACACCCTGGCC
CCTGGTCACTGCAGGACATCTCAGTCCTGCTCTGTTTTTGTGCCTGGCCT
TACACAATTGCTGAAAAAAAGGCAGACAGGGGATGAACCAGACCATGACT
GGAATCTCAGCAATAACAGCCATGCTGCAGAGAGGGACTTCCTCACTTTC
TCCGACCCGTCTGTCTCAGCCATGGCCCAGTGCCAGCAGGAGGGACAAAA
AGCCTCATTGTCCCACTCAGACCCACAGTGAGCAGGGGCTCCACTGGGCT
GCTCAGTGATGTATTCCCGGCTGAGAGAGGCAACAGCTCCTCCCTGTCCT
GAGTAACACCCTTTAGTGTGGAGCAGGCTCACATGTGTCCTGCTGTTAAA
TTCCTTCACCTGAGAGACAGCTCAGCCTGCAATTGGGTATTTTCCTACAG
ATAATTTTGCATCTACATATTGAAGCTGGTAAAACAGGGATAGAAGTCAA
ATTATGCTTCTTCTCATACAATTGCAAAAGCATAGAAGTTACTGCAGGGG
TTTTTCTGCATTTAGAGAAGGGAAGAGTTTGTCCCTAAGGGTTGGCAGTT
ACTTTAACAGTGTGCAGGGAAGGAAAGGATAGCTGCTGGAAAACAAAAGA
ATAAGTGAAAAATAGTCTAATGAAATTTCCGCTAGTTATTTCAAAACAAA
AACACTGAGAAGAAATGTTTTGAGACAAAACATTAAACTAGGTTAAGACA
ATATCATAGTGATGCTGCAATGCTCTCCACAAGGAAAAGAAAAACAAGTA
AAGAATTCCTATTATGGTACAGCTTCCATGCAAACTTAATTCTGTTCTGT
TTTGACATTTTGCAATAATATTGTTATTATTATTGCAACATTTGATTTTA
AAAATATTGACAGGGTCATAATTGATTTGGGTCATAAAAATATTTTTCCC
CTTTTGTGTTATATTTACATGGAAGGCATCATACTTTAAGAAAATAAAAA
GGAAAATATGCAATCTGAATAAAAAACAGTAAATTTTCATGTTACCATTT
TCCCTGTATCTGTGGTTTTTTACAGTCTCAGGAATATGTATTATTATCTT
ATTCAGAAATGCAAATATTTACCACTATTTGAGAAAGGATTTGCAAACAA
AAGTACAGTATCTCAGATAAAAGCCCAAATTGTATATTTTTCTCCCTCAT
ATAAAATTCCCACTTCATTAAGAAAGGAATTTAATTTTACTAAGGTTGTT
CTTTTGCAAAAACAAAGATTAGAAACTAGAATTTAAACAAAGATAAAAAT
TTTAGCATTAAATAACAGATTTTCTTTTTATGCTGGGGCATGTCTCTAAT
ATTTCCAGCTAAAATCTACCCAAATATTTTCTTAACTGTTACCTCTTCTT
GTGTTTTAAAACAGCACATGTAAAATGCTTGTTTATTTCATTGCACCTTT
ATACATGCATTAGCACATTGTATTACACATGTATTTTTTACTGCAATCAC
AACATACTGAGTGGTTATATAGGTGCCTGCAAGAAGCTGCATGGTCTGAA
TCTCACAGTTCATTGCAGTTTAAGGTTTTCAGGACAGAGAATATTCATAT
GCACGAAACCCATAAAAATATATCTAAAGAGAACAATTCAGTTCTTTTGT
GTTCCCAAACATTTTTATTGTCTTCCACAAAGTTATCTTTTCATACCAAA
AATATTGCAGAAAATAACAGTGATCAGATTTGGTCTCCCTGTCACATGGA
ATGATAAATTCACTGTTAAGAACATGGTTATGAAAAAGAGTGAAACTGCA
GTATGTAGAGCAAGCTTTCCTTTCGTTTGTGATTCTGTTTTGCACAAGCA
TTAACAGACTTTAAAGCAATCAGAATAAGGATCACAGTAGCTGGTAATAA
CATAGAAAAAATCCCAACCCAAACCTAAGATAATAAACCAGAAACCAGAG
GGAGCCATGCCTTTGTACAAGCCTTTGACAGGCTGCTTCCCAAGGGTGTC
CCTGCCTCTGGCCATGGAAAAAGTTTGCTGGGAGCCATTAGTTGCCCATG
CAGACACCAAGGCTGCTCCTTTTTTGGATTCTCTAATGAACACAGCCCTG
GAGAAATGACAACTCTCACTCTTCAGCAGCAGCTCTTGCTGGCCAGCAAG
CCCCAAATCCAGCATTGTCCAGGGAAGTTGTGACACAGGGATTTGGGGAC
CTACCTTCCTCACATGGAGCTCACAAGAGTCTGGCCCCAGTCTCACCCAG
GCAAGCAGAAGGCAAAGCACTCTTACCTGAGCTGAGAAAGACCAGAAGGA
GAAGGGCAGCTTTGCTAATCCCCATTTTGGGCCAGCTTGGCGGGTGCTGG
AAGTTGTGTGTGTCGGTGCTCGAAGTTTTATTGACTCGCACCGGAGTGAG
GCAGCATCAAACAAACGAGGCAGGAGGATTAAGTTAATCATTCTCCCATG
CTGCTCCCCCCTTGCCATGGTGTGGCCGTTCAAACAACCTTGAATTGGAT
GGATTACCAAATCAGATTCAATCGTTTCTACTGGATGCTGTTAAATGCAA
AGGCACTTTCTTGTTTTGCAGGATGTGTTTTGTTCTCAAATGGTTAGGTC
TTTCTCTGCTAGGGAAAAGACAGGAATAATGTTGCTGAAAAGCATGGAAA
ATCATGTGTCCGGGCAGGATCTGAATTTCTCTTGACACTGGAGTCCCAGT
AGTAAATTCAGCCATGCATACCTTCACTGATTTATAAGGAGCAACTTCTA
TTTAATCTCATAGTAAGCATGATTATAAGATTCTGATATTATTAGCACTG
TAAAATAGTTTTATTTTACTTATTTATTAAATAATTCCTTTTCTGCTGTC
TCCTTGACCTAAAGTTTTCTCTTTTTTCTTCTATCTGGGACTACGACTTA
ATTTTAATTTCATTTTAACTTAAGATTTAAGAGGATAAACATTAGGTTTA
AGTGTTCTTTAATTTAGTGTTCTTCCTTAGCAGACATCTAACTCACACTG
CATGCACAAACTCATTCAGTGAGGGTGTCAGACTTTGTTCATCTGTGTGT
TATCCTGATTTCAACATCAGATCACTTTGCATTTCCCAAGCAGCCTTTAT
CTTGGAAAAGTTGCACTGCAGCACCATTTCATGGCTTCTCTTGCCTGTTA
ACTCTCTGGTGTTGCTTCCAAACAACTTATTGAACCAAACGTGCTGGCGG
CTCACTGGAGGCGGGAGTAGGATGAATACTGGATGGGGAGAACGGACTTG
AATGGACACTGCTGCATCATGCAATTCAATCTTCTGCAATTGAAGCCAAA
AGTTTACAGAATCATGAGTTGCCTCTAAAAATGAATGAGGCTGACCACTT
GTACATCATCCTGCCTGCTTTAAGTAGAAGTTACACTGTACTGAGGGCTT
GGGATAAATCTAGGAGTGCAGGAGTAAATATGTGGGAGAGGCATTTTAGC
ATGAGAATCAGATTAGCTTATATTTTATTGATTATCTGAAAAATTTAAAG
CTGATCCTGCTTGTGGTCCTATACTATTTTTTCTCCTGTAGGGTAGTATA
ATACCATGTTATTTGGTTATTTCCTGTGCTTGAATCTGTTTTAATGCAAC
TTGTGAACAACAGCAAAGCATGAGGTATCTGTAGGGGCTCAGTTTACCAC
TGATGTTAGTCCAGGGAAACAAAGCAGAAGGGCCTAGAAGAGGAGCTGAT
TGGATCTGGACTCAGCTCAGGGAAACATTTGAAAGGAGACAGGGAGAATG
GGTTGGACATAATGCAATCATGTGTGGGATCAGGTTTATCAGGTTTTAGG
AACAGTTACTCATTGGGAAAGAAGTGTAAAACAAAGGACCAGAACTCCAA
GTAGGTGTTACTAGCAAGTAAGCTTTTGAGAGCTATTCAAGTTGGGTTAG
CTCCATGTTTTTAACAATAACCTAATTTTCAATTCTAGCTCCAGATCCTG
GTTTCTGTCTCTCCTTCTTTACATCCCCTGACTCCCCAACTACATCTGCT
CATCAATCCTTGTGCTTCCATCCCATCAGATATTATCAGATAGTGAATGG
GTCTTTTCCTTACTCCAATGCAAAATTTGTTTTCTGCTCAGCCTTGCCCT
CTCCAGCATCTTTGGCACCTTCCCCATTTTTCTGTATCCCCCATTTCCAC
TGAGGTAGTCATTGGCTTACTGTGTTATGGTGCACATCTGGTGGTAAAAG
TCTAAGAAAAAAAGATGCATAAGTGGGTGAGTGCAGCTGCTTCTGCTGCA
TGGAGAGGTTTGAAAGGCTGTGAGTCTTAACTGAGTTTGTAAAACTCATC
AATAAACACTAAGTATTAGAGATTTTAATCGGATTAGCTTTTTTTAGTTT
TCAAAATTAAAGAAGCTAATTGTGGTAGCCAAAGGTTTAACAGGATAGTT
TAGGAAAATTTGCATGCATCAGGTAAGTAAACTCTTTTGCAAGCTTTCCT
CATCTTAAAAGTCTACATATACTTCTTCACAATCTATACTCCTTCCTTAT
AGTCTAGAGTTGTTGCCACTTTTAGGCTTGGATCTGGTCCTTCTCTCAAC
CTCATTGTCTCAAATCTGTTTAAAATGCACCTACATTGGTGTCAATGCTC
TGAAGAAAGCAAAGAACACTCATTGCCATTCCATTCAAAGATGGCAATGC
ACATTTGAATAAATCTTATTAATCTCTGTCTTAATGGATATGATCCTGGA
AAACTGGATTTGAGAATATTGTCAGCAATTGTGCTTGGTACAAGAACAGT
CATTCTGTAAGTTTTCCACGGGAAAATGACAAAACAGAGGTGTCTTTTAT
CTGTCACACTGGCACTCCTCACTGTTGTCTTGTGACAAGGATGTGACCTG
TCAAGGCATTATATTTGAGAAGATCCCTTGTAAACTGTTGATTTAACCTT
TTATGCCTTTCCTTCTTTCCTCTTTCCCCTCAAGGATGCACACAGTATCT
AAATCTCTCCCCAGGTCTGGTCTTGTGGTGTTTGTTCTCATTTATTTGAT
CACTGTGAGGCCCACCCATAGGTGGAAGTTTATCAGATCTTATTTCAGAG
TCAGGGTACATTGGTTAGCACAGTGGTTAAAATATAAACAACAGTAGGAG
GTTTTTTAAATAGAAGTTGACCCTTGAAATTGGGTTTACTGTAAGTTCAG
AAAAAGTTCCCCACAAAAGAAATTGCAAACAATCTCAGAACACAGAGCAC
AATTTTTCGAATAAATTTTCTTAAACATAAATTCTCTAAATTTCAGAATC
AGGAAACATCAGAAAACAGACACTGAGATTATCACGTACTTGCTAAGAGG
GAAGAATCAAAGGAAAGATTTTGTTATCTTTAAATATCTTCAAAGGAAGG
GAACATTTCAAAAGGCATCTCTAAGGAATTGCTCATCCACAAGACTGGGA
TAAGCATGGAAAAAAAAAAAAGGAGTTAATGTAATTGCCCCAAAGAGTCT
CCATGATATAGAGCCATGAGCAGAGGGAAATAAGGAAGCTATTTTTATTT
TTCTTTTCAAACACCACCAGAAAAAGTAACAAAATAAGATGTACATAGCC
CTGATGCACAGAGGCAGAGGGAACTTTGGGCAGCAGCCCCAGATGGATAA
TGTGGATGGCTTCTAAGAGCAGATGCTGCTGAATGTAAGGTAGGGAGGAG
TTCGGGAGGAGGAAAGGTAGCCAAGTTAAAAATAAATTCTGTCCTTGCTC
TGCACATGAAAGAACAGAGGGCAGTAGATCTGGTAGATAAACTCATCTCT
GTGATTTCTGACCACAGATGCTAATCTGGATCCAAGGTAAGGAAAATTAA
AATAAGGAGATACAGAGAGGATTTTTTTTTCAGTAGTGAAAGCTTCTGTG
TCTAAAATGTTCATATGTTCTGGCTGCTGCCAAATGTAAGAAACCAGCAG
AATAAAGTCAGGAAAATGGGAAGCCAGAAGTGAGCAAACTGAGCGTCACC
TTTCTAGCAGAGACATCTAAAGAATTAATTAGTGAGGTTTCTGCATTGCT
GAAAAAGTATCTGGAAATACAAAGACTGTGTAATTGCCTTTAACAGAGGT
GTGGAGAGCATTAAAACCATAGAGAATCTGACAGCCAGCACGTAGCACAC
ATTGTGCTACAAGACTTTGCACACGAGGGACAATGGCATCATGTTGCTGA
TAGACAAGAAGGTAAAATCATTCTTCATTTCCTAGGCAGGGAACATCAGA
GAAACCACAGCTAAGGTAAAGAATTGTGGACAGCAGAGACTGTGCAGCTT
TGAGTCCTGCTTGACTATTCCAGCATGTAACATCCAGCACTAGCAGTGCT
TTGGGAAGTGGCTCAGCAAAACTGCTGTGGTGATCTCTGCAGCCTGCTCC
ACATGTGTGTCAGGGAGAGCACATGTCCTGCACCCAAACTTGTCCTTCTT
GATTTTGCTATTCTCCTGCTGTACTGCTGCAACCACCCTGCCTAAAGAAC
TACCCACTCTTTACACGTGGGGCTGCAAAACACAGAGAAGCAGCACGTAA
AAGGGCCTGAAATGCAACCCATATGTCTGATTCTCTTTTTAGTTCTGTTC
TTCTTGAAAGAGTCTGTAGGAAAGTGAGAATCTTTTTTGCATTCAGACTC
CTCAAAGACCGGCGCACTCCAGGTCATTGCTGCACTTCTTTGTTCAGCAG
GAGAGCAGTTCCTGTCTCTGCTGTTCCGAGTCACGGGACTCAGCTGTGAG
CTGTGCTCTGGAGCCCATGCAGAGGGAGGGCTGTTGAACTCTTATCACTC
TTTCCTCTGACACCTAATGGTGCAACTTAACCCTGTGACCACTCTTTTCA
AAATGTTTAGAGTTACTGGGGAGTCCTTGGATGAGGGTAAGGGCAATTTG
GCAGCAGAATGTGGAAGAGAAAATGAAGAAAAGCAGCATAATGATTATTC
CACTTCTGGTTAGAAAAGCTGAGCAGAGACTGTGTGGAGAAATTTGGATG
CAATTTTACCCAATAGTTCTGTCTAAGTGCTTCCAAAGACCCCTACAGAT
GCCTGCTATCTGTAAGGTGCTGTTCTGTTCTTTTTCTACACACTTAGGCA
GTTTTGTACAATGATCAGTGCTGCATTGTTTGCTAACTGATGGTTCTAAC
TAGTGATGAAATCAACTGTCTAGAAATCTCACTGAAATAAGATGAATGTT
TACAGTTCCTTACTTCTATGACAGTTTCAGAAAAAAGGGACAAGCCACCT
CCATCTTCTACACAAAAGTGCATATTGAAATTTCCAAGTGCATTTTCTGC
TTGTCACTTACATGTAGGTTCATTTCCATGCTTATTCTTGGCTCATTGAC
TTGCATAAAGGAGGGATGTTCTAATCAGTTTAATCTTATTGAAAATACAT
GTTAAAAGGGTAAAGGCAGAAAATTATGTTAATATTCCATTCAGGGTTGT
TTGGAATGGGATCAGTTCAAGACATTTGAGTTAGAGAGATTTTCAACAAT
ATGTCAGCAAGGTGAGAATATTACCTTCAGGTTTAGTTTAACATTTTGAC
AAATTGCATTTGTGTGTGGGCATGTTTATGTGTGTGTGTTTATGTGTGTG
AATACAACCTACTATAACATCTTTGTTTACAAATATTTAATAAAAGTGTT
AAGGACAATTCCAGTTTAATAGATGTTGTATAAAAATCCTCTATTTTAAA
ATCATTTTTATGTCTCTATGCAAAATGACCTTGTCATTGTATTCCACAGC
TTGCATTTGCTGAAGACAACATTGAAAAAATTGTTGGTTCTTTTTTTCCT
GACTCTCATGTAAACTCCCAAGTTCAGATCAGGAAATTTTGCTGTAGAAA
TCATGGAAAAGTTGATGATCAGCTTTATAATTTGCTCCTACTATATTTTA
ATTCAAAGTAAATTTCTGAAAGATATGCCATTTACATGTGCTGTGTGTCC
CAAAGTCTGTAGCATACCATGTTCTATTTTTGGCATAGAAAGTGCAGAAA
CATGAGTAATCACAAACAGTGGGGTGGAAGGCAGATGAAAGTAGGGTAAA
AAATTAAACAGATGATGCTGTCAGCAACTGGAATTATCTTAATAACTTTT
TCCAAACTTGTTTTTCAACCTCTGCAACACCTTCCCTAGTTACAAGCCAC
CCATTAGTCTTCTGACATCTTGTGCAAGATAACTTCTTGGAAAAAAAAGC
TTTTATAGCACTCAGAAATGTTCAGAGTGTTGCAGTTGTCTACAGGGTTA
AGATACAGGAAAACAAAAAAAATCCAGTGGTACTACATTTGAAAATGTGA
CAGAATAAGGACATAGAGATCACCAAAGCAGACCCAGACAGATGAAATGA
GGAGGATGGTACTTGTGCACCAAGGATGCAGAGCCCCATCCAGTGACAAA
GTGCTGGTGTTATCATCAGAATCAGGGCCCAAGTTCCTACATTCTATGAC
AATATATTGTCATAGTCCTAGTAGTAATGACACAGTCCTAGTATTCAACT
CTAAATATGAAAAAAATATTTATTATTTAGGCACATCAAAGACTGGAAAA
TGCAGGAAATCTTGCCAGAAGTATCACCTGAATAGGTGCTTGAATTAGGA
TGGATGCTAGAGAACAGATAAAACTGCAACTGTTTTCCCAGCTGGAGAAA
ATAATGCAAGATATCCAGACTGTATTCTCACAAAAACCACAAAAAATATC
CCAAATCACAAACTAACACATAGAAAAGACTCAAATGACTGTGGAATCAA
GTGATCCACAGAATATTGCAAAGTCTTTCACTCCTGACAGTCTTTCACTC
CTGAGAATATCCTGTAGCAAGAGGATGGTCTGTAAATGAGTCACAGATTT
CTGGGCAAGAAACCTGAATTCTAAATGTGATGCTTAATAACATGAAAATT
GTTATTCTGTCTGTACTGCTGTGATCTGTGCCTTACAGGCAGACTGTGCA
AAGCCTCTGCAGGCAACAGCATCACCTGGGGGGCAGATCCCCAGCAGGCA
CAGTTCACATCTGCTAGCAAAATGCAGTATCAAATACCAGAAATTTCCAT
TAGTGCCCACAGGACCTGTAGAATGCCTCACAGGAATCAAAAGAAACAGG
AACAATTTTTGGGTCTGGCCAATTATTACAGAGAATTGGTGCCAATGTTT
TTTTAAAGGACAGCACTACTGGCAGAACTTTCAAAGCCAGCAGTGCATGG
GGGATAGAAAGCAAGTGCCAGATGGCAGCAAGCCTTTAATGTGCTCTGGG
AAATGTTGTGCTCAACATGCTCTGAAAGCATCCAAACCTACTGAGCAAGA
AGCTCAAGAAAAGCCTTTGGGGCTGTAGTACAACAGGAGAACTAGGGAGA
GACACACTGAGTACTATACCTGAGAAAGGGGAGCTGGTGATGAGTTCCCA
TTTCAGGTTTTTCTCTGGCCTTGTCCCACTGGTAGATTAGTGAGATAACA
GCAGGCTGCAGAAGTGGCTGTGGGCTGAAACACAGTCCCTGTAAAAGCCT
GTTCAGGTGATCACACAGGAAAAAGTGGATTTCCATTCACCACCATTTCC
AGCACCCCTGGTGAGAGTACAGGGGTCTGTGCTAGTGTGAGAAACTCCAC
ACTAAGGGCCACATGGTTTGAAAAGGTAGCCTGGTCTATAGCTGTAGTGG
GGATACACATCTAAGGGCAGACTGAATGGGAGAGCAGGAGCTTGGAGACT
GGAACAATATTCAGGACTTGGAAGAAACACAAAAAAAATGTGCTGTCAAG
AAAGACTGGTATAGAAAAGCCATTCAAACAAAAGAAATTGATGAATGGGT
CAGAATGGAAGCCATAAATCATTGATGAAGATTATTAAGGGAAAAGCAGA
GAATCTGCAAATATATATATATATATTTTTTTTTTTTTAGCTGTAACCTT
TTTACAACTCCCAAAGTTAATTTTTGCAGAGTCTGATCTCCCCAGGGTTC
TTAATAGCAACAATAAAAAATCTAAATACTAGATACAGATTTATAATGTA
CTTTATATCAGGTTTCAACAGGAAGACAAAAAATATAAATATCCTTCTTC
AGATTTAGAGGTCCATTTCTATTGGTAAGGTGTACATTTCTTTGTATGTA
GGCCACTTCTGTTTAGAAGTGGTATGTTTTTTAATGATACACAGAAAACT
AGAACAACAGCTAAAAATTCTGGAATTAGCCTTGGCTAGAGACTGGGAGG
CTAGGGGTCAGGTGTGTTTCTGTTGATTTTTGTTGCTGTTGGAACATGCC
CCACTCAATTTCCTTTGGTCACTACAGTACTGATTGAAGGACTAACCCAG
ATTTCCTGATTCCTGATTCAGTGGCAGATCTTTTCCATTGCTCTGGTCAG
CATCCAGGCCCAATTCCATAGCTCTGGGAGGCCTGACCAACCTGTGGGTG
CTAATTTCTCCATTTCCCTGCAGAAGAGTTAGCCTAGATTCATATTGATT
TGAATTCTTTCTAACATAAGGTGTTTTCCAGACAAGCAAGGCTTTGTAAA
ACCAAAGCTGAATTTTCCCAAAATCTAGTTTATTTAGATGTGGGATTCTG
TCTCTGGTCCCCCTCCCATGCTGATTTTGTGACCAAGCTGCACAACATAG
CAGGACTCTCTATCCCATTGCTTAAATGAAAAAAGGGTATGTTGGTTTTC
CCACCCAAACAGACTTCAGAAGAAATCTAGCTGGTATCATTTTTTTTGGC
TTCCTATCTTTCACTAGAAGATAGGAAGTAGCTGCCACCATGTGGCAAGC
TGAACCAAAAAATCCCAACAGAAAAAAGCAAAACAAAAATTGCAAGGTAA
AAGAGAAGAAAAAGATGAGAGAAAAGACACTGTCTGTGCTAGAGAAAAGT
GCTTCTTAATAATGCTGATGATTTTCACTAATATTAGAGTGACTATTCTT
ATATTTATTTTCATAAAATCAATTTTGTCACTAAATTACACAAGAAGGGG
AAGAAAGTATAGCAACCTCTGGAAGCTTTATGGAACCTCTGGAACCTCTG
GAAACCCAGAGACAGCAACAGGCTTTGTTCTTTTTTTTTTTCTTTTCATA
TTCTATGGATGCACATACAAAGACTCCTTGGCTTTGTTTTACAGGGGGAA
TATTAAAAAGGTGGGTCTGGTAAGTGGGGTGGGAAGGGCATCCCTTGGAT
ATAGCTCAGCAAAGCCAAGTGTGCTTGTGGGAATTGGGGCTGAATGAGGA
CAGAAACCAGCATCACTGCTGGAAGCTGCAGGGATGAGGAACTGCCTCCT
GCTGCAGCAAAAGCCAGTCAAAGCTGGGTGTTCTCAGCCCTCAGCACAGC
TGGAGTGAGAGCTGGGCAGCAGGACACCACAGGGTTGATTTTTAATGCTG
GACTGTGAACAAGATTTGTGAACACCATATCTGAAATAGAATATTAAGGT
ATTCCTTCCTCAAGTGAAAAAATGGCCACTTTGCTGACAATAGTGATTCT
TACTCAACAAGTCAGTGGAAACAAGGAAAGAAGTGAACCTTAATAAAATA
CCGAAGAATAAAATATCCCAGAGAGATAAACAATAATGTTTTAAAAGATA
GGCTTGAAGACTTTGAAAAAAAGTTATAAGAACATGTCAAAGGACTACAA
ACTAAAGTCTTCAAACTGACTTGATTAAAAAAACCAACCCTTTAGAAGTA
ACAAAATCCACTGAACCACATCAACAATTACATTATGAAACAAAACAAGT
ACATTTCAAAGAATAAATACATTTCTGAAAAAAAATGTTGTGTGAATTAG
TCTACAAATAAAATCTATTAACCACAGGATACAATAGGGATATTCAGGAG
ATCCGTTACTCTTTATTAAAGTTTATTGTATAGCTAATAAGCAGCACAAA
AGGAAAATAATTTAATTAAAATATATCCAAAGATGCACTTAAAGTACAAG
GGGAACAACTGTATTTTGTAAAGTTAAAAAGCAACAATGCTGCACTTAGT
TACAGACAAATTCTAGCTCCGATATCCAACGCTTCCAAAACACTTCACAA
AAATTAGACTTAGCGACATGTGCTGTTACACTGCCATCCCGTGGCAAAGC
ACCCGAAGTTTTCTGAGAACACATGCATTTTCCAAATGATAACCTGCTTT
TAAAAAGACTTAGAATTCTCGTCCTGAGGACAGGAAAACATCAGTAGAGA
TTTAGCCATACCTCAGATGTTGCTCAAGAAACATTAGTACTGAAAACACA
ATAAAATTTTTCGCCAGAGGGTTCATGACCTCATTGTCTGGACACACAAT
TTGAACTTCTGAAACCCAGTTTTCTGGCAATGAAATAAAATGTGTCTACC
TTCTTATCCTCATGTTGCAAAATAAATAGACATTCTAGTAAGTAGAACAT
ATTGAAATACGAGGGATAGTTCATGTGATTCTCCTAATAACTTCAGCCCA
TTTAAAATGAAAAATAAAATTACTTATTAAAAAAATTAGGAGTTTTACAT
TCCCTGTTAATACCAGATCCCTAGGATTGTGTCCCTTCACAATTCCAGCC
TTGCTCCAAGTCTCTGCATTAATATGATGACTAAGCCTTGATTTCCTTAA
AACATTTTAAAGTTCTAAACTGAAAGTATTTTCAAGAAAGAAAGAAAGAG
AAACTAAGTTTCTTTAAATTTTTTGCTGAATTTTAATGTAACATTTTTTC
CTTTTGGCTTACAAGTAAAAACTGTAGTAGACTGTGAAAAAAATATGTAT
TACAGAATTTTAGTTTTGGGAGAACAGCCACCCACAAGAAAAGGAGAATA
CAAAACAAAAATAAAACCCGTGTTCATAATTAGTCTTGTACCTACCCTGG
AGAAAACCTTGAGATGGTAAATGTGGCTCAACAAAGTCAATGAGGAAAAA
GAACATTTTTAAACTCTCTCCTGAGAAAGGACAGCTTACTTGCCCACATG
AACTAAGGGCACCCACTTCAGGACTAGGAGGCAAGTCAAGGACTGAACTA
ACAGGGAAATCTTTTCAGTTCAAAGACTTTCAAATCTCTGAGAAGCAGCC
ACAGAAATTTAGATTGCCAAATAAACATATACAGGCATTTCTACTGCCAA
TATCACATATTTGGGGTAGACCAGCTTTTCAGCATAGTCTTTGTGACTTG
CTTCCAAAGCACTAGAAATTTAGCACGCAAGATGCAGTAATCTCAGGATG
CAGAACATCTTGCACAATTGTTCTCTAATTATTAAAGAAATTGATTACTG
ATTATCAATATAATATAAATAGAATATGAATATGAATATGAATATACTAA
AATATAAAAATATCT
>oenMel6-5164#LINE/CR1
ACTTTTTTTTTTTTNTTGCACAATGCNTAATTAGCCTGTNGAACTCNCTG
CNGCAGGNTGTCACCCACTGNGCCCANGGNCTTAGTGGAAAAAAAAAAAA
AAAGANNNAAAAAGGAAGCTATACACTTATNTGGATAATGAGAGCNTTCA
GGGTTACATTAGATAGGATAAAAATGTTTGGGAGGGATATAAACCCTCAT
GCTTCAGGGCATAAGCCAANCGCTAACTGCCTGGGGTTAGGAAGAAACTT
CCCCTATGGGCAGATTATTCCATAATTGTCCATTGTGGGNTTTCTTTCTT
CCTCTGAAGCATCTGGTNCTGGCCGCTCACTGTAGAGACAGAGCACGGAT
GGATCACTGATCTGATCCAGTGTGGAATTTCCATTTCCCAGACTG
>oenMel6-48695#Unknown
AAATAAACACAGAAGAGCAAAGAAAACTAAGTCTCTGTGAATAAAACGGA
TNGAACCCAGAAAGGTTCGAAATATG
>oenMel6-2171#LINE/CR1
ATGTGAGAGGTTAGTNACTAGAAGAGCCCTGAGGACATAAAGGATAATTA
AGAATCTGCGANGAGCTGCCTGAGGAGGTTGGAGAATCTCCTGTATTGAA
GGTTTTAAGAACAGGTTAGACAAACATCTGTCGGGAATGATNTAGGCGTA
GCTGATCCTGCCTTGGGGCAGNGGGATGGGCTAGATGACCTCTCGAGGTC
CCTTCACTTTTC
>oenMel6-6450#LTR/ERV1
CTCAAGATTTGAGCCCCTCAAGATTTGAACCAAACTTTGCAATTTNTTTT
TTAGTTGTTAATCAGTAGCTATAGCCGGACAGTTATGATTAAGCAATTGC
ATTGTGAACGTTGTATGCTTGGCTAATCTTTTGTTTTAAGGAAAAGGGAA
GACAATCCCAAGATGAATGGGCTGTCTGGACGAGAGCCACCAGGAGTGAA
GTCAGCAGAACTGAGCAGTAACTGGGGGAAAGGTAATTCCGGCAGTGGGA
GATCGCGACCACCGACTCATTGACCACCTACTCAAAACGGACCCCAGACT
CAAATGGAGGGAAGAACTGCGCCTGCGGACTAATTAGCGTGAGAAGCGAG
AGATATAACTAGCAAATAGGGGTTTGAGTACTAATTAATAAAAAGTTNTG
TAATTTGCAACCAACGAATGCTGATGCCTTTGTTTGTTAAATGAATAGTT
TTGATGATCGGGGAGCCAGCCTTTTGTGGGTTACCACCAGCTCCCTACTT
TGCGCAAACTAGAATAAAAAACAGAAATACCTCGCCTCGGTGTGTGAATT
GGCGCTGCGCACTGGGGAACA
>oenMel6-4769#Unknown
TTTCTTTNCATTTCTCTCTGTCCTTCCNAAACACCCAGNANCGGGGTAAA
AATAAAGNCGTTGAACAANGACGTGCTTGGGGACATGGGGGGATCTTCCA
GGGGATGTGGGGGATGCTNNGTTCCAGGGATTTGACAGGTCCTGGGAGGG
ACCTGGGGGTTGCTCAGGGCTTTGGGCNCCCCAGNNCCAGCGGCTCCGGC
TGCAATGGGAAACCCTGGCGGAGGTTCTGGGGCAGCTGATNAAGGACCGC
CTGCCCTGACCCGTCCCGATGTCCCCCCGTCCTGGCTCCCGCTGTCCCCT
GTCCGGGATCCCTCTCTCCCGGCTGTCATCCCCTTGGCCCCCGGCCCATT
CTCATTCCTATTCCCAGTCCCGTTCCCGTCCCAGTCCAATTCCCATTCCC
GGTCCCCTTCCCNNTCCCCGTCCCGTATTCTCTGCCCGGTTGCCGTTCCC
ATATTCCCAGTCCCATATTCCCCGTCCTGTTCCCTTTCCGTATTCCCAGT
CCCACTCCCATTCCCATTCCCGATCCCATTCCCGTATTCCNATTCCCGTT
CCCTGTCCCATCTTCTAAATCCCCATCCCATATTCTCTCCCCAATTNCTA
TTTCCATATTCCCTGTCCCATTCCCGTTCCCGTTCCTGTTCCTGAGGGCC
GCCTCTGCCACAGGGGCCCTGGGGGCTCCACAGCCCTGGGGCTGGCCTGC
GCCACACGAACCCGGGTTCATGCCCTGNTGCTGCCCANGGCCGGCTGCAG
ACTGAGCGGAGCACANGGCTTCGGGCGTTGCTCAGCAGGCCCTCAGCCGG
CCACAGCAGCCCGTTCCCCTCGCCATTCCATTCTCACTCTCATTCTCCAT
TCACATTACCGGTCCCCATTCCCGGTCCCTGTCCCCTCTCACCGGACGCC
GCCGCCATCGCTCCGTTCCCCTCACGGCGCTCACGTGACCGCGGCAACCC
CGCGCCGCTCCCGCCCACCAATCCCAGCGCGCGGTCGCTCCCTGATTTGC
ATAACCACGCCCTCTGGCCCCGCCCACCGCCAGCTGCGCTCATGGCCGGG
CGCTCTTTGCTCCCAGTTCCCTCCCAGCGCTCCCAGTAAGAGCGGCACTG
GCAGGGAAAGCGCTCCCAGTTCCTGCCCGGGGCTCTCAGCATCGCTGCCG
CTGCTCTCCGTGTCATTCCCAGCGCTCCCAGTATCACTCGCAGCGCCGCG
CGGGTCGCAGCCGCTCCGACACCGCCCGGGCCAGAGCGCGGCTGCTTTTG
GGTGTCGGCACCTGCCCGGGCCGGG
>oenMel6-29124#Unknown
CCCCGGGGCCTCTCTCAAACATCCCTTGCCCGCCTCGGGCTCCTGCCGGG
GCTCCACGTGGGTCCCGGCTCCATCCCGGACTCACCCCCAGCTCCCACCG
CCCTCAGCTCCCGCTCACCCCGAGCTCCCGGCGGTTCAGGGCAGCAGCGG
TTCCTTGGCCCGATGCCCGGGCCGGGCCCAGCGCGGGAGCCGCTCCTCAG
GCGAGGTTTCCGAGAAATGGCGGAGCTCGGGGAAAGGGAGGGGAGNCCGT
GCCGTGTGCAGAGCCCGCCCCTCGCTGCGATTGGCTGATTCTGCCGTCAC
TCCTCGNTCTCGCGCGCTGATTGGGCAGAGCGGGGACAAGCCCGGCCCCG
GGGCCAAAGGCGCCATTGTCGGAGCGTCTGTGCGGGCCCGGGAGCGGCGG
CAGCGGCCGGAGCCCGGTGAGGCGGCGGCGGAGCTCGGAGGCGGCCCCAG
CGCAGGTGGGAGCCGCGCTCGGTTCTGCGGGGGCTCGGGGCTCGCTGCGG
GCGGAGGGGGCGGCAGGGGGCTCTGGCGGGTTCGTTGTGCCGTGCCCGGC
CCGTGTTCCCCCTGGGCTGAGGGCGCTGCGGGAGCGGCTGCCCGCGGTCT
CCTTCCCGCTGGGGCCTCGGCAGGAGCCGCTGCCGGAGCAGCGCTGGCTC
GTCCCGGTTCCTGTGGGTAGCGCAGAGGCGGCTGCCCCGTGCCCGGGACG
CTGCGCTAGCGCCGCCTCGGGCTCCGGCCGCTGCCGCCGCTCCCGGGNCC
GCACAGACGCTCCGGCAATGGCGCCTTTGCTGCGCCGGCGGCCCGGGCCG
GGCTTGTCCCCGCTCTGCCCAATCAGCGCGCGAGANCGAGGAGTGACGGC
AGAATCAGCCAATCGCAGCGAGGGGCGGGCTCTGCACACGGCACGGNCTC
CCCTCCCTTTCCCCGAGCTCCGCCATTTCTCGGAAACCTCGCCTGAGGAG
CGGCTCCCGCGCTGGGCCCGGCCCGGGCATCGGGCCAAGGAACCGCTGCT
GCCCTGAACCGCCGGGAGCTCGGGGTGAGCGGGAGCTGAGGGCGGTGGGA
GCTGGGGGTGAGTCCGGGATGGAGCCGGGACCCACCTGGAGCCCCGGCAG
GAGCCCGAGGCGGGCAAGGGATGTTTGAGAGAGGCCCCGG
>oenMel6-8547#Unknown
TGTCCCTNTCGGGATACGGGCGGTGTCCCGTGTCCCCTGTCCCCATGNGT
CCCGATGTCCCCGTGTCCCTGTCCCCAGTGTCCCCTGTCCCCCGTGTCGC
TGTGTCCCCGAGATCCCGGTCCCTGCACGCCGTCCCACTGTGTCCCCACC
GTGTCCCCATGTCCCCGTGTCNCTGTCCCTGNTGTCCCCAGTCCCTGTCC
CCGTGTCCCCCTCCCATGTCCCCGNTGTCCCCTGCCCGTGTCCCCGTGTC
CCCCCAGGGTCCCCCGTGTCCCCTGTCCCCACGTGTCCCCGCCGTGTCCC
CGTGCCCCGTCCCCGTGTCGCCCCGGGTCCCTCCCGTGTCCCCACGGTGT
CCCCGTGCCCCCCCGTGTCCCCGTGCCTGCCCCGTGTCCCCGCGGTCCTG
GTCCCCGTGTCCCCGCCCGTGTCCCCGTGTCCCCGCCTGCGGCGCCCCGC
GGGCCCGTGCTGTCCCCCCGTGTCCCCGTGTCCCCAATGTCCCCGTGTCC
CGTGTCCCCATGTCCCCATGTCCCCCCGTGTCCCCCCGTGTCCCCCCGTG
TCCCCAGGCGGGCCGCCCCGCGGCGCGTCCCCGCCCGCCCCGTGTCCCCA
CGTCCCCGTGTCCCCCCCGTGTCCCGCGTCCCCGTGCCCCGTGTCCCCGC
GTGTCCCCGCGCCGCGTCCCTGCCCCCCGCGTCCCGTGCCCCGTCCCCTG
TCCCCCCATGTCCCCGTCCCGTGTCCCCACGTCCCCGTGTCCCCGTCCCC
GTGTCCCCCGTCCCCGTGTCCCCTGGCTGGCAGACGCGGGCGCGGTGCTC
GCCC
>oenMel6-6136#DNA/PIF-Harbinger
ATTTTTCCCCACGGTGAATGCTTAAAGTTGAGAACCTGAATNCATATTTA
GGCACCTNAATGAGTGGCCTGATTTTCAGAAGTGCTGAGCACCTCGCAGC
TCCCATTGACTTCAACGGGAGCTGCCGNNTCTCAGCACTTCTGAAAATCA
GGCC
>oenMel6-4390#RC/Helitron
AAATTCCCAAAATTCCGGAATTTGAGTGAATTCAATCCCAAAATACCCAA
TTCTGAAAGATTCCCAATCCCAAAATTCCCAATCCTGAGGAATTTCCTCC
CAAAATTCCCATTTCCTGTTCCTGCTCAGGACGGCCANGNACCAGGGTGG
GNCCTGCGTGTGATTCCCAAAGAATCCCCGGGAANATCCCAGAACCTCTC
GGGATCTGAGGGAATTCATCCCGANATTCCCGATTCTGAGGCTGACTCCA
CCCCAAAATCCCAATTTCGGGGGATTCAATTCCCAGAGTTCCCANTTCCN
GCTGNAGCTCAGCACCACCATGCACAGGATGGGCCCCGTGTGTGATTCCC
AAAAAATTGCCAAAAATTCCCAAAATTCCTGAATTTGAGGGAATTCAATT
CCCAAAATGTCCCAATCCCCGNGGCANNTCATCTGTTNCTGCNCAGCACC
NCCGTGCACAGGATGGGCACAGAGTGTGATTCCCAAAAAANTCCCATTTN
GATTCCTGAGTTTGAGGGAACCCGTCCCGGAAAATCCCAACATTCCCGAG
GGATTTCATCCCCGAATTCCCTCCAGGATCCCGATCCTGGGGGATTCCAG
NGGATCCCAGGANGTTCTGGGGGGATTCCAGGGATCCCGGTTCTGGGGGG
CGATTCCGGCGGATCCCAGTCCTGGGGATCCCGANNGTCCCTGTCCAGCA
GCCCCGTGCACGGACGGGCCCCGCATTCCCAAAATCCCCCAATTCCCAAA
ATTCCCAAAANCCCTCAAATNCCAGGGAACGNAATCCCGAAATTCCCGAA
CTCCGAAAAATCCCCGAATCCCAGAACCCGNTCCTGAAAAATTTCCCAAA
ATCCCCAAATTTCCCATATTCCTGAAAATCTCAGGATCACCAAAATCCNC
AGGATGGCCCCGAATCCCGAAACATTCCCAAAAGACTCCCAAATTCCCGA
ATCTCAAAAAACCCAAAATTCCCAAAATTCCCAAAATTCCCGAGGAATTT
GCCCCAAAATTCCCAGAANTTCCCGTTCCCGAATTCAGCCCACCGCCAGA
GGATCCCTCCGAGGATTCGAGAAATTCCAAAATTCCCAAATTTCGNGAAT
CTGAGTGATTAACCCCAAAATTCCCGAATTCCCAAAAGATCCGGAATTCC
TAAAATTCCCATTTCCTGCTGCTGTTCAGCACCACCATGCACAGGATGGG
CCCTGTGTGTGATTCCCAAGGAATCCCCAAATCCGATAAAACCCCCGGGT
CTGGAATCCCAAATCCCTAAAACTCCCGANCCTGGAGAAATCACTCCCGA
AATCTCCATCCCNAAAATCTAATCCCCAAAATTCCGATTCCCTAAGGCTG
CGGATCCACCACTCGATTCTAGGAATNTNCCCTAGAATCTTGTGTGACAT
TTTCAGCTCCNAAAAATTGCCAAAAATTCCCAAAATTTCTTNATTTAAGA
NAATTGAATCCCGAAATTCCCAATCCCAAGGGATTCCGTCCCAAAATTCC
CGTTTCCCGTTCCCGCAGCACCACCGCGCACAGNNTGGGCCACCACGTGT
GACCNCCTAAAAAAAAAAATCCCAAAAACCANTCNCAAAATTCCCGAATT
NGGGACGAATCCTCAATCCCAAAATCCCCATCCTGAGGAATTTCGCTCCC
AAAATTCCCGATCCCGGAATTCCCGTCCCGAAATTCCCAATCCCNGGGAT
TCCCGTTCCCGCTCAGCACACCGGTCAGGAAGGGCCCAAAATCTCGTGAC
TCGNGANTTCCAAAATCTCGATGCCAAATCCCCATCCCAAANTCGCAAAA
TCCCCGTCCCAAAAATCTGAGTNANNCCAGTCCCAAAATTCCCAACCCCG
AAATCCGGANTCCCAATCCNAAAATCCNNANTCCCNGCTCCAANGCCCGG
NACCNCCGTNCACAGGATCTGGGCCCCGNGNGCCAAGATTCCCAATTCCA
AAAATCCNAAAACTCGACTCTGAAATCCGAAATCTTGATACNAGAATCCG
AATCCCAAAACTCCCCGTCCCAAANTCTGAAAGATTCCCNATCCCAAAAT
TCCCATTTCCTGTTTCTGCTCAGCACCACCGTGCACAGGATGGGCCC
>oenMel6-7975#LINE/CR1
CAAGAGAAAGACAAATAGAGAATTACACCAGCTCAACTTAAGTTCCTGGA
AAAACGCTGGAACAAATAATCAAACTGTTTGCAAGCACCTNGAAGATAAA
AGTGAGATGAGCAACAGCCAGCGNGGATTTGTCAAGAACAAATCGTGTCA
AATCAATCTAATTTCCTTCTNTGACAGGGTAACAGGTCTTGTAGGGAGAA
GGAAAACAGNAGATGTNNCATATCCTGACTCTNATAANNCTTTAGTGTTT
CTCATGTGGCATTGTCATTAACAAGCTAGGNAAATCATGGTCTGGANGNA
AATT
>oenMel6-19508#LINE/CR1
ATCCTGGCCTGGATCAGCAATAGCGTGGCAGCAGGAGCAGGGCGGGGATC
GTCCCCTCTGCTCGGCACTGGGGCCGCCTCCCCTCAAGCGCTGGCAGTTT
TGGGCCCCTCACTGCAAGAAAGGCATTGAGGTGTTGGAGAGTGTCCAGAG
AAGGGCAACGGAGCTGGTGAAGGGTCTGAGCACAAGCTGTATGAGGAGCG
GCTGAGGATTTGGNCTATTCAGCCTGGTGAGAATGAGAGGGGACCTCGTT
GAAGTCTACAACATCCTTGTGAGGCTAAGTGAAGGAGCAGACACTGATCT
TTCCGGTGACAAGTGACAGGACTGAGGGAATGTAATNTNAAGTTGTGTCA
GGGGAGGTTCAGATTAGATATCAGGACAAAGGTTTCCTCNCGGAGGGTGG
CTGGGCACTGGAACAGGNTNCCCAGGGAAGTGGTCACAGCACCAAGCCTG
ACAGAGTTCAAANGGATTTGGACAATGCTCTCAGGCACATGGTGTGACTC
TTGGGGATGGTGCTGTGCAGAGGCGGGAGTTGGACTCGATGATCCTTACG
GGTCCCTTCCAACTCGAGATATTCTATGATTCCATGATTATCTTTCTGCT
ACCTCTCAGG
>oenMel6-1438#Unknown
GGTTAGCAAGGTGGNTTAACAGATGGANAGCGGCAGATCTGTAGAGNGAA
ACAGTTGATGCTGAGAACNCAGTGTCCATANTGCGCANNTTTCAGGGCTT
TTTACTTCGGACTAGCTCTAGTCTGGCCCTGTGGACTGAATGCCCGTTAG
CAGCTGGAGCGCATTAGNTGCGCTCCTGGAGTGCATCTTTCAGNTTAGTT
TCATCTGAAAGGAATCCAGTTCGTGCGCTCCAAAAGCACTCCGCGACGTG
AGCCAAAGCNCAGTAAGCGGGAACGATCGGGAGATTCGCTTCAAAAGCAT
GCTCCTGATCCGAACTAANACACT
>oenMel6-306#Unknown
CCAAGCCGAGCCGAGCCGGGCCGAGCGGAGCCGGGCCGTGCCNGGGCCGA
GCCGGGCCGGGCCGAGCCGGGCCGNGCCGAGCCGAGCCGAGCCGGGCCGA
GCCGGGCCGAGCTGCGCCGGGCCAAGCCGTGCCGGGCCGTGCCGCCGGGC
CGAGCCGGGCCGGGCCCGCCAAGCTCGGCCCCGCGCCCTGCTGTGCCAGC
CCCGGGCCGTGCCGGGCCGNTCCGTGCCATCCCGGGCCGTCACGTGCGTG
CCAGGCTGGNCGGGCTGCGCCCGGCCAAGGTGTGCCGGGCCCGGGCAATN
CCACGCTGAGCCGNGCCGGGCCGGGCTGNGCTGTNCCACGCCGTGCCGGA
CGCAGCAGTGCCAGGCCGNGCCGTGCCAGGCTGAGCTGAGCCAGCTTGCC
ANCCGTCGCCANACCGCGCCGNGCCATGCCGNACTGTGCCAGGAGGCCAG
GCTGNGCTGACCCGATGCCGTGCCGAGCCCAGATACGCCAGGCCGTGCCG
CCCCGANCCGTGCCANGCTGTGCCAGCCCTGTGCCTATGTCATGCCAGCC
GCCATGCTGTGCCAGGGCCGNGCCGTGNCCCCGTGCCGCGCTCCGNGCCG
NGCCGTCGAGCCGTGCTGTGCCGTGCCCGGGCCGTGCCGTGCCGTGCCGT
GCTGTGCCGTGCCANGCCGTGCCGTGCCACGCCGCGCCGTGCTGTGCCGT
GCCATGCCGTGCCATGCCAGTGCCGCGCCGTGCCATGCCGAGCCGTGCTG
TGCCGTGCCGTNCCGTGCCGTGCCATCNCTGTGCCGTGCCAGCCCTGTGC
CGTGCCGCGCCCGGCCGTGCCAGCCCAGCCGTGCCGTGCCGTGCTACGCT
GTGCCATGGTNCCATGCCATGCTGCGCCAGCCCTGTGCTGTGCCGTGCCA
GCCCCATGTCACGTNAGCACCCANGCTGTGCCAGCCT
>oenMel6-225#LTR/ERVL
GAGAACTGTGTGTAAGGTTTTCATTATGCAGATGGTAATAGAATAAGGGG
TGGATA
>oenMel6-20337#LTR/ERVK
CTGGGAATGGGGACAGGGACATGGGAACGGGAAAGGAAACAGGAACAGGG
AATGGGAGTATGGGAACCGGACAGGGAATACGGAAATAGCAATTGGAGAG
AGAATATGGGATGGGGATTTAGAAGATGGGAAAGGGATTGGAAATTGGAA
TACGGGAATGGGATTGGGAATAGGAAATGGAAATGTTGTACATACATATC
TGTGAGAGCTTCCTGTCAAATCCTTATCCTTCCCTGNGCTGCTGCGCCGT
GCCCAGGGCCGCAAAGGCTGGAGCTGCAGTCAGGCTGCTGCTGGGAAGAA
GGCAGAGCAGGAGCCTGCTGCCCATGGCCCCTGCTCGGCCCGGGCGAGGG
AGATGGCAGCCTCTGNGNCNCNGGGCTGCTGGCAGGATGGGCTGCTGTGG
CCAGCTGGGGGCCTGCGAGCTTAGNGCCCAAGGCCTTGTGCTCTCTGCAG
CTGGCCAAGGGCAGCAGCAGGGCTGGAGGGTTCGTGTGGCACAGGCAGCC
CGGGCTGTGGAGCCCTCGGGGCCCATCGGNGCNGAGNAGGCACCGGGAAT
GGGGACGGGAACTGGGGACGGGACTGGGACAGGGACAGGGAATGGGGACA
GGGATCGGAACTGGGACAGGGAACGGGGACGGGGACCAGGACCGGGACTG
GGAACGCTTGGGGCAGGGATGGGAACNGGATAGGGACCGGGCATAACNGG
GATGGGACCGGGATGGGAACGGGGATGAGACCGGGATAGAACCGGGACGG
GGGATAGGACCGGGAATGGGACCGGGGATGGGACTGGGAATACGGGNCGG
GACTGGGAATGGGGACAGGGACCGGGGATAGGGACGGGGACGGGGACGGG
GATGGGGACAGGGACCGGGAACGGGGACGGCGATGGGAACGGGANCGGGA
ATATGGGACCGGGACCGGGAATAGGGATGGGGACCAGGAACATAGGANTG
GGACCGGGAATGGGGACAGGGACTAGGGCTGGGACAGAACGCGGAATAGG
ACCGGGAATGGGAATATGGGAACGGGACAGGGAATGTGGAAATAGCAACC
GGAGAGAGAATATGGGACGGGGAACAGAAGATAGGGANCGGGACTGGGAA
CGGGAATACGGGAGCAGGACNGGGAGTACGGAACTGGGAAATGGGACAGG
GATATGGANACGGGAGACGGGAACGGGACAGGGATATGGGACTAGGAATA
TGGGACTGGGAATATGGGAACGGCGACCGGGCAGAGAATACGGGACAGGG
AGAGGGAAGGAGAGCGGGAATGGGAATTGGACTGGGATGGGGGCAGGGGG
ACCGGGAGTGGGGGACAGGGGAATGGGACGGGGGACACGGGGACAGTGTC
AGGGCAGGGGGTCCTTGATCAGCTGCCCCAGAACCTCCGCCAGGGTCTCC
CAGCGCAGCCGGAGCCGCTGGGCCTGGGGGCCCAAAGCCCTGAGCAACCC
CCAAGTCCCTCCCAGGAACCCTCAANTCCCTCGAACCCAGCGTCCCTCAC
ATCCCCTGGAAGATCCCCCCACGTCCCCAAGCACGTCTTAGTTCAACTTC
TTTATTTTTACCCCGGTTTTGNGTGTTTGGGAAGGACGAAGAGAAATGCA
AAGAA
>oenMel6-16135#LINE/CR1
CATTTGCATCCAGGAGTTTTCAAAGAGCTGGCTAAGAAGGNATTGGAGCT
GTTCATAAGTCTTGGAACATCAGGGAAGTTCCAGAAGACCGGAGGAAAAC
GAATGTCGTGTCAGTNTTTTAAAAGAGGACATCACGGGTTCTAGAGTGCC
AGCCTGNCATCGATCCCTGGNAAAATAATGGAANAGCTGATATGGGACTC
GATTAATAGAGAATTAAAGGAAGGTAATATAATTAATGCCAGTCAACGNG
GGTTTATGGAAAATAGATCTTGTCAAACTAATTTGATATCTTTCTTATGA
GATTACAAGTTTGGTTGATAAAGACANTAGTGTTGATGTAATAGATTTGT
TCTGCAAGGCATTTGACNTGGCANCGCGTGACATTTTGATTAAGAAGNTG
GAATNCCAACATGGCACACATNAAAGGGATTAAAAA
>oenMel6-4895#LTR/ERVL
GTATGGGGTTTGCATGGCCAGGTTTTGGTGGTGGGGGGGGNTGCAGGGGT
GGCTTCTGTGAGAGCTGCCAGAAGCTTCCTCCGTGTCCAGCAGAGCCAAT
GCCAGCCNGCTCCAGGACACCGNAGCCGGCCAAGGCTGGGCCAATCAGNA
ATGGTGGTGACACCTCNGTGATAGCAGATTTAAGAAGAGAGCAAAAAGTT
ANTCCACAGTTGCAATNGGGTCCAGAGAAGAGNGGGGTGAGGACATGTGG
GAGAGCAGCCCTGCAGACGCCCAGGTCAGTGCAGGAGGAAGGGCAGGAGG
TGCTCCAGGCGCCGGAGCCGGGACTCCCCTGCAGCCTATGGAGGCCATGG
TGAGGCAGCTGTGCCCCTGCAGCCCATGGAAGGCACGNGAGTGCAGAGAT
CCACGTGCAGACCCTGAAGGAGCCTACGCCAGAGCAAGAGGTTGCCCAGA
GAGATCCGCGACCCCGTGGGGGAGCCACGCCGGAAGCAGGNTCCTGGCAG
GGANCTGCCGACCCCGTGGGGAGAGGACCCACGCTGGAGCAGGTTTGCTG
GCGGGACCCGTGACCCATGCTGGAGCANCCTGTNCCTGAAGGACTGCACC
CTGTGGAAGAGTGACCCACGCCGGAGCAGTTCGTGGACTCACGCTGGAGA
AGTCAGAGAACTGCCTCCCGTGGGAAGGAACTCACGCTGGAGCAGAGGAA
GNACTCTAACTCCCATTCCCGACCGGCAGTAGGAGNAGCAGTGACGAACT
GACCATAACTCCCCGCAGTCTGGGATAGGAGGTNGAGCTCGGAAGGAGGG
AAGGGTAGAGGGAAGGTATTTTAAGGTCTGGTTTTACTTCTCATTATCCT
GCTCTGATTTNACTGGTAATAAATTCAATTAATATCCCCAATTCGAGACT
GTTTTGCCCGTACGGTCGGTAATTGGTGAGTGATCTCTCCCGGTCCTTAT
CTCAATCCATGAGNTCTTCGCTGTATTTTCTCTCCCCTNTCCAGCTGTGG
CTTTGGTGGGCGCCTGGCATCCAGCCAGNGTCAACCCACTACA
>oenMel6-3344#Unknown
ACAGATATAGAAGGCGATNACGAGAACCAAACTGGTCAGTCACACTTAAT
TGATAGAGTGTGGGAATGTTTATTCCAGTGAGTATCATCAAGGACCTTNT
CAATTAGATAAGATATCAAATGGGGTAATAAGGAAAAGAGGAAGCCATAA
ACAAAACAGACACAAACCTGACAAACATAANGGAGACGANGACAAGAAAC
AAACCTGTCAGTCACACTAATTGATGGGCTATCAGGAACCGCAGGCAAAC
CGGGACCTTGCCACTGATAAGGATGCAAACCTGAGGGTCCAGGATCTCGG
GGTGGCGTAGTGGGANTATGCAAACTGATGAGGAAACGTGCAGGGTAGAG
GGACGGAGAGACAGATGGAGAAAGGTGACAGAAAGGGTTNTAAAAGGGCC
AGTTACTCGTAAAAGGAGGAGGGTCTTNGCGTGATCGCCGCAGTTTGTCC
TGTATTCTTGTTAAATNTTTTCTTAACTATCTCTNTGCGTAGTGACTCTT
TCTCTCCTGCAGTAAGTGTTCTGCGAAACTGTGTGATATGTGTGANTGAC
AACTGGAGTCCAGATACTGGGGTGGGACAGGTGCCCCTGCTCTGTGGTGC
CAGCTACTGGCCCGTGAGAACGGGGGGAGTCTCAGCACCANTNACTGGAG
NNAGCGGGGTCTCANAGCTAACCTCCAGCCACTGGGGCGGGAATGGCATC
TGTGCCCGAAAACCAGCTACTGGGAGGGATCAGGGTGAGTGAGGCGGGCA
AGGGGCTCGGCACCGGCCGCNGNAGCAGGACCGAACGGNCANAGNCCGTG
TGCCTGGTGCCACTCTGAGGGGGCAGAGGGGAGCGAGTGTCTGTATCTTC
CCCAGTTCANGGGTGCGTGTGTGTNTGCTATCCTCTAAGAAATCTCAGGC
TGGACCAGCCGGATCCAGGGGGNCCTGGNTGGCTGGAGGGTCGCGCAGGT
ATTTNGGGGGACCTGTANGTAGGGTGCCCGNGGGACAAGCGCTGGGTGCG
TGTTTGCCGGCAAATCAAGCTGCACTAGCCGGAGGGTCTGGGGACCGTGG
AGCAGGTGAGGGGACTTGGTGTNCAGGCAGGGGTGCCGGGAAGCAGAGTG
TCTGCCGGTTCGAATACGCGTGTGCTTGTGAACCTAGAGAGTGTCGNGCG
TGTGCCTNCACTTGTGANCNCCTGTCTCCGCCNGCCGAGAGGAGGAGNGG
ACNTGGCCTGTCCGTGTCATGTGTCTNATGTGGGTCCTGTATGTGGGNGC
TGTTGGAGGCAGAATT
>oenMel6-3299#RC/Helitron
GTCCTGGATTTCTTGATATCTCNAAAAATTCCCCGNAAACACAAAAAATC
CCGAAAAACCCCGCAAAAATCCCAAAAAATTTTCCAAAAACCCCAAAAAA
TTCCCGAAAAATCCCAAAAAATCCCCAAAAATTCACAAANATCCCCCCAA
AAATCGTCCTAAAANTTCCTCAAAATTCCCNAAAAATTCCAAAAAATTCC
CNTCCCAAAAAATCCCCAAAAATCCCGGAAATTTTCCCAAAATTCCCCAA
AAAATTCCCAAAAAACAAAAAACCCAAAGAATTTCCCCAAAAATTCCGGA
AATTTCCCCAAAAAATTCCCAAAATTCCCCAAAATCTCAAAAATTCCCAA
AAAATCCCCGAAAATCCAAACCCCAAAATTCCGGAAAATTCCCNAAAAAT
CCCGAAAAGATTCCTTCGGAAATCCCGAAAATTTGGGGGGTTTTCGGAAT
TCCAGGGGAAATTTTGAGGGNATTCCGAGGATTCAGGGGAATTTTGAGGG
GGAATTTCGGGGGATTTTTGGGGTGTTTTGGGGGAGATTTTGGGGGGNTT
TGGGGAGTTTGGGGACTTTTTTGGGTATCCCCGGGGATTTGGGGGAAATC
TGGAGATTTTGGGGGGTTCTNGGGGAATTTTGGGGTATTTGGGGGGATTT
NGGGAAGNATTCGGGGATTTTGGGGTGGTCTNGGGGGATTTTGGGGGGTT
TCTGGGGGTTTTGGGGTTGTGGGATTTTCGGGGGGGTTTTGGNTTTGGGG
ACATTCCCGGGTGTTTTGGGGTACCATTCCCGGGCGTTTTGGGGCTTCGT
TCTCGGTTTTTGGGGTCCCTGAGCCCGTTCTCGGGGTGCCAGGNTNCTGG
GAGNCCAAGGAGCGGCTCCTGGTGGGCGGCGTTCCACNNCATCCCCTTGG
CGGAGTTGGACACCGAGNTGCAGGCGGGCGCCCGGAGCATCTGCACGGCA
NCCAGGCAGGGAGGACACAAAAAGANGGAANCCAGGTATCCGCAANAANA
NTGCCTGGGNTATCCCGGAAACTTCCCAAAACGCCCCAAATCCCGCCCAA
AATACTCAAACCCCAGCCCAAAATCCCCAACCAGNCAAAAATNCCCAACA
GCCCAAAGTCCCAAAACCCCTAAAAACCCCNAAATGCCCAAATGCAGCCC
AGAGCAGGGCTCAGCCGCCTCCCCTC
>oenMel6-5129#LINE/L2
CACTGAGGGGAAGTGCATCACAGACACTCATTTTTCTGGTNCAAGGCAGG
CCCTTCCCGACCTTGCCTTCTCTAANAAATNCACAAGAACATTCAAANTT
AAAACCAAGGAATCAACAAGGCACTTCTCTGCACACACTTCCTCCCTGGG
GAGAGGAGAGAGNACGAACAACATGTGACAGATGTTAGTCACGTTGCTTA
ATGCACTNCTGGAAGCGGCTCAGGNACGGCAATGAAGAGC
>oenMel6-23797#Unknown
GTGAGCAGGAAGAGCTGACGAGGAGGGCCCTGCTCGGTGGTAATGACACA
GATTCAAGCTGGTCACCTGAACTGGCAGAACTGGAGGAAATGTCAGGGCA
TCAGAAGGTGCTGGAATGGCTGGAAGCCAATTCCCTCAGTGATTATGATG
CTGAGAAGGGGACCAAAGCTGAGCTCCAGAAGCTGTCCAAACTGAAAAGG
CTCCTGGAGGAGCTGGAGGCCGAGTTGAAGGAGCTGTTGGGCTCAGAGGT
GGCAGCAGAGGCAGCCCCTGCCCTGCCCAGCGCCTCTCGTGCCCCTTGGA
GCCCCAGGGGCACCGAGCTGGCAGCTGTGACCCCGAGCAGAGCTACCGAG
GAGGAGCAGGAGCCTCCCCAGGCTCTGGCTCTGCGGGACACAAAGGCAGC
AGCTCCTGCTGTCCTCAGTGAGGACGGGACATCCCTGGGGACAGGGAGCA
CCAGGGAGCCCCTGAGCCAGGCTGTGCCAGAGCTGCAGGCACTGAGGCAG
CAGCAGCAGCAGCAGCAGCAGCAGCAGCAGCAGCAGCAGCAGCAGGATGC
CCTGGAGCACTGCAGTGCTGCAGGAAGGGCAGCAGCAGCTCCCCCAGAAA
GGGAAGGGAGCTCCGTGGCTGCCCCGCACAGCCCCCCCAGGCCCTGGCCT
GCCCAGCCGGGAGCCCAGGCCCTCCGCGGGCAGCCGGCTGCCCCCAGGAA
ACGCCCCTCCCGCTTCAGGCGGGCGCTGCGGGCGCTGCGGGGGCTGTTCC
GCTCTGGCCCTGCCTGGGGCCACGGCCCGAGGANTGACACACACAGGGCA
CCGCAGCAGGGATTGCTCCAGAGCCTCCCTCCTGCAGGGCTGGCACACCC
GGGCTGCCAGCACCCATGGGAGCTGGGCACCAACAGCCAGAGAGAAACCA
GCACTGAGGCCACAGCCCGAGGACGGTGAAGGAGGGGAGGAAGAAGACAA
TGAAGACGATGAAGATAAAGANGACAAAGCAAAGACGACAAAGAAGACGA
ANATGGCAAAGACGAAGACGACGAGACGATGAAGAAATGAAGAAGACGAA
GAAGACAANGGCAAGACGAAGAAGGCGAAGAGAAAGAGACGAAGAAAATG
ACGAAGACGGAGAAGAGGAAGAATANTTTAAAAATACATAGAAGAATANG
AGTAAGATAGGAATAAGATTTTAAATACATAGAAGAAGAAGAAGACAATG
AGGATAGGGATAGGAGAATAATTTTAAGATATAGGAATATATAAGAAGTA
AGAATAATATAGGAATATATCTTAAGAGTAATAGGAATAAGAATTTGAAT
TTAAACATGCACAGAAGGAGAAGAGTAATAAGAATAAGAAGTNGAATNTT
AAAATACGTAGAGGAAAAGAATGAGTAGTAACAAGGAGAATAGAAGAATA
GCGGTTNAGAATCCATAAATGAAAAGAAATCTAATGAATAAGTAAAATTA
GCAAAGAATTTGTATTTTATTACACNTTGTGNATTTGCATTACAGTCTAT
GATATAAAAACATGAATATACAATATGTTGTAATTACGANACATTATTCC
CAGGAAATTACCAAANAAGGANAGAAGCGTTCAAATTACCGAAGAATTTG
TTTACTTTTAAAATAAAACTTGTAAGGCACAANAGGAGAGTCTCCGGATT
TCCTGCCCTGTCTCTCCGAGGCGCTGATGTATTTTCCCCCTCAGTGCCGC
TGGGTGCCCTGTGAGCAGCGGCTGCTCAGCCCCAGCGCCAGCGGGAGAGT
TCCCGGCGGGGCCGGCAGGGCAGGGCTGTCCCTGCTCTCTGCAGCAAACG
AAAGGCGCCCGCTGAGCCCGGCTGAGAGAGAGCTGTGCTGGGAACCGCTG
TGCAGCAGGGCTGGCCAGGGGGACAGCGGAG
>oenMel6-4061#LINE/CR1
GAGTACTGTGTCCACGTGTGGAGTCCTCAACATGAGAAAGGTGTGGACCT
GTTAGAACAGGTACAGAGAGAACCCCAAAGATGAGCAGAGGCCTGAAGCA
CCTCTCCTACAAAGACAGGCTGAGAGAGTTGGGTTTGTTCAGCCTGGAGA
ATACAAGGCTACATGGAGAAATTTTGACTTAAAGGGGGCTTAGAAAAGAG
TTAAAATGGCATTTTTACAGGGCATGTAGTGATAGGACAAGAAAGAATAG
TTTAAAAATTAAAGAGATTTAGATGTTAGGAAGAAACCCTTTACTCATGG
AGTCATAGAATCATTTAGGTTGGAAAAGANCTCTGAGATCATTGAGTCCA
ACCCATGACCAAGCGCCCCTAGACCATGGCACTGAGTGCCACATCCAATC
ACCTCCAGGAGAGCTGCTCCACCACCCCTGTGGGCAGCCCATTCCAGTGC
TTTACAGCCCCTTCAGTGAAGAAATTCTTCCCAATGCCCAAACTGGANCT
CCCCTGGCACAGCTTGAGGCCATTTCCTCGTCCTGTCACTGGTTGCCTGG
GAGAAGAGACCAACCCCACCTGGCTACAGCCTCTGTGCAGGCAGCTGTAG
GGAGTGATAAGGTCTCCCCTGAGCCTCCTTTTCCCCAGGTTACACAACCC
CATCTCCCTCAGCTNTTCCNCATAACTNGAGAGCTGCTCCAGACCCTCCA
GCCAGTCTTGCTGGCCCTTCNCTGGACNNACTCCAGCCCCTCAATGGGTG
TCCTGTANTGGNGGTCCCAGAACTGGACACAGCATTCCAGGTACAGCCCC
TCAATGTCCTTCTGCAGTGATGGCCCAGAACTGGACACAGCACTCCAGGT
ACAGCCCCTCAATGTCCTTCTGTGGTGATGGCCCAGAACTGGACACAGCA
CTCCAGGTACAGCCTCAGCAGTGCATTCACTTTGAGNCTGANNAGGCACT
TCTGTGCGTCCTCTGNCTGCTCCAGAGAAGCTGTGGATGCCCNCCCCTGA
AGCAGCAGCCNCNGGATGGGGCTCTGAGTTGCAGNNNCCAGGGCTGG
>oenMel6-3891#Unknown
TGTGCTGGTTTTGCATGAAAGTCACCTGAGAGGAGGAGCACAGAGCACAG
ACACA
>oenMel6-15867#Unknown
GCCCCCGCACCCACAGCACCTTCCCCGGCCGCAGCTCGGCCGCGTCCAGC
TCGTCCTGCCCGTCCGGCTCCGGCCCCTGNGGNCACCAGGGACNCCCCGA
GGGGCATCAGGGGACACTCGGGCCCCCCGGGGCACCCAGCCCTGGGGGGA
CGGGGGACGCCCCGGGGACATCCCAGAGCTCTGGGGACAGTGGGGACACC
CCGGGGACGCCATAGGGACACCCCCAGGGACATTGGGGACACTTGGGGAC
ACCCCGGGGACCCCTCAGGGCGGCCGGGGACCGCGGGGACATCCCCGGGG
ACACCTCGGGGACACCCCCAGGGCTTTGGGGACAGTGGGGACACCCGGGA
CACCCCGGGGACACCCCCGGGGCACCCCCGGGGACACCTCAGGATCTTGG
GGACAGCGGGGACACNGGGACACTCNAGGACACCTTGGGGACACCTCAGG
ACCCCGGGGACAGTGNGGACAGCCCGGGGACACCCCCGGGACACCCTGAG
GACACCCCCAGGGCAGTGGGGACACCCCCAGGGACCTGGGNCACCCCCGG
GGATTTGGGGACGGNAGGGACACCAGGGACACCCTCAGGGACTTTGGGGA
CCCCCCGGGGAATTGGGGACAGGGGGGACCCCGGGACGCCCCCCCAGGGC
ACCCCCGGGCTNTGGGGGNCGTGGGGACACCCCGGGGACATCTGGGGACA
TCCCAAGGGCTCTGGGGACACTCCCGGGACACCCCCATGGCTGGGGACAC
CCCCGGGGAATTTGGGGACGGGAACCCCGGGGACACCTCGGGGACGCCCC
AGGGGACTTTGGGGACNCCCCCGGGANAGTGGGGNTCCNGTGGGGTCATT
GGGNNCCCCCGGGCGTTGGGAACGGACCAGGAGACAAAGGGAATCCATGG
GGATGGGGGCACCAGGCACCCCCAGGGATGGGGACACCCCGGGGACACCT
CAGAGGGACCCTGNGGACANTGGGGACACNCCCGGGGACACCCCNAGGNA
ATTCGGGGACNNCAGGGGACAGGGGNCCCCGTNGGGTNTGGGGNCCCCCT
GGGTGGGTGGGGGTCCCTCTGCATGGTAGTCC
>oenMel6-1271#DNA/PIF-Harbinger
AGTTNTGTGGCTCCCTGCTCTAGATGGAAAAGGAAAAACAAAGTGTGTCC
CTGCTGTCTGCGGGCTTGTCTACACGGGGAAATTAATCCAAAATTAACTA
ANGGTGTGAATTTNAAGTGGATTAGTTAAACTGCATTAAACCTAGCGTGG
ACACTCTCATTCAGAATTAAAGCGGCCTTAATTCAATTTAGCTCAATTTA
CTTCGAAAGTGAATTAAGNTAAATCGAATTAAGGCCGCTTTAATTCCGAA
TGAGGCGTCCACANAGGGATTTAATGTAGTTTAACTAATCCGCTTCAAAA
ATTAATTTTAGTGAACTTTTCTGANTCTCCTCCTGGTNGAGA
>oenMel6-8322#Unknown
AGCAGCAAAATACATGTTTGTGCATGAATTCTGCAAATGGTGGAGCACAC
ATGAGGTGTGTATATTAGCAAATATTACTGAACAATAAGAGCAGCAATAT
CTCTGCACTGCTGCAAAACAGTTGGTGCTGAGGACCCGACGTCCACACCT
GAGGTTTTTGGGAGATTTTTACTTCGGACTAGCTCTGATCTGNTCCCATG
GGCTGCTGAAGGGGCTGTGAGGGACTCACCGGCGCAGTTCCTGTTTGGTC
CGGTTNAGATGGCCCATCGTCCACGCACTNTGAGAGAACTCCGCANTGCG
AACCAAAGCGCGGTAAGTGGGGACACGCAGAAGATTCGCTTCAAAANCNC
ACTCCTGATCCGAANTAAAATGCTAATGTAGATGCATCTGNCGCNGGCAG
TGCAAATTGGTGCTGTGGTAANTGCTGCAGTTTACATAACTTGCTGAAAG
C
>oenMel6-18010#LINE/Tad1
CTCTTNACTCCCAAGTGGAGGAAGAGATCAAATCTATATGAAATGAAAAT
GTTTATCAAAATGCATCAAGTAATGCATATNAATATCTAGCATATATGTA
ATTTAAATTAGAAAATGCTGCATATTATATATTTTAATATATATACTGTA
ATAAATAGAATATATAAAATATATATTTGATCTTTTTCCAGGCCATTGCC
TGTGGGGCATATAGACCATCACCTAGTGTTACTGTATTTTTGCCTTCNGG
TACTACATATTATAGCACCAACTCCTCTGGGAGTTCCTTTATGGAGTTTC
ACGAAAAGGGCTTCCATCATTTCAGTGCTTGTGAGAACTTGTTGCTTCCC
AGTTCTCCAGCATCCTTCTGGATTTTGGAGCATCTCAGCACTTGTGCCAC
TGGCCCTTCCTTCCTCCCCAGCCTGCAGCAGTTCCAGCCATTGCTGTCTC
CCCCTTGCTACAGCTCATTTGCCAGTGCTGCCAAAGGCAGCAGAGCTGGC
TCAAGATCCCTCTTGGCTTCTGGTGTCCAGGATGGCCTTCAGAGGGATGA
GCTGCCAGTGGGATGGGGGTGGATTTGCCCTCCCCGGGTGGCTCCTGGTT
GGAGTTCTATGCCCAGTGGGGTCCCAGAGTTTTCTCAGCTGCCTTTGCCT
GGCAGTNCTCAGCCAACGTGTGGCTCTGCTGCCATCCCAAATCTGCGCTT
CTCTGAGTGCACGTGGGGAACATGCCGGGCATGGCTGGAGATTTCCATGG
CCAAAATCCCCCAATCATCACCTTTACATCTGCTCATTGCTTTGGATAGC
ACATATCTATACTTCTTTTAGCTGAAACATTCAGTTTCCTGCAGATCATT
ACACCCACACTATTAATGTACAAATAGACAAAAATCAACTTAAGTTTAAA
AACGACATTTATTTTAAATTGCTACATCAGTGCTGCCAATATATAAACAT
GAAAATATCACTTCAAGAAACTAATTTATTGTTACAACTNGTGCTATGTA
AATATATACAATTATGCACTTCTGTTTAAAAAGTTAATTTACTGCAGCCC
TCTAAAACCNCTCACTATACACAAATATAAATTGAAGTTCAACAGCTTAA
TTTATTACATATTACAATTGTACAGCCCAAATACAAATACAAAAATATCG
ATATCCCTCTCTAAAGAATCCCAGATTCAGAACTACATTAATAGAATTTT
ATAACCATACTACTCAATACATACTTAAATATTTGTAAATACATAACCAT
GCAATATACAGATGTAAATATATAATTCATATTTGATATGACATAAAGCA
AGACATACACATATAACAAACCTTTCTATAAATACATAAATATCAATGTG
CCAATGATCCTTACAACCCTATACACAGAACTACACATCTATACTACTGC
ACAAGTCTGTAAATATAAACTAAGATGTGAACAGATCAATATACATGCAT
CAGTATAACAACATACATACATATATACCTATACAAACATCAGTCTACAT
AGATAAATATCCGTAAAATTCTAACTCTCTCAGTCCAACTTTACACCTCT
GTAACTAGAACTACATCAGGAGGGATTGCAGCCACCCACGTTCCCAGGCT
CTTCCACGGTCTCTTCCTCCCATGCAGAGCAGCTCTCCTGGACAGGGACA
GCAGATGGCGCATCTGGGAAGCGAAGAGAGTCTGACACCGAGTCAGGAGC
AGGGCCTTTCCCTTGCACCTGCACTTCCATCAGCGAAGAAAAATCTCAGN
GCCTCCCCAGGAGGGCTGGAAAGGAAAAGCAGGCCGAGGGGCCAGGCTGT
GGCGAGCGCAGCGCGGCGGGACTGTCCCGCAGCCCCCGGCACAGCCGGCA
CAGCTCCCGGGCCCTGCCAGCACGGCTGCCTTGCCCCAGGACAGCCCCTG
TGCCGGCCGGGGCAGCTGCGCTGAGCAGCCCCAGCACGGGCAGGGCCGCT
CCTGCCCCTGTGCCGGGCACTGCCCGCGGCCACAGCCCACGGCACCCTCA
CCCCACCCGGCCTCACCGGCCCTGGGGCCTCACCCAGGCTCTGTGCCAGC
AGCAGCTCCCTGCTCCTGCTCCTTCTCCTGCTCGTGGCCTTCAGCTTCTC
CCTGCCGGCTCCTGTCANTCCTCCTGCTGTCTTCAGGAACTTCGGTGCAG
CTGAGGCGAAAACGGAGGCTCAGGAATTGGTTCCAAGGCCTGGCAGAGCT
GCAGTTCCAGACCCCTCTGTGCTCCCTGCTGGCCCCTCCATCCCCTCAGC
CCCGCCATGCTCTCGGCAAACCCCGAGTCCCCTTCAGTTTCTTCAGACCC
CGCAGTCCTCTCACCCCCCTCAGTCCCTTCTGATCCATCCCGTCCCCTCA
GAGCCGCCACCCCCCTCAGCCTGTGCCCCTTCCCTGTCACCTCAGCGCCA
CCATCGCCCTCAGCTGCCCCACACCCTCAGCCCCAGCAGCACCTCAAGGT
CACCGTCCCTTCAGTGCCAGCGCCTCCTCAGCCCCTCAGCCCCCTCAGTG
TCACCGTCCCTCAGCGGCTCCTCAGGGGACACTGCCTGCGGCCACCGGCA
GCTGCCACCGCTCCAGGGACACCCGGGGCTGGAACTGCTGCTCCGCCCGG
CCCGGCCGCCGGCTCGGGCCCAGCACAGCAACAGGAGACAGAGGGGAAAA
CAAGAGATTAAGAAGGCATCCGTGGAGGGAAAGAGGTAAATAAGGCCTGA
ATTTATACAGATATCAATCTTTGTAATGAAACTCCCACATATAAATACGA
CTACGCCTATTTATAAATTTAACTATATACATGCAAATGTAACTATACAT
ATGTATGAATCCATCTAGGCCCATCTATAACTTCACATATAAAAATATAA
CTATATACAACTATATATAAATTAAACTATACGTATCTATAAATACAACT
ATATAGATGGATAAACATAACTATATAGACATAAATACACTTATATAAAT
CTATAAACATATAAGCTATATAGATATATAAATATAACTGTACTTGTCTA
CAAATACGGCTATTGGCAGAGGGATTTCACCTGCCTGATGGTCACAGGTC
CTCCCTCTGTCTCTTGCTGCCACACAGGGCAGCCCTCCTGGAGAGGTCCA
TCAGATGGGATCTGGGAAGCAAAGGGAACGCTGAGTCAGTCTTGGCCCTT
GCGCATGTTTCCCTTGGGCACCAACTGTGCTTCTGTCGGGGACTGTTCAA
GATGGTCTGAAAGGCAGATCTCGCTTGGAATTTGAAGCCTGCTCTTTAGA
GAACAGGGACCCTTCAAAACAGTGTAAAGCACTGAAGTATCTCGATAAAG
TCTCAGCACTCACAGTGCAAATGGCACCCACGAGAGCTTGAAGCACAGAC
TGTCCCAGCTCCCACAGAGAAGCCCAGCCTTGTTCTTTCTCTGTGCTGAC
AGAGAGACCTCAGTCCTCACTGAAATGGCTGAAGTTGAAGGGTGCTGTCA
GCTGAGTTATGAAACCAAATTGGGACACCCAGCTTCATGACACAACTCTG
AAGGGGTCAGCTTTATTCCCTGCTCTCTTGCCACAGCAGAGGACTCAGTG
TCAGAGCCTCTGGAGAAGCATGGAGGGGAAGGGCTAGGGGAGGTTTTGTC
AGTGCAGGATCTGAACTAAAGGCACAGGGAACCATCAGCTCTTCAGACAA
GAACTCAACTCCTCTGATCACCCATCCTGTGAGAGGCAGGCTCAGAGCAG
CTGTCTCACACCTCCCTAAACCTTTGGGCTCTGTCCTTAACAGGCTCCTC
ATGCTCAGGGGAACTGTTCCCACAGCTCTCGGCGCCAGACGAAGCTTCCT
CTGCTGCAGCCCTGTTGAGAGCATCCTCTCCTGAAGACTCAGGGGCAACA
TTAACATTCCCCTTGAAAGAGCAACAGAAAGAAACAAACCCGAAGATCAC
TTACCATTATTTTTGTAATCATATCAGAGATACAGGAACTCTCCTTCTCC
ACTCCCGGGAGATGTGGAGCACAAGGGAGCCCACACGGCTCACATGACAA
GCATTTTAAACTCAGAATTTGGGGGGCAAAGATGAAACTGAAGCTCTTAC
AAATGACCTTTGAGGCCAAACATGAACACAGAAAACCAGAAGACACCAAG
TGAGGGGACTTGCCCTCACGTTCTGACCCTTGCTTATCCCACGAACTGCA
AGAAATCAGCCAGCAGAAAGCCAGGGGCCCTCCTTGTTGACAAACAGCTG
TCTGCAACGGCAGGGCTCAGTCCCAGCACTGCCCAGGGCTGTGTGCTGCA
AACCCGCATGAAAAGCACACATTTCATTTCTGGCTGGGAATCTCACCACC
CCCACCCAACCGCTCACACAATCCATCACCAGGTGCTGCTTTTTAGAGCC
CTCTGCTGCTGCCACATATGTACGACCCAGACAAACATTTCTGGATCTAG
GTTATTTCCAGGATCAAATTTTCCNGTGCNAAAAATCTGTATATTTGGAG
GGTGAAAAANACCAACCCCAACCCATTTCTTCTNCAATAGCTCATCTACT
GGAATCCTAAAGATGGTTCAGACCCTGCAATGTTTCCTTTTAGTATGGAA
TAAAATGCTTTTGAAAACTGCTGTGTGTGAATTTACANAAGACAAAAGAC
ATNCCACTTGAGAATAAAATATTAGTAAATAAAAAAAATCCCACTCCCCA
CCTTGAGTCTGTCCTTTCTCAATCATGAATGCATTGCAGCCAATGGAGTC
AGCACATCAACAGAAAGAGAGGCATTCTTTGGCCAACAGGTATAATAACT
GCAAAAAGGCCTTTGCAACACTCCAGTCTGGGAAGAGTTAGAGAAACAGG
ATTACTCATCCAAAGACTGAATCTGTCAAACAAAAGGACAGAAAGCTGCA
GCTCCAGCCCATCCCCAAACACGGCTCTGGGAGCGCCACACGCACAGCAG
GGCTCACACAGCAGCAGCAGCTGCAGCCCAGCCCTCGCTCTGCCTTGGCC
TTCCAGCACAAAAGAGGCAGAGCCCACATCTGCTGCTGGAACTGAGGCAC
CTCTTGCATGCACCTCCCTGCACGGGACACTTGGCCTTCAGTGGCACTCT
ACAAATACTCTTCTCTTCTTTCCCATCAAACAAAGTCTGGTAGAACCTAG
AATGCATCACTACGAATGCCCCGCACGAGGCATTCTTCCAGGAAAAGGAA
CAACCAAACATGACCGACAGGCTCACATCTCCCATCCTCACTAAGGCGGG
AAGACTTTTTCATCCTTCTTATAGAAATCTTACTTTACAAGAATAATTAG
GTAACTATATAATAATGAACCAAATGAACTTCAAGAAGCCTTTGCTTCTC
AGCCGCGTAACACAGTTCAAAATCTCTCAGTCCAGCCTCTTTTATTCCCA
TCCAATGGGGTTACCTGAGCAGAGGGAGACCTTTGAGGCAGGGATCTCCT
CATCTCCCAAATCATTTTCTCTATTTCTGCAGCAGCAGCATTCCATGCTG
AGCTGGAGGCCGTCAATGCTGCACTACCAGCACTACCAGGTGGAACACTG
AGGGCTGAAGTGCCCGGTGTGGCTGCAGGAATCCAAACACATTGGTCAGG
TTCCAGAATGTGGCTTTGGGACACAGAGCTCTATTGCTGCCTTGGATCAA
CCATCCCAGGAAGCACACAGGAAACCCAGACACAGAATCTTGCATACTGT
AGCATCTTTTCTGCATCCTGTGTGTCTTCAAAACTTTCAGTCTTTCAAAT
CATCTGTGCATTGTTCTGACATGTCTCTGGGTAGGCTGGATAAGTTTAGG
ATGTGTTTTTCTCCAACTGCAGCTAGAATTGCACAAGAAACCCTTGGCTG
TTTCTTGGTCCTTTAACAAGTTGATGAGCTGCAGTCAGGTGCCAGTGGCT
GG
>oenMel6-3192#LTR/ERV1
TCTGCTGTGCCGTAGAGGGCATCAAGGGCGCAAGTTCTGGGGGTGTGCTT
GAGCGAATCCTGGTGTTTAAACTGCCAGTGGAAGGATTTGTCGTGCCGTA
GAGGGCACCGCTAGCAATTCTGGGGGTGAGTTTGGGCAAATCCTTGTTTA
TTGCTGCTATTTTGGCGAGCTGTTGTTGTGGTTGTGATCGGATGTGTGTG
TGTCTGTGAAGAGTGCTAGATGAGATTTTTCTACAATTCTGACGGCTATC
ATGTATTTTTGAGGCAACACTACCATCTTGTGTCGNAAGTTGTAGTTGCA
ACAAGTTAATAGTCGCTTATTCATTTGTGATACAACACTACCATCTTGTG
CTAAAAATTATAATTGCAGCGAATTGGGAACTTTTGTGTNANACGGGCCA
TTTGTTTGTTCCTAATAAATTGTTAAAAGTGGCCAGCAAAGCTCGAGCGC
GAGCCGCAAGTGCCCAACCATCCAGGGAAGGGCTCTCTAGACGGTTTGGG
CTCCAACCAGGTGAATTTTTAGCTGAAGGAGGAGACAGGGCTATTGTCGA
ATGGGGGAAAGGGAGGAGAGAGAGGGTGTTTTGAGGGGGATTGTATTAGA
GTCGAACAAGTAATTATTTGNTTTTTTGACTGGGAACTACCCCCAACTGA
GAATAATCTCAGAAACCCACAANGGTGGGGACTAATAGGGGTAACTCCTT
GCTTTTTGTGTGGGCTGATGATTTTTCATTGGGAACCAGGGTGGCATCCA
ANTTGGGTCCTTCTCCACTGCAGAGGGTGCAACAAGAGATGGTATTGTAT
ATCTTACAGAAGGAGACCTATGTGCCCAGGGTGTGCCCTGGAGCTCCTGA
GATGCNATAATTGGGAAGTAGCACACGATCAGTTTGAGATAGTGAGTCTA
GTCTGTGGAAAAGGTTTAAAGCCGGAGAATTTGGATATTTTTGAAAAAGA
CTGGGAATGGTGCCAGCTTGGTAAAATGAATTATAAGNCTCCCCTCGTAG
TTTAACTTTTAGTATTTGAGATACAAGGGTGTATTTGTGGAATTTCTGCC
CGGTCAAATAGGAGAAGGAAGCAGCCAGCTGTTTGAGCTNTTGGAGAAGG
GGGANTTCGAATAACNTAGAGGAGAGAGCAGAAATAATCAGGACTGCGTG
TGCTCAGTATTTTCGTTCCCTGAGACTACTAGGTCAAGGAAAAGAGCTGG
TATAAAATAAAGGAACTTGAGAAAAAAAAAAACC
>oenMel6-25226#Unknown
ACTTCCCTTCCCTGAAACTTCCCTGAAACTTCCCTGAAACTTCCCTTCCC
TGAAACTTCCCTGAAACTTCCCTCTTCCCTGAAACTTCCT
>oenMel6-4760#Unknown
CAGGGGTCAAAAATGGGGAAAAAAGCCCAAAANTGGGGGGGGGANCCCAA
AAATAGAAAAAATCGGGGGGGAACACCCCCCAAAAAATGGGGGGAANACC
CCAAAAAATGGGGGCATCGNCCCGAAAAATGGGGGGGAACCTCCCAAAAA
TTGGAGGAACCCCAAAAAATGGGGGAATCCCCAAGGGGAGNACCCCCGGG
ACCCAAAAAAATGGGGGACCAGCCAAAAATGGGGGAAAAAAAANCAAAAA
ACGGGGGAACACCCAAAAATGGGGAAAAGACCCCAAAAATGGGGAAAGCG
CCCAAAAAATGGGGGCNCGGGNCCGAAAATGGGGAAAAGACCCCAAAAAT
GGGGAAAACGGGGAGAGCCCCAAAAACGGGGANGGAACCCCGAAAAACGG
GGAAGAACCCCAAAAATGGGGGAAAATCGGGGGAGCCCCAGGGGACCCAA
AAANGGGGAAAGANCCCCAAAAANTGGGGGAGAATCCCAAAAATGGGGGC
GGGTCGGGGAGCACCGCGACCCCAAAAATGGGGAGGGAACCCCAAAAATG
GGGGAGAACCCCAAAAATGGGGGAGNCTAAGGGGAGGACCCGGGACCCCA
AAAACGGGGAGAGAACCCCAAAAATGGGGACGAAACAGGGGAGAACCACG
ACCCCAAAAAANGGGGAGAAANAACCCCAAAAATGGGGGGGAACACCCAA
AAACGGGGAAAACCCCAAAAATGGGGGAAGAACCCCAAAAATGGGGGGAA
ACGGCCCAGAAATGGGGGAAAAANATACCCAAAAATGGGGGAGGGCCCCA
AAATGGGGGAAAAAAAACAAAATCGGGGAAAGAGCCCGAGGGGAGCACCG
CCTGGGACCCCAAAAAACGGGAGAAAAANCCCGAAAATGGGGGCAGGTTA
CGGGGGCACCTGGGACCCCAAAAACGGGGAAAGAACCCCAAAAAACGGGG
AAGAACCCCAAAAATGGGGCCAGANTCGGGGGAGCACCACCCGGGACCCC
AAAAAACGGGGAAAGAACCCCAAAANTGGGGGTCGGGTTACGGGGGCTCT
TCCAGCACCACGGGGTACTGGGACCCCAAAAAACAGGGAGGGGACCCCAA
AAACCACGGGGAGCA
>oenMel6-45177#Unknown
TGCCCCGGTCCGCTCAGCGGGTTTAGGGGAAGGTNGTTTGATTTACTCTG
GGCGGTGCGTGGGAGAAACAACAAAATTCTCAGGAGGTTCAATAACAAAC
TTTTACTTGCAAACTTTAGAACATTAAGGTAGAATAAGGTACTTGGCAAA
TTTTAAAACATCCAGACAAAGTAAGGCACTTCATGCAAACTTNAACTTGG
CNAACTTTAANNTATCCAGACANAATAAGGCACTTACCAAGGCATTGACT
GGAATTTTTTAGTCTGGCTTACAATATATTT
>oenMel6-13073#LTR/ERVK
AGCAGCGTGNGGTGATGGTGAGGTGCCGCNGCCCTCTGAAAGCGTCTCCA
GTAGGGGANGATCCAGGCTTTGGGCAGACCGGCACACGGGAGCTCACCAC
ACACACAAGCGCTCGACAGATGACAGGAGAAGCCCAGAAACAAAGGGACG
GGAAGGGTCTTTTGTGTGAGTTCCGNNGGGCAGTTTATTNCAGCCACAGA
CAAAGGGGTCCAGGGACAAAAGANCAGGAGCATGGAAGGGTCCGGGTTTA
AATATGGGGAAAGAGGGGCGGAGCATGGGATCAGGGACCAATGGGAACAG
GGGAAAGCGGTGCGTAGGCGGGGTAAGGGACCGGGGAAACCAACGGGGTA
ACAGGGGCGGGACANTGCAGCGAACCGGGGCCAACGGGGATCAGGGAAAG
GGAGAACATTCTAGGGGATGNNCATAAAGGGGNAAAAGGGGCGGTCTGGG
CCAGGGGCCAACGAGGAAAACAGAACTGGGGTACATTAACGTAAAACTGC
AAAGGACTGTGGAGAAGCCTTTTNTCNCCATGCCCTNAGTGTCCCTCCGA
CAGCTCAGGGTCTCTCCTTCCAGGGCATGGAGATTNCTGTNTCCCNGGCA
GGCCCCAGGGCCTCCACA
>oenMel6-2130#LTR/ERVK
TGTGGGATATGGGNTTATATTTGTTAAAGTTGTTAAGGTTTATGCTCACC
AGAAGGCCCTGTGGGAAAGGCACAGCTGCAGGCTGGGCGGGCGGACAGCG
NATGAGCGGGAAGCTGATGGGTGATGGGACGCGTGGACAGCAGCACTGCA
GCTGAGCAGCCAGTGGGTGCCCTTCTGTTAAGTTTTGGTTATGTCTGGTG
GAGNTTAAAGGTATAAAAAGGNGGCGNTTTCTGCAATAAAGCGATCTCCT
TTGGATGCATAAGGGGGTCCGTGTCGCTTTGTTCCCCATTGCTACAAGGT
ATGAAAATGAAG
>oenMel6-19579#Unknown
GTCACAGCTAAGGCGAGACGGATAGGGCTGGCAACACCATCAGCCCTTTC
ACTTGCATTTCTTACCAGTCTTCATCAAACTCTACACATTTTCATCTTCA
GTCCTTATTCTCATACAACTCTGAACTCAACTCATTTTCTTCTACAGACC
TTTTCCTTATACAACACTGNCTCTTTTTCTCATAAGCCTCTCTGTTAATT
CTGTACAACTCTGTCTCCTTATCTTATAGACCTCTCTGTTAATTCTGACT
CCATTCTCTTATTAGCAGCTTGTACTGATTCCTTTACCTATGAGCAGTTT
CACACGGCTCT
>oenMel6-6181#LINE/CR1
GAAGGGGCTACTCAAACAAAACATTTCACAGATTTGACATTGCTGTCCTC
GNCCCTAGGGTNTTGTGGCTTGGACTGCTCCATGGTGGACATGGAGTTGG
ACTAGATGACCTCCAAAGGTCCCTTCCAACCCAAACTATTCTATGATTCT
CCAACAAACACTTTCAACTACAGCAGTGTGCTCTTA
>oenMel6-1821#LINE/CR1
TTTNAATCCATGGCTGCTGTGTTTAGACTTCTGTATGCAGATCTGTTCTG
CCNTGCTCAAAAAGAACATAATAGAACTGGAAAGTTCAGAGAAGGGCAAC
AAGGATGATCAAAGTATGGAANGGCTTTCATGTGAGGAGAGATTAAATAG
ACTGGGACTCTTCAGCTCGGAAAAGAGACGACTAAGGGAAATATGAAAAG
ATTTTAAAATTATGATTGCCACAGAGAAGATGAATAGGGAACGGTTATTC
ACTNTTTCTCATAANACAAGAACTAGGCACTCCAATGAAATTATCAGGCG
GCAGGTTTAAA
>oenMel6-22792#LINE/CR1
AACTGCAAGAAAGGAGTTTTTCTTTGTTTCTTTTAGTCTACAGCTATGTG
CTTAAATGTACAAACCAACATCTCTACAGCCCCTCTGTGCATTAACTGCC
CAGCCAACCTGCTTGAGAGGAAGGATCAGGCCTGCTGTGTTTATGTCAAA
GTTATGATAAGTAAATTACAAGCTACATGTTACCTTTTATTTTTACCAAA
CAAGAAACCTGCAGCTGAGTGAGAATTGCCACACCAACTACATTTTTTGC
TGCCTTAAAGGTGGTTAAATAATATGTTGTCTTTTCTTGTGGATAATAAG
AACACTTTCTACAGCATTATTCCNTCACCTAAAGGTCTGTCTGATGGGAA
CCACTAGTGAAAGTTGTACTTGATGGTGGAGGTCTGGCTGGGTAGGACAT
CAGCCACCAGTGCTAATGGTTCTCTGCTGAGAAAATCACTCCAAAAATGT
AAATGCTAAAGAAGATGCATTTTAGATAATCTTAGAAAATGAGGGAGGGA
TAAACAAGGCAGCTGGGACTCTGTGGCATTTTCTGATTTGTGTAGGTCCT
GTTCCCCTCTTGTTACCAGCATGTGTGCAAACAGTGGCCATGCATTTTGT
GCTGATTAGCCTGACGGTTCGAAAGATCAGCTTGGTTTGACGTGGAATGG
AGGATGCAATTAGGAAAACAGGACCATATGTTATAAGGACCTTAGCTGGA
TCATGAGAATGGAGGGAGATGAAAAGTGTGTTCCAAAGTCTCAGTGAAGT
GATTCGTTTAGCAAACAGAGGCTGTCAAATCTTGACTGACTAGACAGAAG
GGCTGCTGCATGTAGTTATTACTGCAGAGGATTTGCAGAACATGATGAGC
AAATGGCAGATAATTTCACAAAGCAAAGACAAGTAAGTTAACAAAGACAA
AGTCATCAAGAGTGTGCTTGAACTGAAAACAGCATTGTCATGGGCACTGG
CTCTCTTTAGCTACAGCACTTAGAGTTAATAAATAACACTCNTTTAAGGA
GAGTGAAAACCTGCAAGATGCAGGTAATTTATAAATGGTTTGGAAAGTGA
AGATCAAACTGATCTGAACTTTCCACACCAGTTTTTCTAGTGGGTTTTCT
TACTAAGTTTTCTCTCTAAGTTTTTCTTACTCAAGATATGTGATCCTGCT
TGTCAGAAGGCTTCTTCCCTTCCCTTTTCTTGACAACATTTTTGAGAAGT
GGAAAAAAAGTGCCAAGGAACTCAAGAGCAATGTGGTCAGGCATAGTTAG
AAAAGCTTGTCTTCAGAATCCATCTGATCTCAAGCCTTTTTGCCCTTGTC
TGTATCACCTTGTCATGCCTCTTCTTTCCCCAAAATCAGGGATGGCAGCT
GTATGTAGGTGCCTATGTGAACTGCACATCGTGTAAACCTCTGGNCATAA
CTTCTGCTCTTCTCAGACACTTTTGGTTGAGCTCCACAACTTTTTCTGAT
TTACAGCACCCATAACTGGGTGGTTTTCACCATTCTGCAGTTGTGCAGAT
GATTGTTCCTGTTTAAGCACAAAATTAATTCCTACTGATTTTTTTCTCCT
TTATTTTTTTTTTCAGATAAACTCCACCACTCAAGATCATCTTGATTTTT
TTAAAACTTGTTTTAAAATGTTCCAATGTGTTTGCAGTTCCCTTCTGCTT
CATCTTAGGTGTAAATTTTATAAGTGTGTGCTCTGACCTTCACTGGTCAC
TAATAAAACTTATCCTTACAGGAAGCTGAGGATGCTGCAGCTCTCTCAGG
AGCTGCTGCCAGGTCTGACTTGACACTTCAGCCCCTCCTGCCTTCCCTCT
CAGTGTGTGTTTGCTGGCAGTTTTTCACTCTCCATCCTAACAAGCTCATT
TAAGTTGCGTTAGTGTAAGAAAAGTGCATGAATGTAGCATGAGTCCTTTA
CTGTGGTATAGGAAAATAGTTGACACAATTGACAGTGAAGAAATTTGTCG
CAATTGTGTCACAGTTCTTGATGAACTTGTGTTGGTTGTTACCCATTTCC
CTAATGTCTTCTGGGTACTTGCAATGACTTAACTATTTGTTCTAATTTTT
TTTAGGAGAGGGGTTAAATTGGCTGGCTTGTAAACCTCTGACTCTTCTTT
TGTGCTTTTGTTTGGTTTAGGTTTTTGTCTCCCCAGGCCTTGTGGGTTTT
TATGTTTTAAAGGTCTTTGACATTTTCCAGTTTTCCTTTTCCTCACTCAT
TTGCAATGCATTTAAGCTGACAGACTTGAAGTCAGACAGAGCCACTCATC
ATAAAAGATTATGTTGTAAAACCTTTTCCAAGTGTGCACAATAGATTCAC
AAATGTTTCTCAAAACCTACATGCTTCATTTTTCAAAACATCAACAAAAA
ACAACCATTGGGAGGCAGAGAAACACAAACACTTCAGAGAAAAGATGAAA
CCCACAGAAGATACTGGTTTGTTGTAGTATTAACCTGCTTTTGAAAGCAC
CATGGTGAAGCCTTCTATCTGTGTTACTTCATCTTCCAGTTGTGTTTTGT
TCATGTATCAGAGTTTGTGAGCAGATCCCCTCAGTTTTTTACATTTTTTA
AAATTATGTTGACCTTAATTGCTAAGTCATATTAATGTAGATAGCTTTNA
AAAATTANTTCTATAATGGTATTGAGAACAGTTAATTCTATAATTAATTG
GAACATTTATCCATCATTACTGAGATGCAGAAAGAATTTAATCACAATGA
ATGAGAGTCCTTATATATGAATGGNTGTTGAACTTGGAGAGTTTGGTCTA
TGAAAAAATAAGAAATAATTAAGGAAAAACATACATGTCAACCAGAAATT
TTGTCAATGCTTTAGAGGTGATACAGGCTTCTAAATTTCTCCCCATCTGC
AGAGGAGAATATTAACAGTATTCTGGAAAGACAAGAACACCAAAACTTCC
TCTTTGTTATATTATGAGACTAGATTCAACACTGAATTTTTTTATACCTG
GCAAATTCTTTAGTTTGAAACTCAGTAGGCAACGGTGTCTCCAGTTTCAC
TTTAAATAGTTTAAACACTCCATGAGTAACTAAAACTGAAAATGAACAAA
AGATACAGCAAACCATGATATGGAAATGTTTTATTTCAGCCTTCTGAGTG
ATTAGAAGATGCCTCTGTCTTCTTAGAGANCTTTATTTTGGCAAAGAGAT
AAGAATTTAACAGATGGGTTGTGAAATTGTTAATGTATGAACTGTACCTC
TGNTGGACTCTGTGCCCTTTCTTTCATGACTGTCACCTCTTAAATATATG
TGACAGCAATAACCCTGAGTTTGGCCTGTGTTTTGCAGCTGGAAGTGCTG
TGCTAAGAACAAGCTTCACAGCTGGGTGGAAAGCCTGACCTTGCTGTCAT
CCATGGTTATGTGCTCAGCAACTTCACCAGCTCTCACTCTTACACGGAAT
AAAAAGGAAAAGAAAAAAGGCAAATTGCTGAAAACCTCTCAAAACTCTTT
TTGGTCGCTGGACAGTAATTTCCAGTGAATTATTNGGTTCAAGGACAGCC
NGTATGGGAGCAACCCAGCCTCATGTACACGGAAGGGGGTGGGACTGGAT
GCCTTTGAAAGGTCCCTTCCAACCCGGCCCAGCCCATTCCATGGTTCTGT
GGTTCATGTCCTCGAGATGTAGTGACAGTGCCCTGGTGTCCCAGGAAAAT
GCTGAAGTTCCAGTGCAACCCACAGGTGACCAACAGCACAGCATGACTGT
CCCAGACCTTCATCCTTAACCATGTACACCTTCCATCAGTTTAACTTCAA
AAGTTGCACTTTTCTCTCAGCAGTGTGTTTACACTGGCATAATTGCCTCC
ATAAACAACAGAGCTGTGTTGACAAGGTCCAAGGGTTCCCACAGAAANTG
GTTTTGCTGCATTCCCGATGCATTTCATATGCTATGTTTCTTTTATTATT
TTTCTTCTCTACAAAATGACAGCTTTTGGGTTTTTCTGATGCACGTTTGA
TGATGCCGCCATGGATGTGTGATGGAGCTGATGCCTCCCCCCTGCTCNTC
CTCCACGAACAGCAATGATGTTTGACTACCAAGCCACCGAACGAGGGAAG
GAAAGTGTCAGCCAGGATAAACTTCATATTACAACAGGAAGATTGTGAAT
ATGAAATAACATCACAGTTGAATGGAACAGGCTTGCAATGGGGAAACACC
TGGTTTTGTGCAAAAATCTCCGTTTTAGTCTGAAGCAAAGCATGAATTAT
CATTGCTAAGCTGCCTTAANGCAGTATTTCTTGTATATTTTAGAGAAGCG
ACTTTAAAAAGTGTTGCTGTGTCTGTGACCTCANAGGCAGCTCCCAGGGT
GGAGGGCAGGAGGAGCAGCTGTGTTCCCTTGGAGTGAACACCCCTGCAGC
AGAATTTCCACTNCATTGCTGTTTTTCATGAGCCCCTCTGCAAACTTCAG
ACCCAAACCACTCTGAAGCTAGAGGAAATTATTCTGTGGGCTTCACTTTA
CTTTGCTGCTGAGCCTAGCAGAAANCCAGGAAAGTTTTGCACAGAGGAAG
GATGTAGGGGTTTTGGTACATTGAAGCTTACATCATNATATTTGGTTTAT
TTATTTTGTTGCCTNGAATATCAGGTTAGAAACAGGTAAGTCATGCTGTC
TGCAGGGCCCCAATGAAAACACCTCAGAGAAATTTTGTTTTGATGGACAG
AGTAATTGCTGACTGCTTCAGGCTACTGATGTACCCACACCTAGATCACG
AGTGAGGCAGGGGATCTTTGCACAGCACAGTCCCATTTGTAGTTAGTCAG
TGATGGGGTATTGTTTTCTGCCTTTCTTGTATGTACAGAGTGATTTCTGC
CTCACTGATGACTGTAAACATCATTCTAAGTATTATTTTATGATCCCTGT
AGGAATAACAATGTAAACAGCATAATTATGTTCACCTTTGAGGCATACCT
TGAAACTTTGTTCTTCCAGAAGAGCGGTAACAGAAATGAGTACTGTTGGC
AAGGTAAACAGAGAGCCACCACAACCTGCTTGTTAGAGACAGCCAATGCT
TGAGGGAACTANGCATTCAACACCATGAANAAATAAATTTAAAAAAAGAG
TGTTATATGNTTATCTCAAGATTTATTCATAAATGTATTACTACACAGGA
AAAAATACTGAAAGCAAGATATTTTGAGATCTTTCTTCTTCTGAAAGAAG
TATGAATACTTACTACTAGTAAACCATATTTCTCTGGGTAATTATTATGA
GTCCCATAGATCATATGCATATTTGTGTCTATTTTTGCCCCCATTTTCCC
AGCACTGGCAGGGTTCCTCCAGGGTTGATCTGTTCTTGAAAGACACTCAC
TATCTTCAGGCTTCAGCCTGTCTTTGTTTGAACAATGTATAGCAAAGCAT
CCTGCCTTAGACTCCCAGGCTGTTAGCTCTTCCCGGTGAGGAAACATCAG
GAATATTTCCTATCTCTTGGACTCTTCAGTGTAACAAAATTAGATACTTT
TTCACTGCACGTATTTCCCAAGGGTTTTGATGCTGAAGATAAACCTGCAG
CTTTAGGAGTCACAGAGCATAATTTAAGCATTTGCTTTAGATTTACCTAC
CACAAAANATATGATCTGAGGTGGGGGNGGAGAAAAATAACTACAGTTCT
GAGAAAGTTCTCTACAGATTTCTCAGTTTCTATACCAAGCCTGGAATTCC
AGAGAGATTCTAAATTGTGCTTGTCCATCCGTTGTTCTTTCACAAGGGTG
GTGATTTTGAGGATGTTTCTTCCAGGGTTTAGTTCTTACACAGGAAGAAG
AGGAGGACAGGTCTGTGCTGCCTCCATTCCTTCTGGGATGCAGCCAGCTC
TGCTAATCCAAAAAGGATAATTTGGGTCTGAGAACGTATCTGTCAGAGCA
CATTGAGTCCCAGGGAATATCAGGAGAGGATAACAGTATTTTATCTCGTG
TTTTCAAAGTGCCCCACAGCATATGAACTCAAACACTTCTGGAGGGTGGG
CTGATCTAACCTGGCCTTCTGAAGAAATTAAATTCAGGCTCTTGGTAAAA
TAGGAATAAAAATGGGAGGAGGAAAAGGTGGGGGAAAAGACTGAAAGCTG
AAACAGTGGCGCCAAACAACATAAGTAGAAACAACCTCAGTTTCCACAAA
CGACAAGATGAGATACAGCTTTTGCTCATCAGAGACCTGTGATTTTACCT
TCATCTCATATAATCATAGGAGTATTTAAACCCTCTTTTTATTTATGCTA
CGTTATGTCTCTTGCTGCATCATAGTTATTGGCTTGCTTTGGATATAAGA
TGAAACCAGTTTACTTGAATAATTATCTGAGGCCAGAGTTCTCTCTTTTT
TCATATACCAATTTCTGAAAAGAAATGAAAGAAGGAATTAATAACGCTCT
TGTTTCCAAGAATAAATCTCATGGACAATTTGCCATCTGAAAAAGTTCCA
GTATTTTAGCAATGAAAATATGGTACATATTCATGTTCATAGGAAATATG
TACAAGAACCATACAGAAATTTCAAAGGTTACTCTGCTTAATATGTGAAA
TTAACAGTGAAGATCATTTTTAGTCCCTCTAGCATAAAAGTCTAAAAGCA
GTGACGAGAGAAACCCAGGAACTGTAGAAGCTGATTGAAAGTTTCGCTTC
CCTACTTTGCTGTTGGAGTGGGATCCACATGTGTAAGCAGTCAGTATTTA
AACATGCATATGACACCAGAGCGGTACAGTGCATGACCTTTTTTTTTTTT
TTTTTTCCTTAAATTCTAGAGGGAAGTCATTAATAAGAAAATANCAGGCT
TATGAGATTTCATAAGAGCTTCCAAAGGCAATTACCCTCTTGGTAAATTT
ACAGACAATAAAAATAATCTTTAGGAAAATAATTGAGGACTCTGTGTTGT
AAGTACACGTTTATGGTTGATTTTGTGCCACTGCTTTATCCCATCAGAGG
AGAGAGCTAATTTTCTGAAAGTATTAATTTATTAAGCATCCATTGGTCTC
ACTGTACTCTGTTTTCATATCCACACATGCAATCCCAGTGAAGTCAACAG
CTTCATCTAGATGTGAAAGATAATTTGATCCCAGTAGTGATTCCAAAGCA
TAGTAGAAATTAAATAATTCCAAAGCAAAATAGAAATACTGCTATTTGTC
TCTACAGTTTTTAAAGTATAACCAAACTAATAAGAAAGGATGCAGAGTCT
AAATTCAGTTTGATTAAAGCTTTAAACACTGATTGGGTCCAGAAGATAAT
TTAGAGGCAGGCACAGAGAAGTTTAGGGCTGGTGAAGGCAGAATGAGAAG
GAGAAGAAAGCCTCAGGAAAAAGCTGGACTGGTATAATTACATAAGGGTC
CAGGGTTGATGATATGTGCTGTAAAATGCCTGCATGCAAATAAGCACAGT
AACTGCTCAAGCATTCTTTTTTTCAAACAAAAGAAGACACATGGTATGAA
ATGAGGATTTGTAATTGCACTGTGGGACAGAACTGGGGCGAGGAGTCTCC
TCACAAACACAAGGAGCCAGCCCTGGCTGTTAAGCAGCCCTCACCATCAT
TCATCCATCCCCTGGAAACTCGTGCTTGATTGGCAGCCCTTCCCCCTCGA
AGTACTGAGTGAGGAAAATCTATCAGCTCACCTGTTTGCTCAGCTCTGCA
AAAGCTGCACGGGGAGAGCCAGGCTGATTTCATCCCCTGCTCTGGGACAC
AGCAGCTCTGTCTTTGTTTTCAATGGATGGGGCCAATTAGAGCACCCTGG
ACAAAGGTTTCTCTGCTCTATGCTTACCATGACTTATAAGAGTGGTGTTT
TTCTGTATCAGAGATGGGCTGAGGCTTGATATATTTANGGGAAGTTTAGA
TGAACAATTCTCCTCTAATAATCGTCTTTAAAAAAACACTGAGGTGAGTC
AATCCGGTGGTAATCTTTTGCCAGCAAATTTCCTAATTTCTTTGTAGAAT
TTAAGTGCCTCTTCTTCATTTCCCTGTAATTTATCAGACAAAATGGGGCA
ATTATGAATAATAATGCAATGCAGATTCAATACAAGGAAAAATATTTATG
AGAACTCAAAAATGAAGCTAAAATCTCATAGTGCACTTTTTTTTGTAATT
TAATGAAAAAGAAGTTGCATATATTTTCAGGAAGAAATAAAAATAATGTT
AACAAATAACACTTCTACTTTGTTCTAAAAATATCTATCATTGGCACAAG
TTTAGGTGAAGCTATGTAGATGCTCTTCATCATAAAAGGCTGAACTTAAA
TCCAAATGGGATCCACCTTTCTTTTAGATTCTCCAGATCTGAATGTCCCA
CTTATTATTCAGAACGCACAGGCAGCCGGCCAAGGGGAATATCCAGAGAG
GTCTGGGCAGGTCCCCAAGGTGGGAATGCCAAAACAACAGAGGGAGCTGT
GGAATGGCTGAAAAATGAGCGCCCATGTCCAAAGAAGGGTCCCAAAAGAT
CTTTTTTTGGGACTATAGACATAGAGTAAAGCAATATCTGCATAAGGTAA
AAAATCTCGCCTCCAGTGACTCAGAGGGTTGATGAGTAAAAGTCAGTGAA
CTGATGCAAATTGGGTCATGGTAATTTTTGATTTTTTTTAATCATTTAAC
AATGAAACCACAGATCCATGAAGAAATATGTTTCTTCGGCCAAATCTATC
TAAACCTAGACGTATTCTTCAGTCTTCTTTTTTTTTTTCCCTGCACTCCT
ATGTTTTTCTGAGTATTTTTTCTATGGGGATGGGAATGCTGGGTATTTCT
GGACAGAGCATTTGTCAGTGGTAACTGAAGCCTGGATAATGTGAAATATT
GCTCTTTTTTTCCTGATGATTCTTTCCTGAATATTTCACATGGTCAAAGA
TACATGGAAAAAAGGAAGTTGGCCTTGCTGTTAATGTAATTATATGAGAA
GAAAGGTAATCAGCTGTTTTCATGCACTCTGATAATGAACTACAAGCTGT
GAGAAATCTGCTTGCATAATAATAAGAAAGATGCACAATAAACACTGAGT
GTGATCAGTTACCCGAGTACATTTGTATCCAATTTAGCATCAAAGAGTGA
CACGATCCGAATATTTGGTCTGTCTGGAGCCTGGAACAGAAGTATGAGTG
AAAGAAACTCAAGTGCATTCTGGCAAATGCTACACTTAATGCATTTGGTT
TATAATATAAAGCCTTGGAGGTAATTAGCAAATGAAATCCTGATAGCAAT
ATGTGCATGACTGCCATTATTGTTAATGTTGAACGTGTGCTTAACACCCT
GAGCTCTCTACAAAACTTTCTTGAAGTAGTTGCAAAAAGATGTCCAAAAT
GCTGCAGAGCCTAGAGTAAAACGACTGCTAATGTCAACTAATGTGTGCAA
TAAAGAGAGCATACTGCTTAGGTGATGTTTTTTCTGATTCTCGTCTTTGA
AGAATAATTACTAGTCTTGAAGACTCAGTCAGCAGGCACTGCACTACACA
GAGCACAACCTGCTCTGTGATATAACTGAATAAAATACCTTCTTATGAGT
CAGATTCCTCTAGCCATAAAGCTGGTGAGAGAACAGGCTTCAGTCATTGC
TCAGAGCAGAATATTGATGCATTGGTGTCTCTCTACTTTACACGCAATCA
AAGTCTAAAATTCATCATCCTTTGATTGCTGCTCAGTGCTGTGGACAAAT
CTTTAAAAAATCTAGGAATACTGTTGAAGAAGGGCAAAACTAAGAAATGA
CAGAGCTGGGAGTAAAAAATTTGACATCTCAGGGAAAGGTCAAGAAAGTT
TTGCAATTATAAATAACCATAGGATGAGACATATTACATACCTGTCTTAA
TTTGCCTGGCTTTAAAAGGATGCGGGTTTGTTTTTTTTTTTTCTGATGCC
ACCTCTTGTTGAAAAATAAATTGTGATTGTCACTGCTTGGACAGTGGCAA
TTAATCAGTAATTATTCTGCTGCCTTAGGAGTGTCCAAGCTGCTTCCCTG
TCCTGCCAGGGGCTCACTGCATCAGCCCTCATCCTCACAGTCCAAACTCC
GATNAGCGGCTCTCTGAACCTCGACGTGGTAACCATGGTGAGCAGGCACC
TGAGGCAAGTTGCAACCACTATTCTGTATCCTTGAAAACAAAACCCTAGA
GAAACTATTTATTAGGTTTTACTGAAAATACCAAGCAGCAGAAAGAAGTA
GGGATAAGGGAAGAATTATAACCAGAATGGCTTTCATAATGGAGCATTCG
ATATTTGGGAGCACGGGTAAAAAAAGCCCTGGTGGCTCTTTCTATTTACT
TTCCCAGAACTTACTATTTCAGAGTTATTCCTTGTGATCAATACCAGCTG
CAAGACCCACAGAGTAAATCCGATGACTGGTGTTCAAAGTCTTGTTAAAT
GGTTGGGTGGTGTTTTTTTCTAGCTGTTCCTCAGCACGCAAGCCAGGTTC
TGCAGGAGCTGCAGCAGGGAGAAGAATGATAAATGCAGAGCAAGGCTTTG
CACATTGCTGAATGGGAGAAGGACCAAGGGAAGGCACAGACTGGAATTTG
GTAGTGCATGGGTGTAATGATTATGTGCCACAAAGACGTAATTAAATNAA
GGACTGTTTAGCGAAGGAATAAAGATACGGAACGTATCTCCACAGAACAA
ACAGGCAAGGAATTTGCATAAAGCTCACGTTCCTGTGAAAATNTTCTTGC
TACTTCTGTGCAGCAATGTGCACTAGAGTGAAACAACAGAGAGCAGAATG
GTTTGTGAATGCTCTCAGGTCTCACCTGAGACATNTTTTCAAATGTGTTC
GAAAATAGATGTTCTCATGGAATAGGCTGCATGTCCACCCCATGTGAGGC
TACCTGAAAGTTGCCTGAAGTACATAACATGACTCAGTCAAGAAATTTCC
AGGTTATAAAGCTGAAGTTCGCTCCAAATGAAAACACTCTAACACAGTTA
TGGAATCAGCAGTTTCTTTATGCACAACAGGAAGAAGTAGTTCTAAGCAA
GGCAAAGATCTAGAAGATCCTTAACAACTGTTCATTGTCACTAAAGGTGA
CATGCATATAGAAATTTAAATACTGCTGGAAAAGACTCATCTGAAGCACC
CCCCCCCACACACACACACACAATGCACACAGACTGAGCTCACGAAGGAA
AAATATACTGAGAGCACAAAGGGACTCTAACTCACATGAGATCAGCACGT
TTCTTTTAGTTGGGGGATGAATATTTTAAAAATGAAGATTCACCCTAAAC
TTATTCAACACTTCTGTGCTTGTACCTTATTATTCATGGCTTATTAAACT
GGTTAAAGTGGTCAACAGGCACTGCAAATGCCTTTACTTTAATGTTGCAT
GTTACATTAGAAATGGCTGAATAAACTTATCTAAGACATTTAGCTGTGTG
AAGTGCAACCCTAAAATTCATGTAAATGGGTTTTTAATAGTGGTTGATAT
GTTATGACTGTGATGTACCATAAATGTTATGCATACTACTTTTGAGGTAT
TTACACATTGCTATATTCCATCTATGGTACTGATGTGTTTATTAAATTAT
ATAAACAAACATTAAAATAAATGTAACAGTCAAGTATAAAGTTCCCCCTC
AGATCTGCACAGCAGAAACCAGTATGGATATTCCAGTCCTGTTAAGTTTG
CAGGGCTCTCACTGAAAGCAGAAAAATCAAAACTACAGTTCAAACAAGCA
GTAGAGGTGTTGGGATGTTTATCTGGTTTCTGTTGATGTGGAAATCCAGA
ATGGCAGATTTGCTTGTTTCCATATGTCTCAATGAAATCAGATAAGATAG
AACTTGAATTTTTAAGGCCAGTTTTTGATGGATGCAAAATTCCTTGTGCT
GGGGCAGGCATTTCAGTAGATCTAGGCTTGTTTATAAATAATATGGGAGC
CATATCAATAGTGAAAATTCTATGTTTAAGCTTAAGTTGTCTAANAGTTC
CCATAATCAACATATAATTTTCAGTTGTTTGTAACTCCCCACATTTATGT
TTGCTTCTGGCTACATAATTTAAGCCACATTACTTTGATTTAATCTCCTG
CTATGAGAGCTTGGTTTTTGTCAGCAGATCCTCTTGTACCAGAGGTGCTT
TTTGCTGACTTTGCAATCACAAATTCCCTAAAGGTGAAATCTTAGCAAAC
TTCTGCATGTGTCCCCCAGCTTTGCAGAGAANTCTTACAGAGCTTTGCAT
GAAGCATGCATGGTCCATACTTCCACTGCTCCTGCTCGGGGGTAACAGCC
TGTTCATATTTCTAGTGGAAGGTGTCCATGGCCTTGGCAGGGGTTTGGAA
CCAGACGACCTTTAAGGTCCCTTCCAGCACAAACCATTCTGTGACTTTCT
TTGGACCTCCAGCTGCTGGAGCACTCAAAACCCTTTGCATTTGGGGGATT
CTGTCACAG
>oenMel6-13122#Unknown
TCCACCCCTCGCCTCTGTGAATCACATATTTAAGAATTATCATTAAAATC
CACATTCATCACACAACCTNCACTCACATCAACAAAAACAACCAAACAAA
ACAAGACAAAAATTCCCCACACNAAAACCAAAATAACATCATCACAACAC
AGAACGAAAGTGGACAATTTACACAAAATCCACCCCTCGTCCCTTCACCA
CAATTACAACAAAAATTCCCCACGATCATTCTGCATCCACTTCTACACTG
TTCAGTNCNTGTTTTGCCCGTTACCTCTCCCAGTTNCTATCCTTATCTCA
AAATCCTCACGNTCCCGGGTTTTGGCGCCAAAAAGC
>oenMel6-9108#DNA/PIF-Harbinger
TCTGGCCCCGATCCAGCAAAGCACTTAAGCACATGCTTAACTTTACTNCC
ATGGGNTTGTTCACGTGCTTAAAGTTAAGCATGTGCTTAAGTGCTTTGCT
GGA
>oenMel6-11206#LINE/CR1
TCTGTGGCTNGTGCCNCCGCCAAAATCTGTGGTGTTTGACAATGGAATGG
CCTACGCAGCACCAGGCGTGCTGGCATCAGACGGGACTCACCTTTCTCAG
CAAGGGAGGAGAGTCTTTGCTCGGGAACTAGCGGGGCTCACTGGCAGAGC
TTTAAACTGGATGTGACGGGGGAGNAGGACAATATCAGGCTTGTCCCTGG
CAAGCTGTGGGATGATATGNAAAGGTTAGAGGGACGGGGTGCTAGCGAGG
GCCCTCNGCCGGTGACTCTGAANTGTGCTGGCCACACTGGAGCACACCTG
CAGTCTTACGGAGATGAGCCAGGGACTCCTGAGGTAACAGAAGCCAACAG
GGAAACACCAGGGAAATATCTCAAAGGAATTAAGGGGTGTTCCTCTAGG
>oenMel6-20185#Unknown
CCCTCCTCCCAGGGGTTCAGCTGTCTGTGATCCAAGGCCCGCTCTCGATA
CAGCACAGCTGCGTAACCTCGGCTAGACTTCTGAGAAAATCGCTAAGNCG
TGAGAAAGAGCCGTGAGAGAATGCGCAGANTAGAGCCATGGAGATAAGAA
AGGTAAAATTACAGACAGAGGTAAGACTGTTGAGATAGAGTAGTCAGTAG
CTCAAGGATTCAAGAAAAAACACCGACATGAAAAGGTNTAAAATCCTAAT
GAGAAAAAAGAAAGGGAACCAGAAGATAGCAGCTCAGCAACCCTGAGGCA
GAGGCCAGCTCTCCGCCTCCTGAGTGATGACTACNTGNCCGCCTACTGAG
TTGACTCANCAGGCAGNGGGGGCTGGTTTAATNCCTAGCTCATTAGTCCT
ACAATGTATTTTGTGTNACACGACAAATAATTGNTTTGTGCTTTTAGATT
GTNTATATCTTGCCCGCAGNACCTCTTATACACGGTAAAAGTTCCCTGAN
NAGAGTGAGTCCCANAGNCGGAGGNTTGCATAAGTAATCCGGNATAANAG
ACATAGTANTANTGTGATTAGTCANATAGATAGAAGCATTTATA
>oenMel6-21030#LTR/ERV1
GACCGAGCCCTTGTGTTCGCCCCGCCCCATTCCCCTCTAAGCCCCGCCCA
TCTCCTGGCCGGTTCTCTCCGAGCATGCTCAGAACACCCGNNAGTGCCTC
CTGTNCGCCGCCATCTTTGCTCCCGGTCCCTCCGTCCGGCTCCAGCGTGT
CCGAGAGCTGCGGTGGGGCTGGGGGGGGTCTATAGGGGATCTGTAGGGGA
TCTGTGGGGGATCTATAGGGGATCTGTAGGGGATCTGTAGGGGACTGGCG
GGCTTTAAGNCCATGGGGGATTTCTGGGGGTCTGCAAAGGGATTTGGGGG
CTCTGTGGGGTCCCTAAAGGGGGTCTGGGNGGTCTATAGGGGATCTGTAG
GGGACTGGGGGTCTCTGTAGGGGATCCGGGCTTGTCTATAGGGGATTTGG
GGGGGTCCNTAGGGGATTTAGGGTCTGTAGGGGACTGNGGGGGTCTTAGG
GTCTCTATAGAGGATTTGGGNTTGTCCGTGGGGGNTTTGGGGGGTTCCCT
AAAGGCGCTCTGGGAGGTCTATAGGGGATCCACGGGGGCCTGGCGGATCC
TATAGAGGGTCCGGGGGGGTCTCGGGGTCTCTATNGGGGAATTTTGAGGT
TCTTAAAGGGAATTTCTGGGAATTTTGGGGTCTGNACAGGGAATTTTTGG
GGTCNCAANGGGGATTTTGGGGTTCCCGCTGAGAATTTTGGGGTCCTTAN
AGGGAATTTGGAGGTCTCTTGGGAATTTTGGGGTCCCCATAAGGAAATTG
TGGGGCAATAAAGGGAATTTTTGGGNTTTGTAGGGAATTTTGGGCTATAT
CCATGGAATTTTGAGAATTTTGGGGTCTAAACGTGGGAATTTTTNGGTCT
CTATTGGGAATTTTTGCAATNTTGGGGTCCTCAAATGGAATTTTGGAGAA
TCCCATAGGGAGTTTTTGGGGTCTNTATAGAGAAACNTGGGTCCGAACAT
GGGAAGTTTGGGTTCTCTAGAGGAAATTNTTGGGACGTCCGTAGGGAATA
TTTGGGAATTTTGGTTCTAAATGTGGGAATTTGAGGGGGGAATTTTGGGT
GCCGAAATATGGCAGTGAAGAGCTGGCATGAAGCCTGTGAGACCCAGGGG
TCATCCCAAAGACCCCCAGACAAACAGCAGAGCAACCTAAAAGGAACAAT
GTGCAAAGAGGCGTGAAACTAATTTCCATATGGAGCGANGAGGGGATGGA
TTTGTATGAGGCGAATTGTGTATTCCTGGTTTGTAGAGAATAAAAGGAGA
GGCGCAGGTGGCCACAGNTGTGNGTGTTTTTGGAGGAGCTGTCCCCCACG
CGCCGCAGCGCTGAATAAATACACACCTACTCTTAGAACTTCTTTTTGNG
GGTTTTAGAGTGTTTTTCTGTGCTTCACCATGACCCCTCCCCAGACCTTC
CCCGGCCCCTCCCAGGACCCCCACGACCCCACCCAAGACTCCAAGACTCC
TCCTCAAAGTCCCTCCAGAACCCCCCCAACCCCTCCCAAAACCTTCCAAG
GACCCCCCCAGCCCCCTTCCAAAACCCAGCCCAGGACCCACCACGAGCCC
TCCCGAAAACGCCCCCACGACCCCTCTCAGGACCCACTGACTACCCCAGA
CCCCTCCCAANCCCCCCCACGATCCCACCCACGACCCCCCTGACCCTAGG
ACCCCCAGACCCTCCCAAAGCCCCCCCAGAACCCCATCCAGACTCCCCCA
AGACCTCTCCCCAAAGCCCCCCCGGACCCCCCCAGNCCCCTCCCAAAAGC
CCCCCCAGACCCCCCCAAAAACCCCTCCAAGACCCCTCCCAGAACCCCCA
GACTCCCCCGGGCCCCTCCCGGATGCCCCCAAACCCCCCCGACCCCTCTN
GGACCCCCAGACCCCCTCCAAAACCCCCCAAGGACCCCCCCAGACCCCTC
CCCAAAACCCCCCAGANCCATCCCCAGTCCCAACCCGGGACCCTCCAGAG
CCCCCCCAGATCCCCCGAGGCTCCCAAAACCCTCCAAGGACCCCCCAGAG
CCCCCAGTATCCCCCCACAAACCCCCCAGACCTCAGCAAGATCCCCTCAG
GACCCTCCCAAAACCCCCCCCAGGACCCGCCCGAGNCCCCCAGACCCCTC
CCCAAAACCCCCCAGANCCCCCCCAAGGCCCCTCCCCCAAACTCCCCCCA
GACCCCCCGAGAACCCCCCCAGACCCTCCTCAAGACACCCCCAGAGCCCC
CCCAGACGCCCCCCACCCCCGCCCCGCCTCCCCGCCCCCGCCCCTCCCCC
ACCTGTCCCTGCGCCGCCCCAGCAGCTCCCGCAGCCCCTCGTCCTCTCCC
GGCGCCCGCCCCGCTCTCCGCAGCGCCTCCCTCAGCGCCCGCCCGAGCCC
GGGGAGGGGCCGGGGGGAGGGGCCGCCCTCTCCGCGNCCGGCCCCGGGGC
AGAGGGCGCCACTCCCGCCTGGCTTCTCATTGGCTGCGGCGCGCGGGAGG
CGGGTGTTGCTGAGGGGAGCCGCGCGCTGATTGGTTGGTTCGGGGAGAGG
CGCGCCGCTATTGGCTGGGAGGGGCCCGCGCGCGCGGCGGGGGGAGCGTG
AGGGGAGAGCGGCTNGAGGGAGCTGAGGTAGGGCCGGGGGGAAATGGGGG
ANTTGGGGGGGAATCTGAGGGGAATTGAGGGGTCTGAGGTGCGTTTGAGG
GGGTCTGAGGTGGGTCCGGGGCGGATTTGGGGGAGTTTGGGGGGGTCTGG
GGGGAATTGAGGGGTCTGAGGTGGGTCTNTGGGGGAANTGGGGGGGTTTG
AGGGGGGGTCTGAGGGGAATTGAGGGGTCTGGGGTGCTTTTGGGGGGGGG
AGGGCTTTGGNGGGAAATNGGGGATCTGAGGTGGAGCCGGGGGGACATGG
GGGAATTTGGGGGAGTCTGAGGGGAATTGAGGAGTCTGAGGTGATTTTGG
GGAGGCTTTGGGGGGAAATGGGGGGATTTAGGGGGGATCTGAGGGGAATT
GAGGGGTCCGAGGTGGGCCTGGAATGGATTGGGGGTTTGGGGGGCTCTGG
GGGGAATTGAGGGGTCTGAGGGAAATTGAGGGGTCTGAGGTGGGTGCCGG
GGGANTGGGGGAATCTGGGGGGGTCTGAGGGGAATTGAGGGGTCTGAGGC
GGGTCCGGGGGGAAATGAGGTGATTTGGGGGTCTGGGGGGAANTGAGGGG
NCGGGGGGGGGTCTGGGGGGAAATGGGGGGTCTGAGGTGGGNCCGGGGGG
ANTGGGGAAACTTGGGGGGGT
>oenMel6-885#LINE/CR1
CATTTCNAAAAATTATAGTTGACAATTTCCTAACTCAGAAAATGTTGNAT
CCGACACGGGAGAATTCTGTATCAGACCTCATCTTGACAGATAAAGAGGA
ACTGATCACAGAACTAAAAATTAGCGGTANCTTAGGTGNAAGTGATCGCG
ACTTGATTGCATTTGTNACGCGCAAACAGAATANAGCCAAAACCANTAAG
NTATACACTTGGTGCTTTAAAGAGNCAATTTCACAAAGCTGAAAACAATT
ATGAGCCAAATCAGTTGGGAGAAAGAATTTAAACGGAAAAATGTGAACGA
TAATTGGGAGCTGTTTAAGAACATTTTACTAGATGTCCAAAAAGCCACAG
TCAGTGAAAAGGAAGGTCGTACTGGTTAAAAACTCAANCTGGCTTAGAGG
AAGTCAGA
>oenMel6-3596#LTR/Ngaro
GCACAGGTGTGCGCGCGGGTGTGTACAGGTGTGTCAGGCGGCACAGCTCG
TGCCTGCAACAGGTGTGCGCAGGTGGCTGTCAGGTGCACGTNCAGGTGTG
CGCGTGTGTGTGTGCGTGCGCAGGTGTGCCAGGCACANGTGTGTGCACAG
GTGTGCCATAGAGAGGCGTGTGCGCAGGTGTGCACACATGGTGTGTGCAG
GTGTGCGTGCNCAGGTGCGCGCACATGCCCAGGTGTGTGGCGTGCANGNN
TAAGCGTGCACACGGGTGTGCAGGCACAGCTGTGCAGGGTGCTCATGGNG
GGGTGGGCGTGCTCAGGTGTGCCAGGCACAGCTCGGGGTGCCAGGGGATG
CTCAGGCTGTCCCAGGGATAGCTCGGGGTGCCACGGAGGGNTGCCCTGCN
CAGGTGTGCCAGGCGNTGCAGCTCACGGGTGCCAGGGGGTCAGNTGTGCG
GGTACAGCTCGGGGTGCCACCCTGTTCAGGTGTGCCAGGCCGAGGGTCTT
GGCCTTTGCTGGAAACCCCCAGGTGAGT
>oenMel6-4956#Unknown
TGTAAGCATTTTTGAAAGAAAGTGAGAAAATAAATTTTAGCTTGACAACA
GCCTCAACCCAAGGCTGCTTCTAATCCTCAGCCTAGGGATAGGGTTGAGA
NTAGTGNTNAGGGTTTGGAAAGCGACAAAGCCCNNANCNNCAGGNACACT
GCAGCTGCNAAAGGAATGCCAAGGNGAACACGACATGGCTCCCTCCACAG
TTTCCGCTTGGCACCAGCCTCAGACCAACGCAGCTTTAACTGCTCAGCCT
NGGGTTAGGNTTACGCCTAGGGTTAGGGTTCAGAAAACCACGAAGCNCGG
AGCTCCAGNNACTCTGCAGCTAAAANAGACATGCCAAGGGGAACACAGGA
CTGCNACAACATGGCTCCCTCCACACCTTTCTNCTTGGCACCAGCCTCAA
CCCCATGCNGATTTNACTGCTCCGCCTAGGGTTAGGGTTACGCCTAGGGT
TGCTTAGGGTTCAGAAAACCACAAAGCCCAGAGCTCCAGNGACACTGCAG
CTGCAAAAGGCATGCCAAGGGGAACACGGNACTGCCACAACATNGCTCCC
TCCACACCTTTCTNCTTGGCACCAGCTTCAACCCCATGACGGCTTTACTG
CTCTGCCTAGGGTTAGGGTTACGCCTAGGGNTAGGGTTCAGAAAACCACA
AAGCCCAGAGNTCCAGGGACNCTGCAGCTACAAAAGGCATGCCAAGGGGA
GCACAGGACTGNNACNACATGGCTCCCTCCACACCTTTCTTCTTGGGNCC
TGCTTCAACCCAATGCAGCTTTAACTGNTCCGCCTAGGGTTAGGGTTACG
NCTAGGGTTAGGNTTATCGCTAGGGTTAGGGTTCAGAAAACNNGAAANCC
CNGAGNTCCAGTGAATACTGCAGCTACAAAAGNNANGCCAAGGGGAANAC
AAGACTTCCANAACACGGCCCCTTCCACACCTTTCTGCTTGGNACCACGC
CTCAACCCACGGCGGCNTTNACTGCTCTGCCTAGGGTTAGGNTTATGCCT
AGGTTGTTAGGGTTCAGAAAACCACAAAGCCCGGANCTCCAGTGACTCCG
CAGCAAATAAAGGAATAAANGNNTGCCAAGGGGAGNACAGGACAGCCCCA
TCATGNCTCCCTCCACGCCTTTCCGCTTGGCGCAGCTCACCNCATGCGGC
TTTNANTGCTCTGCCCAGGGTNANGGTTNAGGAAANCANAAAGCCCAGAN
CNCCAGGNACACTGCAGGTACAAAANNCNTGCGAAAGGGANCACAAGGCT
NTACCNCAACACGNCTCCCTCCACNCCTTNCTNCTTGGCACCAGAGTCAG
CCCAGGGCTGGTTTCTTGTTCCCCCTAGGTTTAGTGTATTTCATAGGGTT
ACACCTAGTGTTAGGGTTCAGAAAACCACCAAGAGCAGAGATCTAATGAC
TTAGAGGTTGCAAAAAGCATGCCAAGGGGGTCACAGGACTGTCACAACAT
GGCTCCTTCCACTCTTTTTGGCTTAGCACCTACTCCCCACATGTAACTTT
TGATGCTTTGCAGGGTTAGGTGTGTACTTAGGGGTAGGGTTCAAAGTACC
ACAGCACCCAGCAGCTCCATAGGGATGNTGTGCTTCCATNTNCAAAAAAC
CNTGCCAGGNAANNCACAGGACTGCCATAACATGGCTCCCCCCC
>oenMel6-5747#Unknown
GGCTCTAATGCTTTTTAGCTGGTGGGGAGTCNCAACAGAAAATTTTGTAG
CTGCGTGTGANTGTGCATGCGCATACAGTATAACGCAGCGGAGATTTAAG
AGAACAATATCGCAAAACAAGAACAGTATCAGGTTATTCATTANCAAGAT
AAGGCTATTTAGTTGTTACATGTTGGAAAACAGAAGAAATNNCCATTAAC
TTGTAAAAGCCTTGTAACTTTCTCCCGTGCATTCCTTTTTGTGCTCAGCC
CGAGTTGCCNCATGNCCGTNTCTGCGAGCTTGGGGACAGCCAGCGAAATC
CCCACGGAGGGCTGCTGCACGGGTACACGAATGCACGAGAACTCTGCAGC
GCATT
>oenMel6-5481#DNA
GGTAACTGTGCTGNCAATTATGGGAAGAGTGGTTTAGCAGCAGTTTANTA
TAAAACAGTCCATTCACAGTTGCTTATAACTNTGCCAAGTTCGAATTGTT
TGGCCTGAAGNTTTCCATGCCAGNTGTCTGCCTCAGGCTGAAGTTTTTTG
GAAAATTTCAGTCGAAACAGTTCAGCNGNTTCTGAGAACGAGGCTAAGGA
AAAATATGTCGTTTTGCTCACGTCAAAAAAAAAAAAAAAAAAAGAAAAAA
AAAAAAAAAAAAAGCCTTTAGCTTTCTTTCNAAAACCNCCTNTGGTCATG
AAATATTCTTCTGAGGATACCTAAGAGGNANGACTTGGNGTTCGCNTGNG
AGAGAGCTGTTTCAATATTCTTC
>oenMel6-4063#Unknown
CAGGATCCCTGNTGGATCAATCAGGGGGTTCTTCCCATCTCCCAAACGCT
CTCNAATCCCTGTTTTCTCCCATTTTTCCCATTTTTCCCCNTTTTTTTCC
CCGTTTTTCCCCCCGTTTCCCCATTTTTTCCCATTTTTCCCCACTCTCCG
CCCCGTTCTTCCCATTTTTCCCTGTTTTTCCCGATTTCCCCCTCCCATTT
CCCCCCCANTTTTTCTCCANTTTCCTTTCCCCATTTTCCCCCCACTTTTT
TCCTATTTTTCCCAATTCCCCGTTTTTTCCCATTTTCCTCCCGTTTTTCN
CCCAGTCTATTTTTCCCATTTCCCCCCATTTTCCCATTTGCTCTTTCCCG
CTTTTCCCCAATTTTTTCCGTTTTTTCCCCATTTTCCCTCGTTTTTTCCA
TCCATTTTCTCANTTTTTTTCCCATTTTTTCCCAAAATCCCCATTTTTCC
CCCCAANCCGGGTCCCGGTACTCGGAGACGCGCCCCAGGTGTAGCAGAGG
CCACCCCCATTTTTCCTCATTTTTTANTCTGATTTTCCCCCGTTTTTTCA
CCGCTTTTTCCCCGTTTTTTCCCCGTTTTTTCCCATTTTTTCCCCATTTT
TTCCCGTTTTTTTCCCAAATCCCCATTTTTCCCCCAGTCTCCCCACCCGC
TCGGATGTGCCACAGGCGAGGCCGGGGCCGCTCCCATTTCNCCCATTTTT
AATCCCANTTTCCCCCCATTTTTCCCCATTTTTTCCCCGTTTTTTCCCAT
TTTTTCACGTTTTTCCAATTTTTTTCCCGTTTTTTCCCAAAATCCCCATT
TTTCCCCCCAAACCCNCGTACTCGATGATGTGCTGCAGGCGCGGCGGAGG
CCAGCAGGAAAATTTCCCCATATTTCATCCATTTTTTGGCCTCTGAATTT
TCCCCGTTTTTTCACCGTTCTTCACCATTTTTTCACGTTTTTTTTCCCAA
TTTTTTCCCNATTTTCCCAAAATCCCCATTTTTCCCCCCAAACCCCCGTA
CTCGATCATGTGGTCCGGTGTGGCAGAGACCAGAATTCCCCCATATTCCA
TCATTTTTTGAATTTTCCTGCTGTTTTCCCCCATTTTTTCATCGTTTCTT
CCCCATTTTTTCTCCGNTTTCCCCCATTNTTTCACCGTTTTTTTCCCATT
TTTTCCCAANNTCCCCGTTTTTCCCCCCAATCCGTCCCAGGCCGCAGGGA
CGCTGGCCCAGGCGGCAGAGGCCAATTTCCATTTCACCTCATTTTTGGGC
TGAATTTCTGTTTTTGGCCATTTTTCGGGTTTTTTCCCCATTTTTTCACC
GATTTTCNCCATTTTTTCACCGTTTTTCACCGTTTTTCCCATTTTTTCCC
AATTTCCCCATTTTTCCCCCCAATCCGGGTCCCANGTACTCAGGGATGTG
CCCCANGTGATTTGGCANAGGNCACAAAACCNACAGAATTTCCCCATATT
TCACCNATTTTTTGGCAATTTTCCTGCTGNTTTTCCATCGTTCTTCCCCA
TTTTTTCNCCGTTTTCTCCCCATTATTCCNCCGNTTTTCCCCTATTTTTT
>oenMel6-7991#LTR/ERVL
TAGAGGATCCTACAGGATGTTCCCAGGAGCTTTCTCTACATCCAATGGAG
CCAATGCCACTGGCCACAGCTGAGCCCATCAGCAGCAGTGGCAGAGCCTC
TGGGACAGCATATTTGNGAAGGGGGAAAGNACTGCAGCNCAACAGCANCT
GGAANAGGGAGTGAGGANATGAGAGAGAGCCAGCTCTGCAGACTCCGAGT
TCAGCGANGCAAGAGGGGNAAAGGGGCATACTCCAGGCACNANAGCAGAN
ACTCCCCTGCAGCCCGCGGAGGAGACCACGGCGAAGCAGCTATGTTCCTG
CAGCCCTGGAGGGCCAGTGGAGCAGATATCCACGCTGCAGACTCTGGAGG
ACCCCACGTTAGAGCAGGTGGATGTNCCCTGAAGGANGCTGTGGCCCTGT
GGNAAGCCCGCACTGGAGCAGGTTTGCTGGCAGGACCTGTGGACACATGA
AGAGAGGAGCCCATGGTGTAGCAGCCTTGCTGGCAGGACTCATAACCCCA
CGGAAAGGACCCACGCTGGAGCAGTTGGGGAAAAACTCATGGGAAGGACT
CACATTGGGGTTGTTCATGGAGCACTGTCTCCTTTGAGAGATATCCCANG
CTGGAGCAGGGAGAAGTGAGTGAGGATGAAGGAGTGACCGAGANAAGGTG
TGANGAANTGGATGTGGCCCCNATTCCCCGTCCCCCCGCGCNGCTGGGGT
GGGGAAGGTAGGAGCGAAATCAGGAGTGAAGTTGAGCCTGGAAAAAGGGA
GGGGTGGGGGAAAGGTGTTTTNAGATTGATGTTTATTCTTCATTACCTTA
CTCTGNTTTTGATTGGGAAATTGAATAAATTTCACTAATTTGCCCAGTCA
AGCCTGTTTTGCANTGGTGGTATGTTGTCTCCTGATGAGACCCACGACTT
TCGTTATGTTTTTATCCCCTGCCCAGCTGAGGAGNAGTGACAGAGAGACT
TTGGCGAGNATCTGGCANCCAGTCAGGGTCAACCGACCACAATAA
>oenMel6-91#Unknown
TGTATCATTGGAGTTGTGGTGTTTTTATTTAGAGAGACTGTAAACGACAT
AACTTTCAGTTNNNCATGTCACAGGCTCAATGCTTAGAAGTTACAAGTTA
CAATTCAACATTAAAACAATGAACCATTTCAGTTCAAAACCATTAACATA
TTTAAAAACAAGAAACCGTTTAACTTAAAACCATTTCAANTAAGAACATA
CATATTTCCTTTATTCCTTACTCCTCTTTCTTTGTTTTATTTAAAAACAA
TAAACCATTTAACTTAAAACCGTTTCAATTAAGAACACACATATTTCTAT
CTCTCCTTTCTCTGTTTTTAGAAATTATAACAGGAACAAAATATGCACTT
TTGAATTANNTTAATNTGGTGAGAATTATAATTGCTGATATGTTACAATC
CAATTTTAGTGTTTAATACTGTTGAGGAGTTTTCCTTTACAATGATGACT
TAGGAGAATCTTCTCCGGATAAGATTCTTCATGTTTATCCCAAAGGAAAA
TGTTTTAGCTTTTGCAAGGCTAAATCAGCTANTCAAAATNACTTGTTTTC
ATTTTTAACTCGGAAATATCTGGATTTTATNATTTTCTCTCCTTGTCAGT
CAAATTTCAATCTGGCCACAATTGAAACAGACTGAGAAGGCTTTGATGGT
AAACATTTCCTTTTNCTTAGTTAAAATCTCAACCTGGCCAGGGTTGAGAC
TTTAGACTAGGCAAAATTTTCTATTATATTTTAAAACAAACCTTTACTAA
ATTTTAAACATTGTAAACAGAAGTGATAAGAGGTAGGTATTTTAGAAAAC
TNTGCAATCGTAATTTGTTAATGAAACATCTTTTACTAAATTAATCCGCA
TAGATTTGNTTTGTTGAACTTATAGTGTTAGAGTAAGCAAGATCTTCGAA
TTTTTCAGGATGGCTGATTGAGTATGATGCTAGCGCAATGTATATGAATA
AAGTTAACAAGCATTCTACCGTGAACTTCAACATACACTTAAAAAATTGT
AGACTATATTTGCAACATTGATAAAACAGCTTTTTAGCAACTGTAAAAGA
ACTGATTTGTGAAGTTTTAGTTTCAGTACCTGTAAACAACAGTAAACATT
GTACTACAAACTTTAGGACATATTTAGCAAACTGCAGCCCATATTTGCAG
TACTGGCATGGTGCCTTCACTGCAACTNCANAAAAAATAAANCAGGTNAN
CAAGGCAAATGTTAACTTAGTAAAGNTTGCAAAATATACANGNTTTGGCA
AAGTTANATTAGAGGTGGGTGAAGCAGNTGTTGAGCTCTGCTGAANGTGA
ACGTTGGTGTCTGCATCGCCTTGGTTGGTTGTTAAGTTCTTTGATTCATT
TTCACTGTCNTAAGACATGAGGCGAGTAACATGTTTTTACGTTCGTCGAG
AAGGTGGTTCGTCCTCTGTCGCTGTGTTCTAGCTTTTCTATGCGTCCGGC
GATACCTTTTCAGGTCGGCTTGTTTGCTAACTGNCTCTACGAAGCCTTAC
TTCGGTAATTCTTTTCTTGCTGTTTTTCGCTCGGTGGGCATTCTGCAGGG
GTTTTTCCCACGCTCTGATTTTTGGTTCTGATGCTAGTGTAGGTGTTCGA
GTCCCCCCCCTACCCGGGATGGCGGCTTTTCGCGTGATGGGGCTGTTTNA
GAATGCTACGTGGTTGCAGGCCATTCCCCTTTTATATCTATGTGTTTCTC
CCCCCCATAGCTTNGTGGAAGGTTAGTGTGTAGGTGTTCATTTCTTGGGG
AGAGATTTCCCTGTTCCCACGGACACTGTGTGTTATGGGGCTGTATTGTA
ATTAAACTNGNGACTTGAAAATCTCCTCCCGCTACCCTNATAAACTTCCA
GTTTTCCGTTGGAGGTGTAG
>oenMel1-0#LINE/CR1	 
GACAGGCTGGGAGAGCTGGGGGTGCTCACCTGGAGAAGAGAAGGCTCCGG
GGAGAGCTCAGAGCCCCTTCCTGGCAGGGGTTGGAACGGGATGANCTTTA
AGGTCCCTTCCAACCCAAACCATTCCGTGATTCTGTGA
>oenMel1-100#LTR/ERV1	 
AATTTGGTGACCCTGACACAATGAATTTCCATTTTTCAGGGGAGAAAAAA
GGATCCCGGGGAGGCGCCCCACCTTTGGTGGCCCCAAGTGACTGTTGACC
TCTGCTGGGTTAGAAAATTCATAAAACAGATAAGGCACAGGCAAGGAGTT
CGAGCTCCTGGAGGAAAACTGCAGTAAATTACCTGTAATTTCTTGTGCAG
AAAAATCCAGACGAGAAGTATCCAGACTGTAAGTACCGCTTGGGTGGTGT
CTGTTTGAGATGTAACATTGCTATGGGGCAAGTACTGAGTTCTTCTAGAA
TGGGTTCTGACTTCTTGCAAGAGAAGCAGCAGGCAAAGGAAGGATGCAAG
TGAAGAGGGGACTTTTAAATAAGATTGGGGGCTGGGAGCACTTGTCGAAG
GCACTTAAAATAAAGTCAGGTGCTGGAGGCGTTTGTCAAAGGGATTTTTT
TTAAAAGGTCAGGGGCCAGAGGCACCGAAGGCGCCTGTCGGGAATGGGTC
AGGTTTATAAAAAACCTCGAGACCTGGGTACCAAGGGTTCAGATAAGAAC
CAGGGTTCACGTAAGAACTGAGGTACCAAGGATAAAGGGAGCACATTACC
AGCATGGGAATGAGCCGTCTCTACTATATGCCTTAAGAACTAAAGGGGAG
ATGGAAAAGCATGAAAAGCCCTGGGACCCTTTAGATAATCTTTCCCCTCC
TTACCCTCCACAAGTACCACCTGAACGAGAGTCGGAACCAGAGAGCATTA
ATCCAAAACTCAGCTGTGGGTTTTCTAAATCTGGGTCTCCCTCCCACTCC
CCCTCTAAACACCACATTGGCTGCACCTTTTTTAAACGTGGTTCTCCCTC
CCCCTCTAAAATCACCCCAGACACAGCTTTTCCAAGCCAGGCTACCCCTT
CCCCTCCCCCAGTGAACACCTCCTGTAGTAACAACTTGCGTAAAAGCCAG
AATTATGGCATTGAAAGAAGAGGCGAATGATGAAGAAAGTAGGGATCAGT
TATATCCACTACGAGAGGTTCCACTAGGGGTAAATGTGGAGGGGATAAGG
TTGCATGAAAACAAATACAACCTCCGCCTGAACCTATACGAAAAATTGTT
TTCACTCCGGGGGACCTACGAGCAAAATTCTGGAAAAAACCTCGATAAAG
TTGACTCACATCATGGCAACCAGTTAAATATCTTTTAAGATATTCCAAGA
AACTAATTTGTCAAACTCCTAACTGTAATTGTAAACCTTGAGTATATTTT
CATTGTCTTAGGTGTGAGAATTTGTGGTATGGACATTGTACGTGGGAAAA
AAACACCAACGACTTAGGAACCCCCTCTGTCGTGGATATGCAAAAACAAA
AAGAGTAGGCACACTGGGCATTGGGCACCTAAATATTTTTATATATATTT
AGGCTAAAACTTTGAGACAAGGTTCAAACCCAGTAGGAAAAGTGTCAACA
GGGTAAAAGCGCATTATAAATTACAAGAAGTAAAGAATGTTCCAAAACAA
TTAAAAGGAATAGCAAAAAAAGATGATAATAAACCCCAGAAAATTAACAA
TTTCTATTCCAACGTATGGGAACACCTTTTATGGACAAAAAAGCCCAAAT
GTATTTTGGAGTGTGCAAAACAATACTAACTGTACCTTTAATAAAATAGA
AAAATTGTTTTGGTGTGGTAAGAGTGATGCCAACCCTTTTGAAGGAATAG
ACACATTAAAAAGGTTCTGGGAAAATCCCCAAGACACTGTAGGGGATTGG
AAAGTTCCAGATGGAAAATCTTGCCGCCTCAGAGAAAACTCACAAACTAA
TGATATTAACTAAAAATAATAAGAAATAGACCCCCGCACAAAAAACACTA
GATTGATTTGAAGAACAGACACAAATCAATGAGATAAAGAAGAGCGGAGA
TTGCGAGATGTTACATAGAGATTTGTGTCATTATGGAAATACACCATGGG
ATCAATATAAACAAGAATACTGAACTCAAAAAAAAGCATGAACATGAAAC
ACAGGAAAATATAATGATTTCATTATACTTGTTAAAATCACTTTCT
>oenMel1-102#LTR/ERVL	 
TGAAGTAAATGCTCCTCAACTGTGAGTTANGGACAAGGTTGTTAAAACGT
TGAATGTAGTTACTTACAAATAGTTACTGTTAGTGCTGGCAGAATGTGTA
NTGTGTATTCCCCAGTTCGTTTCCCGNCCAGNTGTGTAACGTGTATTCCC
CAGTTCATTTCCCATCCNGTTTGTTGTATTCCCTGCCCCAGTTCGCCATT
TCCGGTCCTGTCGCTTCTGTGTGCTTGTTCCCTCCCCCCCACTAACACCT
AAAAAGCAGTGCAGCAGAGTGACTCCCTGGACAACGTGAGCCAACATGAG
TTCCTGGGAACACCCGCGAGGACAGAACCCCCGACTCTGCAGCATCAGCG
GCAGAATCATCTTGGAGACTT
>oenMel1-104#LTR/ERV1	 
GGGTTGGGTTTTTGTGTAAAGTTTCATTATGCAGATGGTAATAGAATAAG
GGGTGGATAATGTGACCAGCACAGGAAACATCAACGTAAGAGGAAAGATG
TGTGCTAATGTCTTTACAAATCATTTGATGGGTGAAGGCATGGGTGTTAA
GGTCTGGGTGAAACGGGTTGTAAGATTTCTACTGACTGGGGGTAGATTTG
TTACTGGGCCCAGACAGCTTGGCTCCTGAAACAGACAAGGGTCTGCACAA
GCCTGAACTTCTGAACTTTGGGGGGAAATGCCAGATTCAAGAGGTGGGTG
TGTCCACAAGGGGGCAGCAATCCTCAAAGGGAGTAGGGGTGCTGGAGTAT
CATGCTGTGTCTACAAAGGGTCAGAACTACTCGGGAGGGGGACTGCAGTA
CTGGGTTTTGAAAGAGGGCAGCACTGCTCGCAAGGGGAGGGCTGCAGTAC
CATGCTGTGTTCACAAAGGGGCAGCATTGCTTAGAATTGGGGGACTGCAG
TACTGGGCTGTGTCCACATGGGGACAGCACTACTCGGGGGGGGTGGAGCT
GCAGTACCATGCTGTGTCCACAAGGGGGCAGAACTGCTCAGGGAGTGGGC
GGCTGCTGTACGGTCTTTTGTCCACAAGGTAGCAGCACTTCTCAGGGGGA
GCCTGCAGTTCCATGCTGTGTATACCAGATGGCAGGACTTCTCGAGGGAA
GTGACTGCAGTGCCATACTGTGTCCACAAGGGCCAGCACTGCACTGAGGG
GGTAGGGGGCTGCAGTAGTGTTTTGTCCACAAAGAGGGCAGCACTGCTTG
GAAGGCAAGGGCTGCAGTACCATGAGGTGTCCACAATGGTGCAGCACTGC
TCAGGGTGGAGGCTTGTCATATCATGCTGTTGTCACAAGGGTTCAGCACT
GCTTAGGGGAGGGGGGGGGTTGAAGTAGCATGCTGTTTCCACAACTGAAC
AGCGCTGTTTGGGGCGGGGGGTGGTAGACTGCAGAACTGAGTTGTGTCCA
CAAGGAGGTAGCACTGCTAAGGGAAGGGGGGGCCTGCATTTCTGGGTTGC
GTCCAGAAGACGGGAGCACTCTTTGAGGGGAGGTAGGGGGAGGGCCTGCA
GTATCATGCTGTGTCCACAAGTGGTCAGCACTGGTCCTGGTGGATGCGCT
GCTGTACTGTGCTGTGTCCACAAGGGGGCAGCACTGCTTGGGGGAAGGGG
GTGCTGCAGTACTGGGCGGTGTCCACAAGGCAGCTGCACTGCTCTGAGGG
TGTGGAGGCTGCATTACTGGCTGTGTCCAGAGGGGGGCAGCACTGCTCAG
AAGGGGCGGAGTGGGGGGGCTGCAGTACCCATCAGTATCCACAAGGAAGC
ATCACTCCTATGGAGGGGGGGGCTGCAGAAATGGGTTATGTCCAAATAGG
GGCAGCACATGTTGTGGGGGAGGGGGGGCTGCAGTACCAGTTTGTGTCCA
CAAGGGGGCAGCACTACTGGAGGGTGGGGGGGGGGGGGGGGAAGGCTGCA
GCACCATGCTGTTTTCACAAGGGGGCAGAACTGCTCAGAGTTTACGGGAC
TGGAGTACCAAGCTATGTCTACATGGAGGCAGCACTGCTTGGGGGGGGGT
GGAGCTGCAGTACCATGATGTGACCTCAAGGCGGCAGCACTTCTAGGAGA
AGGAGGGGGCTGCAGTACCATGCTGTGGCCACAAGGGGGCAGAACTGCTC
AGGGAGTGGATGGCTGCTGTACAGTCTTGTTGTCCACAAGGGGGCAGCAA
TGCTCAAGGGGAGGCTGCAGTTTCATGATGTGTCCACCAGATAGCAGCAC
TTCTCAAGGGAAGAAACTGCAGTACCATGCTGTGTCCACAAGGGGGCAGC
ATTGCTCTGGGGGGAAGGACTGCAACACCAGGCTGTGTCCACAAGAGAGT
AGCACTGCTCTAAGAGGGTCTAGCTGCAGTACCGGGTTGTGTCCACAGGA
GGGAAGCAGTGCCGAAGATGAGGGCTGCAGTACCATGCTCTGTCTGCAAG
GGGTCAGCACTCCTCGGAAGTGGTGGTGGATAGGGGGGAATTGTATTACC
AGGCTGCATCCACAAGGGGGCAGCACTGCTTGGGAAGGGAGGCTGCAGTA
CCAGGCTGTTCAGAATGCAGCAGCATTTCAAAGGGTCTGAAAGGGCTGCA
ATACTGCCTTGTGTCCACGGGGGGAAGCACTGCTGAGGGAAGGGGGTCCT
GCAGTTCCAGGTTGCGTCCAGAAGAGGGCAGCGCTCCTTGGGGGGTGGGG
AGGGGGGGGCTGCAGTATAATTCTCTGTTCACAAGAAGGCAGCACTACTT
GGGGGAGGGAGATGCTGCAGTACTGGGCTGTGTCCAGAGGGGGGCAGCAC
TGCTCAGAAGATGGGGTGGGGCGGGGGGGGCGCTGCAGTACCAATCAATA
TCCAGAAGGAAGTAGCAGCGCTCGTCGAGAGGGCTGCAGTACCGACCTAT
GTCCACAAGGGGGCAACCCTGCTCTGAAGGGGTGGGCTGCAGTACTAGAT
TGTGTCCACAATGGGGCAACACTGTTTTAAGGGTGGGATGCAGTTCTGGG
TTGTATTCACATGGGGGCAGCACTTTAGGGGTTGAAGGGGCTCTGGCTGC
AGTACCCGGTTGTGCCCACAAGGGGGCAGCATTGCTGAATAGGGGCTGCA
GTACTGAGCTGTGTTCACAAAGGGGCAGCTCTGCTCAAGGAGGGGCTCGG
TATAGTATAGTATCAGGTTGTGTCCACAACAGGGCAGCACTGCTCAGGAA
GTGATCTACAGGACCATGCTGTGTCCACAAGAGGGCAGCACGGCTCGAAA
GGGGGGGCTGCATTAGCGGGTTGTATCCAAAATGGGGCAACACTACTCAG
TAACGTGGGGCATGCAGTGCCATACTGTGTCCACAAGGAGGCAGCACTGC
TTGAGGACAAGAGGGGCTGCAGTTCCTGTTTGCATCCAAAAGGGGGCAGA
ACTGTTCGGGGGGGGGGGTGGGGTGTGCTGAAGTATCATGCTGTGTCTAC
AAGTGGTCAGAACTGCTCGGGGTGGGCCTGCACCACTGGGTTGTGTCCAC
AGGAGGGCAGCAGTGCCCGAGGTAGAAGCTGCAGTACTATGCTCTGTCCT
CAACAGGCAGCACTGCCCAGAAGAGGGGGAATTGTATTACCAGACTGTGT
CCAGAAGGGGGCAGCACTTCTCGGGGGTGGGAGGGGCAGGGTGGTGGTCC
AAAAGGACTGCAATACTGCCTTGTGTCCACAAGGGCGGCACTGTTCAGGG
AAGGGGGAAGCACACCGGGAGCAGTTGTGACCATGCTGGGTCACACTGAG
GGTTACTGGGGAGTCAATGGGAGCTACTCCTCTATACTGGGGGCAACTGG
GCATGACTGGGACCATACTGAGAGGGACTGGGATTATCTATGGAGAGACT
GGGACTGTGCTAGAGGCAGCTGTGTGCAACTGGGATCACACTGGATGATA
ATGGGAGCAGCTGTGTCCATGTCAGAGTCATACTGGGATCTACTGGAAGT
AGCTCGGATCATACTCAGAGTGACTGGAATAGTACTGGGAACATCCTAGA
ATGACTGAGAGCATACTGCAATCAGACTGGAAGTGATGGGAAAAGTGCCG
GCCATTGCTGGAACCATACTGCAAGTGACTCGGAGCAACTGGGCCCACAC
TGGGAGTGACAGGGAGTCACTCTGGGCATGACTGGAAGAATACTGGGAGG
ATCTGGGAGTGAGAGGGGTCATACTGGAGGTGACTGGAACGATACTGGGA
GAGACTACGGGTTCTACTGGGATCATCCTGGGAGCCACTGGGATGACTGT
GAGTGGGAATGGAACCAAACTGGGGGTTACTGAGAGCTACTGGACCCATG
TTGGGAGTTGGGAGGAAAATGTGGACACATTGGGAGCTACTGGGATCAAC
TGGAAGGTACTGGAACCATGCTGAGCGGACTGAGGCCAGAACATGGATCA
TACTGGGAGCAACTGAAAGTATGGGCAACTGACAGAAACTGGGATCAGGC
TGGAGACAACTGGGAGGAACTGGGAAAGACCGGCATCATTCAGAGGTAAC
CGGAACCTTACTAGGGCAGCTGGGACATAATGAGAGTGTCTGTAACCATA
CTGGGGGGACTGGAACTACACTGGGGGCAACTGGGAGATAGTGGGACAAT
GCTGAGAGAGACTGGGGCTATTCTAGGGATCATCCTGGTAGGAACTGGTA
ACAACTGGAACTATTCTGGCAGCAACTGGGATCATCCTGGGATCACAATG
AGAGCAGCTGGATCCATGCTGGGTGAGACTGGGATCACACTGAGGGTGAC
TGGAATCATACTGGGATGGACTGGGAGTGTCTGTGAACAACTGGAATTAT
GCTGAAAGCAACTGGGAAGAAGTGAGAGTGACTGGCAGCATGCTGGGGGG
ACTGGGAAATAGTGGGAGCTACAGGGATTCACAGGGATTATACTGGAGGC
TACTGGGGTCATGCTGGCATTGACAGGGAGAACTGGGGCCATTGCTGCAT
ACTGGGAGCGACTGGGACCATGCTATGGTTTAACTGGTAGAACTGAGAGC
ACACTGGATGGAACTGGGAAGAATTGGGACTGTTCTGGGGAAAGTTTCCC
CATAATAGGGAGTACCTGGGAGTGACTGGGCTCATCCTGGGAGTACCGAG
GAAACTGGAACCACACGGTGGGAGGAACGGGGCTCATCCTGGGAGCAGCC
ACTGCCGTCACCGGGAGCCCCGAAGCCCTTTCCCGGCCATGCCGCCCCTC
CGGCCCCAGCACCCCCCGCCAGGGTCCCAGCAATGCCAGGGGTTCCCCCT
TCTCGGGCTTTGCCCTTCTGGGGCTCTCCTCTCTCTGCACTCCCGCTCAG
GGAAGCTGCGCCTCTCCCGGGACTCCCCAAAAGCGCTGTCCCCCCGCCGA
TCCCGCCGCTCCCGCGCCCTCACCACAGCAGAGCTCGCATTCCCCTCATT
TCCTGGGCATTTATTAGCCCTGCCCATTTCTCTTCACAGCCCCTGTCAAT
CATTAACCCCTCCTCTTCCATTCGCATCAAGCCCTTGATTTCGCCCCGCC
CCATTCCCCTCTAGGCACCGCCCATCTTCTTGCTCATTCACCCCGCGCAT
GCTCAGAACACCCGGAAGTGTGTCCCGGGCGCCGTTTCCCCGCTTCGGCC
TCAGCGTGTTGGAGAGCTGCGGTGGGGCTGGAGGGGATCTATAGGGGTTC
CGTAGGGGATCTCTTGTGGGCTCGGTGGGCTTTACGGAACTGGGTGCTTC
CTGGGGGTCTGCAAAGAGGGTCTGGGGGCTCTGGGGGTCCCAAAAGTGCG
TCTGGCAGCTCTGTAGGGGACTGGGGGCGGGGCGGGGCTGAGTGTCTCTA
CAGAGGATTTGGGCTTGCCTATAGGGGACCTGTAGGGGATCTGTAGGGGC
CTGGGGGCGCTTTACCGCCTTGGGAGGTATTTGGGGGTGTGCAAAGGGGA
TTTGGAGGCTCTGCTGGGCCCATAAAGGGGGTTTGGGAGGTCTGTAGGGG
ATCTGTTAAGGGACTGGGTGGGGGGGGTCTGAGGGTCTCTATATGGGATT
TGGGGGGCTCTGGGAGGTCCCTGAAGGCGGCCTGGGAGGTCTGTAGGGGA
TCTGAGGAGATCTGTAGGGAACTGGTAGAGCCTATATAGGTTCCTGGAAG
GTCTGGGAGGGGTATCAGGGTTTCTAGAGGGGAATTTTGGGGTTCATAAA
GGGAATTTCTAGAAAATTTGTTCTCAATCTAGGGAATTCTTCAGGTCCCT
ATAGGGAATTTTGGGGTTCCTTTTGAGAATTTTTGGGAATTTTGGGGTCC
TTCAAGAGAATT
>oenMel1-104#LTR/ERVL	 
TTGAAGGAGCAAAGCCAGATGTTGAAGGAGCACAGCCAGATGTTGAAGGA
GCACTTTTCTTCAGCTGGTGAGAAACCCTCCCCCTGCCCTAAAGAGGGAG
AGTCAGATGGTGCTGCAGTGGAACCCGTAGATGTTGTATCTGTCCAGGCT
CCAGCCGGATCACAGGGGCAGCCACAGCCAGCGGCAGTTGCCCCTGTGGA
AACTAGAAAATCTAAGATCAAAACGAGGCACCTAGATAATGGGGATCAGC
CAGGAGGGTCCTCACAGCCAGCAAGGGAGCCAGAGACTGAGATTGTCACG
AGTCCCTCTCATACGACAGTCTCCGTGACCTGCGTAAAGACATTGCACGG
CGAGGCCGTGAGCCTNTTACAACTTGGCTANTCCGGNTCTGGGACCTTGC
GGGAACAGGTGTGCAACTGGATGGNACTGAGGCCAGGCATTTGGGATCCC
TGNCCCAGGATCCAGNCGTNGACCAAGGTATGATGAGGGAGCAAGGCCTC
CTTTCAAGCCTCTGGGCACGGCTTTTAATGAGTGTGAGAGAGANGTCTGT
NCGCNGATGACCTGNGNATGCAGGAGTACCAACGTAGAATGCGCTGGAAA
ACCNTCGAGNAAGGGATCCAGCGNCTGAGAGAAGTGGCGGTGNTAGAGGT
TACTCTTTCGGANGGATGGACAGCATGACAATGACCCTGACAAGGTCAGG
TGCACAGGGCAGATGCTGTGGAATCTGGCGANCCTGGGGCCATCTNAATA
TGCCACCTTCATTGCAATGATNAACGCTGATGACCACCAAGAGACAGTGG
GTTCTGTTGCCAACAGACTCAGAAATTTCGAGAGTACGATGAATGGCCCA
ACGCANGCCAGNGTCGCNGCCGTGGCCAGGGACCTCCAAGAGGTCCAAGA
CAGGATGGAGGAGATGAGGGAGGAGATGAGGGAGGAGATGAGGGAGGAGA
TAAGGAAGATCAGTNCAGCACCAGTGCGAGTCGNAGGCCCCGAATCTAGA
ACCCAACGCCCCCCAGCTGGGGAGAGAGGGTACACCCCACGAGCTGANCT
GTGGTTTTTCCTGCGNGACCGCGGAGAAGACATGAGGAAGTGGGATGGAA
AGCCCACNGCTGTCCTGGCAGNACGGGTGCGTGANTTGAGGGAAGGAAAG
GCTAACAGAGGGAACCGTNCCAAGANGAAGGCAGCTCCAGTCTCCCGTGG
TCAAGGTGCCGGGTATCACAGAAGGGAGGATGATCTGTCCGATCCCCTCG
AAGGAACCTCTACTATGTATGCCCAGGAAAGAAANAATAACCAGGNCTAG
AGGGGCCCTGCCTCTAGCCAGGGNGAGGCAAGGGANAATACCGATTGCCA
CCNCGACAGTGCACCGCCGGCAATACCGGACAACTCGAGATGCTGTGATC
CCCATCCACAAGATGATCCGTGAGCTGGAGAGCCAAGGGGTGGTCAGCAA
AACCC
>oenMel1-105#LTR/ERV1	 
TGTTATAAATGAGAAACAAAGTCTCGATATTCAGCAAAATTTAGATTGCT
TTATTTTATATAGACAGAGCAAGCAGCGCTGGGGAAAACGTGAGGGGTCA
ANGTAACCATCTGGTCTTGGTAGATAAAAAGCAGAAGTGGGAAGTCTGGT
CTTTAGCGGATAGNCTGCGATTGATCACACAAAGGCAGGAAATCTGATTC
T
>oenMel1-105#LTR/ERVK	 
TGTGTAGGAAATCTGAACTCCCCTAAAACTGGCCCCTGGAATCTTATCCC
TTAGAACAAAGAAATTCCTAAGGACAGGGGCCCTCTTTCCTATCTCAGCT
TCCGTTATCTTTTAAGATTTCTATTGTTTCTTAAAGTGTTGTAATAATTG
GTTCTTTTCTTACTTTGCTAAAGTTCTGAGCTGTCCGTACTCTAAGTAGC
TGCTTGAAGGGGGGCTGGAAGGCTCCAGCACCCTCAAAATACAGCTACA
>oenMel1-106#LTR/ERVK	 
TTTTGGCATCCTGAACAGTTTTGAGACCACCTCAACAACTGACGAGCGGC
ATTCTTTGTTCCACCTTCTGAGCGCTGAAACCCGCCCAGCGTTGCTGCTC
TTTGTTTTAAAAAGAGTAGCCACAACCGGACCATCCAGCAACCCCAACGA
CAGAATCGGGATTGGACATCTCTAGCAGCTGCCAGCAGCCGACCCACATC
CTTCGGCTGAGATTTGGTGAGCACTCAGCCTCCTTTAAAGCGCGCTTTCT
CTTATGTGGTCAAATTGGGATTTTTGGGGTTTCTTTTGTTTTTTTTCTCT
TTTTCTGCTGGACAGTTTCGGTTCCATGGGGAAACGGCTCACGAAACCCC
CCCTATCCCCCATGGAAGAAAGCTTTTATTCCCAGATATTAACCCTTTTA
TCTAATAATAATTTTAAACTTTAAAAAAACCCTCTTTCTAAGCGTGCTTT
AAAATCTTTCGTTAAATTCATATTTTCTCATTTCCCCAATACTAACTCTG
ACTCTATAGCATCGGGGGACTTTTGGAACAATATCGGCATTTTAATCTAT
TTCTTACAAACACAGCAAGACTTTACGGTTACGCGTTTTTTACCTTTAAT
TCAAGAAATCATAAGAGCTACCCGCAATACCTTTTCCCCGCTTTTTCCTC
CCCAAAATCTCCGCAACGCTCCGCAAAACCCATGTTCCAATCCTGGCGGG
ACGCCGCCGACATCCACGGCCGGCCTCTTCTCTGTCCTGTGCACCGCGCT
CCAAGCAGACGCCCCACTCTCCTTCCCGGCGGCATGCCGCAGCCGCCGCA
GGCACCGAGCCTGTCCCCCCCTCCCCTTTTTCGCAGCGCACGCGTGGCTC
TAAGTCACAGGCAGCAGCCACCCCAACTCCCCCACCCTCCCCCGTGCCCC
GCGGTTTTGGGGAGTCCCTTCCCGCGCACACAGCCAGCCTTTCCTCCACG
CAAAATCACTCCAATCCGTTTCCCCCTGCCTCGTTCGCCTCCCTGCACCC
CTGTTCTGAGCCCTCCCACGCGTCCGGGGAAGCCTCAATCCCTGCCTCAC
CCCTTTTGCCCATGCAGCCAATTCCCTTGCAAGCCCCGCCGCCGCCGCCG
CTGCCGTCAGTGCCTCTCGTCCCAGCGTTGGCTCCCGAGCACCCCTCCTC
CCTTGCGAACCCCGTTTCTCTCACGCATGCTTTTCCTCCACCCACTTTGC
AGACCCCCGGTCAAAGCTTTCCCGCTTTGCTTTCCCCGTGTAGTCCTGCG
ACTCACCCTTCTCCCCATCCCCTCCCTTCGGCTGTCCCTTTGTCTGTTTC
CAATGCACCTTTCCCCGCAGCACACACCTCGCCCCATCCCCCACTCCCCA
CCCCTGTAGTGGCCCCCTGCAATCCCTCACTCCCTACGGTTGCTACGGAC
ACCGCATTCCTCCAGCATTGCGACACACCCCACCCCCTGCCGCCCACCCC
CTCCCATGCCATCCGCTCCACTAACCCCCAACTGTTTCCATTTCTAGTGC
GCCACTGCCACTGTGTGGCGAAACTGTGTCATGCACGCAGCCAAGTTATC
CCCAACCCCTGGCAACTGCTCCACCCCTCCCCCATGCCTCCCAGCCCGGT
GTTTCCCTGCCCACATCCCAATCCTTTGCCAATACCCTCCCTTCTCATTC
TAAAAAAATGCCACAGAAGACGTAGATACTCTACCTCTTCTGATGACACA
GACTCTTATAATTCTGAAAATGAACAAGATCCATGGAATAATGTTAAGCT
ATTGGCCACTCAAAATGGTGATTGGCAAATGGCTCAAAAGATTTCTGCCT
TTCCGGTAACATATAAGCCAGGCCACAGGGGAGGTGCCACAAACACTGCT
CAGTAGGAAGCATTTTATGCAAAACAATTAACTGAATTGTCCAAGATCGC
AAAGGAACATATTAGAAATACCCAAATTTTTAGACGGAGTCACAGGAGCC
TTTGCAGCAGTGGCCTCCAAGGAAAATGCCAGATGCTTCTACTGTGGGGA
ACCTGGACATTTCATTAAAAATTGCCCAGAAAAGCCACAAATTCAACAAC
ATCCCAACAATCATCCCAGGCCCCAAAAACAGCAAAAGCACCCACAGAAT
CAAAAAAACTGCCAGTGCAGCGTGGGAATGGCACCGCGCCAGGATAACAA
ATCAAAGGACATCACTACCCCAGTGCCTCCTATGAAAATCAATCAAATTC
CAGAACGTATCAAGATGGTCCAACACACCCCCAGATATCGTTGGGAACCA
AACGCGGACTGGTAAATTCCTTGCCTTTCAACTTTACAGATAGCAAATTT
TACCGTGTTCCTACAGGCAAATGTGGGCCACCAGGTGGCCCTTGGGACAT
TTTCTTTTTTGGTGATACTGTACACAGTCCAAAGCAAATTTCTGTTTTAC
CAGAAATTCAAACTGTTCAATCTGGGCAAGAAATTCTTGTTCAGCTTCGC
TGCACAGACACGTCTTTTTTCCTTCCGCAGGGCACACCAATTGCACAAGC
CCTCCTGCTTCCACAAAACTACAATGAACAGCTTCCCCTCAACCCTACTG
TATTGTGGGTGCAAATCATGGGATCCCAGAAACCCGTCATTGAATGCAAC
ATCCTCTGCAAAGCTGAGAGGATCCTCCGACCGTCTGCCATCTGGTCCAA
AATGGTACCCAGCAAAAAACATAAAACCATATTTGGGCACTGCAAAACCA
ATCACCAGCAAAACTTCTCCTAAGTCCAACACAAAACCTCCTCAAAACCA
AACCAGCTCTGCATGGAGACACAGGTGTCGCAGAGCACCCACATTTCAAA
TGAAAAATTCTCCTGTCACTCGACAGCGAACGAAACAGAAAACCAGCTGC
CTCAGATAAGCATTAAGCTAAATTTAAATTGTTTTCTTTCTTAGTAGTTT
TAGTTTAAAAATTATTAACCTTTGTTAAGAAAAATAAGTTTTTGTTTATT
ACTTTAGTTAAAACTTGCTACCATATACTTAATTTTTTTTTAGTTTAGTG
TTAAAAGAAGGGGGGGAGGAAAAGAAAGGACAGAAACTCTATCCCTCTTT
TTTTCAAAAAAAACAAATTTTGCTTGTATTTCCTATCAGAAGCCTCATCA
TTGCTCAAAGATGAAAATTTTCTTCGCTGGTGTTGTTTTCACTGCTGCCT
GGATGTTCTTCAACATGCCACATGCCTCTTTGCAGCAGATGAATGGCCCG
TTCAAAATTCAGAACTCTTTCGCACCACAGGTAAGAAGCCCAACCCCGTG
GACGCTTGGGATGATTGGACACCCTAGGCAAAACATACATGAATTGGATT
TCTACAAAAACACATAGAGAAAAGACATATCACCCATCAGCAAAGCATAC
AACTATCCAGATTGGTGTAATTACACCGCTCCCACAATTTCTGAGTCTTC
TCTCGAAGAAAACATCCAGAAGCTGAAAAACCTCGTGAAAGACCTGAAAA
CAGAAACCACTCCAGATTGGGTCAACAACCTTTTTAGCCAATGGGGACTG
ACAGGATGGGTTTCTTCCTTGGTTAAGGGAATTTTGTGGATTTTCATTGT
TATCCTTGTTGTGTTAGCTATGTTTTCATGTTTAGTTCAATGTTTTAAGA
AAACTGTTAAAAACACTTTCTTTGTAAATACAGAGAGAGGAAT
>oenMel1-107#LTR/ERVK	 
ACAGTTCCCTGTTTCTTTCTTATTAATTTGAAGAAAATTTTCAAAATGCA
AGTATGCAGCTTGTTCTCCGTTATCTTACCTGAAAGGGGCCTTTTGCATG
CAAAATGACATTGACAGCATAAGTTCAACTTGAATTAGTTTTTTACATAG
CTCAATAAATTTGGCTTTCTTAGATGATGATGGGTTCCATGTTACTAAAG
CTGCTGTGTTTATGTTCAGGAGTGGTTGGGTATTTAGTTACCTTCGCTTT
TCATATATCACAGTTTAACTGCTCAACAATAAAATTGTAAATTAACTCTA
TAACCATAAAACTTTAAACCTCTTTGTTAAACTGTACCTTAATAAAACAT
TTAGCTTCAGAATTGTGCAAAATTCCAATTTAGCAAAACAATTTTTAAAC
AAGAAAATATTTTGTAAGCAAACAACTCTGTTATTTCAATGTCCTATGAC
TCTGCAAGTTAGGTGAGTAAATTGTTCCAGTTATTGTTCTAAATTCTGCT
CCCCAACGTCTTTCGAGGATCTTTCAGAGGGTTGCTCTCCTCTGCGTCTT
GCTCCCGCACATCCATCGAGGAGGCCTCAGCAGGATGCTGTCTGTGGTTC
CGTGCCGGACGAACACATCTGGCAGGTACCCAATGCGTACCTGTATCTGT
GGTTAGACACATGTACCCCCATCCTCAGGTGATGAGATCCCACGGACCCC
CCCATTTATTGATGTCGAGATCTCACAACATCACCTTGGGTTTTGGTAAC
TGTTCATAGCCAGGTGATTGTAGTGATGGGAAGTGATTTAAGATAACTGG
ATTCTGTGAATTTTCTATTACTCTCAAGTGTTTTAGTGTGTAAACAGTCT
TTTCTACTCTGCTCTGTGGGGTTTCTCCACACATTCCTCTCTTTTGTTTT
CAAGCGTAATTTTTCAAGTGCCATGTGCTCTTTCCACCATGGCTTGTCCT
GTTGCTATTTTTCAAATGCAAGTGCGGTGTAGCACTCTTCAGAGCTGTAA
GAAATTTCTTGTTTTCTGTGAAATGTATGCAGGATCATTATTGGTTTTAT
GATATGGGAATGTGTTGGAGGCCTTGCAGCTGCTGGAGGCCTTGCAGCTG
CTCTGAATCTTGCTCCGATTTACCGTAAAGTGCCTTGATTTAAACCAGCA
AGGTCAGAGTATCCTTGGACTGATAAAGCAGGAAAGAATAAGACCATAAA
TTTTGCTCAGGGTTAAAGAAGAAGACATCTGGAGGAAACAGGACCTTGGT
GGATTGCCATAGCATGAAACTTCAAAGAATATCTTGCTTAATTGTTAAAG
TAAAAATAGCTTATCNTAGGTTAACCAATTGTATGTTAGAATGCATATAA
ACTTTTTTCATNTAACCAATAGAATCCATTGTAACAAGAATGCTACTGAT
CGAATAAGAGTATAAAAAGACAAGCTTTGTGATTGAATAAAGCGCGCTCT
TTTGACTGACTTCGGAGTTCTGTTTTGGGGTTCGTGACATCTTGGTGACT
CCGACGTGATCCAGGGAGACGCGATCCGGGGTGAAAAGAGTCAGGAAGGA
CCTAATCATCTTGTTGCGGTTGCGACCGGGCGTTCGAGACGCGTGTGGCC
ACTGATCGACCGGTGAGTTGGAGCCCTGTGAGGCTGCAGCCAAGAGCTGG
TATTAGCAAGATGGGTAATAATATATCCGCTTTGGAAAAGGTTACTGTGG
ACTCAATTCTCGCTATAGTGAGGAAAAAAGGGGAGAATTTTAATCGGTCT
CAACTCGTAGATCTGCTCTACTGGGCAAAGCGGAGAGGGTTCATAAAGGA
CACTATAGACATTTTTTAATGAGAAACTTGGCAGGCAGTAGGAGCAGACT
TGTGGGAAGCTATTCAAGTGGAGAGTAAGGAAGCAAAAACGCTAGCTTCT
GTGTACAAACAGATGCGCACCCTGATTGAACAAATGGGGGCAGAGGCAGA
GGTTAATCTAGCGGCACAAACTTTGGTTACAGCAGCTGCGGAGAAGCTTT
CTCTCATGACAGAGTCTCATCCCTCCGCCTCTGAACCACAGCTGCTGTCC
TCTGACCCTGGTGCATCTGGGTTATCCTCTTTTGAGGTGATTGCTAGCTC
TCCCCCTGACTATATCGCTGCTCCTGGCCAAAAAGGACCATATGATTATT
TAATTCCTCCATGGAACCCCTCCGAGTCCAAGAGTGTTCCATCAGCTCCA
TCAGCTGTACACAACGATAACAGCAGTACAAACCCGCTTCTACCAAAAAG
GGCAATTGATCCTGCCGCAGTACCTCTTCCCTGTGATATGGAAATAGACT
CAGAAGATAAGGGAGATTTAAGTCATCAATTAGAAGAACAAAAAACTGTA
ATGCTTAATCTATTAGGGGAAATGAAGCGACTAGACAAAGGATCATCTTC
TAAGAATGTAAAAAGGGCATATAAAAAAGCACACGATGCTATAATAGAAG
GACTAAAAACTCTGGAAGAAAACTCTCGTCCTCTATCTTCTCTAGAAAAA
ATGGACAGGAGGCAAAAGACTTTACAGCTTATCTATGACAATGGGTTTGA
TTTAGAGACGGCTCAAAGTAATTTAAGAGCAAAGGGATTGCCTGTCTTAT
CTCCGGAGGAGGCAGGATGCTGGATTCATGGATCTGATCCTACCCTGTCG
ACTTCTGAAGGGTTAATAGACAGTTTTACTAAATGGTGGAGGGATAAAGA
CAATTCAGCAGGGAGGGGACCGGATCGGAATGATCCACCGCGAAATGCTA
ATTTTGATATGGCTAAAAGGTGGAAAGGTCTTGTAACAAATGCAGAATTA
ACCGGGGATTTTCAATTTGTAGCAGCACCAGCGTTAGCTGCGCCTGTAGT
TCGTAATGCTAATGGAAATCTGTATCAGCGGGAGTGGAATTGGCCCCTGA
TATTCCTCTTGCATTAAAACATACCATGGTAAGAGAAGTGGCTTCGCAAA
ATGCGAACAGTATCTGTAAAAAACTTTTGGCAACATTACCTTCAAATGTG
ACTCTTTTACAAATGATTGAATTATGCTCCAGAGCTCCCCTGGAAATAGA
AAAGGAAAAGGCTCGCAAACATGCATCAGCCTTAGCAGCAGCCTTAACAA
AAAATAGAGGTAATAAAAGTAGTAGCAATAAGGTCCCAATGGATTCTTGT
TACAATTGTGGTCACCGTGGTCATACATGAAAATATTGTTCATTGAGGTT
GCAGAAACAGAATATTTCTGTTCCTGCAGCGTCTTCAGCCTTTGCAGAGA
GAGCTATAACTCATCCCATGAACCTCCCGCCTCAGGAGCCGACAGCTCTA
TCTGCTCCTGCAGAAGCCTGTCAAGGATGCAAGTAGCGACGAGTGGAAGT
GCTGGGGTCGACTGGTAACTGCGGAATCCACTGACATAACTCAGACCATT
ACTTGGTCAGACGAAGCAGAAAAGGCAATGGAAAAAATCCTGCAACAAAT
ACAAAATTCATTTGCTTACAGGTATGATGCACAATTAGAACTCAATGTAT
ATGTTCTGAGCTTGAGCAATGAATTCGTTGCAGTAATTGGCCAGTACAAT
GTACTGAGCAAAAATTTTTATGTTTTGGAATGGATTTTTACTGCTTGTGT
GCCCAATTCAACACTTACAAATAGAATTGATTTGCTTGGCACACTCTTGC
TCAAATCTCGAAGACGAGTACGCCTGGTCTATGGGAAAGAGCCTGACTGT
ATATATCTTAATGTTTCAGTCTTATCTCTTTGTGATGAATGGTTGCAGTG
CTCTTATGTTTTTGCTACAGCTACACTTGGTATCCGGATTGATAATCATT
ACCCTCCATTTTCATTGTTTTCTGTTTCCCTTCCTTTTTATTTTAGAGAT
ATACGTGTATCCAAACCAATTGCAAATGCTTTAACTGTTTTTTCTGATGC
TAGTGGGCATACAGGTAAATATGGGTATACATATTGCAATGAAGGGCAGT
GGGTTACTCAGGTGCAGGTTCAACAAAATTGTTCAGTTCAGTTGTTAGAA
CTTAAAGTTGTTGTATTAATCTTTCAAGATTTCTCTGACATACCACTTAA
CATTGTTTGTGATTCTCTGTACGTGGCATCTATCCTTGAGCGTATTCAAG
ACTCCCTGTTTGGAAAAATATCTAATGAAAAAATTGCAGACGAGCTAAAA
AAATTGGCTAATCTTCTTTCATGCAGAACTGAGTTATTTTATTCAACCTC
ATAATTGGAAAATGTGGATGTCTCGACCGGATGGCGAACAGTCTTTAATA
CCAATTATTAGTCATTTTGCCAGTTTCTTTTCTCAAAATACAAAGGTGCC
TGTATCTATTTGGGAACCCTCAGAGAAGGTGTGGAAAGGGCCACATACAT
TACTCACATGGGGGCGGGGTTACGCTTGTGTTTTGACAGGTGGCAAACCT
CATTGGCTCCCAGCCAAGTGGGTAAAACCGTGGTTAACCCAAACTAGGAG
GTGTATCTGCAGGACAACGATCTTATCCAGTGGAGCCTGGGACCTTGGGA
GACTCTTTTGACTGACTTTGGAGTTCTGTTTTAGGGTTCGTGACACAACT
GCATGGG
>oenMel1-108#LTR/ERVK	 
AAACCTTGGTGACCTCGACGTGATCCGGAAAGACCTCGGGGAGACGCGAT
CCGGGGTGAAAAGAGCCGGGAAGGACTTAATCATCTTGCTGCGGTTGCAA
CCGGGCATTCGAGAGAGACGCGTGTGGCCACTGATCGACCGGTGAGTCAG
AGCCCTGTGAGGCTGCAGCCAAGAGCTGGTATTAGCAAGATGGGTAATAA
TATATCCGCTTTGGAAAAGGTTACTGTGGACTGAATTCTCGCTGTAGCAA
AGAAAAAAGGGGAGAATTTTAATCGGTCCCAACTCGTAGATCTGCTCTAC
TGGGCAAAGCGGAGAGGGTTCATAAAGGACACTATAGACATTTTTAATGA
GACAACTTGACAGGCAGTAGGAGCAGACTTGTGGGAAGCTATTCAAGCGG
GGAATAAGGAAGCTAAAACGCTAGCTTCTGTGTACAAACAGATGCGCACC
CTGATTGAACAAATGGGGGCAGAGGCAGAGGTTAATCTAGCGGCACAAAC
TTTGGTTACAGCAGCTGCGGAGAAGCTTTCGCTCACGACAGAGTCTCATC
CCTCCGCCTCTGAACCACAGCCGCTGTCCTCTGACCCTGGTGCATCTGGG
TTATCCTCTTTTGAGGTGATTGCTAGCTCTCCTCCTGACTATATCGCTGC
TCCTGCCCAAAAAGGACCATATGATTATTTAATTCCTCCATGGAACCCCT
CCGAGTCCAAGAGTGTTCCATCAGCTCCATCAGCTGTACACAACAATAAC
AGCAGTACAAACCCGTTTCTACCAAAAAGGGCAATTGATCCTGCCGCAGT
ACCTCTTCCCTGTGATATGGAAATAGACTCAGAAGATAAGGGAGATTTAA
GTCATCAATTAGAAGAACAAAAAACTGTAATGCTTAATCTATTAGGGGAA
ATGAAGCGACTAGACAAAGGATCATCTTCTAAGAATGTAAAAAGGGCATA
TAAAAAAGCACACGATGCTATAATAGAAGGACTAAAAACTTTGGAAGAAA
ATTCTCGTCCTCTATCTTCCCTATCTACCCTAGAAAAAATGGACAGGAGG
CAAAAGACTTTACAGCTTATCTATGACAATGGGTTTGATTTAGAGACGGC
TCAAAGTTATTTAAGAGCCAAGGGATTGCCTGTCTTATCTCCGGGGAGGC
AGGACGCTGGATTCGTGGATCCGATCCTACCCCGTCGACTTCTGAAGGGT
TAACAGACAGTTTTACTAAATGGTGGAGGGATAAAGACAATTCAGGGGGG
AGGGGACCGGATCGGAATGATCCACCGCGAAATGCTAATTTTGATATGGC
TAAAAGGTGGAAAGGTCTTGTAACAAATGCAGAATTAACCGGGGATTTTC
AATTTGTAGCAGCACCAGCTTTAGCTGCACCTGTAGTTCATAATGCTAAT
GGAAATCTGTATCAGCGGGAGTGGAATTGGCCACTGATATTCCTCTTGCA
TTAAAAGATACCATGGTAAAAGAAGTGGCTTTGCAAAATGCGAACAGTAT
CTGTAAAAAACTTTTGGCAACATTACCTTCAAATGTGACTCTTTTACAAA
TGATTGAATTAGGCTCCAGAGCTCCCCTGGAAATAGAAAAGGAAAAGGCT
CGCATACATGCATCAGCCTTAGCAGCAGCCTTAACAAAAAACGGAGGTAA
TAAAAGTAGTAGCAATAAGGTCCCAATGGATTCTTGTTACAATTGTGGTC
ACCGTGGTCATATACGAAAATATTGTCCATTGAGGTTGCAGAAACAGAAT
ATTTCTGTTCCTGCAGCATCTTCAGCCTTTGCAGGGGTATGTCGCCGGTG
TGATAAATTTGGTCATAAAGCACACGAATGTCGCTCTAAATTCAAGAAGG
ATGGAACACCTCTGCCGGGAAACGAGAGGAGCCGTGTGGGGGGCGCAGCT
ATAACTCATCCCATGAACCTCCTGCCTCAGGAGCCGACAGCTCTATCTGC
TCCTGCGGAAGCCTGTCAAGGATGCAAGCAGTGACGAGTGGAAGTGCTGG
GGTCGACCTGGTAACTGCGGAATCGGTAACTGTTAAGGATGAAAATGTTG
TTTTAATTGATACTACAACAAAACATGGCATTTTCTGAAATGTTGTCAGC
TAAAAGACCTACACGACAGGTGATATTATGTATGAAAGAAAATGGTGAGA
GTGCGAGCGAAATTCAATTGCAAGCAGAAATGATGATGGACACAGGTGCA
GATGTTACTATTGTGCCTCTTTCAGCTTGGCCAGAGTCCTGGCCTCTAGT
CAAATTAACAGAAACACTATTGGGTGTTGCGGGAGTTACATCTACTTGGC
AGAGTAAAAATTCTATTGTCATTCTAGACCAGGAAGGTAACAAAGCAGTT
ACTCATCCATACGAGTGTAAGATCATGGACAGGGATAACAAATTCAGATA
TTGCACCCATTCGTATTTTGCTGGAAGGAACCACTGACATAACTCAGACC
ATTACTTGGTCAGACAAAGCAGAAAAGGCAATGGAAAAAATCCTGCAAAA
AATACAAAATTAATTTGCTTACAGGTATGATGCACAATTAGAACTTAATG
TATATGTTCTGAACTTGAGCAATGAATTCGTTGCAGTAATTGGCCAGTAC
AATGTACTGAGCAAAAATTTTTATGTTTTGGAATGGATTTTTACTGCTTG
TGTGCCCAATTCGACACTTATAAATAGAATTGATTTGCTTGGCACACTCT
TGCTCAAATCTCGAAGACGAGTACGCCTCGTCTATGGGAAAGAGCCTGAC
TGTATATATCTTAATGTTTCAGTTTTATCTCTTTGTGATGAATGGTTGCA
GTGCTCTTATGTTTTTGCTACAGCTATACTTGGTATTCGGATTGATAATC
ATTACCCTCCATTTTCATTGTTTTCTGTTTCCCTTCCTTTTTATTTTAGA
GATATACGTGTATCCAAACCAATCGCAAATGCTTTAACTGTTTTTTCTGA
TGCTAGTGGGCGTACAGGTAAATATGGGTATACATATTGCAATGAAGGGC
AGTGGGTTACTCAGGTACAGATTCAACAAAATTGCTCAGTTCAATTGTTA
GAACTTAAAGCTGTTGTATTAATCTTTCAAGATTTCTCTGACATACCATT
TAACATTGTTTGTGATTCTCTGTACGTGGCATCTATCATTGAGTGTACTC
AAGACTCCCTGTTTGGAAAAATATCTAATGAAAAAAGTTGCAGACGAGCT
AAGAAAATTGGCTAATCTTCTTTCATGCAGAACAGAGTTACACCTCAGGA
AATTGTTGTGAAAACGTTGTATGTTCATAATTGGAAAATGTGGATGTCTC
GACTGGACGGCGAACAGTCTTTAACACCAATTGTTAGTCATTTTGCCAGT
TCCTTTTCTCAAAATACAAAGGTGCCTGTATCTATTTGGGAACCCTCAGA
AAAGGTGTGGAAAGGGCCACATACATTACTCACATGGGGGCAGGGTTACG
CTTGTGTTTTGACAGGAGACACACCTCATTGGCTCCCAGCGAAGTGGGTA
AAACCGTGGTTAATCCAAACTGGAGGCGTATCTGCAGGACAACGATCTTA
TCCAGTGGAGCCTGGGACCTTGGGAGACTCCGGAAGAATTTCTCCGGAGA
TCACCGAGGCGATTGATCAGATGGGAAAAGAGGGTTCGGTGGATTAGAGA
ACTCTTGATAAAATACCATCATTTAGATCTGTTGTTACCATTGTAGAAAG
GTATTTGTTACAGAGAATAGCTGAATACAGGAAAAGGGATTGTGGATGTT
GCACATGGTTAGAGGGTAGTTTTGAATGTGGGAATTGTGGTAGGATTTAT
AATTCTCCTGTTTTACAAGTTGCTCTTTCAGGTTGTAGGAGATGTCTTAA
TGAAACTCAGCGTGTATTTTTTGATCCGCCTGATCCTATAGCTGCTTTAA
ACGCTTGGTTGCATACAAATATTAACAGCCAGGAAGCAAGCCAGTTGTTT
GAAAGTGTAGAAGAATGAGAATTAGCTTTGTATATTTGGTATCTATCTAC
ACCTCTCAAATACTTTTTGTGCATAATTAAGACAAAGGTTAAAACAGCCC
GATATGCTGTTACCTGCTCAAATCATAGGCAATCAGTGCAAAATTTTGAC
GGTGTCCTTCACCCATTCAATGAATTGTCAATTAGTAATAACACTCGGGC
TAATGAGCCTCAAAATCGTTCTCGGCGGTCCCATCAGATAATAGTCCGCT
TGATGAATGGCTCATGTCATTTGGCATCTCTGCTTGGGTGAAGGATATTC
TAAAAGGAGCTTTTATTATTGTATTAATCATTATTGTTGTTGTTATTATG
GGACCTTGTATTATTCAATGCTTTTCTTTCCAGATTAGCAAGATAGCCGA
CGCAGTGTTTGAAAAGAGAGGGGGAGATGTTGGAGG
>oenMel1-109#LTR/ERV1	 
GTTGTGTTACTGCCTGTGCCACTGCAGTAGTGCTGCTGAGGGAATTCAAG
CCCATTTCTTTATTAAGCCTGTATTCCTTATGCCAAATATATCTCATGTG
CATTTTATACTCCTGCAGCAGTGACAAAAATAAAGTTTTTCTAGACCAAA
ATGCTGTGGGTTTTCTGTGCTTTTTCTTCTGAACCTGGGACAGAGATTGC
TGAAATCCAGCTTGTTCTAGCAAGGGGCCACCAGGAAGTAATTTCGGGTG
GTTTGATGGAGTGATAGTTTCCATGGCAATTTGGTTCTTACCTAACACAG
CCCAGCTCACACCTTCCCCAGCTCATCCCCCTCTCACAAGCTACAGGCAG
GATGCTGTGGTCACCATTTGTGACTCACTTACAGCAGGCAGCATTAACCC
TCCCCTGCTTTTGAGAAAACAAGTTAACCACATCCTGCAGGGGAAATAAG
GCTTTTCTGCCCCTGGCTGAGATCCTGCTGCCTGCAAGAGAGCCTTGCAC
AGCACACAGCAAGATGTGCTGCATTCAGCTTGCTCAGGTCAGAGCCTCAG
GCCCTGCAGACACCCAGAGAAGACCCTCAGCCCTTGCAGCAGCTGCGGGA
AATGTGCATGGCAAATCCAAATCCAGTGAAATGCTCATTTAGTGCATTCT
GCCACCACAGCACAATTCAGGGGGAGTCATTCACCAGGATTTTTATCCTG
ATTTTCCAATGACACCCAGAATCATTTTCTCAAGCATTTCACACCTTTTC
CCAGTCTCTCAGGCAGATTTATATTTTTAGAATACTCCCTTAGACAAAAA
CAGTGGAATCAGATGCACAGGAGGGAAAGGTCAATGATTAAGTGCTGGTA
TAATCCCATAGNCATAAAGTCCTGACGAAGTCTGGGACTAGGACTGGATC
CAGCCGCACCCTCTGACGGTGAGTGTTTCATTGACCTAAAGCCCTCCTTT
CATGGCAGGGCCCCAGATTGCCCCACTAAGCAGTGGCTTTGCACTTGGCA
TTTGCCATGCAGAACATGCAGCTCAAGAAAACAGGAGAATAGAATTGTTT
CCAGTGCAATAGTGAGATTGTGTTAGTGTGGGTAATTCCACAGAAGAGGA
GAGAATCTGCAGCTCTCCCAGCTGANACCAGCTGAGGAGAGTTTTGTAGA
GATACTCTGCTGCACATTAAAATCCCCTCTGTTCAAAGAAACACATTTGC
ATGTGGAATTATCCTGACATCTGAAAAAACAATATTGTCCAGTAAG
>oenMel1-111#LTR/Unknown	 
GGATATTGTAGTGAATACAGGGTCAGCAGCTGTAAGTTGAGAAGTTATAC
AGTTAAAAGATAATATTCCGCCCTTGTCCTTGCCCCATTTCCGGCCGCCC
TGAAAC
>oenMel1-113#LTR/ERVL	 
CCACTGCTCCCCAGGGATCGGACACCGCAGGTGGCCCCGGCCCCTCCATC
TTCTTCCTCTTCTTCCTCCTGATGGGATTGAGCCCCCGTCGCCGCCCGGC
TCTCCATCCCTTCTCCCTGCACCGCTGGGCAGAGGAGGGAGGGAACTGGG
AACTGTGTTGAATTTTCACATTACTCGTTACAAAGCAGAGTCACAAGTGG
ACCTCTGCTTTCAGCTTCAGACGTGGGAATCCAACGTGGGCACTCGGA
>oenMel1-116#LTR/ERV1	 
TGGGGAATGGGCATTGACAGATGCCTATATAGTATAGGCATCTTAGAATA
TGTATGACTTTTGTGAGTAGGTAGAGGGCTAAAAGCCTTTGGGAGGAATC
CCATGCTTCCACCCAGGGCTGGAATAAACATATCCTTTAGACAAACTGGT
TGAAAGGTATTCTGTCCTTGCCTTTCATGAATCATTTTGGCAGCTGCAGC
AGGACCTTCTCTTCCCATAGGAACAGATGGGAGTGTGACAACTCCAGGTG
CACCAGCCCGAGTCCCTCTTGGACAAGAGACCTCCACTCCCACCTGCTTC
AGTGTGGGAGACAGACAAGTGTGCTGGCCACGGACAAAATGGTATGATAA
TGATTTTAAAATTACCCCAGGGTGAGAGGGCTAATTGGGAAGACATAGAA
GGTATTCTATGCATGATGTGGGCTGAAAGGTATTGCGTGCCAGCAGAAAG
AACTGCTTAAGTTACTGGTGAAGGGATTCTGATGTGCTGTAGAGGGCTCA
AGGTGGTAAGTTCTGGGGGTGTGCTTGAGTGAATCCTGGTGTTCAAACTG
ACAGTGGAAGGATTTGTCATGCCATGGAGGGCACTGCTAGCAATTCTGGG
GGTGAGTTTGGGCAAATACTTGTTTAGTGATGCTATTTTGGCCAAAGCTT
GAGTGCGAGCCACAAGTGCCCAACCATCCAGGGAAGGGCTCTCTAGACAG
TTTGGGCTCCAACTAGGTGAAATTTTAGCTGAAGGAGGAGACTGGGCTAT
TGTCAAATGGGGGAAAGGGAGGAGGGAGAGGGTGTTTTGAGGGGGATTGT
AGTATAGTTGAACAAGTAATTATTTGGTTTTTAACTGGTAACTACCCCCA
GTTGAGAATAATCTCGGAAACCAGTAACGGTGGGGACTAATAGGGGTAAC
TCCTTGCTTTTTGTGTGGACCGATGATTTTTCATCAGGAACCAGAGTGGC
ATCCAAGTTGGGTCTTTCTCCACTGTAGAGGGTGCAACAAGTGATGGTAT
TTTATATCTTACAGAAGGAGACCTAGGTGCACTGGAGCTCCCGAGATGTT
ATATTTGGGAAGCAGCACACGATCAGTGTGAGACACTGAGTCTAGTCTGT
AGAAAAGATTTAAAGCTGGAGAATTTGGATACTTTTGAAAAAGACTGGGA
ATGGTGCCAGCTTGGAAAAATTAATTAGAAGACTCCCCTTGTAGTTTAAC
TTTCAGTATTTGAGATACGGGGCTGTATTTGTGGAATTTCTGCCTGGTCA
AATAGGAGAAGAAAGCAGCCAGCTGTTTGAGCTTTTGGAGAAGGGAGGGT
TTCGAATAACTTGGAGGAAAGAGCAGAACTAATCTCTGCTGCATATGCTC
AGTATTTTTGTAGCCCAAGACTACCAGGTATTGAACCATAGTATTCTGTT
ACAGACTAGACAATTGTATGTTTTGGAAACAATTTAATTTAGAAAGCTTA
GAAGCTAGAGGTTAGAAATGTAACCCATAAAGGTAGATAACTTAGTAGAA
GATCATGAAGTTGACAAAGATTGATTGTTTAACATTCAGAACTAGTTAAA
ATACATCATAAATTTTGACACGAAGTTAATGAGCTCTACAATGGAGGGGG
CAGCAGGTTAGGTAG
>oenMel1-119#LTR/ERVL	 
TTCCCCACCTGGACCCCGCCCTCCCCGCGCAACCACGATCCCCCCGCGGG
GTCCCCCCAAGTCCCTCCCCAGTCCCGCCCCACAATAAACGGGACCGGGG
CGCACTGGGAAGCTTTATTGGGAA
>oenMel1-120#LTR/ERV1	 
CAGGACAAGGAGAAGAGAGAGAAATCTCGGCAGATCTCCGGGGCTTTTCC
TCTTCCTCCATCTGCCCGCGCCTTGGGAATGAAAACTCCTGGTTTGGAAG
AAAAAAAACAAGAGGAGAGGGCCTTGGGCTGGGGGTTCCTCCTCGCCCAA
GTGCAACTCAGGAAGACATTGGGCGTCTTGCATGTATAAGAACATCCCAA
ACACCAAGATTCAGCCCAAAAATTCTCCAAAAATCACAACACAGATGAAA
AACCCACCAAAAAACAAGATTTGGCCAAAACCCCCTCCAAAATATAAAAA
TTCAGCACCTAGAAGAAAACACAAAAAACACCAACATTTAGCCCAATAAA
GCTCAGAAACACCAAGATTGACCCCTGTGAAAATCCTGGATCCCCCTCTC
TGGTCACCTGCTACATGTGATGGGGACAACGCTCCTGGGCTTGGGCAGAG
GCTGCAGGTACAGGGAGGGATGGAACTTTGTGCTCCTTCCTGTTTCTGTT
CCTCCTCCTCCTGTGTCCCTACCCTTCCTCACATTCATCTTCCTCCTCCT
ATTACTCCTTCTCCTGCATAATCCCACCTTTTCCTCCCACATGAATGGTT
TGACCATTTGCATTGGGATTTTTTCTGTATATATGTGTGCGGTTCTTAGT
GATGGCAAAATTTTGGTATGGGTTTTTCAATGTTCACATTTAGGATGGAT
TTTGCAAAACTGGAAGAGCCTTAAAGGTGATACTTTAACAGATAAAAAGT
TAATAGAGTATTGTTAATAAGAAAAAAAAAAAAAGCAGATTGTGGGGCAG
CCACATATGAGTCATCCAATGGCTGCTCTACAAGAGAAGCAGGGTTCCAG
ACAGCCAGGAGAGGAGCTTTAGAAATGCAAATTAACACTGCTGGGGTAAA
GTGTGGGCAAGCCACCAGGGTCTCCTTGCCTGGCGGAGGATTTGGGCTGC
TTCCCTCTGGCCCTCACCCCAAGCTCTGCCTGCTTGCACAGATGGAATTT
GCACAGCTAAAGGCAGAGCCCACAGTGAGGATACCTGACTGCAACAGAAA
TTGGTTAAGCTGCAAAGGGAAACAGCAAACAGAGAATGTTGTGAAAACTT
TACTAAAAAAACTGGGGGGGAATCATCCCTCTCCTCACTCCAACATGTGC
TGTCACTGTCTATGAGGAGACTCCAGAGCAAAAAAGATCGAGACAAGAGA
GGAGACACCCGAGTGGAAAGTGATCTCCCACCCTGGAAACCTCAAGCTAA
AATTGCGTCGGACAAGTAAATGAGCACCTTAGATCAGATAAGGTGTTCAG
TTCCTGGGTGCAGCTGTTTTTCCTTTTGTTCATTTCAGGTGCCAGATTTG
TCGTGAGGTTTGGGTCACACATTGTATATGGAGAATCAGGCCTAGAGGTC
TCTGTACTAAGTGCCTTGAGAAAGAGCTGTCTCTGACTGACCGAATTCTA
ATACTTGCCACCAAATTGAATAATATTGTACCGGAGTTGATCCAGTGGTT
TCACTTGTACCAACACGGGATTAGGGGAAAGCTAAATTGCAGGACGGTAA
TTTTGGAAATTGAGTGCCAGAAAGCAAATAAAGTACCTTGTTGGACAGAT
ACAGTAAAGTTATCAAGGTGGGATGCCTTTAAGGGACTGGG
>oenMel1-121#LTR/Unknown	 
GTAGTCTGCTTGGTTGCTTGTATCAGAGCATGTGGAGACAGTGGAAGTAT
CTTCTCTTTCTCCTGCAGAAAAGCAGAATTTTGACACTCTTCATCAGATC
TTTAAAAAGACAAAAATTACCCACTGGATGCCTTGTAAAAGTCATTCAAA
GCTTTCTTCTCACAGGAAATTACTTGGAAAAAGCTACAAAATTAATAATG
GGGCACACATCATATTCTCTACAGTAGCCAGTTCCAGGCTTCAGAAAGAA
GGCGAGGCCACTTTATTCTACAGATTCTACACTACCACAGTGTAAAGCCC
AGCTCAGCTTTTCTGTTTGGAAGGCATGAGGTGGCATCTGCACAGCCATT
CAAGTCACACAACAACAGATGCAGTTTCACAAAAGACAACAGCTTGAGAT
AGAGGGGGAGAGAGAGAGACACCAACATGGAGGTTCTAACAAGAAATAGG
CAAAAAAGCTGGAATTCTTCTCATGCCATGTTTTTATTGCCACTTCCTTT
CCCATTCCAAAGACCTAAAGTTTGGATGAAACCAAGTTTTAATGCAAAGT
TTCTGTACTCTTGTCAGCAGGAAAGTCACAGTATGTTCAATACAACTGCT
AATAACAGCTTTGCTAGGAGGATTTAATTTATAAAAGTGCATTTGGTCTC
ATGGCTTAGTCTACACAAAAGCTTCAGCCTGATCCCCAACTTAAAACACA
GTCCAGATTTTTCCTTCACCAGCTGCTCAGAATTTTGTAAAGTTGCTCCT
GAGGAACAATGCTCATGGATTTCTACATTCAAGCGGGAATCCTTCCAAAG
TCATCCCAAGGTTTGCTGGTACTGTGTGTATGTCCAGAAGAAATGTGGAA
AGACCATCTCAAAGCACATGCCTACAAGCACACCACCACTTGCAAGAGGC
ATCTGCACAGTCTAAACATGCCTCCAGGCTAAACCCAACTAGCAATTTGC
AAATTCAACCTCCAAAAGAGAAAACACACAAAGAAAACAACTGAACCCTA
CTGGGTATGTCCCTGTGATCAGACATCTTTTGCATTTCTGTTTAGCTTTT
CAATGTCATTTTCATTTGGAGGTACTTCAAAATCTTTGGAAGAAAAGAAT
TCTGCAGCTAAAATGCAGAGGAGCTCATGGCACAGCTCAAACTAGAATTC
CAGGAAACCCCAGCCCAGGTTTGTAGCTTTTGGTGTTTCCATGGAAAGGC
TGTGTTCAGTGAACAATGATGAAATCATTGAGATTTGATCTACACGTTTC
AGAAAACTAGTCTGCAAAAAATGTGTCATGGGTTTCTATCTTTAACATGC
AGACTTGAAAACCTGCTGGTGGAAAAAGTGGTTCCACTATCAACAATGAG
TTTACTGGAAATCAAATGAAAAGAAAACATCCACTCTCTGGGAGTTTCTA
GTGCCAGGCACTTCCCTTTTACCAGGTTATCACAACAGCAATCTATTTCA
CAATTCTTTCCTCTTGATTGGTTTTGCACTACAGAGGGAGAATTTCTAAA
GATGAAATCTGGCAGTAAAACACTGCGAAAATCCCCAGTACAGACAAACA
CCCAGAAACATCAGAAACTGAGTAGCAGACAAAACTGCTGGAAAGGTGTC
AGGACAAAGCATCTTGTTGCCAGTTCTATCCAAAGATGTGAACCTTTCCA
AATCAGTCACAGAACACCCTAATGAAAACAATCAATTAGCAAAATCCTTA
AATGTCTGATTTAGTTGTGAAGGGTAGTGGCCAACAACAACAAGTTAGAG
AGCCTCAAACAATAATGAGTCAAGCTATAGAAGACAAATATAAAGAAATC
CATTGGGGTGTTGAGGATTCAGTAGACAATTAGGAAAGGCAGCTACTTGG
TGTTAGGCTGACATTGACTGTGACAAGTGAAATAAATAATCTACTTGCAG
AGCAATGCACAGTTTTACAAAAGACTGCCATGAGAGATTGCAGGAAAAAA
GGAAATAATGAGAATTGACCCAGCTCTCCAGAGGGAAGTCAGCCCCAATG
CAGGGGGAACAAGTGTGGAAAGGAGAGTCAACTGAGAATTTGAAGTTTAG
ACTTGCAAAAGCATGAAAATATGACTTCTTTATGCTGTGTAGAATTAGGT
AGAAGAATTGCCATGAAAGAAAAGATAAGTCATGAAGGGGTAACCATGAA
AAATCCTCAGTCTCAGCCCACTCTTGTATTCTCTGCCAAGCAGCAGCAGG
CACCAGGCCAAGGGCAGGCACCCCAGCAGAATTCAGCCCATGGTCCCCAT
GGCAGAGTTCCTTGTGCTGCTGCACACAGAGGTGTAGGAGCACCACTGCC
CAAGGAACAAAAGGACCCAAGTCTCAGGGTTTAAGAGGTGACATTTTCTT
GAACTTCACTTGAAGGAGGACAGAAGGGCAGCAACAGCTCAGGTGTTCAA
TCACAAAACAATCCAAGATGTGTCAGGTACAAGGGCTTAACATCTCTGGC
ATGGAGAAAATTGAGGAAGTTCAAAAATACTCTCCAAGGAAGAAAGGGGC
ATTCAGAGCCCCATCTGAGTGTACCAATTATTGTTCTCCCTCCGGCAATT
TCATATCCTTCCCCAGAAGGTGGTTATGGCATTGCTGGCCACTCCTCTAC
CCTGTCAGCTGAATAAACAAACGTTAGGAAACTTATGAAAAGACTGGACT
TCAAAGTCCACAAAGGTCTTTGCAGGAATCAACATCAGTGTATCTCTAGA
AAGTCTGGTTGTGACCTTTTTTGAGACTAGTTTTGAGAAAAGTACAAAAC
AGAGTTTCCATAGGGACGCATTCACCCAATTTCTCCTTAGAAAACAATTG
AAGTGGAAGGAATTTCAGGAAAAAACCTTATTCTTATCATAAAGAATTTT
TATTTGCTACAAAATTTTCTGAAAAGCTGGACAGCTTCATAGCAGAGGTA
CTGGGCTTCTAAACTCTACTGATAAAATTAATTCAGTGGACAAACACAAG
TCTTGAAGAACAGAATTGACCACAAGAAATCCACTCCAAATATGATGTAA
ATGACAATAAGAGAAGGAGTTAAGAATATTGCAATATCTTTATTATAAAA
GTTCACTACTAAATTCTGTCTTCGTAAACAAACTCATCCTAAACTTTTTA
ACAAGTATTGATCTACTCAGTGCTAACTTGAATAACCCTAAAACAACTGA
TCTTCTTTTTGATGCAGAGTTTAAATTTCAGGTCCTGTGCTAAAAAAAAG
CCTTGAGGCAGGCTCTGAATGTTACTAAGCCCAGCAGGTCTGGTTTTACT
CATGTAAAACAGTAAAAATACACTCAGAGATACTTGACTGTAGAGATTTT
TTTCTCTGTGAGGCACTGCCCTTTTGGGAGCTTTGCAAATAGGGACATAT
GATAATGATAATGATAATGATAATGATAATGATAATGATAATAATGATAA
TGATAATGATGATGATGATGATGATGATAATAATAATAATAATAATAATA
ATAATAATAATAATAATATACAGGCCTATAAACAAACTCCAGACAAGTCT
GAAAACACAACTACAAAAAACCCAAACCACATCAGCTTCACAGAAGGGCA
AAACTCATTAATGCTTAAAGCCAATGATGGGAGAAAAATTTTCTTCATTC
CCTTCTAACTCAAATCAACACAAGTGAGGTTTACCAAGCTCATGGTACAA
ATCCACTATGAGGTGGCAATGAGAATAATAGACACCATTTCCAAACACTG
TCACACCAATGCTTCTGCTCCTCTGGGCCTGAACACCTGGTTCGTTTGGA
TGAGAAAAACTCCCTGCACATGGCAATAAATCCTTCAAAACCCGCAGAGA
TTAATTGCTACAAGCAGTAAATCTTTAACACGTTGAAATTCATCACAAAG
ACAGACAACAACTTGTGCCAGGGATGCATCCCAGGGCAGATGCACCTGAC
TGGTGTGCTGGTGTGCTCTGAAAAGGAAACTACAGATGTCTTTCAACATT
TTGGGAAGTACC
>oenMel1-121#SINE/tRNA-L2	 
AAAAAAAAAAAAAAAAAAAAAAAAAAAAAGAAAAAATAACCAGAAGAAAA
AGGTGACAGGGCAGCACAAAGATTGTTCTCTGTGCAGCGCCCAGACTCGG
GGCTCGCTCTCAGCTTTGCTAGTTCCCGTGAATTATCCCACAGCCCCCAA
TTATCTGCTCAGTTCCTGCTGCCATAACCTCACAGTGCCTCACGGAGGGT
GGATATTCCCGTGCAGAGCTGCCCCTTGAACGCCAGCTGTGCCAGGAACG
GGCAGAGCGTCCAAGGAAGCTCAGCAGCATCGGGACAGGGACAGGCATCT
GTTCCAAAGAATTGGCTATTTAAAGCCCTCATCCCCCAGCCCCGCCCATG
TCCCTGGGGGCACTTGACAGAGCTGCCTGGAGTCCAGCTGATTTAGCCCC
CCTGAGCCGGGGCTCCAGGTGATATTTTCAAGCAGGAGAAGGCAGGGCCG
GGGGCGCTCCCGTCCCGTGCCAAGGCAGCTCCCCGTGCCCACGGGAGGAC
ATCTCTCCCTGCAGCAGCTCAGCTCCTTTCAGAGCCTCTGCAAGTTCTTT
TCCCTCAGCAAAGGGTGCACATCCCTGCCTTCAGCACACCTCCAGTGGGA
CCCACCTGGGAAAGCTTTCCATCCCTTCTGCACTTCCAGCTGGCTCCCTG
GAAACTCCCACCTTCGTCCAAACAAAACTTCATCCCACCTGAACCTTTGA
TTTGAAGGCATCTCTGCAGGCTGTCGGTTGGCATTTAATAGCTGTGAGGG
AAGACTGCCTTGGCTTTAGTGCTGCTGCTGCTGAACGAGGCCTCAGGCAG
GAAGGGAAGGGAAGGCAATTGGGGTGGACAGGACATACCTGGCAGCTGCC
TGGGAGCTCTGGGAGGCTGGAACCAGGAATTGCTGTCTGAGCCCCTCTGC
ACGCAGCCCGTGCCACCATCACCAGGACACGCCAGCTGCTCCTTGGGCTG
CTTTTGGGCTGTCAGTGGCCTGTATCCAGGCTGAAGCATCTCCAGGAGCC
TGCTCAGAGCAGCCCCTGGCCCGGGAGCCACGGGCAGCCCTTGAGCCGTG
TCCGTGCCAGCGCCGGCCGGGCACCCAGCGCCCATCCCGGGCCGTGTGCT
CGGCACGGGCAGGACGCTGCAGGCACAGCCCCTGCCCCGAGGGCCCATGG
ACAAGAGGTGCTGTTCTTGGAGTTGCAAAGCAAGGGAGAGGGGGAGCGTC
GCACCTAGCAGGTGATGGAGAAGCAGCCCGAGCGGAACCGTGCCCGGCCC
CGCCGAGCGGCTCGTCCCGCGCCCCAGCCCCGCTCGTTCCGCAGGGGTGC
GCGGGCAGCAGCCCCGGGGCTGTGCGCGCACGGGAACGGGGAGCCGGGCG
CTGCTCCGCGCTCAGGGCTGCGGGGCCTCCGCGGGACGGGGGCACCGGGA
GCGCCGGGATGTGGGGCTCCCAGGGCTGGCACGGCGCTCCCCGCGCCCCG
GCCGGGTCCAGCCGCGATGCAGCGTCTACACGGGGAGATCCCGCCGCCGT
TCTTCCGGGCGCGGTTACCGGCAGAGCCCCGGCTCCCCGCGGCCACAGCG
GGACCGTGTCCAGAGTGCCGCGGCCGCCGGAACGGAATGGGAGCGGCAGC
GCCGGGCTCAGCCCCAGCGCCCGTCCGGGGCGGCTGCTGCTGCTGCTGCC
TGCGGCGATCCCGATCCCGGCCCCGCTACCCGCACCCTGCCTGCCCGGGG
AGAGGCGGCACCGCCTGGAACCCCCAGCCAATACCGCCAAAACCTAGACC
CGACCCTGGTCCTACCTGAGCGCCCCAGGATTCGCGCAGAACCGGGAGCT
GTCCCTGGCGCGGCGCTCCGACGAGGATCCCGCCGCATCCCAGCACGAGT
GTTCCCGAATGGAACGGGCCGGGAGCGGATCGGCCGCATAGAAATAGGCC
CCGGCCCGCGCAGCCGCACTGGGGCCCCGCGCACCTGNGCCGGGCCCGGC
CCCGCCCCTCAATCCCCGCCCGGCCCCGCCCCTCGATCCCCGCC
>oenMel1-123#LTR/Unknown	 
ATCACTGTGTCTGAAGGACTGTCTGTCCCACCAGGCTGCTTCTCCATATA
TGGAGAAGTCAGTTGCCCAGTAACAAGGCGAGCTTGTACTGTG
>oenMel1-123#Unknown	 
GTGGGAAGGGCGGCAGTGCTGCCGCCTTGTGGGCACAGCGCGGTACTGCA
GCCGCCCC
>oenMel1-12#LTR/ERV1	 
GTTTTCTGGCGACCGCGGCAGGACTCCGGAGGCGGCTGGGGCGGTTCGCG
TTCTGATCCACTCCACGCCGGCACCGAGTGATTCTCGGGGAGTCATCGGT
TCGTGCCCGACCCCTGCGCCTGGCGGACGACTGCGAAAGGTAAGCCCGAA
GGTGCTTTATTTTCTGGTTCTGGTTTGGGTGCCTGCCCATAAGACGAGGC
GGCGATCCTCGCCGGGTTGGGCTAAAGACGTCTGGTTGGTCTGGTAAGCC
TAGGCGCCGGCTGTCAGACGCGGCGAAAGCTGCGCAGGTCCGGCACTTGC
CCCTCGCGGCGTCGAGAAGCGGCAAGTTGGATTGGTCTGGTATTGGTCTG
GTATTTATTTATTTATTTATTTTTGTTGTGTGAGTATGAGTATGTGGTAT
GTATGATTGATTCTGTTAAACTGTCAATATTGATTGTGGTTATTATTGTT
TTGTACGTTGCTGCATATTGGTTGTTGCGATCGGTTGTCGAGTTGTTGTA
CAGTTGTAAGTAAAACCGGTTCAAAATGCCACTCAAGGTATTTAAGTCTG
TGGTTCGGTTCACTAAGGGTGTACCCGAAAATACTCCGTTAGGATGTTTA
TTGAAAAGGTGGAAAAGTGAAGGGTTTTTCCAGGAGATGAGTAAGGATAA
GATGATTGATTATTGTAATCATTGGTGGCCAGAATATGAGCGGGAGGGGC
CATCATGGCCGGAAAATGGTACTCTGGATTATAATACCCTGAATTCATTA
ATGCAGTATTTGAAGGAAAATGAAAAATGGGATGAAGTACAGTATTTAGA
CTTGTTTTATTTACTGCGCCGTAAAAAGGAGTGGCAGGCTGAATGTGGAA
TAATGGTATTGGAGATGAAAGAATTTGAGTGCGGGGGTTGTAAAGAGAAA
TCTAAATGTGTTAAGTGCTTGGCCTTAACCTCTCGACCAGAAGAGGATTT
GTCTTTAATGGTGTCACCCGGTGCGCCTTCCGCTTCACCCCCTCCTGCTG
TCTCACCCCCTCCTGCTGTCTCACCCCTCCCCTGTGTCTCACCCCATTCC
TCTTTGTATCCACCGTTACCAGAAAGCAGTGCAGAGGAGGAGGAGGAGGA
GGAGGAGGAGGTGGCAAACATAACAGTAGTACCAGGGAATGCTAAAAAGG
TTGTGTGGCTTTGGACGTGGNAGGGCAGGATTCCAAAATGCTGGATTTGG
AGGAAGGGGAATGGCTTTTACCGGTCCCCAGCAAGGAGGGATTGCTCCCA
ATCAGTGTGCGTTCTGTCGCCAAATTGGGCACTGGAAGAATGAATGTCCA
GTAAAAGCTGGACTGGGAGGAATGTCGGGAGGAGAACAAACAGGCAATTC
CGCTGGATACCCCGCGAATCCAGAAGGGGTCGCTCAGGCTTTTGTTTTGG
GAAATTATCAAAATCAGAGCTGACTAGAGCAGGATTTGAAGGTTAGAATA
GACATAGATGGGGAAGAGCAAGAATTTGTAGTAGATACAGGGGCAACGCA
TTCAGTTTTAAATAAAAGATTGGGACCTATTAGCAATACTACCATACAGG
TAGTAGGGGCCACAGGACATTTGGAAGAAAGACCCTTCTTACAACCACTA
AATTTGAAATTTGGAGGGAAGGAATTAGACCATCAGTTTTTGTATATGCC
TAATTGCCCCAAGCCATTACTGGGCAGGGATCTATTGTCGTTACTAAACG
TCAGAATTATATTTGAGAACGGAAGGGTAAAATTAGAAGTTCCGGGAGAA
GAAATTGCTAAATTATTTGTAATAAAGGAAATTGATCCCTCTCCTATCCC
CATCGAAGTGGATCAAGCTGTAGTACCTTGGGTATGGGAGACGGGGAACC
CTGGAAAATCAAAGGCTGCCCAGCCAGTGGTAGTAGAATTAAAAGAAGGA
TCTCAGCCAGTTAGAATAAAACAATACCCAATTAAATTAGAAGCTAAGAA
AGGTGTTGCTCCTTTGATAACCCAGTTTCTGGCACAAGGGATTTTGCAGG
AATGTGAGTCAGAATTTAATACTCCTATTTTTCCAGTTAAGAAACCAAAT
GGTAAGTATCGGTTAGTGCAGGATCTAAGGGCAATTAATAACATAGTAAA
AGACATTCACCCGGTGGTTGCCAACCCTTATACTTTGTTAACATCTGTGT
CGGAAAAGTTTAAATGGTTTTCTGTTATTGATTTAAAAGATGCTTTCTTC
TGCATCCCTTTGGCATTGGAGAGTAGAAAATATTTTGCCTTTGAATGGGA
AAGCCCTGACACTGGAAGGAAAAGACAACTTACATGGTCCCGCTTGCCAC
AAGGATTTAAAAACAGCCCAACAATATTTGGAAACCAGCTGGCGAAGGAA
TTGGAGGAATGGAAGATTGCTGAGGTAAGAGAGTCACCTTTCTCTTACGT
CATTCTCCAATATGTGGACGATATATTTCTGGCAACAGAAGAAAAGGAGG
TATGTCTTAAGCTAACCATTGCCTTGCTAAACATGCTGGGTCAGGCTGGG
TACCGAGTGTCAAGGGAAAAAGCACAACTGGTAAAGGAAAGTGTAATTTA
CCTGGGATGTGAAATTGTTCAAGGCCAAAGAAGACTGGGAGTCAATCGAA
TAGAAGCTATTTGTGCCATACCCCTCCCAAGAAATCATCAGGAATTGAGA
TCCTTTTTGGGAATGGTGGGGTGGTGCAGACTGTGGATTTTAAATTTTGG
ACTCCTAGCCAAACCATTATACGAGGCCCTGAAGGAATCACAACTAAACT
GGAACCGACAGAGGAAGAAAGCATTTGAGGATTTAAAACAAGCCCTTAGG
GAGGCTCCAGCACTGGGCCTCCCAGATTTAAATAAAGACTTCCAATTATA
TGTAAACGAAAGACAAAAATTGGCATTGGGGGTGCTGACCCAAAGACTTG
GATCCTGGAAACGTCCAGTAGGCTACTTCTCAAAACAATTGGACACTGTT
AGCGCTGGTTGGCCGTCATGCTTGCGGGCAGTTACGGCCACAGTGATCCT
CATTCAGGAGGCCAGAAAATTGACTCTGGGAAGGAAGATAGAGGTGTTTG
TACCTCACATGGTACTGGCAGTCCTGGAACAAAAGGGGGGTCACTGGTTG
TCATCCAGCAGAATGTTGCAATACCAAGCAATCCTGAGAGAACAGGATGA
TGTAGAATTGAAAACAACTAATCATATCAATCCAGCAGAGTTTCTCCGCA
GTGAGCAGGAAGAAGGGGAATTAGCACACGATTGCATGGAAGTTATCGAA
CAGGTGCATGCCAGTCGGATTGACTTGCGAGATACCCCGATGGAAAACCC
AGACTGGGAGCTGTTTACTGATGGATCCAGCTTCGTGGAAAACGGAACCA
GGTATGCAGGGTATGCCGTGGTGACTGTTAAGACGGTGGTAGAAGCAAAA
GCCCTAACTCCTGGAACCTCTGCCCAGCGAGCTGAAATTATTGGACTTAC
TAGAGCTCTAATCCTGAGCTGGGGAAAGAAGGTAAATATTTGGACTGATT
CTAAATATGCCTTTGGAGTTGTGCATATTCACGGTGCTTTGTGGAAGGAA
CGAGGACTGTTAAACTCTCAAGGGGTCGCTATCAAATACAAGAACGAAAT
CCTAGCCTTGCTAGATGCAGTACATCGACCCGAAAAGGTTGCTGTAATGC
ATGTAAGAGGACACCAGAAGGAAGATGGGAAGATATTTGAAGGAAACCGA
TTTGCAGACTACACAGCTCGTGAGGTGGCAAGAAAGGTATGGACTCAGAT
GGCTCTGATACCTACCAAGGTGAGTCCAGCAACTCCGTTTTTAACCCAAG
AACCAAAGTATTCCCTAGAGGATGAGAAATTGGCATCGTTGTTACTTGCT
CAGAAGAATATGACTGGATGGTATGTGACAGGGACAGGACAGGTGGTGGT
GCCTGCCAGAATTATGAAAACGATTCTGGAAATGGAACATAACAAATGTC
ATTGGGGAGCAGAGGCATTGGTAAAATTTCTAAAAAGAGAAGTAATTTCT
AACCAGATGTTAACATTGGCAAAACGGGTGAATGCCATGTGTCCAACTTG
TTTGAAGAATAATCCAATAGTTAGGAAACAAATCCAGCTAGGGAAAATAC
AAGTGGGACCAGAGCCAGGAGATTATTGGCAAGTAGATTTTTCAGAATTA
CCGAAAGCACAGAACTTTAAGTATCTTTTGGTGTATGTATGCACCTTTTC
AGGCTGGCCTGAAGCCTTTCCTTGTCGAACAAATCAAGCGAAGGAAGTAG
TCAAAACACTGTTGAAGGAAATCATTCCGAGATTTGGGGTGCCGTTGGGA
TTGTCATCAGATAGAGGCCCACACTTTATAGCAGGAATAGTACAAGAGGT
GGCTAGGATGCTAGATATATCTTGGGACTTACACACCCCGTGGCGACCTC
AATCAAGTGGCCAGGTAGAGCGGATGAATCAAACGATTAAGGGACAAGTC
AAGAAAATTTGCCAAGAGGCAAAAATACAGTGGCCACAGGCTTTGCCATT
AGCATTGCTCAGAATCAGAATCAAACCCAGGGAGCGATTGGGAGTTAGCC
CATATGAAATCCTATATGGGAAACCATACCATGCTAATGTGTTGAAAGGG
GATTTGCATGTGCAGGGTGATCAGACAATATTCGGTTATGTCATGTCATT
AAACAAAACTCTTAATGCCTTAAGGGGAGCTCTGCAGTGGAACCGACCTA
TGCCACTGGAAAATCCGGTGCATGACATTCAACCGGGAGACCGAGTGTAT
GTGAAGAACTGGTCCACCCACCCCTTGAAAGAAGCATGGGACGGCCCACG
CCAAGTGATCCTGACAACCTACACGGCAGTAAAGGTCGAAGGAATCGACT
CATGGATCCATTACACTCGGGTCAAGAAAGTCCCCGCACAATGGGAGACT
CAGTTAGTCTCTCCAACACGGATGATTNTTCGCGGAAAGTAGCGTTTTTG
ATTATATTGTTGCTGGTAATAACGAAACCAATTCTTGTTAATGGTTCTGT
TGTAGTTGCAGTTACTGAACCAGTGGTTGGTGTTATGGACGGAATGGATG
TGAACCTGACCTGTTTTATAACNAATGACCAGAAAACTGAAGTCCGGAAT
GTACAGGCAACCTGGAAGAAAGGTGCTGATTATCCAGAAGCAAATATTGT
CACGGTCTGGGATAAGGATGCACAGAGAGGAAATACCACATTACTACTGA
AGCAAGTCAGGCAAGAGGATATGGAAAATTACATGTGCATTGTAAAATCC
CGAAAAAGCTTTGATTATAAGCAAATTAAATTGAGAATAGTATCCTGGAA
ATTGAGAAAGGACACTCCATCCCAGGAATCCGTAGAGGTGAAACCCTCCT
GGACTGTACAAGGTATGTGGGATGGACTTCCTTTGAAGGTGAACTGTTCA
TTTGCGTTAAAACAAGAATGTAATCAGACATTGCAAGTTAAATGGTGGAA
AGAAAACANTCAGAAGTCATGGGACAGAATAGACCAAGGAATTAGCTGGT
GGGAAGAATCTGGAAAAGGTATGGGATGGTTAAATATTAGTAACCCNCAA
ATTGGCTTTACTGAAGGAAAATACTTGNGTTTAGTGATATGTGAACTTGA
TGCTGATTATGGAATAAGAATAGTAGAAGCTGGACAAGGAACCAGGCCCA
CTCACATGGTATCCCCGGTAGAAAAGAAGCGCAGAGAGCTGAGAGATATA
GAAGCAGCTGTACATCAAAGTCGCGAACAAGAAAATTTGGTAGTAGGGTT
AATTAGAGATTTTGGAATGGTGCAAAACGTATCCCGAATTACAGCATGCC
TGCCACTTCCACAAGCGGCAGGAGAACCAATTCCATGGGGAATAATTCCC
GTTCCATTACTACCTAAAACGGCAGAAAACACGTCTACCGTATGTCACAT
TGAAAGGAAGGAAAGAGAAATAGTTACCGTCAAAAAGGAAAATGTATGGC
ATGCAGCACTGTATGCTGCTAGAGATGTAAAAGTTAAAACAAAGCAACCT
TACCAAGAAGTTACGTGTCAAAATATAAGCCAACAACATGTGATTTGGGA
TGACTGGAAAGCCGTATGGGGTCCGAGCTTATTGGAACATTACAGCTATA
TTGGAGCAGTGAACTGGTGTATACAATGGACAGGAAGTAAAAACCAAACC
CTGGTGGAAGTCTATAAGACAGAAACCTCTACAAGAGAAATTAAAGAAAC
TAAAGAAAATTGGAATTGTACTAAGGTTATTACATGTGATACCCCAGAAA
GTCAGATCAGTCTAGCTCCTCTTAGAGTACTACTCAAGTGGGGATGTGAA
TGTAGGAAAATTAATCATACAATTGTGGGAAGAGTAGCCGCACTAAGCAG
AAGCGGAATTAAAAGAGCTGTAAGTTGTAGGGATACTACAATTAGAAGTC
CAGGAAATTTAGTTTGGGTAATGGGACATGGACAATGGACCACACACATT
CCTATAGATGGGCCTGTGACACAAATCACTCTAGGAGTCCCCACCCTTTG
CCCTCTGTGGAAGCAATCAAAATTACAATCCAACCGGAAGAAAAGAGAAG
TAGATGCATTCACTGAGTTAGAAAATGAATGGCATGAACCAGATGGTGGA
GTTAAATTTGGGTGGGCTTTAGAATCACTATTTGCACCTGTAGCCGCCTA
TAGGAACAGAGAAATGCTGTACAAACTGCTAGGGCAGACTGAAAGATTAG
CAGCAGCCACTAAAAAAGGATTCAAAGATATGAATTTGCAATTGCAAGCC
ACGTCCCGAATGACTTTGCAGAATAGAATGGCATTGGATATGCTCTTGTT
AAAAGAGCATGGTGTGTGTCAGTATCTAAAAACAAAAATTGACCATTGCT
GCATCCATATTCCAAACATGACCATTGAAGTGGAAAAGGATATTTCTCAA
TTAGAAACAGTTGAATCCAAAACAAAAGACATTGAAAAGGAAGCACAACA
TAATTGGATCGGAGAAATTTTTGAATCTTTAGGACTTCAGGTTTCTGGTT
GGGTTTCGTCTGTAATACAGTACATTCTGTTGTTTGCAGTTCTATTATTA
ATTATTTGGCTAGTGTATAAGTGTGTTTTAGGAGTCATCGAAAAGGAAAC
AAAACGCACCAGAAGAGTGATAAAAGCCTTGACAAGAACTGACGAGATGC
ACCTGCCTCCTCCGAAGTATGAAGTTGCTATCGGGCAAGAAAATCCAGCA
TTTGAAAGACCCGATAATGACTGAGAGTTGAGCATCCTTGCAGAAGACTG
AAGAATGCTCAAAAGGGGGGAAA
>oenMel1-134#Unknown	 
GCACAGCCGAGCCGGGCGGAGGTGGCAGCGGCTGCACCGGCGAGCGCTGC
CCCGTGTCACCCGCTGCCGGAACACCCCGGCACACACACCGAGCCGCCGG
CGGAATCTCACCCAGCCAGGGAAGGCGCCCGTCCCCCACTTCGCCGCTTT
CCGCCGCCAATCGCCCGGGACATCCCCCAGTGTCCCTGTCAGCACAGAGG
ACATGGCACCAGACAATGCTGGGACNCTCTCTGCANGACAGTTTAACGCT
CTTGCCTTTAACTAGCCCAGGGTNTGCACAGCCAGAGGCTTCATGGCTCA
TGGGAGGAGGGGATCCGAGCTGCCGCGTGTGGCAATGATTCCTCCAGAGA
AAACCTCTGTNTCCAATTTGCATAGCAAATTTCCTGCAAATTCCAAGTCA
GAATAAAATTTGTCT
>oenMel1-137#SINE/tRNA-L2	 
CCCACAGAGCCGGGGAAGGGCTCAGGGGCGTGCCAGAATTGTTTTCCCAG
GGGCCTTTGGCCCTCTGCTGTGAGACAGTTGGGCTGTACTAAAATGGCAC
TGCCATACGAGGTGGAGGTGCCACTCTTTGTGGAGCTGTGAGGTGCATTG
TCCCACCCATGTTGTGTTTGTTTCTACAGGGGTATCAGAGCACTTATTAA
AGGGAAATGGGGCACACTGAGTAATTCAAGATAAACACACAGTAGCATTG
TCACAGGAACTTCACCCTGTGCCTTAGATTTTGCCTATTTATGTATCCTT
AACACAGCAGGACTAAATCAATTGATAAATGCATATCTTTGTAGCCTGCA
GTGCTCAAGGCTTCCCTCCCCTATTCCTGCTCCTCCTGCACCCCTCACCA
CGCTTCCTAACTAGTGAAATTAAGTTCTGGTGAAAGTTTTGGAAAAAGAA
GCGTAGAAACAAGTGCTTACTTGTTACAAGCTCTACTATGAGTTTTCCCC
AGCTAGGAGCAGCACAGAAGTGAGACAGGGGCAATGACATCAGGGAACAG
CTGTAGAGTTAAAGGCAGAAAGAAAAGACTTACCAGCAAAGGGCAGGAAA
GGAGAAAGGTTTCAGAAAAGATTTTGGTGGTCTAATTAATGATCATTTCT
GATTCTCCTGTGAGAAGAACACAAACTCACAGCCAGTCAGGCCTCACAGT
CCTCTGTAGTGAGAGTTCAGCACACATCCCAGAGGCAAGTCCAGCACCTG
AAACAAAAAAAAAGAAAAAAAAAAAAAAAAAAAAAGAAAAAATAACCAGA
AGAAAAAGGTGACAGGGCAGCACAAAGATTGTTCTCTGTGCAGCGCCCAG
ACTCGGGGCTCGCTCTCAGCTTTGCTAGTTCCCGTGAATTATCCCACAGC
CCCCAATTATCTGCTCAGTTCCTGCTGCCATAACCTCACAGTGCCTCACG
GAGGGTGGATATTCCCGTGCAGAGCTGCCCCTTGAACGCCAGCTGTGCCA
GGAACGGGCAGAGCGTCCAAGGAAGCTCAGCAGCATCGGGACAGGGACAG
GCATCTGTTCCAAAGAATTGGCTATTTAAAGCCCTCATCCCCCAGCCCCG
CCCATGTCCCTGGGGGCACTTGACAGAGCTGCCTGGAGTCCAGCTGATTT
AGCCCCCCTGAGCCGGGGCTCCAGGTGATATTTTCAAGCAGGAGAAGGCA
GGGCCGGGGGCGCTCCCGTCCCGTGCCAAGGCAGCTCCCCGTGCCCACGG
GAGGACATCTCTCCCTGCAGCAGCTCAGCTCCTTTCAGAGCCTCTGCAAG
TTCTTTTCCCTCAGCAAAGGGTGCACATCCCTGCCTTCAGCACACCTCCA
GTGGGACCCACCTGGGAAAGCTTTCCATCCCTTCTGCACTTCCAGCTGGC
TCCCTGGAAACTCCCACCTTCGTCCAAACAAAACTTCATCCCACCTGAAC
CTTTGATTTGAAGGCATCTCTGCAGGCTGTCGGTTGGCATTTAATAGCTG
TGAGGGAAGACTGCCTTGGCTTTAGTGCTGCTGCTGCTGAACGAGGCCTC
AGGCAGGAAGGGAGTCCGTGCCAGCGCCGGCCGGGCACCCAGCGCCCATC
CCGGGCCGTGTGCTCGGCACGGGCAGGACGCTGCAGGCACAGCCCCTGCC
CCGAGGGCCCATGGACAAGAGGTGCTGGATGCCTTTCGGGGACTCCTGGC
CTCCTCCTGCCCCCTGTTCCCCGCAGCTGGGACACACAGAAACAACAAGG
AGCATTGCTGGCAGTGAGTGGGAAGCACTGAGACCTCTGTGCAGCTTGCT
GGAGCCAAGGATTCCCATCCTTGGGAGTTTCATACCTGCGATGCAGAGGG
CTCAGTCGGTCGGAGCACGGTCCAGGTAGCGCCAAGGTTGTGGGTTCAAT
CCCCGCACGGGCCGTGTCACTCGAGAGTCGGATTTTAGGANCCCTCTCAA
TCCCAGAATATCCTGTGACCTGGAAGCAAAGGGGAAAAGCCGCAGCCGAG
TTTTAATAAAAGAGGTTTTGCCACTGCAGAGCTTCTTGGAGTTGCAAAGC
AAGGGAGAGGGGGAGCGTCGCACCTAGCAGGTGATGGAGAAGCAGCCCGA
GCGGAACCGTGCCCGGCCCCGCCGAGCGGCTCGTCCCGCGCCCCAGCCCC
GCTCGTTCCGCAGGGGTGCGCGGGCAGCAGCCCCGGGGCTGTGCGCGCAC
GGGAACGGGGAGCCGGGCGCTGCTCCGCGCTCAGGGCTGCGGGGCCTCCG
CGGGACGGGGGCACCGGGAGCGCCGGGATGTGGGGCTCCCAGGGCTGGCA
CGGCGCTCCCCGCGCCCCGGCCGGGTCCAGCCGCGATGCAGCGTCTACAC
GGGGAGATCCCGCCGCCGTTCTTCCGGGCGCGGTTACCGGCAGAGCCCCG
GCTCCCCGCGGCCACAGCGGGACCGTGTCCAGAGTGCCGCGGCCGCCGGA
ACGGAATGGGAGCGGCAGCGCCGGGCTCAGCCCCAGCGCCCGTCCGGGGC
GGCTGCTGCTGCTGCTGC
>oenMel1-13#LTR/ERV1	 
TTTAATTGGCGTCACGGACAGGATTCCCTGATACTGGAGGAGTTGGGGGT
TTTCTGTGCACTTTGTACCAGGGGAAGACCTGTGCCATTTCAGCAGCACC
CAGCCTGTCAGTACTGTGAGGACTGAACAGTATTGGAAAGCAAGGGAGGT
GGTATTGGGTTCTTCCCACAATCTGCACACAGACCCAGGTAGATAATCAA
CTCCATTTCAGTTATCGGAGAATTTTTGTAAAGGATCTCAAATGTGCAAA
AGATGGGACTTGTGTTTTTGATGTGCATGTGCTGTTGAGCTGCTTGTTGT
AGTTGAGGAGAGAACCTCCCAGGCAGTTTTTGATCCTCTAACCCAGGCAG
GGAAGAAAGGGGATTGTCCTCAGCTAAATGCTGGGTGTTTGTTGTTTTAG
ACCTCTAACCCAGGCAGGGAAGAAAGGGGATTGTCCTCAGCTAAATGCTG
GGTGTTTGTTGTTTTAGACCTCTAACCCAGGCAGGGAAGAAAGGGGTTGT
CCTCAGCTAAAGGCTGGGTGTTTGTTGTTTGTTGTTGACTACTTGGGATT
GATACCGAAATAATGAGAAAAAGGACTAATGTAGATATAGTAGTAGTCAT
GCTAAGGCTTAGAAAACTGCAGTTCTCGGACAGGCCCTGGGAACCAGCCC
TGGGAATGAGCTGGGGACTGTGAAAGCAATAATTAAAGATAATTAAAGAA
TCTAGTAGAGCGTATAGGACATCTAGAAACTTTCAAGATAATAAGNAATC
AGTAGGGCATANAGAACATTTAGAAACTTACAAGATAAGGCTAAAGTATA
ATAATAAATAAAGGGTTCTGGTGATGAGAAAACATGCAAGGGGGATTAAG
GGGGGTAGCCTATAGTTCTGAGTAGACAAGCATACAGAATTTATAACTTT
TAGGAATAATATCTACAAGATTTATGTATCTGTATTGTCTTGAAGAATGT
GTACTTTGGCAAGTAGACCATTTTGTAAAAAGGTATAAAAACCTGATGGA
AAAAGGGAACTGTGGGATCCTGACTTTGGACGCTAGTCCGCAGGTTCCCC
GGGCCCTGAATAAAGCACCGCATAAACTAACTCTGTTAGTTTGTGTTCTT
TTTGGGGCATCGGGCAACAGTTTTCTGGCGACCCAGATGGGACTCCGGAG
GCGGCAGGGGCGGTTCGTGGGCTGATCCCCTCCACGCCGGCACCAGGTGA
TTTCTGGGGAGGACATCAACCCGTGCCCGACCCCGCGCCTGACGGACGAC
CAGGAGGTAAGCCCGAAAGGTGCTTTATTCCTTTTATCGAGGGAAAGGGG
GGGGGGCCTGCCGATTAAGTCGGAACGGCGTTTCCGCACAGTGGTCACAG
ACGTCTTTAAGGTTGTGGAAAAGCCTAGGCGCTGACCGTCAGACGCAGCA
GTGACTGCGCAGGTTCAGCACTTGCCACTCGCGGCGACGAGAAAGGCAAG
ATTTGTGGAAAGGGTGTGAGTGTTGTGTGTGGTGTGTATTAAAAAAAAAA
AAAAAAAAAAAAAAAAAAAAGAAAAAAAAAAGTGTAATGATGCCTTTATG
GAAATACAGGTGCTTTCCCGGGAAATTCACAAGGTGTCGCCCAGGCCTTT
ATGATGGGGAATTACCAGAATCAGAGCTGACTAGACCAGGATTTAAAGGT
AATAATGGAAGTAGATGGGGAACCGTTAGAATTTAGAGTAGATACAGGGG
CATCATTCTCAGCTGTCAACACTAAGATAGGACCTTTGAGTGATTCTACT
ATTCAAGTAGTGGGAGTTACGGGACAAGTTGAGGAACGAACATTTTTGCG
GCCATTAGATATAAAATTTGGGGGGAAGGAATTTGACCATCGATTTTTAT
ATATGCCAAATAGCCCAGAATCACTATGTGGGAGGGATTTATTGTCAATG
TTAGAAGCAAAGATAATATTTGAAAAAGGTAGAGTAAGATTAGAATTTCC
CGAGGAGAATATTGCTAAGCTGTTCGTAGTGAAAGAAGTAGAAGCAGTAG
AAATACCACAAGAAATAGAGCAAGCTGTAGTACCATGGGTATGGGAAACA
GGAGTACCTGGAAAATCAAAAGCGGCACAACCGGTTGTAATAGAACTAAA
AGAAGGAGCCTCCCCAGTAAGGGTAAAACAATATCCTTTGAAATTGGAAG
CACGAATAGGAATAGCACCCATGATTGAACAATTTCTTAGCTTAGGAATT
TTACAGGAATGTGAGTCAGAATTCAATACTCCGATATTCCCAGTTAGAAA
GCCAAATGGTAAGTATAGATTAGTTCAAGATTTAAGAGCAATTAATAATA
TCACTAAAGATATACACCCAGTAGTAGCTAATCCGTATACATTGTTGACA
GCTGTGTCGGAAAAATTTAAGTGGTTCACAGTGATTGATTTGAAAGATGC
ATTTTTCTGTATCCCCTTGGCACTTGAAAGTAGGAAATACTTTGCCTTTG
AGTGGGAGAACCCAGACACGGGACGCAAGAAGCAGCTCACCTGGACGCGT
CTACCACAAGGATTCAAAAACTCACCAACTATTTTTGGAAATCAATTGGC
TCGAGAGTTAGAAGAATGGAAGATGACTCAGGTAAAAGAATCACCTTGTT
TATATGTTCTCCTACAATATGTTGATGATATCTTTATAGCCTCCGCAGAA
AAGGATGTTTGCCTTAGACTCACCATTGAATTACTTAATATGCTGGGACA
AGCTGGATACCGAGTATCGAAAGAAAAAGCTCAGCTGGTAAGAACCCAAG
TGATTTACCTAGGCTGCGAAATTTCACAAGGGGTGCGAAAGTTAGGAATC
AATCGAGTACAAGCAATTTGCACCATACCCACACCACGAAATCCGCAAGA
GTTAAGATCCTTTTTGGGCATGATAGGGTGGTGCCGCTTGTGGATTCCGG
AATTTGGACTGAAAGCAAAACCCCTGTATGAAGCAGCCAAAGGCCCTGTG
TTTCAGTGGGGACAAATGCAAGAAAAGGCATTTCAGAGTTTGAAACAAGC
TTTAAAGGAAGCCCCAGCACTAGGATTGCCAGATCTCACAAAACCTTTTC
AACTATACGTAAATGAGAGACAGAGACTGGCAATAGGGGTTCTCACCCAA
AAATTGGGTTCATGGAAGCGCCCGGTGGGGTACTTCTCAAAGCAGCTAGA
CTCTGTAAGTGCCGGATGGCCCAGTTGTCTTAGGGCTGTGGCAGCAACAG
TGCTTCTAATTCGAGAAGCCAGAAAATTGACTTTGGGAAAAAGGATGGAA
GTATTTGTTCCCCATATGGTCATTGCAGTTTTGGAACAAAAAGGGGGGCA
TTGGCTCTCGTCGAGTCGCATGTTACAATATCAGGCACTCCTCCGAGAAC
AGGATGACATTGAATTAAAAATAACCAATCATCTCAATCCAGCAGAATTT
CTTAGGAGCAGCAGCCAGGAAGAAGGAGGCGAATTGACACATGATTGCGT
AGAAATCATTGAACAGGTGTATGCCAGCCGGAAAGACCTGAAAGATGAGC
CTTTGGAAAATCCGGAATGGGAACTGTTTACAGATGGATCCAGCTTTGTG
GAAAACGGAACCAGGTATGCGGGATACGCAGTAGTGACTTTGACACAAAT
AATAGAAGCTCGAGCTTTAACCCCGGGAACTTCAGCCCAGAAAGCCGAGA
TACAAGCTCTGGTAAGAGCCTTAGAACTGAGTGAGGGGAAAAGAGTAAAC
ATTTGGACTGATTCAAAATATGCCTTTGGAGTAATACATGTACATGGAGC
ACTGTGGAAAGAAAGAGGACTGTTGAATTCTCAAGGATCAGAAATTAAGC
ACAAAGAACAAATATTAGCACTATTGGAAGCAGTGCATAAACCTCAGGCA
GTAGCAGTGATGCATGTAAAAGGACATCAAAATGAAGAGGGAAAAGCGTT
CCAAGGAAACAAGCTGGCTGACAGAGTTGCCAAACAGGTTGCTCGAGAGG
TATGGACACAATTAGCTTTATTGCCAGTGCGAATTAACCCTGCCACTTCT
TTTCTTGAGCAGAAACCATGGTATACACAAGAAGATGAGAAGCTTGCTCA
ATTTGTTCAGGCCCAGAAGAACGAAAAAGGATGGTATGTCACTGCTGAAG
GTCAGGTTGTACTGCCAACAAAAGTAATGAAAACAATTTTAGAAATCGAA
CATAACAAGTGCCATTGGGGAGCAGACGCATTGGTACAATTTTTAAAACG
TAAGGTGATTTCCAATCAGATGTTAACAATGGCAAAACGGATTAACGCCA
TGTGTCCAGTCTGTATTAAAAATAACCCAGTGACACGAAGGCAAATACAA
CTAGGAAAGTTACAAGTGGGGCCGCAACCAGGAGACTATTGGCAAATAGA
TTTCTCAGAGCTACCAAAAGCACAAGGGTACCGTTATTTACTGGTGTATG
TGTGTACCTTTTCAGGGTGGCCAGAAGCCTTCCCATGCAGGACTAACCAG
GCAAAGGAAGTAATTAAAACTTTACTACGGGAAATCATCCCTAGATTTGG
AATCCCATTAGGGATGTCCTCAGATAGAGGACCTCACTTTGTAGCTAGAG
TAGTCCAAGAGGTAGCCAGAGTGTTAGGGATAGTTTGGAATCTCCATACG
CCCTGGAGACCACAATCTAGTGGCCAAGTAGAACGGATGAATCAGACATT
AAAAGGGCAGATTAAGAAAATTTGTCAGGAAGCGAAGATACAGTGGCCTC
AGGCACTACCTCTAGCCTTGCTAAGAATCAGGATTAAACCCAGAGAAAGG
ATAGGAGTAAGTCCATACGAAATTTTGTATGGCAAACCATATCATGCTAC
AACTTACAAAGGGGACCCTCACTTAGTAGGAGATCAAGCATTGTTGAGTT
ACATTTTGTCTTTAAATAAAGTCCTTACAGCGCTGCGAGGAGCACTGCAG
TGGAACCGGCCCCTGCCCTTGGAGAATCCTGTCCATGACATACAGCCAGG
AGATCAAGTATATGTGAAGAACTGGAATACGGAACCCTTGAAAGAAGTAT
GGGACGGTCCTCACCAGGTGATCATGACTACCTACACGGCAGTGAAAGTC
CAAGGGATCGAAAACTGGATTCACTACACTCGAATCAAGAAGGTCCCGTC
AAGATGGGAAGTACAGCCTCTGTCAGCAACAAAGCTGGTGTTCAGGGCAA
GGACTTAGTTCTTTTAACATTAGTCTGTATAATGCAGGTGGGAGAAGCAT
TTGTTAAAATTACAGTTCCGGAGCCAGATGTAATGGTGCCTGAAGGTGCG
GGAGTAAATTTAACCTGTCTGTTTTCTGACAACCAGAGAACTGGATTAAA
AGAAGTAAAGGTAACCTGGAAACAAATCACCACAGACGAAGTATTTACAG
AAGGAATCGTGACATTTTGGGATATGGAACAGCAAAGAGGTAACACCACA
TTGACAATGTCTCATATGCAAGCTGATCAGGTAGGACAATTCTCATGCAT
TGTGTGGATTAGAGAAAGCTTTGATTATGGGGACATAAATGTAGGTATTC
TAAAAGAGAATAAAACCCGAAGGGGGTACTCGGTGCGGGTAATACCGGTC
AGTGCACGGGTAGATATGTGGGATGGATTGAGAGATACAAGCTTGGCATT
ACAGAGAAACCAGGAACAACAAAACTTAGTAGTAGGGTTAATTCGAGATT
TTGGACAAATACAAAACGTATCAAAAATAACGGCATGTTTACCTCTGCCA
CAAGCTGCAGGGGAACCAATCCCTTGGGGAGTGATTCCAGTAGGAAATCT
ACCCCTAATAAAAAGAGGTGAGAATGGAAGTTGTGAATTAAAATTACGAA
ATAAAATCGAAATTGAAGAAATATGGGAAAAGGTTGGAGAAACATTAAGA
TTATTAACCTATAAGGACTGTCTAATTAGCCATGGGAGGTTAGGACAAAT
TAGGGATTGGGGAATTCAATTAGTGGCAGGGGGAAAAGTAAAACCTGAAG
ATGCTGCTAAGTGGGAATGTTTTATACCACATTGGCAAAAGAAAAGAATA
CCTAAAAATGAAAGCTATTATGAAATGATATGCCAGAACTCGTCCCGGCA
GGAATCCTCGTGGGACAGTTGGAAAACAGTATGGGGCCCCAGCATATTAG
AACATTATAGTTACATCGGACAAGTTAATTGGTGTGTCCAATGGACGGGA
AGCAGAAATGCCACTTACACAGAAGTATCTCAAACCAGCACTTCTACAAA
AACTTTGAGCGCCACAAAAGAAAATTGGAACTGCACCCAAATTCTCACCT
GTGACACTCCAGGGAATCAAATTAGTTGGGCACCGGTCAGAATGCTTATA
AAATGGGGTTGTGAGTGTAGAAAACTTAACCATACAATTCCAGGAAGAGC
TTTCCCGCAGGACCAGAAGGGTAAAACTTTGAGCTGTAAGGATACAACTA
TCAGGAGTCCAGGAAATTTAGTATGGATTACGGGACATGGACAATGGACA
ACACATTTACCGTTAGACGGGCCTGTAACACAAATTACCTTAGGGGTTCC
CACATTATGTCCTTTTTGGAAACAATCTAAATTAACGCAGAAAGAGATGC
AGTCACGAGCAAAGAGAGAAACAAATGAAGTAGCAGAAGAACTAGGACTG
GGAGATGAAGATGAATGGCATGAACCCTCATCAGGAGTTAAATTTGGATG
GGTACTGGAATCCTTGTTTGCACCAATTTCTACATATAGAAACCGGGAGA
TGCTGTACAAATTATTAGGACAAACTGAGAGGCTAGCCGCAGTTACAAAG
AAAGGATTTAAGGATCTAAATTTACAGTTGCAGGCAACGACAAGAATGAC
AATCCAAAATAGAATGGCATTAGATTTGCTTTTATTAAAAGAACATGGAG
TCTGTGGTTACCTCCAAGGAAAAGTTGATCATTGCTGCATACATATCCCA
AATGTCACAGAAGAAGTAGAAAAGGACATAAGTCAATTAGAACAAATTGA
AACAAAAGTGCATGAAGTCCAGGAGGAAGCTGAACATAATTGGGTAGGAG
CACTGTTTAGCTCCCTAGGAATCCAAGTCTCTGGTTGGATATCATCAATT
GTACAATATGTAATAATGATTGTATTGATTATTGTAGTATGCATGATTAT
GTATAGATGTCTTTTAGGAATGATTGCCAGAGAAGGAACTCATACTCGAC
GTGTTATGAGAGCACTGACCCGGAAAGAAGTAATCCTGCCAACTCGAAAG
GAAGACTCACCATCCTACATAGAAACCATAACTTGAAGAATTGAGCATCC
TTGCAGAAAATCTGAAGAATGCTCAAAAGGGGGGAGTTGATACCGAAATA
ATGAGAAAAAGGACTAATGTAGATATAGTAGTAGTCATGCTAAGGCTTAG
AAAACTGCAGTTTTCGGACAGGCCCTGGAAACCAACATTGTGAAACAATA
GTTAAAGAAATTAGTAGGGCGTATAGGACATGTAGAACTGTGAAAACAAT
AAGGAATCAGTAGGGCATATAGAACATTTAGAAACTTACAAGATAAGGCT
AAAGTATAATAATAAATAAAGGGTTCTGGTGATGAGAAAACATGCAAGGG
GGATTAAGGGGGGTAGCCTATAGTTCTGAGTAGACAAGCATACAGAATTT
ATAACTTTTAGGAATAATATCTACAAGATTTATGTATCTGTATTGTCTTG
AAGAATGTGTACTTTGGCAAGTAGACCATTTTGTAAAAAGGTATAAAAAC
CTGACGGAAAAAGGGAACTGTGGGATCCTGACTTTGGACGCTAGTCCGCA
GGTTCCCCGGGCCCTGAATAAAGCACCGCATAAACTAACTCTGTTAGTTT
GTGTTCTTTTTGGGGCATCGGGCAACAGGATTGCGAAGTGACAAGCTGTT
CTATAACTAAGGTAGTACCTCCCAAGTAGTGTGGTCTCTTCACCTGCTCC
AGGGACGAGAAGGGAAACACAGTTTTAGCTGTGCTTTTTGTGTAATTTTA
AGTGTGCCTCCCTGAGAGTGGTTTTAGTCCCTTCGTAAAAATGTCTGAAG
AAGATAAAAATACTTTTTATGCTTTGCTAGCTAAGTATAATGCCAGACCC
TCCCAAGGGGGAGAAGATTGGGCATACAATAACTGGTTTAATTTAGAAAA
TGTGATTGATAGGATACATTCTTTGCAACATGAAACAAAATTCAAACTGG
GCAGAAATAAGACCATTCTCTGCTCAGTTTTGGGGGCCTGTCTTACGGCA
GCTATAGAAACTCGCTTTACGCGAAGAAGTGAAGAAAGAGCAATTATTGA
CTCCCTACAAAATTTAGTGGAAATTTTGCAAAAACAACTAGATGAAGAAA
GGAATGACAATCATGCTTTGAGAGATGAGATTCATTCTTTAAGAGATGAG
AATCATTCTTTAAGAGCTGCCCTAAGACAAGAACACACCAACACTTTAAA
ACACACTGATTTGCCAAAAGAAACAGAAGAGAAAGCAACTAATCAAATAT
ATCCTCAAAAAGAACTGACTCTGATGAAAAATAGTGGGGAATATTGCTGC
CCTAGCTTGAGACTTTTGGTTAAAACAGAATACAGTTTCATCAATGATGA
GAATTTTGACCCACAAATAACCACTACAAAAATCCTGTACACTGCTACTA
AATTATCAGAAGAAGCAGCTAGTGGGTACTGGGGACATGGGACTTTCTTA
ACAACAGAAGTCAAACATAACTTATGGTCCCCAACTCAGCGTGCAGTTTA
TTGGGGAGCAGGGCTTAACCCTTCGGAAAGGGGAGACCTTGTAGCTTTAG
TTGGTACTCTCGACCAACTCCTAGAAAACATTCAAAAAGCTGCTTGCTTG
CAAATTATACATTAAATAAAACTCAATGCTGGATATAAATCACCGATGCA
ATTACCTGTAAATGTAAAACAATACCCTCCTCCTTCTGGTACCAAAGAAG
GGCTCAAACCGGTTATACAGGACTTGCAAAACTCCCCTGTATGGCCAATC
CAAAAACCCAAACCTGGCAATGGGGCTGTTTATCAATATATTGATGACAC
CNTCGTATGGGGGAANANATGNAGCAGAAGTAGTGGGGGATACTCAACAA
CAAATAATCTCCCATTTGGAAAGCCTAACTTGCAAATTGCCTCAGAGAAA
ATGCAAACACCTTCTCAGGAAGTGAAGTTTTTGAAGACAGCCACTACTGG
GACTGCCCCCCCTGATGGGGTGGCCCAGAAATTCTCAGTAACAGAAGGAA
CTGTAAAAAATCTGCCAATAACAGAAACTGAGAGCTTGGGTAGCAGCTAT
GACAAACCTGTCTTGGTAATTAAAATAGCCTCTGCCCTCTCCACCAAACA
ATCTTTGTTCACTAATTTTTTGTTCACTAATGTTGTTTCTGCTGAACAAA
TTATTGCTGGGGGACGGGGTGGCTCTTGGGTTGGGTTGCTGATGGTTATT
TGAAATGTTTTCCAGCTTGAAGCACGGAGTGCCTCCTTTGTCTGCAACTA
CACTGATTCTTATCCTGTGTTTAAAGGAGGTACAGAGTGGTTCCCTTTTT
AGCAGCAAATTATTGGGAAGTTAACAGAATTCCAATCTGCATTACATGCT
GAATAGTTCCATCATTTTAACCTCCTGCCTCTTTGTGGCAAATTCTGTTG
TGTTTACTTTTCACAGAATAATACCACGGAACATGAAGATTAATTGCTGA
ATCCCTCATCAAACCTGTATACGGTTACAGCACAGGACCTTACAGCTGTG
TTATATTTTGTGAAGATTCAAAATCAAAATTGAACTGTTGTACAATTTTC
CTCTGAAATTATGTGTGGTAAAAACAATATAAAATACTGAGGGGAACTTG
ATGTTAATGTTGTAACACTTGCTACCCAACCACCGGTTATACTGAGCCTG
AAAATCTTTAAAATTGGATCTTAGGTAATTTGGTAAACTAGCCAAAAACA
AATATTGTTTAAATCAGCATGGTCTTTTAAACAAGTCAAATTGCCAATGC
AAGACCAGGAGGATCCTTTCAAGAAACAAACAAGAGACATAACCGGTGTT
GTGGGAACAAGATTGGGAATTTTGAATAGTATTGATTTAGAAGTATTAAT
GATAAATTGCCTAACATTTCTTTAGCTCTCTGCTGTATCCAGGCTCAATT
GTGGATGCAGTCAGTTGCTGCCTCAATTATACAAGAAGTGGAAGAAACCA
CTTTTCCTACTGAAATTCGGAGAATAATTTGGAATAATGTTCATGATTTT
GAAAAAGAATTCCAATCCTAGTGAAATTACTACCCTAGCATAAGCACAGC
AACAGCCTTTGCACTGACCATATGTAATGCTTCAGTACATTCAATATTCT
CTCTCATTGCATTAAGGCTGAATCATGTCGGAGCTATTCTCTATCCTTTT
GAGCATAGAGAATGGGCCTGTCAAATTGCTGAAAAGTAACAAACTATTAA
TTTGGAAACTTACATTGTCTGGAAACAACAAGCGTTTATCTGTAAAAGTA
ATGCAATCAGAGCTCAAGATATTTGCTTAGACATAGATCAGAATGTCTGT
AACTTTGAAAGTTATCCAAAGGAGATTCCTGAAATGCTATTGGGGTGTAT
GAGCAATGGGTGTGCATGCTTAAGAACTGCTTGTGATTTAGTGTTTGTAG
AAAATGTAGCAATGGATTTTAAAAAAATCATTCAAATTTTCGTGTTTGTA
TGGTTGGTATTATTCGTTTTAGTAATGTTAAGTTTTTTGTTTGAAAATGG
TTTTAGAAAAACAATTGCTTTAATCAATTTTGTTAAACATGTTATAATCA
ATATTGATTTACTTTAATTTTAATTGTTTGGAAGTTATTTTATTGATTTG
TATTAATTTTGATTGTTCGAAAGTTTTCAAATAATATGATTGTAATTTGT
TTGAAAAATTGCTTTTCAATTTGTTGTGAAAATTGTTTTTCAATCAATTT
GTTGTGATTATTTTGATTTATTATCTTTGTGTCTATTTCTTTCCTTTTCC
TTTCCTCTTTCCCTCTCTCTCTCTGATCCCTGATTTTTCTGTTCCTGTTT
TCCGGGATATGCTACCAATGACGGGTCCTGAAGATGCTACATCGTCACAA
CATCACACTGCTGGAGTTCCTCAGCGACGCTCGTTTGTCACGGGGTGG
>oenMel1-14#LTR/ERVL	 
TGTCCTGGGTTGGTGTTTTGACTGACTCCTCACCCTGCCCCCCTTGGCCA
TGAAGCTGTCTGCTCCCGGGGGAGGGGCCGCCTGGGCTCGGCTCTGTGGA
CTGGCCTTGGTTTTTTTTTTTTTCTTTTTCTTCTTGCGGTGGCTCGCTTG
GCTCTGGCTGCTGCTGCTGCTGCTGCTGCTGGCTTTTCGCTGCTGTGGTA
GTAGTTCGTTGCCTGGTGCTCGCTTGGCTTGCTGGCTGTTTTTTCTTGCT
NCTTTTTCTGGCTTTNCGCTGCTGTGGTAGTNGTTCGTTGCCTAGCTCGC
TGTTGTTTAAGGCTTGCTGGCTGTTTTTTCTTTCCTTTTTCTCTCTCCCT
TTCTCTCTCTCCCCCTCTTGAGTGAAGTATTTTTTTCTTAAGTCTAGTGG
GATAAAGAATTGGGGGTTTATTCCCTGGGGAGCTCTTCTGGGGNTTTTTT
CCCCTAAGTTTGTCCAAACTAGGACA
>oenMel1-15#LINE/CR1	 
TGGATGCGGGAAAGGCTGTGGATGTTGTCTACCTGGACTTCAGCAAGGCC
TTTGACACCGTCTCCCACAGCATNCTCCTGGAAAAGCTGGCAGCCCATGG
CTTGGACAGGNGCACTCTTCGCTGGGTTAAGAACTGGCTGGATGGCCGGG
CCCAGAGAGTGGTGGTGAATGGNGCTGCATCCAGCTGGNGGCCGGTCACC
AGTGGTGTCCCCCAGGGTCAGTGCTGGGGCCAGTCCTGTTCAATATCTTT
ATCGATGACCTGGATGAGGGGATCGAGTGCACCCTCAGTAAGTTTGCAGA
CGACACCAAGCTGGGAGCGTGTGTTGATCTGCTGGAGGGTAGGAGGGCTC
TGCAGAGGGACCTGGACAGGCTGGATNGATGGGCNGAGNCCAACGGNATG
AGGTTCAACAAGGCCAAGTGCCGGGTCCTGCACTTGGGCGTGGCCAGCAG
GAGCAGGGAGGTGATTCTCCCCCTGTACTCGGCACTGGTGAGGCCACACC
TCGAGTGCTGTGTCCAGTTCTGGGCCCCTCAGTTCAGGAAGGACGTTGAG
A
>oenMel1-15#LTR/ERVL	 
TGCTGCTGCTTGCTGCCGCTTGCTGCTACCCCGGCCCCGCTGCTTTTGCC
CTATTGCTTCTGCCCCGCTGCTGCTGCTGCTGCCCCGGCTCTGCCCCGGC
TGCTGCTGCCTTCCCCTCCCCCCTTCTCTCCTTCAGCTCCAAGATCTGTA
CCGGCTCCGGACGGGACCTGAGCATCAGAGACTGCCTCCGGAGCCTGCCC
AAGAAGCTTCTCGCCCTTCCCAGCAGCGACCGTCTCTCACTTCGGTGAAA
ACAGTTCTTTTGTCATCTGGGATTGTACTTTCCTGTTGCTGGGAAGTGTT
TTTTCTTGTGTTTGTTAATAAACAAGTTTTTTCCACTTTTCCCCCCGAGT
AAAATTCTCTCCGAGCCCAGTGGGGGGGAGGAATTGTGAGGGGGGTTTAT
TCTGGGGGGCTCCTTTGGAGGCTTTCCCCCAGTTTTGTCCTAAACTTGGA
CA
>oenMel1-16#LTR/ERVK	 
AATGTGGTTAGCTAGAAGACCGCTCGGAAGATCACGCGGTGTACGAGGAG
TTAGGGCC
>oenMel1-17#LTR/ERVK	 
TAGTGGTGCCGAAACCCCGGGGTANCACACGGGCGCCGAACCCCGTCCGC
TCCCCGGCACACGGGTTCGAGCGGCGGGCGACGGGATTCGCGCTGGAGGA
GGCGAGACGGTCGGAGCAGCAGGTCTGACTCCGGCGGGGAGGACGCTCCC
GTACCGCCAGCATGGATTCGCTGCGCAAGGTAATTCTTGAGGTTTATAGA
CAGTGGGGAATCGAGTGCAAGCAAAAAGATTTCGAAAGCGCAATCATGCA
GTTATTGAAGTTAAAAGCGATTGATCGTCCCGTCGACATCCTGCACCCAG
GCTGTTGGGACGAGTGTACTAAGGCACTTGCAAACGATGTTATTACTTCA
GGCTCCAGCAAGTGTCTTAAGAGTTGGGGGAGGGTCACCCAGGCGCTCGA
AAAGGCTCTTATAGAGCAGGAAACGTGGAAGGCAGCCCGTACTTGTTTGA
AAATTATACCCAAATTGGGTGTGGGAGCTGCTACGCAGACCGCGTTCGGG
GATCGCGTCGAAGACCCGTGTCCGTCGGTCGAAACTAACCTCCGCCCGCG
ACCCCAGTCCCCTAATCTAACCACCGAACACGAAGCACGCCTAGATAGTG
ACGGAGCCTGTGGGTTTCAGGGCAACTTCGATTGCGCGAAACCTAATAAA
GTTTGGGAACGGCCGCCACCCTATGCACCACAAAATGGCGCCGGCCGAGA
GGGAGAGGGGCGGGACGCACAGCGCTTTCCCGCCACGGACACGCGCGGTT
GCGAGCGCGGGGAGGAGACCGCGGTTGGCAAGGGGGAGGAACCACCAATG
TCCGATCAGGGAGCGCGCCCCAAAACACGCCCACACACGGCGATAGGCTC
CCCTGAGGGGAGGCGGAGAAGGGAAAGGGAGGAACCCACCCGCGAGGCTG
TTAGGGGGCGGAGTCCAGTTAAAAGGTGCCACTGCCCGGAAAAACGCTGT
CAGTCGACTTCCTCCGAGTCGGACAGTGAACATGGGTGGATCCGGCGGCT
GCCGTGGGATGAGTGGTGGGGGAAACAAAAGAGCACAAAGCGGTATCCAT
CCTTCGAATCCGGTTCCGATTCTGATAGCAGCGGCACGTCGGCTGCACCC
ACCAAAATTACTAACCCGCTTGTCCCACGCACAAATAAAAAGGGCCTTTC
TAAGACCATGCCATTGACAGACTGGAGGGAGATTCAGTCTGCAGTTGCTG
ATTTACCCGAAGCAGCGGCACGAATATTCCCGGTCAAAAGAATTGATAAC
AATTTACCAACTTATTCTCCGGTGGATCCCAAAAATGTTCAGGCAGTTGT
TAAGGCCATTGCAGAAAAGGGCATTAATTCTGCTATGGTTTCCACTCTAA
TTGATGGCCTTTTTGGGAACGACGACATGCTCCCATTTGATATTAAACAA
ACGTGCCGAATGATTTTTGATGGAGCAGGGATGATTGTTTTCAAGCAAGA
GTGGGAGGACAATTTAGAAAAGATGCTTGCCCGAGTCACTGGAGACCAAC
ACCCCCTGCGTCACTCCAGCCTGCCACGGCTGATGGGCCGTGACCCGCAG
ATGGTTAGCCCCCAGGCCCAAGCCCAACACCTGCGAGCCTCCGAAATTGC
AGCTACGACCCGCGCAGCCAGAGAAGCCATTCGCACTGCCTGCCGAATTG
TAGCCAAGCCAGCCCCATGGACCACCATAAGGCAAAGTGAAAGCGAACGC
TTTACCGAGTTCGTGGACCGCCTCCAAGCAGCGGTAGATGCTTCTGACCT
ACCATCAGAAGCAAAAGGGCCAGTTCTCGAAGGATGCCTCCGACAGCAGT
GCAACCAAGCTACCAAGGAGCTTCTGCGCTCAGTGCCACCAGGTGCCAGC
CTCGCAGCAATGATCAAACATGTAGTGAGGGAGGAAAATCTAGCCCCGGT
CCAAGCTGCAGTCGGTGCTGCTTTAGCCCCACTCCCAGCTGCAGTCAGCG
CCGCCGTGGCTGAAGTCATGGCTGTTCAAAATTATCAGGGCCACAGTCAA
CCACCACCAACGGGCCCTCCGCGTTTAAGACAGAAAGGACCCTGCTGGGT
CTGCGGCAGAAAAGGTCATGTCGCCCGGGAGTGTCGCCAGAAGCAGGGAA
ACGGGCGAGGGAGGGGGCAGATGGGCCGCATGCAGCCTCCTCCCAGATGG
GACATCCGGCGGCCCAACTACGTGAACCCCGTGGAAGCAGAACACCTTCC
GAACCCGCTGCCCCCCAGGGAGGTAACCAACTTCACGGCTCAACCAATAC
CCGACTCCGTGGCTCAGGCAATGCTCCAACAAAGATCAACTATGCAGAGT
ACCACAACACCTCAAACACCGAACACCTCGGCGAATGGTCAGGCAGTAGT
CCCTGGGTGGCCTTGGCCATAAAGTGTGACATGTTCAATCCAGGAATAGT
GTGGGGAGTTTGCCGGCTGTCCCGTCGACCAGACAATGATCTCATCGCCG
TCCCATTCATAATAGACACCGGAGCGGATGTTACTGTGATTCCCAAGACT
AATTGGCCTCCAAGTTGGGAACTGGAAGAAGCTCCAACAGTAGGTGGAAT
CGGGGGAGTCTCAACTGCCCAAAAAAGCGTGGAATTGATAGCGATAACCA
TCCATACTAAAAACGGTGTAGAAAAGACCATCAACCTTCACGTGTATGTC
CTCTCAAATGCCCCACCGTTGCTGGGACGAGATGCTCTGGCTTTATTAGG
TTGCAGGGTGACAAATTTACCCTAAGGGCCACTGCAGCGTATCCGACAAT
TCCCATCCCACTGATATGGAAGTCATCAGACCCCGTGTACGTTGAGCAGT
GGCCCATCCCAGAGCCTCGATTGTCTGTCCTTCTCAAACTGGTCCAACGA
GAATTGGAAAAGGGACATATCGAACCATCTGTTTCTCCCTGGAACACGCC
TGTGTTTGTTATACCCAAGCGCAGTGGTGAAGGCTTCCGCTTGCTCCATG
ACTTACGGGCAGTCAACAAGAAAATTCAACCAATGGGACCCGTACAAACA
AGACTACCAGGCAACTCCTTTGTTCCAACAGACCAGCCCTGTGCGGTAAT
TGATATTAAAGACTGCTTTTTTTCCATTCCTTTACATGAGCAAGACAAGG
AGCGATTTGCATTTTCCATCGTGTTCCCCAACGGCCAACAACCGAACCTC
CGATTTCAATGGAAAGTTCTTCCCCAGGGAATGATAAACTCACCCACCAT
CTGCCAAATTGTGGTAAGCCGAGCCTTAGCCCCAGTTCGATCTGCAAATC
CTCAAGCCACCATAATTCAATATATGGATGACATCTTGATAGCCGCTCCT
TCACCTAGTCAAGTGGACAGCCTTGTAACGGCAATATCCGAAGTCCTAAA
AGCCAACGGCTTTGAGATAGCCGAAGCAAAGATAAAGAAGGGTTCATCTG
TCACATTTCTGGGCGTAAAAATCAACGATTCCTACGTGTCACCACCTATG
ATCAAAATCCGCCGTGATATCAAAACACTGCATGACGCACAACGGCTGGT
GGGATCGTTACAATGGCTTCGCAATACCGTCCTCATTCCCCCCGAGGTGA
TGTCTCCGCTGTACGATCTCCTTAAAGGCAAACACCCGTGGGAGCAGAAA
AATGTTTCAGAAGAAGCCGCCCATTCACTTGACTACATCGAGCAACAGCT
GTCCACCGCTGTCCTTTCTAGGTGGAACCCGAGCCTCTCTCTGGACTTCT
ATGCGCATTTTACAAAAGAAGGGGGAGTCGGAGTGTTGGCACAAGGACCT
CCTGACTCAGCTAAACCGGTACAATGGGTAGTCCTGGGAAGACTATCACG
AGCTTTTACCCCAGGAGTGGAATGTCTTGGAGACCTGATTATGAAGGGCA
GGAAACTTGCACTGAGTCACTTGGGTCTCGAACCAGCGAGAATATACCTA
CCCTTTCGGAAACAGATCCCGTCATCATCTGTAGCAATCTCAGAGTGCCT
CGCCTTGGCTCTGTTTGGTTTCCCGGGAGAACTCTGTTATGCAGTCAAAC
CTCCGTGGACTCAACTGCTGGCCATTGTGGACATTGACCTCCCTCCGAAG
GTCAAAGAACGACCCCTACCAGGTCCAACCGTGTTTACAGACGCGTCTTC
AACAACTTCCACCGCAGTCGTAGTGTGGCAGGAGCAAAACCAGTGGCAAT
GTGTTAAAAAGCAAGACAAATCTCTATCAGTCCAGCTGCTTGAAGCTTCA
GCAGTAGTGTTGGCATGCAGTTTGTTCCAGACCGAACACCTCAACATCGT
TACGGACTCTATGTTCGTTGCAAAGCTCTGCCAAGCAATGGCTAATCCAG
GTGTCTCCACCTCACCCGCGGCCATCATGATTGAAGAAGCGCTCTACTCT
CGACAAGGCACGGTGTCAGTCGTCCATGTTAACAGCCACGACCCAGTCAA
AGGGTTCTTCCAGATAGGTAATGACAAGGCTGACACAGCAGCGAAGGGCC
TTTGGACTCTCCAGGAAGCACGCCAACTGCACGAATCGCTCCACGTAGGA
GCGAAAGCACTCGCCAAACGATGCAACATCCCCATGTCAGATGCCAAGCA
CATAGTCGCCACCTGCCCATACTGTCAAAAGTCACCTTTGTGGTCCAGCG
GCGTCAATCCTAGAGGCCTGAGGGCCTCGGAAATTTGGCAAACAGATTTT
ACCCTGTGCCAGCTGTTGAAGCCAAGAGCGTGGCTCGCTGTGACCGTGGA
CACGTATAGTGGCATGATCGTTGCGACTCAACACGCTAAAGCTAACTCCA
AAGCCACCATCCAACACTGGCTGACAGCCATGGCTTGGCTTGGTATCCCA
AAGCAAATCAAAACTGACAACGGAACAAACTTTATCTCTAAATCAGTGCA
GGAATTTGTTACCAAATGGGGCATCACCCTAAGGCAAGGTATTCCCTATA
ACAGTACAGGACAGGCTATAGTAGAGAGGGCCAACCAAACCTTGAAATCC
AAGCTAGAGACCTTAGCCAAAGCAGAAGGATTTTCCAATGCCATCCCTCC
ATCAGAGCAGCCACGTTTGTTAGCCACTGCCATGCTTGCATTGAACCAGT
TTCCCAGAGGGAACCATAGTCAGGCCCCTTCTCAAAAGCATTGGGCCGCA
GAAATCACCAGGGAAGGCCCACCAGTGAGCGTTAAAAACGAGCTGGGAGA
ATGGGAAACGGGTTGGAAGCTAGTTGTTACAGGCAGAGGGTACGCAGCGG
TAAAAAGGGATGATGTCATTAAGTGGTGTCCTCTAAAGTCCATAAAGCCC
GTGCTGCCTAACAAAACTGACCAAACCTCTGAGCTTCTTTTAACAGGTCT
GCCACTATAAACTGCTTTTTCAGCCTCGAGCTTTGTTATAAAAACAAGTT
GTGGTTGCACCTAAATGTTTAAAATAGTTCAGGCCTTGTTACTAACGCGT
TCTACAAGTTGATACTAACACAAGTTTAATACAGTTGTAAAGTTTAATTG
TTCATGGAGAGGGGGGAA
>oenMel1-19#LTR/ERV	 
ATTTGGGGGCTCGTGTCCGGGATATTTCCACCGTCCAGGGCGGCAGGCAG
CGGGTGGAGCTGAAGGCGCGCCTCACCCAGTTTGGTGATCAGCTCCCCTG
GGTGCCGGCTGGCCCCGGGCGATCGATTGGGTTCCCGAGACTGTCCAGGA
GACAGACGAGTGGCGGACCAGGGGTCCGTGAAGAGTCCGCAGGGAAGGAC
CAGTGAAAATCTCACCGGTGAGTAAAATGGGATCCTCGGGGAGCAAACCT
GGGAGGGCGCCCACGGAGGGCAGCACAGGTACACCTGGGAGGGCGCCCAT
GGAGGGCAGCACAGGTGAAACGGGGAACCCATGGAGGGCAGCACAGGTAC
ACCTGGGAGGGCGCCCATGGAGGGTTGGTTGCACAGGTGAAACAGGACAC
CCATGGAGGGTTGGAAGGGTGAAGCCGGGAAAGGGCCCCCGGAGAGTCCC
TTGGGGAAAGTGCTGGGGTCTTGGGACAGATTGTATATTCACTCAGAGGT
AACTATGAAAATTATGGTAAAATATTGTTATTTTGTGTGGCCAGAGTATA
AGTTGTCAAAGGGGCTTATTAAGGCCATGTTATATAGATGCCCTGGGGGG
GCAATAAGGGAAATCGAGAAGGGGACTCGATAGTCCATGGCCTGAGGGGC
AAAAACGGGAGTCGAGAGAGGGTCTCGACAGCGGCGGGTGGATGGAGAGT
GTTTGTGCGTTAGAACAGAATTGAAGAGGAGTGTGTGATAGATATGGGTG
AGGCAATGAGCGGCAGGGCCGGGCACGGAGCTGCGGGACCGAGAACACGG
GCTGGGGGCTGTGGGTCTGCCGGTGCTCTGTGCCGGGCTGTGCCTGACAC
CGACACCCCCGGGCAGGGCCGGCAGTGTCCGCTGGCCCCCGTGAGGCTGC
GGGATGCCCAGCCGCCCGTGAGGCTGCGGGACGTGCTCGCTGGGAGCACC
GGTGGGGGAGAAGTGTTTGGACTGTGACAGGACAGGCACAGGTTCTGGTA
TACGGTGTGTGATAAAGAAAAGGAGAACAAAAAATAAAGGAATATTTGGG
AAATGCGGATTATACATGGAAGGATTGGAATTTTCTTTTGGGAGTTTTGT
TTGGGTCATCGGAGAGACGAATGGTTTTGCGGGGGGCTCGGCAGCTGTGA
GGGGATGGGCGTCCGCGGGCAGCGGGGGGGCTGTACCCAATGCACCTACG
GTGGATGGTGCCGTCCCCCAGGCGGACCCCCAGTGGGACCCAAATAACCA
GGCTAGTTTGGCTCGCCTCCGTGATTACCGTGCTTATCTGATCAGGGCAA
TCAAGTCAGCGGCTCCCAAAGCTAACAACGTAGCTAAGGCTATGTCGTTA
GAACAGGAGAAACAGAAAAGTCCCTCTCATTGGTTGGAGAGGATTACGGA
TGCCTTGAGGAAACATGGGGGGATGGATCCTGAGGGGCCAGCCTTTGACA
CATTGCTGAAAGTGCAATTTGTTACTAAGGCTTGGCCTAATATAAGAAAA
GGAGTACAAAAAGATGAAAAGTGGCAAAATAAGCCTCTGGAAGAATTGGT
TAGAAAAGCACAGCAGATATATGTGAGAAGGGATGAGGAAAAGGCAAAGG
CTAAGGCAAAGATGATGGCAGAGTTTTTGCAGCCCCGGAGGAATAAACCG
CAGGGTCCAAGGGGTCCCCCGGGACAGAGGGGACGGGGTTGGCCACAGGG
AAGTGGCAGAGGCATCCCCTCTTCGGCAGGGGAAAGCCAACCCAAACCGC
GGCTGGGGAGGAACCAGTGTGCTATCTGCAGGGCAGAAGGGCATTGGAAA
AATGAGTGTCCGCAGAAACAGCTGGACCCTCAGGAAGAGGAAGTCCAGAG
GATAATGGAAATGGATTGTTAGGGGTGTCAGGGGCTCCTATTATATCAAG
GACCCACTACTCAGGAGCCCTTGATAACTTTTAAGGTGGGTCCAGATCGA
GAGGAGGTGTGTTTTTTAGTAGACACAGGGGCCTCCCAATCCACCTTAAA
TTTTATACCTAGGGGGGGAAAATTGTCAAAAAGATCTGTGGTTATTCAAG
GAGTGAGTGGAAAGGATGAGGGAGTGTATTTTATTCAACCACTGTTAATC
GATGTGGGGGACAGGTTTAAACTGCTTAATTTCCTTGCAAAAAAGGGACT
TAGAGTGTCCAAAAAGAAAGCTCAGTTAGTAGAAAAAAAAAAAAGGTCAA
ATATTTGGGACACATTCTGACTGAGGGGTTACAGTGTATTGATCCAGAAA
GAATAAAAGGGATTTTGCAAATACCATTTCCCCAGGCTGAAAAGGAGCTA
CGGCAATTTTGGGGTTGGTAGGGTACTGCAGAGCTTGGATCGAGGATTTT
TCTGTTGTGGCTAGACCTTTGTGTAACTTTTTAACCCAGAGCGGTCCTGG
TGTTGTGATGTGGACACCAGAGGTGGAGCAGTGCTTTGGAAAATTAAGGG
ATAGATTGGTTAGTGCCTCGGTCTTAGCTCTTCCGGACACAGAAAGGGAA
TTTCAACTACATGTGGGTGTTGAGCTGGGTCATGCTAGAGGAATTTTGGT
GTAAAAGAATGAGGGACAGGAGGCCTGTCGCCTGTTTTTCTACATTGTTA
GACCCAGTGGGCAGAGGCTGGCCCCGTTGTCTGCAGAACTGTGCAGCCAC
AGCTCTGATGGTGGCTGAGGCAAGAAAGCTTACAAGGGGAGGGTATCTGA
TCGTAAAGGTTTCACATCAGATTAAAGCTTTGTTAACTGAGAGAGCCTCT
AAGTGGATGACGAGCGCTCGATTATTACAGTATGAATCTTATTTAATGGA
ACAGGAAGATTTAGAATTTAAAAATGGGGAAAATTTTAATCCAGCCTCCT
GTTTAAATGGCCAAGGGGGAGACAGGAGAAAAGCCATGATTGTATCCAGG
TTATAGATCTTCAAACTAGAGCTAGGAAAGATTTGAGAGATACTCCCTGG
CCTGAGGGAGAGAATGTGTTCATTGATGGGTCGTCAAGAGTGATAAACTA
GAAGCGTTTTACAGGATACTCTATCGTGAATGGGAAACAATTAAAGAAAG
GGGGGAGGTTACCCCCACCTGGTCAGCCCAGACAGCTGAGCTGTATGCGC
TGATCAGAGCCTGTGAGTTATACCGGGATAAGACAGTGAATGTTTTTACT
GATTCTAAATATGCATATGGGGTGATACATGCATTTGGGAAACTGTGGGA
AGAACGAGGTTTATTAAATTGTAGGGGGAAAGATGTTAGCCCATGAGAAC
TTAGTCTCTCACCTATTAGAGGTGGTGAATTTACCAAAAAGGGTGGCAAT
AATCCACATTAAGGGGCATCAGGCAGGGTACTCAGAGGAGGCAATAGAAA
ACCGACTGGCGGATAAAGAAGCTCGGAAAGCTGCATTGTTGCAAAAAATC
TCTTAAGATCCTCCCCTTACTCCCAGTAACTGCACCGCTGCCGGAGAAAC
TGTCTTTCCCACCAGAGGAACTTAAGATAATTTAAAAAGTGGGGCAGAAG
AAAGAGCAAATAATTGGTTTACAAGGGATGGGAGGCAGTGGATCCCAAAA
GCTCTGGCCTTACAATTGTTAAAACAACTTCATGGAGTCATTGGGGCTCT
CGAGGGCTGGCAGAAGTCTTCCTAAAAATGTATGCTGCTGTGGGTCTCTT
TAGCTTGGCAAAACGGGCTATTGAGGGTTGTTTGACTTGTGCTAGAACCA
ATAACAAAATTACAAAGAAACTTGCCAGGGGAGGGAGGCCTTGGGCTGTA
CGTCCCTTCCAGAGATGTCAGGTGGATTTTACTGAGATGCCCCGAGTGGC
AAGGTTTAAATATCTTCTGGTAATAGTATGTCAATTAACAGGGTGGCCAG
AAGCATTCCCTACTGTTTCAGCAACTACAGGATCAGTTGTTAAAGTATTT
TTGGAACAAATAATTCCAAGATATGGAATTGTGGAAGCAATAGACTCAGG
GGAACTCATTTTACAGAAAAAAAAATTCTTCAAGGAGTTATGGCTGCTTT
AGGGATACAATGGAACCTGCATACCCCCTGGCACCCCCAGAGTTCGGGTC
GGGTTAAAAGAATGAATGGAAAAATAAACACCTTCTGAAGCTGGTGATAA
AAACCAAGATGCCGTGGGTACGGCTCCTGCCCCTGGCTTTGGCAAGAATA
AGGGCCAGACCCAGGAAAGATATTCAATTATCTCCCTTTGAATTAATGTT
TAGAATTCCTTACCCTTGCAATTCTCAGCCTAGTGGGGGGGGGGTAGAGA
TAAGTAATGTGTATTTGAGACATTGTGTGGCTCGGATGCTGTCTGTTGTG
AAATCTCTTCGACAGGAGGCTCAGCTGGCACAGACCCTGCCTTTGGACTT
TGCTGTTCACAACATCCAGCCAGGAGATNGGATCCTAGTTAAGGAGTGGA
AAGAAGCACCGCTGGTGGTGAAGTGGCGTGGACCGTTCCAGGTGTTGCTG
ACCACAGAAACAGCCGTCAAGACAGCTGAACACGGGTGGACCCATCACAC
TCGGGTCAAGGTCCCTGAGGCCCCAGAGATTTGGACATCTCAGCTGGAGG
AGAGGGACGGGAAGCCGCGACTGACACTCCGCAGGGGCGGACTGGAGCAG
TAGCAAGTGCGTCGACATCGAGGGAAGCCTCGTGTGCCCACCCACGGACT
GCCTGCTGAAAGTCTGTGTGGGCATCCCTCCTCTCGGATCTCCAGTCTGG
CTGGGGGGCCAGCCCTTTGCTGTCACTGTTTTCTTTGTGCTGGGCTGTTT
CTGTGCCTTCACTCACCACAGGTGCAGAAGACAACGTGAAAGTAAAAATT
AGGTTGGGGAATTACATAACACCATCAGAATGTTTCTCTTAATAATCTTA
CCTTTATACTGTCAGTTAGGGTGGGGCCAGGAATGAGAAAATAAGTTTTT
NACTTTAGGAGAAGAAGTAGCAAAAAAACCTTTAACCTTAGCAATTGCTG
GGTCTGTGGGGGGCCAGGAGGATCTGAAAACTGGCCNTGGGTGGCCAGCC
CAGTCGAACCTAAATGGTGGGTTAGCACCCTGAGTGAGGTCCATAATGGA
ACAGAATTTTGGGATAAAAAAAAAAAGAATTCCATGGCGGCTTCATTCTT
CTGAAAGAGGCACTTATTGTCTAAATAGAACAGGAAGCATATCCGTGGGA
AAAAGTGTTTGTGACTGGACTTTATCAGTGGAACTGGCAACACTGGAATG
GAACTCGAACTCTTTTTATCAGGTTCTGGTCCAAATATAATAAGACAGAT
CTGGGATGTAACTGCAGCTGGAAACCTCATGTGGGAGCATGGAAGTGCAA
ATACTGTGATTCCTATGGTGGGGCAAACAATTGCTTTTTTTCTCTTATGT
GCTGTAGCAACTCTAGTATTTTTACCATGCATGATCCCTTGCTTAATACA
ACTTACTCAACATGTGATCAAGGGAATGCATGTTATAGCCATGCCTACTG
ACCCACAGATGGCTACGAAAGGACAGAAATTGATGTCATTGCAAATAATT
GCAAAACCAAAAAAGACACAAGAACAAGAAATTAAGACAATGATAGCTAA
AGTTTGTAAAGACAATTACTAAAAATAAAAGAGGAGGGAT
>oenMel1-1#LINE/CR1	 
CCTGTATCAGNAATAGTGTGGCCAGCAGGACCAGGGAGGTGNTCTCCNCC
TGAAAGGAGGNTGTAGCCAGGTGGGGGTCGGTCTCTTCTCCCAGGCAACA
AGCGACAGGACAAGAGGAAACGGCCTCAAGCTGCGCCAGGGGAGGTTTAG
GTTGGATATTAGGAAAAANTTCTTCACGGAAAGGGTGGTCAAGCATTGGA
ACGGGCTGCCCAGGGAAGTGGTGGAGTCACCATCCCTGGAGGTGTTTAAA
GACTGGATGTGGCACTCGGGGNCATGGTTTAGTGGTGTCGG
>oenMel1-1#LTR/ERVK	 
TGTTGTAATTCGGTATTTGAGGTATAAGAAATTATATCAAGGTATCCTGT
AACCTCCTTCCTGCAAACCCCAGTTCCTGTCTTCCTTTCCGGTCCTGTG
>oenMel1-20#LTR/ERVL	 
TGTGATAAAAGGTCTTAGCTAAAAAGTTGCTAAAAGTGTTAAAAAGATTG
TTGTTGCTTACCTTATCATTTTATCCACTCGTTCGTTTGTTGGTTCTTTG
ATCAAGTTGCTATGTTCTTTTCCCCAGTTAAATGTGTAGTCCTTATGTAA
TTTAAACCCCAGTTTGCTGTATTTCCCTATCCCAGTTATCTCCCACTTCC
GCCCTTTCCCCTACCCACTTCCGCCCTCTTCCTTAGCTTGTTTCCGGCCT
GCTGCCTGCCTGTCAAGTCAGCAACACCTCCATATGTAAATCTCCAGTAG
TTTCCCAGTACCACCAACACCGGAAGTTGTTGCTAAATAGAAAATACACG
AAAGTAGCCAACCAACACCGAACCCAAGTCCACAGATCATCTCAACTAAT
AAGCTGGGTCACCTGCAATGTGGCCTTTGTGACTGTTGAATCACCACAAT
CTTAGGAGCAGCTGAAAAGAGTAACTTCCCCCAGACCAACGNGCCACTTT
ATTACA
>oenMel1-21#LTR/ERV1	 
ATTTGGGGGCTCGTCCGGGATAGGCCACACCCAGAAGAGGACGTCTGAGG
GGAAGGCGCCACCCCGAAGAGGCCCTCTGGGTCAGCTGGCTACCCCGGTC
CTGGAGCAGTGCGGGACTAGGATAATGCCAGGAGCGCTGGTAAGGAGACC
GGTGGCGGGCACGGGAGGCGAGTGAGTGTCATGGGAGTGAGACGGGGGCT
GGTAGTCCAGACTCCCGAAGCGAGTGTGGGCCCCTGAGTACCGCGGTTCC
GGACTCCCGCGAGGGGGCCGGCCGGGAAAAGGTGGAAGCAACTGAGGCCT
ACCAAGGCCTGGAGTGTGAAAGAGGCGCCTCCTGGGGTAGTAGAAGAGGA
GTAATAAAAAGGGGGGGGTGCAGGGAGGGGCAGCCGGCGCCCCGCTAGGA
CCGAGCCCCCCAGGGATGAGGGTTTAGGAAGGGGTATCCGGGCCCCGCTG
GGACCTAACCCAACTCCCACTAACAACTGGGAAGAGTAGAGGGAGGGGCT
AACCGGGGCCCCAGTAGAGACCGGCTCTATCCCAGTACAAGGTCTGGGTG
CCTCCGAGCGTGCAGAGCCCTAGACAGGTGTGAGTGACAGGTGTGAGTGA
TAACTGGGAAGAGTAGAGGGAGGGGGTAATCAGGGCCCCGCTAGAGACCG
GCTCTATCCCAGTTCAAGGTCTGGGTGCCTCCAAGTGTGCGGAGCCCTAG
ACAGGTGTGAGTGACAGGTGTGAGTGATAAGTGGGAATTGTAGAGGGAGG
GGGTAATCAGGGCCCCGCTAGAGACCAGCTCTATCCCAGTTCAAGGTCTG
GGTGCCTCCAGGTGTGCGGAGGCCTAAAGAGGTGTGAGTGGCACGCAAAG
TCCAGGTGGCTCCAGGTGTGCGGAGGCCTGCACAGGTGTGAGTGGCACGC
GTAAGGGGGATATAGGGAGGGGCAGCCAGGGCTCCGTTAAGACCTAACCC
TAAATAGGGGTTATAATAGGAAAGAGGTGAACCCCAATAGCGACTGCCTC
TTTCCTGCGCCAGAGTTTTCGTTGCCTGTCATTAAAGTTTCCTTTTGAGT
AGAGGCACCTTATATTCAGTTAAAAAATTTTACACCATAAGTTAAAAAGG
GCCAGACTTTTGTTAATGAAACGTTGTGTTTTTGTTGCCTGTCAGTTTTT
ATCTGTTCGGGTAGAGGCACGGTTGAGCTTTTTGTTAGGCCCAAATAATT
GAGTGTACCAGTAAGTGTGAGCGAACAGTAAAGAGTGGGTCTAGCAGTCT
TGCGTGTAAGAAAGTCTACTGTTTTAGTAATTCCCTGTCTGTGTAAAAGA
AAGCAGAGTGTAAGTGTACCAGTAAGAGTAAGTAAGCAAACAGTAAAGAG
TGGGTGTAGCAGTTGTGTGTGTAAGTGAAGTTAGTGTTTTATTAATCAAT
ATGGGAGCTTGCATAAGCCAAAAGAGTAGAGCAAAAGAGCACAAGTATGT
AAAGAACATCCCTCCCGATAGCCCTTTAGCAATGATGTTAAATGAATGGG
ATACTTGTGAAGCTACTAAAAACTTAGATAAAATAAAAATGATCCACTAT
TGTGTTGAAGTATGGCCAAAGTTAGATCTACCGGGAACATGGCCATGGTT
TGGCACCCAGGATCCATGGATGTGTTCGATGCTAAATCAGTATTTAAGAA
CTTGGGGAGGATCAAATATAGAACAAATAGAATACGCAGCCTGTTGGAAA
GGAAGTATAGGCAGAGAAGAACCAGTAAAGATATGTAAACTAGCAGACAA
AGAAAGACAGAAAAATAAAGAAGAGAAAAAGGAAAATAAATGGGACCCCC
TTGATCATCTTCCTCCTCCTCCCCTGCCTGTCAACGTCCTTGATCACCCA
CTTCCTCCTCCTCCGCCCAATACTTCCTTTGAATCACCTACTTCTCTGCC
CACCAATGCCCCCAATTACCTTCCTTCTTCTGCTCCATCTGTCAATCCTC
CTCCTACCTCTTCTCTGCCCACCAACGCCCCCAACTACCTTCCTTCTTTT
GCTCCGCTAGTCAATCATCCTCCTTCCTCTGTTACGCTCATTGAAAACCA
TCTCTCTCCTTCTTCCACCAATGCCCAAGGTCCTCATCTTCTGCCCCTGA
CTGACCACAACTCCCAACCCTCGCTTCTAAGTCCATCTCCTCAAGCATTT
CCAGTTTCTTTTCCTCCTCAACCATCTAGTATAGCCCTTCCATCACCACC
TTCCCTTAGTACCCCTATTCCAAACCAGCCTCTTCTTCTTATGTCCCCAC
TTACTAACTTGCCTTCACCCCTAGTATCCTCACAAAACCCAATTCCTCCT
GCCTTGGTTCAGGCCCCTCCACCAGTAGCCGTTCCTTCACCTCCGCCCAA
TTGGGAACTGAGTCTATCTCCGTCCAGCAGTAGCGCTTCCTCCAGTAGCC
TACAGAAGCCTACACCAGCACAAGATAATAAGTTTGCAGAGGGACCATAT
TATAATACAAGGTTAAGGGCAGTAAAAGCAGAGAGGATGTTCCCACTTAG
GGAAGTTCCTATGGGAGGAATAGAGGGTGGACTTGGATTTGTAGACGCAC
CATTGACGGCATCAGAAGTGAGAGGATCTAAAAAAAAAATCGGAAATTTA
GTGGAAGATCCCGTAGGTATTGCAAACCAGGTAGATCAGTTCTTAGGACC
CAGTATTTATACGTGGAAAGAAATGAATTCAGTTATAAATATACTATTCA
ACCCAGAGGAAGTTAGAATGATCAGGGAAGCCGGTCTACGCATATGGGAG
AGGGAAAACCGGCAAGGACCACCAGGTGACTATAAACTACCTCTCGTAGA
CCCCGGATGGAATCCAAACCAAGAGGAGGAGAGGCGGAATATGATGGACT
ATCAAGCCTTAATAATTAGGGGAATAAGAGAATCAGTTCCTCGCCAAAGT
AACACCAAGTTGGCCTTTGGAGCAGTACAAGAAAAAGATGAGACCCCATC
CGCATGGTTAAATCGTTTAAGGAAAAATTTTCAGCTGTACTCCAGTATAG
ATCCTGATAGTCCAGACGGCCAAGCAGTATTAAGAGTACATTTTGTCACC
AAATCTTGGCCTGACATCCGAAGAAAATTGGAAAAGATGGAGGACTGGCA
GGAGAAAGGAATAAATGAACTACTTAAAGAGGCTCTAAGAGTGTATCTGA
GGAGAGAAGAGGAGAAAGCAAAATCGAAAGCACGAGTAATGGTAGCTGTG
GCCCAGGAAGTTATGAATGTAAATGGAAATAAGCCAGAAAAGCCATGCGA
ATCTGGACAAGAAGGACCTAAGATAGCACTAGACACAGGAGGTCCTAATG
CCAACCCCTTGCAGAAGCCCAAGAAGTTTCAGGGCAGATGCTATTACTGT
GGAGAAGTAGGTCACCCCAAGAAGTACTGCAAAAAAATTACCCTTGATGA
AGCAATAGAAAGGGAACAGGAAAGTTTGGAGAAGATCTTAAGAGGGGAGG
ATTAGGGGTGTCAGGGGCTCTATCCTTTAGGGGACCCAATGAAACATCTA
AATGAGCCCTTGATAAACCTCAATGTTGGTCCCCAAAATTTAAGTTTTGA
ATTTTTAGTTGATACAGGAGCTGACAGGTCTAGTTTGAAAGATCTTCCAG
CAGAAGTCCATATTAGTAATCGGACGTGTGAAGTAATAGGAGCCGAAGGG
ACACCCTTCAAAGCACCAATAATTGAAGGAGTAGAATTGAAAGGAAACTT
CAAACAGTGTGTGGCAGAGATGATTTATTTACCACATTTAGAAAAGAACT
TATTAGGGAGAGACTTACAAGTTGAGTTAGGAATAGCAATTATCCCAGAG
AATGGAAAGATGGTTGTACGGATTATGAAATTAACTGAAACAGATTTGAG
TGAGATCACTCCCCAAGTATGGGCAGAGGAAGGAAAAACTGGCTTTTTAG
ACATCACGCCAATAAAAGTAAAAATGCGAGAAGGAACCACCCCAGTCAAG
GTAAAACAATACCCAATATCCGAGAAGGGAAAAGAAGGACTAGCTCCAAT
TATAGACCACCTTCTGGCAGAAGGTGTGTTAGAACCATGTATGTCCCCCC
CATAACACCCCAATTCTAGCAGTCAAAAAGGCAGAGGGAAAATCTTGGAC
AGATTGGTCCAAGATCTAAGAGAAATTAATAAAAGAATCATTGTTAGACA
CCCTGTGGTGTCTAACCCTTACACCCTGTTGAGTAAAATTCCCAGGGAAC
ATGCATGGTTCACTACCATAGATTTAAAAGATGCCTTTTGGGCGTGTCCG
CTAGCACAAGAATGCCGTGACTGGTTTGCATTCGAGTGGGAGTACCCAGG
AGGGGAGAGAAAACAACAATTAAGGTGGACTCGTCTGCCTCAAGGATTTA
CTGAGTCCCTCAGTCTTTTGGGACAGGCTCTAGAAGAACTATTAGAACAG
TTCACCCGTGAAAACGAAATACAAATCCTCCAATATGTGGATGATTTATT
AGTATCTGGAAAAGAACAACAGCTAGTCAGGACAACTAGTATCAAACTCC
TTAACTTTCTAGGAGAAAAGGGTTTAAAAGTATCACGAAACAAATTACAA
TTTGTCGAACCAGAAGTAACATACCTTGGTCATATAATTGGAAATGGATA
CAAAAAAATTAAGCCCCGAAAGGATTTCGGGCATATTGGCCATTTCGACC
CCAAAAACTAAACACGACATTCGGAAACTTTTATGCTTGTTTGGATACTG
TAAATTATGGTTAGATAAATATACTCAAAGTGTAAAATTCCTTTATGAAA
AGTTAGTAAACCCTGAACCCATAAATTGGACTGCACAAGATGAAAAACAA
TTAGAAGAGTTAAAAAAAAATTATCCTCGGCCCCAGTCCTAAATTCACCA
GATCTCAAAAAGGAGTTTGAGCTTTTTACCAACACTGAAGGGGGAGTAGC
TTATGGTGTACTAACTCAAGAATGGGGGGGTTGTCAGAAGCCAATAGCAT
ACCTCTCTAAATTATTAGACCCAGTGGCAAAAGGATGGCCACTATGTCTC
CAAGCAATTGCTGCTGCAGCAATTCTAATAGAGGATGCACAAAAATTGAC
ATTGCAAGGAAAACTTAAAGTATATACACCGCATGATATTAAAACTGTCC
TCAGTCAAGGGGCCCAGCAATGGCTAACAGAAGCCAGAATACTAAAATAT
GAAATCATCTTAATGAATACAAGTAATTTAGAATTGGCCACCTCTAAAAG
TATAAATCCGGCCCAATTTCTCTCAGGGGAACCCTTGCCAGAATTAGAGC
ACAATTGCCTGGAGCTCATAAATTTCCAAACCAAAGTAAGAGAGGATCTA
GAGAGTACACCATTGCCATATGGAGAAGTATTGTTTACTGATGGTTCATC
TAAAGTAGTAGATGGGAAAAGGGCATCTGGGTATGCAGTAGTAAAAGGAG
CAGAAGAGAAAAATCTAGAAGTAATAGAAAAAGGGAAGTTACCATCAAAT
TGGTCCGCACAATGTTGTGAAATCTACGCATTAAAAAGAGGACTAGACTC
ATTAGAAGGGAAGCCAGGAACCATTTATACTGATTCAAAATATGCATTCG
GAATAGTCCACATATTTGGAAAAATCTGGGAGGAATGCGGGTATTTAAAC
TCAAAAGGGAAAGATTTAGTGTATAAAAACCTAATAAAATCAGTATTAGA
ATCTTTGCTAAAACCAACAGAAATCACAGTTGTGCACATCAGAGGGCACC
AGAAGGGAAATATCTTAGAAGAAAGAGGGAAAGGTATGCTGACAAAATAG
CAAAAGAAGTCTCATTAAGTCCGGAAAGGCCTATAAAAGTCCTTAAATTA
AATGAAACACCAAAAGAATCAGAAATTACAAAGCCCATTTTTAGCGAAGA
AGAGTTAAAAATAATAAAAAAGTTAGAAATACATCATGGAGATAAAGGAG
AGTGGGTAATGAAGGATGGGCGCAAATTCTTAAATAAAGCTCTAGCCAGA
AAATTATTAGCAGAAATTCATGAATTGACCCATTGGGGTGTTCAGTGATT
ATGTGACCACTTCCTCAGAGAAAATTTTTTTATTGGAATATATAATCTGG
CTAAATCAATAACTAAAGGATGTCTAATTTGCCAAAAAGCAAATCAAAAA
GTTATGCGAAAAGTTGAATATGGAGGAAGGGAATTAGCCTTGAGACCATT
CCAAAGAGTACAAATTGATTTTACAGAAATGCCCCCAGTTCAAAAATATA
AACATTTATTAGTTATTGTGGACCACCTCACCCATTGGGTGGAAGCCTTC
CCCACCATTAAAGAAACGTCAGAAGTAGTCATAAAAATAATCCTTGAACA
AATTTTCCCCAGATACGGATTACTTAACCACATTGACTCCGATAGAGGCC
CACATTTTACGTCACACATATTACATAGAGTCATCGAAGCACTAGGGATG
AAATGGAGGTTGCATACTCCATGGCATCCCCAGAGCTCTGGCCAAGTAGA
AAAAATGAATAAAACCTTGAAAAATGTATTAACAAAATTAATCGAAGAGA
CTCAGATGAACTGGCTTAAATGTCTCCCTCTTGCTCTATTACGCATTAGG
ACCAGACCGTGTGCAGATATAGGGGTTTCCCCCTATGAAATGATGTTTGG
GCTTCCCTTTTTAATTACCCCCTTTAGCTCTGCGAGTTATCTGGAAGGAG
AAGCTGCCAACCAGGAGTACTTAAGAGTCATTGGAAGAACAATAGAGCAG
CTAAAGAGAAAAGGATACCTACCCCAAACTTCTCTCTTAGATTCAAATGC
TCATCAGATCAACCCTGGGGACTGGGTTCTCATAAAATCCTTGAGTCACA
CCTCTTTATCTCCTAGGTATGAAGGCCCCTTCCAAGTCCTCCTAACTACA
CACACTGCTGTAAGAACAAAAGAAAGGGGTTGGACTCACATATCTCAAGT
TAAAGGACCAATTCTACCTCCCCCTAGTAAATCAGACTCCACAGTATCTC
AGCCAAAGGCACCTGAGTGGACCATTGCAAAAGGACCTATAGACCTCCGA
CTTACCTTTAAGCGAAAAGAAAAGAACAGCTGAAAAGACTTGAACTGTTC
CAATTTAGAGACAAAGTGTTACTGTAACGCAGTTTGTATTAACTCTAGTT
GTTGTTATAACGCTGTTGTTACATACCTGTAGTAGTCTTTTAAGTTTCCA
CCAGTTCACTAAGTTCTTGTTGTTACAAAGTTGTTGTATCATACATCCTT
CTCCAATTTCAAGTATCACTCAATCCTCCATCAAAATCCTCAAATTGAAA
TTTTGCCAAACCATAAAAACTAATTCCCCTACAGAACATTTTCCAAGAAC
ACCTAAATTAGTACGTGAAAGGGATGAGAAAACTCTGGGAAAGTAAGATC
TTACTTGAGGAGATCCCCACCTCCAAGAGGCAAGCCCGGGTGAGACTGAA
AGCAGTTCATACCGGACTCTTGAGAGGAGTGTTGCTAGCCTTGCTAACAA
TCAATCTAATAAGCAGCGAAGAGTCTAAATGCAACAAGTGTTACCATCCG
ATATATGATGGGGAGACCCAAGAGTCCCTAATAAGAATTCACACTAATGT
GAACCCCAGCTGTTTCAATCATTCCCAAATTTCCACCTGTCAAGAAGGTG
GAAAAACGTATTGGATTGCTAAGAATACTGCCACCTTTCGGCAGCGGTTG
CTTGGAGAGTGTCCTATAGGGGGAGCCTGGTTTTGCTTTGAACATGAGAA
TAACCAAGGAGAATTAATAGATATAATCAACCAAATGGTGGAAAAAGGTA
GCCTTTTTAATCGCAAGTGCAGTAGTAAGCTTCCTATTTTTACCATGTTT
ATTCCCATGTCTAATTAAAATTATAAACTCCACTATACAAACCAGCATAA
AAAATATGACTAATCAAACAAAAGCCAAAATTCTAATGATAGGAACCCAA
AACCCAGAACATAATTCAGCTAAAGAAATCTTAAACCAATATCTAGAACT
ACAAAAGTTATACCCCCAAGAAACCGAAAATGGTGATCTGATGCGGGTCT
AAGGCCCAATCAAAGAGAAAGAGGGGGGAT
>oenMel1-23#LINE/CR1	 
GAGGAGCGGCTGAGGTCACTTGGTCTGTTCAGCCTGGAGGAGACTGAGGG
GAGACCTCACTGCGGTCGCAGCTTCCTCGCGAGGGGAAGAGGAGGGGCAG
GCACTGATCTCTGCTCTGTGGTGACAGNGACAGGACCCGAGGGAACGGCC
TGTCCTTGTGGGTCCCTTCCAACTCAGGATATTC
>oenMel1-23#LTR/ERV1	 
AATTTGGTGCCGTGACTCGGATCGAGATTTTGGAGGGGCTCTCTGCCTGC
GGGGAGGCGCGCCCCACCATTTTGGTGGCCCCGGGGACGGGAGTCCTATC
CCAACCTCGACCGACGAACCTAAAATTAAGAAAGCAAAAGCAAAGGTAGG
AGGGCCCAGTTGACCCCTTAAATTTTGTGCACAAAGTCCGGACGAAGACG
CAGGACGCGTAAGTATAAGGGATCCGTTCGGGCGGGGTCGGGATCCCGGA
GTACAACGTGTGGTGTGTGTGTGAGAGGGGGACTGGCAGCCAGATTCCCC
AAGCGAGTGCGGACCCTTAGTAGTGCGGTTCCCATCGACCCGCGAGGGCG
TGGGCCACGAAACAGGGGAAGCGAAAGTGATTTTTGGTGTGAGTGAAGGT
ACTCCGGAGGAAATGGGGCAGGGGAAGAGTAAACCTCCTGCAAGTGTTAA
ACTCCCACCCATACCTAGAGATAGTCCCTTGGGATTTTTACTAGAAAATT
GGGACCATTTCCCTGGAACGGAAGGGAAGGATAAGGCAAAAATGATATAT
TACTGTGTAGAAGTCTGGGGTGGGAAGGAGATTTCAAGAAACGTGTTCTG
GCCAATATTTGGGTCAACAGAGGATTGGATAAAACAGAGATTAAATATTT
GGGTAAATACAAAAAAACCTGTTTGTTTGGAGGAAAGTGAGTATGCAAAA
ATCTGGATAGCCCGTCCTGAGGTTTTTATCTTTAAATTGACCGAAAAAGG
GAATAACAAAAATAAGAAAAAGGGAGGTAGGAAAGAAGAAATCCTGATGG
TACCCCCTCCACACGTACCCCCACCGCAGGCCCCTGCCCCCAGTGCACCT
CCCCCAGAGGAGGATTCGGATTCAGATCATTCGAGCTACTCAGGACCAGT
CACTAGAGGGAGATCTAGGAAACAACAAGAAAATTTATTTCCATTAAGAG
AAATGCCTATGGGGGGTCCTCAGGCAGGAATAGGATTTATATCTGTGCCC
CTCAGTTCAGGGGATGTTAGGGAATTTAAGAAGGAAATGGGACACTTATT
AGAAGACCCGCTGGGAGTTGCTGAAAGAGTGGACCAATTTCTGGGTCCTA
ATATGTATACCTGGGATGAATTACAGGCCATTTTGAACATCCTGTTTACG
GCCGAAGAGAAAAATATGATTAGGAGGGAGGGCATGCGTATCTGGGACGC
CCAACACGCTCAGGGTCCTGCAGCTAACACCAAATGGCCCCTTCAAAATC
CTCAGTGGGATCATCAGAATCCTGCACATCGAACACACATGCAGGACCTG
AGGACAATCATAGTTCAGGGAATTAGGGAATCAGTCCCGAGAGGCCAGAA
CATCAATAAAGCATTTAATGAGAGACAAAAGAAGGATGAAACCCCCACAG
AGTGGTTAGAGAGGTTGAGAAAGAATTTCCAGCTTTATTCAGGAATGGAT
CCAGATGGTCAAATGGGACAGGCAGTGTTGAAGGTACATTTTGTGTCTAA
ATCTTGGGAAGATATAAGGAAGAAGATACAAAAGCTGGAAGATTGGCAGG
ATAGAGGCTTAGATGAGCTATTGAGAGAGGCCCAAAAGGTGTATGTCCGA
AGGGAAGAGGAAAGTCAGAAACGGCAAGTTAGAATGATGGTTGCTGCGGT
ACGAGAAAGTAGGGAACAGGGTCAGAGGGAGACACAGAGGCGGCCAGTAA
GAGAGCTTAAGGAGTCTAGGGATTCAAGGGAGAGACAGGACATTAAGGTG
TGTTTTTATTGTGGGAAAAAAGGACATTTCAAGAAAGAGTGTAGGGTCAG
GATTCGGGATGAAAAGGAGTTCAAGACAGATTAGAGGGGTCAGGGGCTCT
ATCTCTTGGGGACACGGAAACATCATAAGGAGCCCTTGATAAAACTGAAG
GTGGGTCCCCATGGCCAGGAAATAGTTTTTCTGGTTGACACAGGAGCTGA
AAGATCAACTATTCAGTTTTTGCCAAAAGGATGTAGTCTATCTAAAGAGA
CTGCCACGGTAGTAGGAGCAAAGGGAGAACCCTTTGAGGTGGGGGTTATT
AAAAGGGTGACAGTTGAATCAGAATCAAGAATCGGGTTGGGAGACTTTTT
GTTAGTATCAGAATCTGAATATAATCTATTGGGGAGAGACATGATTATAG
AACTAGGAATTAGGATAGAAGTAGTAGAGAAGGAACTGCAAATTAAACTC
TGTCCTCTCAGAGTGGAGGACGAAGAAAAGATAAACCCTGAAGTATGGTA
TAATCCAGGAAACGTGGGGCAGCTAAAAATAGCCCCATTTTCGGTGATTA
TTAGAAATCCGGAAGTCCCGGTAAAAATAAAGCAATATCCCATATCCCCT
GAGGGTCGATGGGGATTAAAACCTGAGGTAGATAGATTGTTGAGCAAGGG
GCTGCTAGAACCATGCATGTCACCCTTCAACACACCGATACTCCCTGTGC
GCAAATCAGATGGCACTTATCGGTTAGTGCACGACTTAAGGGAAATTAAT
AAACGCACAGTGGCTCGGTTCCCCGTGGTGGCAAATCCATATACACTCTT
AAGTAAATTGGGGCCTAATAACTTATGGTATAGTGTCATAGATTTAAAGG
ATGCCTTTTGGGCTTGCCCTCTCGACGAGGCAAGCCGGGATTACTTTGCA
TTTGAATGGGAGGACCCCGATACAGGGAGGAGGCAACAGCTGAGGTGGAC
AGTGTTACCCCAGGGGTTCACAGAATCTCCAAATTTGTTTGGACAGGCAT
TGGAACAAATTTTGCAGGATTACCAAACAGGACCGGGAGTAACCCTGATA
CAATATGTAGATGATCTGCTTCTGGCAGGGGAACATGAGGAGGATGTAAG
GAAAGAAAGTATAAGGCTGTTGAATTTTCTGGGACTTAAGGGGTTAAAAG
TTTCTAAGACTAAACTTCAGTTTGTAGAGGAGGAGGTAAAATATTTGGGG
CACTATTTAAAGAAGGGAGAGAAAAGAATAGACCCTGAAAGGATCCAAGC
AATTATGTCACTACCTATTCCAAAAAACAAGAGACAAGTTCGTCAAATTT
TAGGACTTACCGGGTACTGCAGGCAGTGGATTGAAAATTATAGCAGTAAA
GCTAGATTTCTTTACCATAAATTAACACAGGAAGGGCTAATGAAATGGAG
TCAAGAAGACACAGAGAAACTTCAGGAATTAAAGGAAAGTTTGGTCCATG
CCCCGGTCTTAAGCCTCCCGGATGTGAGGAGACCATTTTTCTTATTTGTA
AACATAGAAGAGGGTATTGCATTTGGGGTACTTACCCAGGATTGGGCAGG
GAAAAAGAAGCCTGTTGCATATTTATCAAAAATTTTAGATCCTGTGAGTA
GGGGCTGGCCAACCTGTTTACAAATAGTGGCCGGATGTGCCCTATTGGTG
GAAGAAGCTAGAAAAATTACTTTTAATGGTAATCTCAAAGTAATGTCCCC
TCACAACATCCGGAGCGTATTACAGCAAAAAGCAGAAAAATGGATTTCGG
ATGCTAGGCTTCTAAAGTATGAAGGAATTCTGGTAGAGGCACCCAATTTG
ACGTTAGAAACCACTGCACTACAGAACCCGGCCGCATTTTTATACGGGGG
ACCGGAGCATGAGTNTTTGACCCATGACTGTATAGCTACAATAGAGGAGC
AGACGAAGATTAGACCGGATTTAGAAGAAGAGGAATTAGAAAGTGGTGAA
AGACTTTTCGTGGATGGATCCTCCAGGGTAATAGAAGGGAAAAGAAAATC
AGGGTATGCAATAGTGCAGGGTCCGAACTTACAGGTGGTAGAGTCGGGTG
CATTAGATAGATCATGGTCTGCCCAGGCATGTGAATTATATGCAATATTA
AGGGCCTTGAAACTTCTTGAGGGGAAGGAGGGGACAATATATACTGATTC
TAGATATGGATTTGGAGTAGTCCATACATTTGGAAAGCTATGGGAAGAAA
GGGGCCTTATTAACTCACAGGGGAAGGATTTGATACACCAGAAACTTATA
GTTGAGATACTAAAAGCTCTGAGAGGGCCGACAAGGTTAGCAGTGGTTCA
TTTAAAGGGACACCAACGAGGAATAGATTTAAAAAGCAGGGGGAATAACG
CTGCAGATCAGGAGGCAAAACGGGCAGCCCTAAAGGAAATGGTCCTAAAA
GAAAAAGGGGGGCAAAGGGGAAAAGATGGAGTCAAGGACGGTGAAAACAC
TGACACAATTTTTACGAATGAGGAGAAAGAGAGACTTAGAAGAATGGGTG
TTACAGAGGAAGCAGGAAAGTGGATATTAGCAGACGGCCGGGAAGTGCTA
CCAAAGGCAATAGCTCAGAGGGTATTGTATAAGTTACATCAGAAAACTCA
TTGGGGAGCCCAGGGGCTGGTGGATCACTTTGCCGCTAGGTACATGAGCA
TCGGGCTCCACGATATAGCTAAACATATCACAAAGGGATGTCCTACCTGT
TTGCGGGTAAATCGAAGTAACCTCAGAAAATTACCCTATGGGGGAAGGCC
TCTAGCAAAACAACCCTTTGCAAATATTCAAGTGGATTTTACCGAATTGC
CAAAGGTGGGGAGGATTAAATATCTTTTAGTAGTAGTAGATCATCTTACT
CATTATGTGGAAGCCTTCCCGACATCAAGGGAAACCGCACGAACAGTAGT
AAAAGCCCTGCTGGAGGAGATAGTCCCCAGGTATGGTGTACCAGAAACAA
TTGACTCTGATAAGGGGCCGCACTTTACATCAAAGGTAACTCAGGAGCTG
GCAGCAGCATTAGGAATAAAATGGGAACAACATACTCCTTGGCACCCTCA
AAGTTCAGGCCGGGTAGAAAGGATGAATGGAGAAATAAAAAAACAACTTA
CTAAATTGGTACTAGAAACAAAATTATCATGGGTTAAATGCATTCCCCTA
GCCTTGCTGAACATTCGGACTCAACCCCGGGCGGATTTGGGAATTTCCCC
ATTCGAGATGTTATATGGCATGCCCTATAGTTTAGAAAAGGCACAGACAA
ACCCAAATGTTAGTGAACGATACATTAACGAGTATTTAATAGCTTTGATG
AAATTCAAAAAACAGCTATGGGAAAAAGGAATGTTGGTTCAGAGACCACC
ATTAGATCTTGTATTACATCAGGTTCAGCCCGGGGACTGGGTACTGGTCC
GAAGTTGGAAGGAAAATCCGATAACACCCAAGTGGGAAGGACCTTACCAG
GTGTTGCTTACAACAGACACAGCAGTACGCACTGTGGAAAAAGGGTGGAC
TCACGCAAGCCGAATCAAGGGACCAGTAGATCCGTCTAAATTCACCAACG
ACCCCGGGTGGGAAGTGAAGGGCACACCTGGGAGCCTGAAACTGACACTT
AAGAAGCGAGTAAGCTCTAATTAAAAAGACAGGCTACATTATTCCCACCC
CACCACAGGTATGAGACTTTTTCCACATGGGAGATAGACTGTGGGATCCA
ACATACTATTCCTTCCTGGCAGAGCTCCGAGCAACAGGAGCACCAGTGGG
GGGGGGGGAAGATCTGCTGAATGCAGCAGTGAAAATAAGATGTAATGCTG
AAAATTGCTGGGGAAATTGTAACCCTTTTGTATGCTTTATTTGTTTAGTT
TGTAAGGAGGAGTGGTGGACCCATTGCAGCAACAGTTACCCTCCAAGGGG
AGTGTGTAAAAATTGTTATTCGGACCAAAGGCTACTCACCTCTCAGGTCC
TGGCTACCAAAGTGGCTGCCAGAGAACTTTTAAGAGGGTCTGAAGAGTGG
TGGAAAATTTTTACAAAGGGGATAAACCCCCAGTTCTATTGTTATCACTC
TAACGAACCTGCCCCATTTGTGGCTAGGATAGTAGCCGCCCTGTGCAGAC
GGTGGGTACCTGAACTCAGTTGCTATACCCCTCAAATTAAGAACCGCAAG
TGGTATAAATACATAAAACGTATCAAAAAGCATGGGTCAAACACCCCTCC
TGAAGAATACTCCTGCTGCCGAGAAGATGGAACTCCCCATAGCTCGTNGC
AACCGAGTTGATGGGCAAGGCAGAGGAGACGAGAGCAGTGGAGGGGGGAG
CCCGAGCAAAAGGGGAAAACGAGGAACAGGTACCCAGAGCCGTCGAGAGT
CCAGGGGAAGGGAAAAGTCTGAGGTAAATTGGGAGGAAAATAAAAAGAGC
AGTTGTGGAAAATGGGGAAGCTACCACCTCCAATTAGGAATCTTATATAT
AATGCTTTTGAGATCTGCGCTTGCAAGCCATGAACCCTTTAAATGGTCAC
TAATACGGTGGGAGGGCCAGAAAGNANTTCAAGCACAGTGGTNACTTCAG
GAAGGCCCTAGCTTTAACATAACCCTGGATGACCTACTTGATAGGACGGG
TTCTAGCCCCTATAGTGTATTCTACATGTGTCCGGCATCTAACCCAGGGA
GGTCATACTGTAACTACCCCGGAGAATTTTACTGCGGATATTGGGGCTGT
GAAACAATTTCCCTGGGATGGTCGGTTCAAATCCAAGATAAATACTTAAG
GGTTGAAAGAGGTCCACATGGATGTAAAAAGCCCTGGACAGATCCGTCAG
GGGTGGTGACTTATATCGGTACTTGCAAATGGGTCTATCTTAACGTCACG
CAACCCCAAGACCCAGGATGGGTAGTAGGAAAATTCTGGGGAGTTAGAAT
ATGGGAACCCGGGAAAGACCGGGGGGGGGCATATTGTTATAAAGAAGGAA
ATTGTACCCCACGATCCTCAACCTGTTGGACCGAATCCTGCAATAACAGA
CTCAGAAGCCACAATAATAAATCAAGGTGATTTAGACAGCATGACCCCAG
AAAATTTCACGGAGGCCAATAATAGGCGAACAAAAGTAATAATATAGAAA
AAGGGGGGACT
>oenMel1-24#LTR/ERV1	 
TGAAACACTAATCTTAGAAAATTANGATTNTAGTTACCTTGCTGAAAACA
ATTAAAAGTTCGAAGTTAGAAGGGAGTAGTTATCTGAAACTTAAATAATT
GATTGTCTGTCATTTCGTGTTTGCTCAGCTGCGCNTACAATGGGAAAAGA
CGAAACTAGTGAGCAGATCCAAAGGAACATAGACAATGCAACCAGAAACC
CATTCTTTGGAAAACTGGACTATCCCCAGAAATNATTTGTATTNTCANTG
ATAGAAAAGNTCAAGAGTTTAGGGTGAGGAAGACTTGCCTTACTTCCTCC
TTTTAAGACCCCTCCCCACGAAAACCACCCCAGACTT
>oenMel1-25#LTR/ERV1	 
GTTGGCAACTCTGGTGGAACCCTGTTCTCTCTGGCCAAGGGGCCAGTGGG
GTTTGGGACCCCTCTAGGGTGCCCACCTGGGATCTTCCTAGGAAGAGGGC
TCCTTTTCCTCACTGGCACCCTGGGGAGCAGAACTAGAACTGCCGGAGAT
ACGGACAAAAAGGTATGTTTAAAAATTATAGACAGGTACCTGTAAGAGAG
GCAAACTGGTAAGACGCTGCGAGACGTCGAGTGCACGGTGAAAAAGCCTA
AAGTGAATTTGTTTGTAAGTTTCCATGGAACTTGGTAGTGATTTGTGTTC
CAAGTGGGGCTGGTAACAGCACCAGGAACTCTTGCCCTGTAGTGGGGGAG
TAGCAGCAGGCCAGTCGTGGCTGCCAAGAGTAGAGCTCGCTCGGCAGTGG
GTCGGCGGAGCTCGGGCAGTGGCAATAACAGCGTTGCCAGTATTGTTGTG
GTACAGAAACAGTGGTGGCACCAGTTTCATTTGTGGTTCAAAGGCGGTGT
GGTGGTAATTTTCAACTTGGATCACCAAGCTTGCGGGCGTCGGTGTGTGG
TGACTCCTTTTGTGGGCTTGATCAGTTTGTGTGCGCCAAATGTATACGTG
TGTTTGAGCATGCAGCTTGTTTTTGTGAGCTTTGTGTGCGTGAATTGTGG
GTCAGTGGCGCGCCGTATGTGTTTTGCTTTGTGTGCCTTTGGGAGTGTGT
TGGCAAAAGTTTTGCATTTGTAAGTTGTGAAAAATTTTGAGGTTTACACC
TGACTAATAGAAGGGATATTCACACTCAGGAGGGCAGAGGAATTTGGAGT
GCTGGCATTTGAATTGTGTGAGCTAGGCTGTGTGTGTGTATTTTAACTGT
GTGTAAGCAGAAGAATTGTGGATTTGTGAAAAAATATAGTTAGTTGTTTG
TCAAGCTTTAAAATTGCTAGTGTGAAAGGTGGTGTTTTGACTAAGCGTGG
TTAGTTTCTAAGTGCAGAGGGGTGAGGCAGACATGAGCCCAGAGCTGCTT
CCTTCCCCCACCGCAGAGAAATTGTGTTTTGGCCAAAGTTTGATAGATTT
TTGGCAGAGCATTGTGAATTTTAACCCTAGGTATAACGAGAGAGGTTTGA
CACCTATGATTAGTAACTAAAGGGGGAGAGAATAGATTTGTTTTGTAAGT
GAACTGTTTAAAAGTGTTTGGTTGTAATATGTGTGTCCCTTACATTCATT
TTAAGTAATTCGGTTTATTGGTTTTCCCTGTTAACTCTTTATTTTGTTGG
TTGCTTTTATCCCTTCCCATTTCCTTTGCTGATAAAATTATATGCCAAGG
AATAGAAAGTTCAGGGAGGGAGAACCCAGGACAAAGGAGCTTCCCTGTCC
AAGAGAGGTCTGTGACTGTAACCCCTGAGTTGTGTTTCATTGTGTAGTTT
GTCGAGAGCTGTGGGTCAGAAAGTGTATAAGTGGAAGATCTTTGTACCAA
GTTACTGCTAGGTGAAGCTCCAAAGCTGGGATAAGGTTAAAAGGCATTGA
GAGAAAAGGTATATTGTATGGAGACTCAGGAAGAGGAGACAGAGGAATTG
CTTAGACCACCCCCTAGAAGACAAGGAAGAAGGAGGGTGGTAGGGGAAGC
AGATTTGAAATTACCATCGACTTCGGGTTTTACCCCTGCTTCATCCCCCT
TCATCCTCACTTGAGAGAACAGTAATTAATATGGGAGTCCCTTCCCAATT
CCCGAGCCAACCCAACAGCATCCATCCTATTTTATGTTATGCTATTTTAT
GTTTATGCTGTTAAACAGAATTCCTTTCAGACTCCTTCTGAATTTCTACA
CCAGTTGCAAGGAGCAATGCATCAAAACACCACTCTGGATCCTGAATCTG
ATAAGAGAATACAACAATTGGTAAACTTGTTTTTAGGGCAATCTACAAGT
GGCATCAAGTGAAAGCTCCAGAAGATGCAAGGCCCAGCAAGACGGACCTT
GGGAGACTTTGCTAGATGAGGCATGGAGAGTTTTCAGCAATCGAGAAGAG
GGGTGTAAACCAAGGACAAGGAAACTAGTAGCAATAATACAGGAAAATGT
AAAAGGGCTACTGGCCGACTTGAAAAAGCATATTTTTGTAAACCATAAAA
GTATAAATTGAGAAAACAGTGGGGAATTCATCAATTTTTTATATGACTAA
AGGTCCATCTGCACTTTTAGGCAGGGGTCTGCTAAAGCAGCTGGAAGCAA
AGATAATATTTAAAGGTGGGAAAATTAGTTTGGAGGTAAAAGATCAACAA
TATGTGAAATTGTTAAGCTTAATGCTAATAACCAAAAAAATTGAAGTTGA
AAAAGAAAAAAAAAATTATTAAAGAAATAAAAGATCAGGCATTCCCTGGA
GATGGGCCTCTAATATACCAGGGAAAGCAAAGAGTGCTCTACCAGTACAA
ATCCGGCTTAAGGAAGGAGAGCAATTGGTAAGGGTCAAACAATATCCCTT
GAAAAGGGAAGACAGAGAAGAAATTAGCCCAATCATTGAAAACTTTTTGC
AAATAGGACTATTAAAAGAGTGTCAATCTGATTTTAATACTCCTATTTTG
CCCCTAAAAAAAGCCTGATGAATTATACAGGTTGGTACAAGATTTAAGAG
CTGTTAATAAGATAACTGAAGATTTATACCCAGTGTTGCTAACCCCTACA
CCTTGTTAACTTTTTTTAACACCTGAACTAACCTGGTTTACTGTTTTAGA
TTTGAAGGATGCTTTCTTTTGCCTCCTTCTTCATGAAGCCAGCCAGAAAA
TTTTTGCATTTGAAAAGGAGAATCCCAGAACTGGACGTAAAACTCACATG
GCTCACATGGTGTGTACTACCCCAGGGGTTCAAGAACTCCCCTACCATAT
TTGGAGAACAGCTGGCAAAGAATTTGGAGTCTTGAGAACCCACACCAGAA
GGACAGCTGCTTCAGTACATGGATGACCTCTTAATAGCCACCCGGACCCA
AGAGGCATGTGTGGATTGGACTGTAAGCCTCCTAAACTTTTTGGGCCTGC
AGGGGTACCAGGTATCCCAAAAGAAAGCCCAGATGGTGAAACAAACAGTT
ATTTACCTGGACTATGAAGTAAGTGCTGGACAAAGGACTTTAAGGCAAGA
CCGCAAAGAAGCAATATGACAAACCCCAAAACCCCAGACAGGAAAAGAAC
TGAAAACCTTTCTAGGCATGACGGGGTAGTGCTGACTGTGCATTTATAAC
TATGGATTGTTTGTTAAACAGTGTATGCCTTAATCACAGAAGGGAGGAGG
AATCTTCAGTGGACAACAGAAGCAACACGAGCCTTCAACCAACTGAAGAA
GGCTCTTATGTCAGCTCCAGTCCTGGGACTTCCAGATGTGAGTAAACCAT
TTTTTCGTTTTCTCATGAAAAACAAGAGATTGCTCTGGGAGTACTAGGAC
AAGACCTGGGGCTGTACCAGAGGGCAGTCGCCTACCTCTCCAAACAACTG
GACACGCCAGCCAAGGGGTGGCCAGGGTGCCTCAGAGCTGTTGCAGCAGT
AGCACTCAACATCCAAGAGGCACGCAAATTCCCCCTAGGCCAGAAGATGA
CTGTGCTAGTATCCCACAGAGTGTCTGCAGTCCTAGAGGCGAAAGGGGGA
CATTGGCTTTCCCCATAAAGACTTCTAAAGTACCAGGCCATACTGGTAGA
ACAAGATGATGTTAAAATTGTGGTAACTAACATTGTGAACCCAACTTCTT
TCCTCAGTGGGAGCATGGGAGAACCAGTAATCCACAACTGCCTGAAGATC
ATTGAAGCCAACTACTCCAGTCACCCGGATCTGAAAGACACCCCTCTTCA
GAACGCTGAGAGCTGGTTCACTGATGGGAGCAGCTATATCATCAGAGGAA
AAAGACATGCTGGGGATGCAGTTACCACAAACAGAAAGATAATAGAGTTT
GGACCATTGCCAACAAATTCCTCTGCACAAAAAGCTGAAATAATCGCCTT
AACCCGGGCCTTAGAGCTGGCAAAAGGAAAAAAAAAATCAACATTTATAC
AGACTCAAGTCTTTTTTGAAGTGGTTCATACACACGGAGCTATTTGAAAA
AAGAAAACTGCTGAACTCACAAGAAAAAAAAATTAAACACACACAAGAAA
TACTAAAACTATTAGATGCAGTTCAGTTACCTGAAAAGCTATTATGTACA
TCAAGGCACACCAAAAAGTGAGCTCAGAATTGGAGAAAGAAATATACTGG
CAGACAGAGAGGCAAAAGACGCAGCCAAAGGTGAGGTACCCAATGAAATA
GTCAAGGCAGCATTGATTCCAGATGGAAAGATCTCTATTGAAGGTAAGCC
AGTATATAACAAAAAGGATAAAAAACTTATTAAGGAAGAAGAAGCAACTT
AAAACCAGGAAGAGTGGGCTGTAACCAAAGAAGGAAAAGTTGTAGTACCT
TCTTACTTGTTGTGGTCACTAGTGCTAAAAGTACATGAGAAAACACATTG
GGGAATGGACACCCTGTACAATTATTTAAAGGATAGAATTCTGGCTAGAA
AATTACAAGGCACAGTTACACAAGTAACTCATCAGTGTGGTCTTTGCCTC
CGAACTAATCCTAAAAACTTTCCAAAGCCTAAAGTTGGACAAATTAGAAA
AGGTTGTGGACCTGGGTAGCAGTGGCAAATTGATTTTACGGAATTGCCCA
GGAAAAGGGGGGTATCGTTACCTATTAGTGTTAACAGATACGTTTTCAGG
ATGGCCCAAAGCCTTCCCTACCCGGACAGCTAAGGCACAAGAGGTGACCA
AGGCATTGTTACAATAAATAATACCACATTTTGGAGTCCCAGCCGCTATA
TCTTCTGATAGAGGGCCACATTTTACCTCGAAAATTGTACAGCAAATTGT
ACACCTAGGGATAGATTGGGAATTGCATACTCCATATGCATACTCAATCC
AGTGGCCAAGTAGAGAAAATGAACCATTTGATCAAACAACAAATTGTTAG
GCTGGAGCAAGAGGCAAATTTGCCTTGGCCCCAGGCTCTTCCACTGGCAT
TAGTACGAATTAGAACAAAACCAAGAACAAAAGGAAAATTAAGCCCTTTT
GAAATATTGTATGGGAGACCATATGTGGTCCAAGAAGAAATAACACCCAT
TCAAGTAGAGGAAGAAACTCTACACAAATACATGGTGGCCCTGAATAAAC
AGCTTAGGGAAATTGGAAAATATGTGGCTGGGGCCTAAAGCAGAGAATTA
GATGGGCCAGTGTACATGATGTACATGGTGCACAACCTAGGGATTATGTA
TATGTTAAGTCTTTTGCAAAAAAGACTTTGAAACCACAGTGGGAAGGACC
ATTCTAGGTACTCCTCACCACCTTCACAGCAGTCAAGATCAAAGAACAGA
AGGCTTGGATCCATCACTCCAGAGTGAAGAAGTCTCCTAAAGAAATTTGG
AAAATTGCACCAGGTGACGGAGACCTGAAGCTGAAATTCACCAAAAACAG
TGAGTAATGGACTTAGAGCTATCATGGACATAATGCGAACGGTTGTGACC
CTTGTGGTCATTGTCATGACTATAATAAGTCAAAGCAACACCACACCAGT
ACAATGTAACTGGGATTTACCAATGCCAAGAGAAAGCTTATGATCCCTAC
TCTCGTCGGGCTTTGAGCAAAATGTTAAGGGTCACAAATGCAAGTATGTG
AGAAGGGAGGAATGTTTGGAGATATGAATATGCATTCGTACAAGATAGGT
TCCATGAGGCTTACCATCCACCCATGAAACTTATCCAAGTTGGTCCTGGA
TGCTGTGACAAATGTTGACCACGTGTCCTGAATTTAGACTTAAAATTGAA
GGGTGCACAGCAAAAAAAGTTTAATCTTGATTTTTAACTTTACTCAATAT
TGCATCGAGTTTCAGAAAATCAAAGCCAAATCAATCCCACCTGTGTCGAA
AAGGGCTGTAACAATCCAAACTCCAATTATTTCAGAGAAAAAGGAACAAT
ATATGTGAAGGAAATTTAGAAAATAATAAAGATACTTTCCTAGACACAAA
CCAAAGCATTTGCCACTTTAAAATGCATCTAACCAACCAAACAACTTCAC
TTGTGTATATAGGACAAGGTTGTGTCTGTCTCCGAACAGCATGTCTCACC
ATAATAATAATACACAATCAAATCGTAGATGAGACTCAATTCATTTTATG
TGTTTGCAATTTTGCTAAAATCAGAGGATGCAACTTTTCCTATCAGGCAC
CTGTAATATCACATCAGTACATAAAGGCAAACCTGGTTACTGTGCAAGAA
ATACTGCCTGCACCTACAGAAATGAATTTAACCCTAGTCGCTCAACTACT
GAAATATCAAAAATCAAAAAAAAAATTAAAACAGATCCAAAATGAAATGC
AGAGAAATAGACGTTGATCACTATACACCATAACATGGAGACCTTAAAAT
GAGTTTTTAATTAATTTGAAGAGCATCTGTCTCATCATTGGTGAAATGTG
CTATTTGGATGGTCACCAACAGCAACCAGTTTTCTTAATGCCTTAATTCA
CCCAATCACAGTGCTGCTTATTTTAGTCAGTATAAGTTGAATTTTGTCTA
TTGCTGTACTTGTTTGGAATTAGAAGATATTACAACAAGTGGCAGACTTA
GCATCACTATCAAAGGCCCATGGCTTAGTCTTAAAAGATCACTGCCATGC
ATCTTGGATAAATGAAGAGAAATCCCCATATTGAGTAAAAGAATTTACTC
ATTTCAAAGGAGAAGTGGAGAA
>oenMel1-26#LTR/Unknown	 
TGCTGGGGCATTAGGCATTTTGAATCACAATGAAAAGCTGCAAAAGTAGG
GTAAGGGTGTTTTATCCCCACATCGTCCCGNTGTGTTATCTCCCCAAGCC
TCGGGCCGCGGCAC
>oenMel1-27#LTR/ERVK	 
TCTGGTGATGCCGACGTGATGGGACGGGCGCGCTGACGAGCACCACCACG
AGTTGCACTCTGTATCGGAGCGCTCTGCTGACGAGAGACAAGGCTTGCTG
ATCTCAGTCATCCGAGAGAGACGGGAGCCCTTCGAGGCTGGTGGCCACAA
GCTGACCGGTGAGTCAGGCAGACAATTGTTTACGGGAATCGGGATGAGTC
TCGCTGCATCAGCGGTAGAAAAGGAAACTCTGGACGGGCTGGCCCGCGTC
CTAGATAAAACTGAATACAAAGTCAGCCGTAACAGTCTAGTGGACTTACT
GTTGTGGGGCCGAAGACGGGGATATTTTAAGGTACCCCAAGATGCTTTTG
ATTTGGAGACCTGGAACCACGTCAGCAAAGGTTTATGGGACAGTATACAG
GTTGGCACTAAAGGTGTTGAAGATCATGCAAAAACATATCGGCAAGTGCG
GCTTGCGTTAGAACAACTGAACGCTGAAGCTGAAGTCGGCCGAGCTATAC
GAGACAGCATTAAGGAAGCTGAGAAGGGTGATGAAAAGAATCAGAAGGGA
GGATGTGCTCAGATGGATATTCTTGCCACTCCAGCTACAAAAGGGGCGTA
TGATAACCTCATTCCCCCCTTCTGTCCCGACGAAGGGGTTGGTGGAGCTG
CTCAGACAGGACCAAGTGCCCCTCCAATGGAGGTAGACCCATCCACTGTG
CCCTTGCCGTCCGAAAATCCAGATATACAAGTCGCTGAAAGGGTTAGAGA
ACTGTCCGGACACATGCAGGAATTATTGAGCGAATTGCAGAGGCTTGATC
CAGGCTCAAACAAGCGGCGAATTGAAGAGGCGTATAAGAAAGCTTTGGAG
GCTATAAAAGAAGGACTAGAGAATGTAAGCGCACAGTTAGATTCCAGAGA
AGAACGAATGGTAGAACAAGTAGAAAGGCGAATGCGGAAGCTAATGCAAG
AGGCATTAAACAGAGACTGGGACTCTGAAACTTTACATCACTACTTGCGC
ACGAAATCTGGTGCGGTGCATGGCTTGACAGTGTCTGAATGGCAACAGAT
TGACCTCACGCATGCTGCTTCGCTGAAGGCTTCAGAGTCAGGAAAGCAAG
GAGGGATTGGAGAACGAATGAAAGCTTGGCTGTCAGGCTCAGAAAGCGGT
TCAGAGGAGCCGCCACGGGATCTGTCATTCGATCCGAGGAAGCGATACAA
GGGACTGGCTGAAATTATGGGAGAAATTACCCTCGGACCGTTAGTAGCAG
CACCTGAAGTTAGTACCGTGAACAGACCGGAGTGGAGAGCATTAGATTGG
GCCACAGTGACTAAAATACAGCAAGATGTAATGAATTATGGTATGCATAA
CCCACTAGTCCAGCGACAGGTTACGAGCCTGCTAAAATATCAGGATCTTG
TCCCCAGGGATATACATCTACTGATGGAGCTCATGTTGGGCTCAACAGCC
TTCACATTGTTCTTGACAAAATGGCAGGGTATTTTAGAAGAAAAACAGGT
TGAAAATCTGAATTTAGACATGAGGGATCCTTTGCGACTAGCCACAATAG
AGCAGTTGATGGGAACGGGACAATACCGGGACCCCCAGACACAGGCGGCA
CTACACTCACGAATTTTAGGACAGTCAAAGGCTGCTGCCTTGGAGGCATT
CGCAGCTATGCCACAGATTGGGAAACCACGACGACCATATTTAAAGATCA
TGCAAGGAGCGAAAGAGCCCTTTATAACTTTTGTTGACAAAATCAGGGAT
GCTCTTGACGCAGCTAGTCTCCCCGAAGATGCCAAATTAATAATGTTAAA
GGAGATAGCTACACAGAACGCCAATGCTATTTGCCGGCGCATAATTACTA
GTCAACCTGCCGGAGCCTCCCTTACACAGTTGATCGAGGTGTGTGACCGA
GGCCCCCTTGAGGAGGAGAAGATAAAGGCAAAGATCCATGCCAGTGCTAT
GGCACCCGTGCTAAAGCAAATGCTTACCCAGGGACGAGGGGATCGAGGAC
CAAATTGTTTTGCTTGCGGGCAACCAGGTCATTGGAAGAAGAACTGCCCT
CAGAGAACTCGAAAGAATGAACAGTCCTCATCAGCGGGTTTCACTGGGAC
CTGTTGGCGGTGCGAGAAATTTGGCCATCAGGCTAGAGAATGCCGCTCTC
GGTTCAAAAAGGATGGTACTCCCCTCGGAAACACTGCTAGCACCACTTTC
TCGGGAAACGGGAAGGGCCGCGGGGTGAGCGCGGGGAACAAATACTCGCC
ACAAACCCCACAAGTTCTGGCTGCCTCAATGACCTCGTCGCAGCTACAAG
AGGAAGCACAGGAGTCGGTTTGGCCCTGGCAGGAACAGTGACTATCTCAA
ATGATCATATCCTTGTGTTAGACTCCACTTCTCGAGGACCACTCGGAGAT
GGATTGGCTGCCTTACTTATCGGACGATCCAGTATGAGCAAAAGAGGGAT
TTTTGTGCTGCCTGGATTGATTGATTCGGACTATACTGGAATAATTAAAA
TTATGGTCAAGGTTTTCATACCCCCCATTACCATCCCGGAAGGAAGCAAG
ATAGCGCAGTTAATCCCCTTTTTTCCACAAATAAAAAATTGTAAAAAGCA
GGAAAGACAGGATAAGGGATTTGGAAGTAACGGAAACACTCTTGTCCTGC
TCACGCAAGAAGTTACCATGGAACGCCCAAAGGATGCAGTAACCATCTGT
CACAAAAATGGGGAAACACTTAATTCAATGATGCAACCACCTACAATCGT
TACGTTATTAGATACTGGATCAGATGTGACCATTGTTCCTTTAATGCATT
GGCCGCGACACTGGCCTCTACAGCGCTTTGCTGGACAATTGTCCGGAATA
GGAGGGCAGACGCAAACTTTTCAGGCTATAGATCACTATCGTGTGGTCAG
CTCTGATGGACGTGTGGCTTATTGCCAACCTTTTGTGTTAGATACTACCC
TGTGGGTTGCCAGCCGAGACCTGCTGTCTCAATGGGGCATGGTCTTACAG
GCTGCGCCTTTTGTGCGGCGGCCACTGGGGTCACGGCCTCCCCATCATCC
AACTGCGATGGCTGACTGATAAGCCTGTATGGGTACCCCAGTGGCCGCTG
CCCCATGAAAAAATAGAGGCCTTAAAGAAACTTGTGAATCAACAACTACA
ACAAGGACACATTCGGCCTTCTACCAGTCCTTGGAATACACCGGTATTTG
TTATAAAGAAGAAATCTGGAAAATGGAGATTTCTACATGATTTGAGACAG
GTGAATGCAGTCATGAAAGACATGGGAGTGCTTCAGCCTGGGCTTCCCTC
TCCTGCTGCATTACCCCAGAAATACCACCTGTTTATTATTGACTTAAAAG
ACGGTTTCTTTTCGATACCGCTGCATCCTGATGATATGGAGAAGTTTGCA
ATCACTGTGCCTGTAGTGAACAACGGTGGCCCAGCACATCGCTATGTGTG
GACCGTATTGCCTCAAGGGATGAAGAACTTCCCAACTATGTGCGACTGGT
ATGTGGATCTTGCATTGCAACCTTGGAAGAAAGACCACCCGGAGTACATA
GTGTATCACTACACGGATGATCTTTTGATAGCCTCCAAAGAAAAATTACC
AACGTCAAATGAGCACCAGTTGTTAAAGACGTTGAAAGAATTTGGACTAA
CTATAGCAGAAGAAAAAGTTCAGAGACAGGCTCCCTGGACCTATCTTGGT
ACGTCTGTCACAGCTAACCGAATTCGACCTAATAAACTTCAGCTAACAGC
GAACATAGCAACAGTAAATGATGTGCAGAAATTGGTGGGTGACATTCAAT
GGGTCCAGACAGGGTGTGGTATTACCACAGAACAGATACAGTCTTTATTG
GACCTGTTAAAAGATACTAAAAATCCAGCAGAGCTGCGGCAACATACTGA
TCAAACTCGGCAAGCTCTGAAGGAGGTAGAGCACGCTCTAAGTACGACTC
AAGCATATCAGTATGATCCAAATTTACCAATCCAGATTGCGGTATATGGT
GCTCATTTCCCTACAGCAGCTGTTATTTGCCAAGTGACTCCTAAAAAGAC
TGTCTTAATCTTGGAATGGGTATTTACTACTGCATGGCCAACGGAAACAG
TGTAAACACTGTGTGATTAGACAGGAAACTTAACTTTGAAGGCCAGGAGA
AAAGTGAGACAAGTATTTGGAATCGAGCCTGAGAAATAACTATTGCCATG
GAAAACCGGGGATTTGGTAGAAGAATGGTCTCAATCAAGCATACTATTTG
CAACCACTACTCATGGGCTGAAAATAGACGCTCATTATCCTGCCCACCCA
CTGTTTAAAACCCGGGTTGAAGTTTCTAGAACTATAATCGCAGAGCGACC
CATACCGCAAGCAAAAACGCTGTTTACTGATGCCAGCAGACGTACCGGCA
AGTATGGTTACGTGTGGTATCACAATGAAGACTGGCAACAAAAACTTTGT
CAAGAGAAGGGTCATTCTGTTCAAGAGTTAGAGCTGAAGGCTGTATTCAT
TGCATTAATGGATCATAAGGATGAAGCTCTCAACTTGATTACAGATTCTC
AATATGTGGCCGGTTTGTTACCAAGACTGGACTATGCCATGATTGGACCA
TCTTCTAATGAAGCCATTGGCCTAATGCTATGTCACATATCCAGTCTCCT
GGTGGAACGAACGCTTCCCATTTGGTGCTCACATATTCGAGTCATACCTC
CTGGTTTGGATGTATGGCTGAAGGTGGCGAGACACGCTGGATCCCGGCAA
AGTGGGTGAGGCCCTTCTTAGGGCCCTCAACATCATTCGAGAACGAAGAA
AAGGAGAAAGCAGAAGAGAAGAAGATAGAAACGAAGAAAAGAGAGGAACA
GAAGGAGGATACGTAGCAGTGCATCTATCCACAGAAGACTGGGAGAAGTG
GCGCCAGAGAGGAAAGACCCATTTGCAGCCCTCATGTAACGAGTTTAATC
TTCTATACCTTTACCACAGTGATCCTGATCTAAGGTGTTGAATTCGTTGG
GAATCACCATCATTAGAAGATGCATTAGCATTGCTGCGGGTTTTTCTGCT
GTGAAGACAGCATGTCTTAGAAAGAACTTGCAAAAGCTGCAAGGGGACTC
TTGATCATATTGTAATACTGTGTGTGGGTTGTAACAGAAAAGTGGAGGTT
AGAAACCCCAGATGGAGAGAACAGGCATTTGGAGGGCGTGCTAGGTGTAC
ATTCCCTTATGAAATTAGGAGCTTTTGGGGGCCACTATGACAGCTAGTGG
GCAACAAGGTACTACGACAGCTGGGTTTAAGGCAATTATTTGAGAACACA
GGGGAACTTCACTTAGCAGACATTGTATTTCACTTGTGGTGTGTTTTGCA
GCATTTAAAAATTGCGGTCAAGACCCGAGCCTTAGCGCAGAGTTTTGTAT
ATTGTTGTAAGAAACATGGCGATGAGGGGGGTCTTTATGCTCCTTATTAG
TATTGGAATAACAAAATTCCGAATTAGAAGGATGGCTTGGGTTGGGACCA
TGGCTATCTAGCATTATTGCGCATTTTGGCGGATTGACTTTAATGCTTTT
ATTAGGATTATTGTTTTGACCCTGCTTGCTGCGCCTTTTTAGAGCACGCT
TAGAGGCGATGGTGCATGCTGTTTTTGAAAAAAGAGAGGGAGA
>oenMel1-28#LTR/ERVL	 
TGTCCTGGGTTGATGTTTTANCTGACTCCTCACCCTGCCCCCCCTTGGCC
ATGAAGCTGTCTGCTCCCGGGGGAGGGGCCGCCTGGGCTCTGCTCTGCGG
ACTGGCCTTAGTTTGCCGCGGGCTTGGCTTAAGGGCTTCGCTTGGGGGGG
GGGGGGGGCTCGGGCGGGGCGCGGCTGCTCGCTTAGCTCTGGCTGCTGCT
GCTAGTAGCTATCGCTGCTGTGGTGGTGGCTCGTAGCCTGGTTTGTTAGT
TAGCTGTTTTTTGCTTAATTTTTTGGCTTTATATTGCTTAAATTATTTAG
TTTAGCTCGCTGCTGTTTAAGGCCTGCTGGCTATTCCGGCTGTTTTGAGT
GAAATATTTTTTTCTTAAGTCCAGTGGGATAAAGAATTGGGGGTTTATTT
CCTGAGAAGCTCTTCTGGAAGTTTTTCCCCCTAAGTTTGTCCAAACTTGG
ACA
>oenMel1-29#LTR/ERVL	 
TTTCTTATTTGGTGGCCCGTACGGGGAAGGAGAAAGTGGAAAAAACTTTA
ATAACATCTTGTTTTTAATTTGCCTGTATTGATATCAGTATGTTTTTTGA
AGCCATGATGTCTTTTAGATTAAAAGCCTGCCTGTATGTTTGCTCTTTAG
AGTTTTTTGAGATCTTAATACCCCTGTGGTCTTTGGGCCTGTTCTCTTAC
TCAGAGATAGCCCCAGTGTTGTCTCTAGCACGTAGTTTTTTCNTGAAAGG
GGTATTAACCAAAATACTCATTGGGCTAGGCTTAGTTGCTATGATCTGCC
AAAAGTTTATGAAGGTGTTAGAATCCACTTCANGGATGTACAGNTCGTGG
TTTGTGTTGTGCACTCAATTCATTAGAGGAGAAGCAAGCAAAGAGGATTT
CTTGCCTTTATTTTCCTTCTTCTCCCCTGAATTATTTACATCTCTGTTAG
AAAATGTTCAGCTCTCCCTGAGTGTAAAGGAAACCATCTTTCTGGTATTT
AATTTAGTAAGTTTTTTCTATACTGTCTGCAGTTTATACAGAATGAAAGC
TGAAATTTCTAGGGATGCAGGTGTTACAACCCCTGATTTGGTAGCAAAGC
AGAGTGGGAAAAATTCTGAGTGGTGTAGCAAATGGGAGGAACTGGGCCAA
ATTCTAAAAGAGTTTTCTGAACCTATAATCTGGGATTTTTCATCTAAACA
AATTCAAGACCCAGTCAAGATTGCAAAGTACTTAAAAGAAAAGTGTCAGG
ACAATTCTAAGGAAAAAAAAAATCACTGCAGTGAGCTGGGCTCTGGCGTA
CGCTTATCGAACCCTGNTAGATAGTGTAGGACAACAAACAAAGNAGAGGG
AACAGGGAGATAACGTAGCTACTATTCCAGTTACTCAGACTGCAGCTGAC
ACCTCAGGCTCCAGGACAGGGGCAAAATTAGACAGCAAGCTTCAACCCTG
GTACCGTGCACACCAATTATGTGGNGGAAGCTTGTGAGGCTTGGACCATC
TGAATATGCCTCAGCTCTTGCAATCATAAAACGAGAAGACATATACAAGA
CAGTGCTTGATATGGCAAAGAAGCTTCGGGCGTACGCTGATGCTGTGCAT
GGCCCAACGCATGCCAGGATTGCAGCCGTAGAAACACGTTTACAGAACTT
GGAGGATAAGTTGGAGGAAAACCATAAGAAGCTGAGAGAAAAAATCAAGG
AGAATCTCCTCCAAATCTCAGCTGTGCAAATCAGACGTCCTGGCAGTCAA
CGCAGACGCTCCTCTGCTGAGGAGAGAAGGTACGCCCCACGTGCAGAGTT
GTGGTTTTTCTTGCGTAACTGCGGAGAAAACATGAGGAGGTGGGATGGAA
AGCCCACAGCTGTTCTGGCACGACGAGTGCGTGATTTGAAGGAAGACAAG
GCTCAACAAAAAGGTTCCATCAGAAAGAAAGCAGCTCCAGTCGCCCGGAA
TCACAGTGCCACGTGTGAGGAGGATAATAACGACATGTCCGATTCACTTG
AAGGAACTTCTAAGACCTATGCCCCCGTCAAAAAGGATAAACAGGCTTAG
GGAGACCCTGCCTCTAGCCAGGGTGAGGCCAGGGAAAACCGAGTGTTTTG
GACCGTGTGGATTCGGTGGCCTGGCACATCGAAACCACAGGAGTATGAAG
CTTTAGTGGACACTAGANCGCAGTGTACTATATTTCCATCAGGATGTGTC
GGAGAAGAGACCGTTTCTATTGCTGGTGTAACAGGTAGATCACAAGACTT
TACCATAGTGGAAGCGAAAGTGAGTCTAACCGGAAGAGAGTGAAAGAGAT
ACCCGATTGTGACTGGCCCAGAGGCCCCGTGTATTTTGAGAATAAATTTC
CTTCGAAGCGGGTATTTTAAGGACCCAAAAAGCTTCAAGTGGGCATTTGG
GATAGCGGCTGTAATGGCGGAGAAAATCCGGCAATTGAACACCCTGCCCG
GACTATGTGAGAATCCAATTGCCGTGGGACTCCTGAGGGTAGAGGAGCAG
AGGGTACCGATTGCCACTTCAATAGTACATCGCCGGCAATATAAGACAAC
TCGAAATGCTGTGATCCCGATCCATAAGATGATCCGGGAGCTGGAGCGCC
AAGAGGTGGTAAGCAAAACCCACTCACCCTTCAACAGCCCCATCTGGCCT
GTGCGCAAGTCTGACGAAGAATGGAGATTGACAGTGGACTACCGCGCATT
GAATAAAGTCACCCCACCGTTGAGCGCTGCCGTGCCGAACATGCTGGAGC
TCCAGTACGAGCTGGAGTCCAAGGCAGCAAGGTGGTATGCCACCATTGAC
ATTGCCAATGCGTTTTTCTCCATTCCTTTGGCAGCAGAGTGCAGGCCGCA
GTTTGCTTTCACCTAGAGGGGCGTGCAGTACACCTAAAACCGACTGCCCC
AGGGGTGGAAGCACAGTCCCACCATCTGCCNTGGGCTGATCCAGGCTGCA
CTGGAAAAGGGTAAGGCTCCAAAACATTTGCAGTACATCAATGACATCAT
TGTGTGGGGAAACACAGCAAAAGAAGTGTTTGAAAAAGGAGAGGAAATTA
TCCGAATTCTCCTGGAAGCCGGTTTTGCCATCAAAAAAAATAAAGTTAAG
GGACCTGCTCGTGAGATCCAGTTCCTAAGAGTGAANTGGCAAGATGGAAG
ACGTCAAATTCCTACTAATGTTATTAATAAAATCACAGCTATGTCTCCAC
CTACTAACAAAAAGAAGACACAAGCTTTCTTGAGTGCTATAGGCTTTTAA
AAAATGCACNTCCCCAAGTACAGTCAAATTGTGAGCCCTCTTTACCAAGT
TACTCGGAAGAAGAATAATTTTCATTGGGGCCCAGAACAGCAACAAGCCT
TCATCCAGATTAAACAAGAGATCGCCCATGCAGTAGCTCTTGGCCCCGTC
AGGACGGGGCCAGATGTGAAAAATGTGCTCTACTCTGCAGCTGGAAACCA
CGGTCTGTCTTGGAGTCTGTGGCAAAAAGTGTCAGGTAAGACCCGAGGCC
GACCCCTGGGATTCTAGAGNAAAAGTTACAAAGGGTCTGAAAGTAATTAT
ACCCCGACAAAAAAGGAAATCCTGGCTGCTTATGAGGGAGTCCAAGCTGC
TTCAAAGGTAATTGGCACAAAAGCACAACTCTTTCTGGCACCCCGGTTGC
CAGTGCTGGGGTGGATGTTCAGTGGGAAGGTTCCCTCCACCCACCATGCC
ACCAGTGCCACATGGAGCAAGTNGATAGCCCTCATTACGCAGCGCGCCCG
GATCGGGAAATTAAATCGCCCAGGGATCTTAAAAATAATTACCAACTGGC
CAGAGGGAGAAAGTTTTAGTGTAACAAACGAGGAACAAGAACCGGTGACC
CGGGCTGAAGAAGCACCACCTTACAACCAGCTACCGGCAGAGGAAATCCG
TTATGCCCTGTTCACCGACAGTTNCTGTCGCATTGTAGAGACAAATCGAA
AATAGAAAGCAGCTGTATAAAGCCCTACACGACGGGTTGCAAAAGCTACT
AAAGGAAAAGGAGGGTCTAGTCAATTCGCTGAACTCAAAGCTGTCCAACT
GGCTTTGAATATTGCCGAAAGAAAAAGGTGGCCAAAGCTCTATCTTTACA
CTAATTCCTGAATGNTAGCCAACGCTTTGTGGGGATGGCTGCAAAGATAA
AAAGAGACGAACTGGCAGCGCAAAGGAAGACCAATCTGAGCTGCAAAAGA
GTAGGAAAAACATAGCTACTCGGTTAGACAAGCTACCCGTAAAGGTTCGC
CATGTAGACGCCCATGTCCCCAAAAGTAAAGCTAACGAAAAACAGCGAAA
TAACCATCAAGTAAATCAAGCAGCAAAAATAGGGGGGTTAGAAATAGATT
TAAATTAAAAACATAAGGGAAAGTTGTTCCTGGCTCAATGGGCCCATGAT
GCCTCAGGCCATCAGGGGAGGGATGCCACCTATAAGTGGGCACAAGACCG
AGGAGTAAATCTTACCATAAACAGCATTACTCAAGTTATTCATAATTGTG
ACACTTGCGCTGCCATCAAGCAGGCCAAGCGAGTGAAGCCCCTCTGGTAT
AAAGGACGGTGGTCCAAGTACAAGTATAGGGAGGTTTGGCAAATTAATTA
CATCGCACTGCCTCAGACCCGCCAGGGCAAACGTTATGTGCTGACCATAG
TAGAAGCCACCACCGAATAGTTAAAGACTTACCCTGTATCTCACGCCACT
GCCCGCAACACCATCCTGGGCCTGGAAAAACAGGTCCTTTGAAGGCATGG
TACTCCTGAAAAAATCGAGTCAAACAATGGGACTCATTTTAAAAATAACC
TTGTCAACACCTNGGCTAGGGAACACGGTATTGAGTGGGTGTACCACATC
CCTTACCATGCACCAGCTGCAGNTAAAGTAAAAAAGTACAATAAATTGTT
AAAGACCACCTTAAAGGCATTGGGTGGGGGATCCTTTAAAAATTGGGAGC
AGCATTTGGCAAAGGCCACTTGGTTAGTCAACACTCGAGGTTCCACCAAC
CGAGCAGGTCCTGCCCAATCTGAGTGCCTTAATACAGTAGATGGAGACAA
AGTCCCAGCGGCCCATGTCAGAGGATTGCTAGGGAAGACAGTATGGATTA
ATCCTGCCTCGAGTACAGGCAAACCCATTCGAGGGATTGCCTTTGCTCAA
GGACCTGGATGTACTTGGTGGATAATGCAAAAAAATGGAACAACCCGCTG
TGTACCTCAAAGAGATCTGACTGTGGGATAAAACAAAAGGAATATGTAAA
TGTTAAAGGTTTGAGCAAGTCAGAAAAAGTGTTCATATTGTGTTTAATAA
GTGTATATCCCAATCGTGNGTCAATGATCACGATATGGAATAAGGGGTGG
AA
>oenMel1-2#LTR/ERVK	 
GTTGGCGCCCAANCGTGGGGCTCTCAGTTTTAGACCCCATTTGGCTAAGG
TGCCTGTTTTAGGACTTTAAAGGCCCGTTGAGCTGTTCAACTACCTCTGT
GGGTCGGAGCTGCTTTTTGCCAGCCCCGAACATAGGAGGGTGAATCGGAT
AACTTCTCCGCGAACTCGGAGGAGCCGGTTCTGGATTGGAGCTTTTGCAG
AGTTACGGCGAGACCGCACTCCGTCTGAGGAAGGTAAAATATCCCTTCGG
GGAGGCGGGAACCCCTATCTAGCCCCGAGGTACTGGGGAGGGGGGAGTTT
TTAGACGGAGTAGCCCCAAATTCGCGGGGGGAGGTTTGTATCCCGCGGGG
GCAGCGGCGGCAGTCCCGCGTGGAGCGGCGAACACGTGGGCGGTGTTGCG
CAACCCCGCCGGCATTTACGTGCTCGGCCGCTCCACCGGCGTGTGCTGCG
CTATTGGCGTGAGCACGGGCGCGGGGANTTCCCTTAGGAGGANTTCCCCG
GGACCGCCCGGTGCTGCCGTAGCGACAGCCGCGTGTGGTAACAAAGCCCA
GTACCCCCACACCTGGGTTTGCAACGGACTGCTAATTTGTAACTTTCTGC
AACAGTAAGGGAATCGTGCATTTGTGTTTATAACATCGGAATGGGGGGGA
AATTTTCTGCACAACAAAAGAGCATTATTTCTCAGCTTAAAGAAATGTTA
GATGCGCAGGATTTTGTAATTTCTAAAAAACAGATTAAGAAATTTGTTAG
TTTGTTGTCTCGAGAAGTTATAGAATTTGAAAAGCAAGATGTCACTTCAG
TTTTATTTTGGGACAATGTTGGAAATTTATTAACTTCTAAAATACAGAAA
GGCGATACCACGGCTGCTTTATTTTTGCCTATATTTCTAAATATTCACCA
ACACTTAACGCAATTAGATTCGGAATCTTCTGTCCCTGAATTAAAATCCT
CTTTGCCTAATTCGGAATCTTCTGTCCCTGAATTAAAAGAGAAATCAGAA
ATACCTCAAGAAACTACTAATTCTAACAATCCCCCCAGTTATACAATGTT
GCCGCCTGAAAATTCTAATTTAGAAAATCACCTTTCTTCAGTGCAAGGGG
GAAAACCTGTACTAACTTCNAACCATATGCCTTTTTCTTCCAATAACCCA
TTCCTGCATCCAACTCCCATTTCTGCTCCATATCTTCCCAGCTATGTAAA
CCCATATTTCCAAGCTGCTGTTTCTATATCGCCTTGTAACTATCTTTCTA
ACACGGGGACAGAAAACAATAGGAGCTCCGTGAGGGCTGAGACGGGGGGA
GGGGCAGCACGTGTTTCAGGAACGCAGGCAGAGACACAGAACCACTTAAC
CCCTAACTTGCTGACTAACCCTCCTCAGCTCTTTGATGCAGCTCCGGTTA
GTTATGTGGGTAGAAGGAATGGTAGAAGAAGCTACGAGCCATTCTCATAC
CAAGATAAAAAGGAAATTTGTAAGGTGCAAAGGGAATTTGGGAGGCAAAG
TGAAATATTTAAAGGGATGCTAAGAACAACTCTTTTGTCTAATGAATTAG
TTCCCCAGGATATAAAGGACCTTTTTATGTGTTTGCTAACTCCAGCTGAA
TATGAATTATGGCTTAATATTTGGAAACGTTCTTTAAGCAGTCTTTTAAC
AGAGCTTCACAAAAACCCTGAGCATTCCAAAGATTCTGATGATAATGAAA
TTACATTGGATCATTTATGTGGGGAGGGCGAAATTCACTGCCCTGAAAAA
CAAATTCGGTTATTATCTAAATTTATTTTGAATAAGGTTAGTGATGCAGC
TGAAAAGGCCTTTATCAGTTTGCCAACACCTGAAGTAACTACTAGTTATG
TTCATATTAAACAGCATTCTTCTGAGAGTTTTTTAAGTTTTATAGATCGA
TTAAAGACACAGGTGGAACGCCAGGTGCAAAATCCAGCCATGCATGCAGA
ACTGATTAAGGAATTAGCAGAGAAGAACGCCAATCAAGCATGTCGCAGAG
TCATCTCGAGCTTACCACTCTACCCGGAGCCCAGCCTAGCACAGATGATC
GAAGCATGCACACGCAAAGCAGAACTGTTCAGTGATCCTGAGAGGAACCC
GAGTCCAGCACCTCCTAAGCCTCCAGCACCTCAACCACCACAGATGAAGA
AGCAGCACATGTCATCACAGCAGCTAAAGAAGATCACCTGTTTCCAGTGT
CAGCAGGAAGGACATTTTGCTAGGGACTGTCCTCAGAACAGGAAACAGAA
GAAAATCAGTGAACCAAAAAACTAGAACTGAGGCGCTGGCCTGCCATAAA
CACCATAGAGCGCCAGGATATAAATTCTGCAGGCTATACTGTAGCAAAAG
CCTCTCTCTTAAAAACAAAGGGGGAGGGTGGAAGGGACAATGTGGGGATA
ACAGATGATATAAATGTTAAATGTTCTCTTAACCAGGTCAGGCAGTCCTG
TGGCCGTGTNAGGCTCCAGACTACCAAAGGTTTTCATTTCAGATCTGCTG
AGTGGACCATCATTACAGTGGACATCTCAAGCCCCTTAATTGACATGACG
GTTTGCCACATGGAGAGTGAGTATTTTGTTGTGGGAGACACNGCACACAC
ACCTTTAGAAATTGAAATAGCTCCTATGATCATGAAGGGGAAAATATCCA
GTGTTATAATATTAGCCCGTTGCTCTCAAGCACCTTTCTATTTGTGTGAG
GGGCAAGTACTGGCCCAAGCCTTTCCTATTCCAGCAGACATCACAGCAGA
TGATAAGTCACCAGAGGTTTACTGGGCAGAAACAGTAAAGGAGGAAAAAC
CTTCTCTAGCATGCAACATGACACATGGANCAGATCACCTACACGTGCAG
GGTGTTCTGGACACGGGATCAGACGTGACCATTATTCCTGAAAAACTTTG
GCCTTCACATTGGGAATTGCAACCTGTGGCTGGGCAGCTCCAGGGTATAG
GAGGAGTTAAATTGGCAAAAATATCAAAACGCATGGTACAAATTGAGGGA
CCGGACGGCAAATTGGCCAGTGTTCGTCCGTTTGTAATNGATTACAAATG
TCCCTTGTGGGGGAGGGACTCCATGTCACAGTGGGGAGTTAAAATGATAA
TTCCAAAAACCCCTCAGGATTTTTGGAAGCGGCCACTGTNGACTGCCAGG
TCCAGAAACTAACATGGCTAAGTGACACACCTATCTGGACAACACAGTGG
CCGCTGAAAAAGGAAAAGTTACTGGCACTTGAAAAACTTGTAGAGGAACA
ATTGGCGAAAAATCATATAGAAGAAACACTTAGTCCCTGGAATTCTCCAA
TCTTTGTAGTGAAAAAACCAGGGAAAGACAAATGGAGATTGTTGCATGAC
CTTAGGGAAATAAATAAAGTAATTCAGGACATGGGGTCTCCTCAACTTGG
GATGCCTAGTCCTAGCATGTTACCTAGAGACTGGCAATTGGCAGTTTTAG
ACATCAAAGATTGCTTTTTCCAAATCCCATTACACCCTGAAGATGCTCCC
AGGTTTGCATTCTCAGTACCATCATTGAACAGAGAGGCTCCAATGAAGAG
ATACCACTGGAAAGTGCTTCCACAGGGCATGAAGTGTAGTCCTGCTATCT
GTCAGTGGTATGTAGCTTCATTGTTGTCTCCTGTGCGTGCACAAAGCAGG
GAAGCTATAATCCTACACTACATGGATGATGTGCTGGTGTGTGCTCCTGA
CAATTCCATACTCCAACACACGCTTGACCTAGTAGTTAAAGTTTTAACCT
CTGCTGGATTTCAATTACAGGAAGACAAGGTTCAAAGGATGCCACCTTGG
AAATATTTGGGCCTACAGATTACAGCCAGGACCATTGTTCCACAGAAATT
ACAAATTAATTGTAACCCTAAAACTCTTGCAGATCTTCACTCTCTGTGTG
GGTCGTTGAACTGGGTAAGACCTTGGTTAGGCCTCACTAATGAGGACTTA
CAACCCCTTTTTAATTTATTGAAAGGGGAGAGGGAGCTACTGTCTCCCAG
AGAGCTGACACCTGAGGCAAAAGCTGCAATTGAAAAGGTACAGCAAGCCC
TGTCTGAAAGGCAGGCTCACCGCTACCAGCCTGAACTACCTTTCAAATTC
ATTGTTTTGGGGAAACTGCCACACTTACATGGGTTAATATTTCAGTGGAT
TGAGGGGCAGAGGGACTCACTCTTAATCATAGAATGGGTCTTCCTCTCCC
ACCAAAGATCCAAAACTATCACACAACCACAGGAGCTTATGGCTCAGTTG
ATTCAAAAAGCAAGAATGAGGCTGCGTGAACTGTCTGGGTCTGACTTCAC
ATGCATTCACCTGCCAATTAAACTTTCTATGGAGGGAAAAAACTCTCCTG
AAAGGCTAACAAAAGAAATGTTTGAGCATTTGTTACAGAGCAATGCCAGC
CTCCAGATATCTCTGGATAGCTACACTGGACAGATATCTGTTCACAGCCC
AGCTCATAAGTTGTTTAATGAGGAATTCCACCTCATCCCTCGTGAAAAGA
GAAGCAGGAGACCGCTTCAGGCACTCACAGTGTTCACAGATGCATCGGGG
GCCTCCCATAAGTCGGTGATGACTTGGAGAAATCCTCAGACTCAGCATTG
GGAAGCTGATGTTAAGTTTGTGGAGGGGTCACCCCAGATTGCAGAACTGG
CTGCAGCTGTGAGAGCCTTTGAGCAGTTTTCAGAGCCTTTCAACCTGGTA
ACAGATTCAGCTTATGTTGCTGGGGTAGTATCCAGGGCGGAGCAGGCAGT
GCTCAATGTTGGGGATCCCTAAGGAAATAAAAACAGATAATGGACCAGCA
TACACATCCAAGGAGTTCCTGGAATTTGTCCAGCAGTGGGGACTGGGACA
TAAAACAGGCATCCCCCACTCCCCTACAGGCCAAGCAGTGGTTGAACGCA
CACACCAGACACTCAAACAGGTTCTAGCTAGGCAAAGCAGTTCAACTGTG
TGGATGTCTCCCCAGCAAAAGCTCTGTAAAGCTCTGTTCACAATCAATTT
CTTGAATTGTTCGTTTGAAACCATGACACCTCCTGTGGTCCGTCATTTTA
ACAGCAGTAAACAGTTTAAATTGTCTCAGCATCCACCTGTTTTGATTAGG
GATCCAGAAACATGGGAAACCAGGGGTCCCTATGAGCTAGTAACCTGGGG
AAGGGGCTATGCATGTGTGTCAACCCCCTCAGGCCCTCGATGGATTCCCC
AAAAGTGGGTTAAACCTTTTGTTCCCAAAACTCCAGCCACAGCAGAAGGA
GATGAGAAGCAAGTAACCACTGCTTCGAAAAGAAGACGCCGCAGAGGGAA
AGGAAACAAAAACCTCATAAAGGAATACCCTCTGGCAGAAAAGGACTTAT
AACATGTTTTAAACTGTTTGTTTTTCCTTTTAGAAGAAAGCTACCCTCCA
GTTAACCCTGTGTCCTGTTAGCTTTGAACAGTTTGGCAGCNGCGTGGATC
ATCCCTCAGAAAACATATGCCTGTCCACTGCAGCAGCAACAGACCCTGTG
TCCACCTGCCTGGGATGCCAGGGATTTGAAGGACTTTGCTGCATGAACCT
GACTGCAAGAGCTCCTAAATGTCCACGCTGCTCTGCAAGAAACAAAGGAC
TGGCTTAATGAACTGTTCAAGGGCTGGGGGTTTTCTGGGTGGTGGACTTC
CACAGTCAAAACCATTATGTTATTTGTTGTTAATTCTTTCCCTTGTAGCG
ATAGCATTTGGTATCCTACGTCATTTAATATTTAAAGCCATTAATGGTAT
AATTTCTTCTACCTCAGCAGGCAATCATATAGAGATGGCAAATATAAAAC
AATCTAACTCTCCTGCTTATCACAAATGGTGGGCAAAATAATAAATTCGG
ACTAGAATTAGTTTAATATCATCCCCCTACTTAAAAAACAAAAAAACGGG
GA
>oenMel1-30#LTR/ERV1	 
TGATGCCTTAAGNTCGGAGTTTTCTGTTCTGCTTGGGTATGCTTTCCGTT
GNGCCTTAGGGTGGTGAAGGCGAAACAGTCCGACNCNAGCTATNGACTCA
AGGACAGTTTCTTCAGACTCCAGGCCCNAAGTATTAAATACCTATTTATT
TCCCCTAACTCTGTGTGATCTCTGTTCCAGCTCCTAAAGGCAACA
>oenMel1-31#LTR/ERV1	 
GTTTTTGGCGAGCCAGCCAGGAGAGAAGGCATCTGGAAAAATCCCTGGAC
TGAAGCCGGCAGCTCTGGAAAGGCCCAGTGGAGGTCCAGAGATATCAGAG
CCAAGAACCCTGGGAACAGAGATGTGTGAGTGACGGAATAAAAGGTATTC
TGTTAGTTTAGCATCTGGGTTATGTGCTAATAGGGTTTGTAATTTGTAAT
TTTTGAAGTGTGAATTTGTTTTGGAGAACCTCAGCACAACAATTCTGCTC
TTTATCTGTAAGAAGGACCACCTTCATAAAGAGCAGGTTTGAATTGCAGT
GCTCTTGGCTTGAAGCCAAAGAGTGGTGCAGTTAACTAATGTCTGTGCTG
TGGCTCAGAGGGTCATGGTTTCAAATCCCGACTGTTTTGTGCTTTGCTCT
ATATTTCAGGATATCAGAATGGGTTGCACATCCTCTTCTGAATCTGATAA
TAATAGTATTCCAAGAGATAGCCCTTTGGGGCTAATATTGAAAAGCTGGG
CAAATCTGATTGGAGAGGATTCTGAGCTTTCAAAACCTAAACTTATTAGA
CTCTCGGAAAAAATTTGGCCAGTGTATGAATTAGATAATGGGGAAACCTG
GCCTAAGTTTGGAAGTTTAAATCGAAAATTAATATCAAGTTTAATATCCC
AACTACGTAGAGAGAAATTTTTTGAACAGCTAAAATATGCCCGGCTTTTC
CTGATATCAGCATGTAAGCTGGACCGGGAAAAGGAGAAAAAGCATATATT
AGTCTTAAAGGGTAAAAAGAAGGAGCCAACTTTCAGTAGTTTATGTAAAA
ATCCAGAGGAAACGGAGAAAGCAGATTTGGACCTGGTTGCGCCTGCCATG
AAAGCAGAATCGGTCCCAGCTGCGCTGGGCACGGGCTCGGACCGGGGCAC
GGCCCCTCCTCCCGCAGCCCCGCAGAGGGGGGAAAGGTGGGGCGCGGCTC
AGGCAGGGCCCCGGTCAGTGAAGAAGGAGGAAGGCGGGCCCTGGCAGCCA
TGCACACTACCTGCGCTGCCGTCCCCGGCACCGCCCAGGGGGGTCGAGAA
AAAGGAAAGAGATAACCAGTGTGTGCAGCCTTCGGTGCCGCCCCGAGAGG
AGGGGCCGGGGGACAAGACCTTTTACGAAGAAGGCGGAGAGGGAACCGCC
CATAGGAGAGGTGGCACCTCCTCTGCTCTTAGGCTTGATAGCTACCATGG
CAACCCCGAAGGACAGGGCGCGGCCCCTCCTCCCGCAGCCCCGCAAAAGG
GAAAAAGGATGGGGAGCACGGGAAGCGGGGTGACAACACGGCGTGAAATG
GAAGCGGCTGCAGCACGAACTCTGGGACTTAATCCCCAATATGTAATTAA
ATAATTCTACTTTATATTTAAATTTAGAACTATAATATATGGCTAGATTT
CTTGGTTAAAGAATACCTGTCAAATATTGTTTACTGTTCTTGCATAAGTT
GCTGCCCTGCCATAATCTGTAGGTATCACTGTGAAATTTGCCAATTTCTG
AAAGACTTTATTGTGAGTTCTAACTTACTGAAGTGGCGCAAAGGCCACTG
GTACACGAACGACAGTGAGCCTCTATTAGAGCTGTTGTGCTACTTTCACT
CACCCAGGCAGACTAAATTAGTTACAGTGAAGCTGTCCTGTGCTATGGGG
TGTTGATCTGCCTCCCCTCCTCTCCTGGTAGCAATCTGGCAAGAGGGGTA
CGAAAAGGGTCAGAGCCAGAGCTCAGAGCAGCAGCGCTGGACCAGCACTG
GAACAAAATGAGCCTAAGAGGGAATGCACCGAAACTCAGGGTTTGTGGGG
TACTGTCAGTTCTCCCCCTGATCTGTCAAATAGAGCAACACTGCAGACTC
AGGCATGAGGTATTTATGCGCAGAAACTTTATGAGAGTAAACATAGTGGA
CGTGTCTCATCTCATCAGATAAACATAAATCCTGCAGTTTGTAAGATGTT
TCTGTGCTGTAGATGTGGATGTATGTTTGAGGTGAGCACCTAAATCTGCT
GGTGTTTGCAGTAGCTCTGGGTCCCATCTGAGGTGCTGTCTGGTGGAAGC
TGTCTGTCTCACGAGCAGGTCCCAGGGGAGACACCTCCGCTGCAGATGCA
GCTTGGGGAAAGCAGAGCATTGGATATTTATTAGAACATATCTTCTGCAT
CTCAATTACCCATTGGGAATCACCCATTTCAGGTGACTCCTTTTATGTGC
CTGGAATGAAAAGATTAAATACCAAATTTTCTAAGTTTGTAGTTGCCCGG
TGCAGCAAACTGGGATGCAGAAGTCAAAAAGAAAAGATATTTTGATAAAC
ATCTAATGCTTTCCTGATATATTAACTACTTCAGAGTTAAGAAAAGCTTT
GCTCCTGAACAATTTTTGACAACAAAGATAAATGTAAATGATGGCGTATT
TTGGGTGATTCCTTGTCTTTGTTTCTTTTCTATGTTTAATTGCTGTTCTT
CTTTATATAATATTTGATTATGCAAAATATTGTTCTTGCTAAATTGTTTC
CTGTTATTAAGTTTATGTTTCTAGTATGTATTTGTTATTAGATATTTGTC
TAATGTTAGATATTTATATTATTATTGTTAGACATTGACTAGTTATAAAG
TTTCTTTTGTTGATAAGTTTAGAATAGAGACTTGACAAGGTAGTAGAGGC
CTTGTCAAGCCTCTAAAGGGGAGAAA
>oenMel1-31#LTR/ERVL	 
AGGAAGAAGGAGGAAGGGGACGTTCGGAGTGATGGCGTTTGTCTTCCCAA
GTCACCGTTACGGCTTGGTTGCCGGCTGGGGTTAAAC
>oenMel1-32#LINE/CR1	 
TTTCTTGTAGTTTTTGGGACTAATCTTCTTTAATACGTAATTAGGAGGTG
CCTGGAATTTTTTTATTGATTAATATTCGGCTGCATAAATTATTTTATTT
TCTTTCCTTGCTCGGGCTTAATATCACGTGATACGTNTTCTGAAAACGAN
GCCAGGCACATGANAATATTTTCAAAATCCTAGAATCTCCGTTTCAAACC
GATAAGTGCAACTTGATTTACCCCTCTTTAAAATTTGCTCANGTAGCAGA
TATCTCTTGGCATGTGTTTTATGTAGGACGTGACAATATTAAGTNCAGGA
TCAGCGATTATGGTTCGGATGTTTGCTTCCTTTGCAAAGTGGGGGAGGAG
NANAAACTCATATCTTTTTCAGNAACTTTTTATAAAAGTTNCATGGAAAC
AACTTATGTTGTTACCATNGTTGGAGATATTCAAAANCCGTCTGGACACG
GTCCTGNGCAATCTGCTCTAGATGACCCTGCTTGAGCAGGGGTTGGACCA
GATGACCTCCAGAGGTCCCTTCCAACCTNANCCATTCTGTGATTCTGTGA
TNCTTGGCTTGAGGGAAGGATAAGCAGGACTGCTGTCTCTGCTGCTCCTT
AATTTATGACTTGTGCAACATCTCTCTGGTTACATCAGATATGCTTTACA
TTATAAGCTCCCGATGGGCGGTGTGGTGAAAAAATATTTTGGTTTTAATT
CACAATATTTAATATAATTTTAATATCAAAACAGTCATGCTGAAGCAAGT
GTGTTTAGAGCACTTATGGACTTGCTACCNCTTTTCTCTGGAGGTGAATG
NAAGGNTTTGGGGTTTNCCTTCCNAACTTTCTGNGCTGAGAGCCAGGAGT
GCAATTGATTCTGACAGAGCCTGGNGTCNGAACTTGGTGGAGAATCTCGT
GTAAGTAATTTGTGTTCTGAGTGGACATGTGATGCCAAGCAGGGTAAACC
CATCAGTCTCTATACCTGAGGCTTTTGTGATCCCTCCATATNTTTNGCCG
TGGGACAAATGGTTGATGCATCTCTTAGCGAAAGTCTTACAAAAAAACTT
ATAAAATCATGTCATGTCCCTGAAGCTCAAAATAAAACNAGAAAAAAAAA
AACTCCCACATCATTGTCAATGAAGTGCAGAAGTTTGCAGTAGAGTGCCC
AAGCCNTAACAATAGTATCAATCCCTAGTTCAAAGAAGTGATATAAATCC
TAGTAGGAACTTGTCAGCCAAAACATCAATGGCTTTATATGAAGCTGGGG
AAGGTAAGTTTGCACATTGCCTTGGGGAATGTAAGGATCATCTGTGTCTG
AATGAGAGAAAAATCTCTTGCTGAAAATGTGTTGTGACTGTCCCTGTTAG
TCATTTANAGAGTCGAGTCAGAAATCCTACCATGCTGGCCTAGAACAGAT
GGACTTCCTGCATGCTTGGGAGGATGCCAGGAAACAAATCAATGGCTGGG
TGGAGGAGAGGACTGAAGGTGAGTGCTTTGCCAAGTGCCCAGTTGTGTTA
AATGGCAGCCATGGTTTGGGTAAGCACCTACTTCAGGATGTAGGACTGTG
AATTCACNCCACTGAAATCTAGAGCTGTTGCTGTGTGTGGTNCATCATTC
TCTTCTCTATTGTTTATTAATTGCAGAGTACATAATATA
>oenMel1-32#LTR/ERV1	 
TGAAACAGGGGATTTACTTCATCGTTTTCTGCCCACAGACTCATTTGAAG
ACCACCGACTCAATAAACTACGCAGCCGCAATGAATATGCAGCTAATTTC
CATACGAAGCGGGGAAACAGGCGGGGCAGATAATCAATATGTATAGGCGA
TTTAGAATATGCATGTACTTCCTAGATAAATAGAAGGTTAGAAGCATGTA
AGGTACGCAGGATTTGGGAGGATGCTCTCCCCCTGCGTCCAGCGCTGAAT
AAAATACGTACCTACTCCACAACTTTACGGGTTGTGAAGTCTATTTTCCG
CGCTTCA
>oenMel1-33#LTR/ERV1	 
TTTGGCACCCCAGATGGGACCTTCCTGTCTGTCTGCAGGANTGAGCTGAG
GGCCGGACGACTCCACGGCGCACCCCGGGATTTCCTGGAGGAGACCCCGA
CCCCGGCTCGCTTACTGCAGCGACAGAAAGGACCACTGGCTGGCGGATGA
AACGGTACGTATTAATTCTGGGGGGTTTGTAAGACATATGCACGCGTGAT
TGGAGGGCTGTTGATAAATCGCAGGAGACGTCCTGCGTACAACAAAGTCC
CTGGGTAGGTCGGGCTTGCAAGCAGCGGGCCGGTGGAGTTACCGGCGAAG
GGATACGAACACCGGTGGGGCCGCTCCGTTCCCTTGTCGAGAAGGGAGGA
GGGGGGCCGGTGAAGGAATTCGCTGACTGATAGAGCAGCCGCGGAGCGAC
CCTCGATCGCGGGTCGAGTGAATTCCTGCTCCCGTATCATCGGAGCTGAG
GTGGTGTGTGTGTTGGAGTCCGGACATTGCGAGCAAAGTGAGTGAATGAG
TGAGTGAGACGTACCCAGGAGGGGAGTAAGTGTGGGGTATTTGCTTCAGA
AAGGCAGAATTGTTGTGTATTGTGCGGTGTGATGCGAACGGGACTGTAGC
TGTGCTGAGAATATAATGATTGTTAGTAAAACGTATGAATAATAAGTGTG
CTGTGTTCGTACAAGAGCGAGTGTGCTGCGTCGGTACATTGTGTGCTTTG
TTTGTGTACCGAGACGAGTGAAAAGGGGTCCCCTTTCCAACGGTTTGGGC
GTGATCCTTGGGATTTGTGAACCTAATAGACAGCCAGATAGAGAAAGGAA
ACAAATTGACTGATCCAGCAGTTGGTATTGTGTGTGTGAAGGGGATTGGA
AGGAAATTCTAAAGTTCAGTAAGGAAAAGTTTAGGTGTAAAGTAGGCAGG
GGACGAAAAGAGAAGAATGGGATCTACACGGAGCACAGAAGTCCCTAAAG
CCAGCCCTTTAGGGTGCATTATAACACACTGGAAAGAAGTTGCAGGAACT
GGCGGCACTGAAAATAAATCCACTCTAATTAAATATTGTAGCCATTGGTG
GCCACTTTATAGACTAGACCACGGAGTAAGGTGGCCACCCACTGGGACTT
TAGATTACGAGACTCTGCTGCAACTAATGCTGTTTTTAAGAAGAGAGGGC
AAATGGACTGAGGTCTCCTACTGTGATATGTTCTTCTCTCTCCGAAACCA
CCCTGAATGGCAGAGAGACTGTGGGATTAAGGCACCCTCTGACCCTTTAG
TTTTAGCCCTTGAGAAGGAAAGGAAAGCAAATAAAGGGAAACTTAAAAGG
TGTTGTTCAGCATGTGATATAGGTGAGCGGTGTACCAGATTAGACAAAAT
GCACAATTTGGATATGCAGGAACAGGATATGAGTGACCTATTCAAATCTC
CTCCTCAAACTCGGGGACAGAGAGATGATGATTCAGAAGGAATACGTACT
CCAGCCCATTCTCCTCCCAGAAGCCCTGTGTCTTCTAGGACGAGAAATAA
GGTGCTACAACTCCCTGAGAGAAGAAAGAGGAGGACAAAATCGTGGGCAG
GGTCGACGAGGGGGACAGGGGGGCCCACCTCGATTGGGTAAAGATCAGTG
CGCGTTTTGTAAAGAGTTGGGGCACTGGAAGAATGAATGCCCTAAACGAA
GGAGGGACAAGGAAAAAGACGTGATCGCATATGCAAAAGGAAACTGAAGG
GGACCGGGAGATCGACCCCCAGCAGATCCCCTGGTTATAACAATGGAGCT
GGGGGAGGAGGGAAAGGAAGTAGAGTTTGTAATTGATACAGGAGCGACAT
ATTCAGTATTGAATAAGGCCCTGGTGCCTGTGGGAAAAGATTATGTTACG
GTACAAGGAGCTACTGGCCAGTCTGAAAAGGCTTATTTTTGTAGACCTTT
AAAATATAAATTTGGGAAACAATGGGGCACTCATAAGTTTTTATACATGC
CAAATTCCCCAAAGGCGCTCCTGGGAAGAGACTTATTGGAACAATTACAA
GTGACCATTGTATTTAAGGATGGGGAGATTACTTTGGAGGTAAATGATCA
AAAATATATAGAAGTGTTGAGCTTAATATTGACAATCATTGAAATTGAAG
AAGAAATTAGAGAAGAAATAATTAGTCAGGTGTTCCCCGGAGTATGGGCT
TCCAATGTGCCAGGGAGAGCGAAAAATGCACCTCCTATAATAATTAAACT
CAAAGAAGGGAAACAACCAGTTAGGATCAAGCAGTATCCTTTGAGAAAAG
AGGACAGGGAAGGAATTAGGCCAGTGATTGAGAACTTTTTACAATTAGGA
TTACTAAAAGAATGCCAATCTGAGTTTAATACTCCTATTTTACCCGTTCA
GAAACCTGATGGTTCATACCGGGTGGTGCAAGATTTGCGGGCTGTTAATA
AGATAACTGAAGATCTTTATCCAGTAGTGGCAAACCCATATACTTTATTA
ACATGCTTAACACCAGAGTTTACTTGGTTTACTGTTTTAGACCTGAAAGA
TGCCTTCTTTTGCCTCCCTCTCCATGAAGCCAGTCAGAAAATTTTTGCAT
TTGAATGGGAAAATCCTAGAACTGGACGGAGAACTCAACTCACATGGACA
GTACTTCCCCAAGGGTTTAAAAATTCTCCTACTTTGTTTGGGGAGCAGCT
TGCCAAGGACTTAGAGGCCTGGGAGGCCCCCCCAGAAGAAGGAAAGCTGC
TGCAGTACGTAGACGATCTTCTAATAGCCACTAAGACGGAAGAAGCATGT
GTGGCCTGGACGGTGAGTCTCTTAAACTTTTTGGGACTCCAGGGGTATAG
AGTATCAAAGAAAAAGGCTCAGGTGGTGAAGCAGAAGGTTATCTACCTGG
NATATGAAGTTAGTGCTGGACAACGGACCTTAGGGCAACAGCGTAAAGAA
ACAATATGCCAAACTCCACAACCCCAGACAATAAAGGAACTGCGAACCTT
TTTAGGGATGACAGGATGGTGTAGGTTGTGGATCTACAACTATGGGTTGC
TTGTTAAACCTCTGTACACGCTTATGGCAAATGGCAGCAGAGATCTCAAG
TGGACCAAAGAGGCCACTCAAGCNTTTCGTCGATTAAAGNATGCTCTTAT
GTCAGCCCCAGCCCTAGGACTCCCTGATGTAAGTAAACCATTCTTTTTGT
TCTCCCATGAGAAACAGGGGATTGCCCTGGGAATACTAGCACAGAACCTC
GGGCCATACCGAAGGGCAGTTGCTTACTTCTCTAAGCAGCTGGATGCAAC
GGCCAAAGGATGGCCAGGGTGCCTCAGAGCGGTGGCAGCAGTTGTGATGA
ATATTCAAGAGGCACGCAAATTCACCCTGGGCCAGAAAATGACTGTATTG
GTGTCTCACACAGTATCTGCAGTATTGGAGGTAAAAGGGGGGCACTGGCT
TTCCCCACAAAGGTTCTTGAAATACCAAGCTATTATGGTGGAACAAGATG
ATGTGGAAATAGTGGTGACTAATATTGTTAACCCAGCTTCTTTTCTCAGT
GGAAATCAAGGAGAACCAGTACACCACGATTGTTTGGAGACTATCGAAGC
CACCTACTCCAGCCGACCAGACTTGAAAGACACCCCTTTTGACGACGCAG
AAACCTGGTTTACTGATGGAAGCAGCTACGTCATCGGTGGGAAGCGATAT
GCTGGGTATGCAGTTACCACCAGTAAAGAGGTACTAGAATCTGGATCTTT
GCCAACAGATACCTCTGCACAGAAGGCTGAGATAGTTGCCCTGATCCGTG
CCTTGGAAATGGCAAAAGGGAAGAGAATAAATATATATACAGACTCAAGA
TATGCATTTGGGGTTGTGCACGCACATGGAGCTCTCTGGAAAGAAAGAGG
ACTGTTAAATTCACAAGGAAAGAACATAAAACATGCACAAGAAATAATGC
GATTATTAGAAGCAGTCCAGATGCCTGAGAAGGTAGCAATTATGCACATT
AAGGCACACCAGAAGGTGAGCTCAGAAGAAGGAAATGAGCTGGCGGACAG
AGAGGCAAAAGAGGCAGCAAAGGGTGAGATAGCAATTGAGGCAACCTTGA
TTCCAGACGGACAGATATCCCTTGAAGGTAAGCCAATATACGATAAAAAA
GATAAGGAATTAATTGAGGATCAGAAGGGAGCATATAATGAGGAAGGATG
GGCTGTCACTACAGAAGGGAGACTGGTTATCCCCTCCCACATACTATGGC
CCCTAGTTAAAAAGGAACATCAGAAAACACACTGGGGAGCAGATGCTCTA
TATACCCATCTAATTGAAAAGATTACTGCTAGAAATTTATATACTGTTGT
TACCCAGGTTACTCGGCAGTGTGACCTTTGCCTCCAGACTAATCCTAAGA
ATACCCCTAAACCAAAACTTGGTCAAATTGGAAGAGGCCAGGGGCCTGGG
CAGCAGTGGCAAATTGATTTTTCAGAACTTCCAAGAAAAGGGGGGTATAG
GTACTTATTGGTGATGACAGATACCTTTTCAGGGTGGCCAGAAGCCTTCC
CAACTAGAACTGCCAAAGCACGGGAGGTAACTAGAGTGCTGTTACAAGAA
ATAATACCACGCTTTGGAGTTCCAGCCACTATATCCTCAGATAGAGGACC
ACACTTTATTTCAAAGATAGTGCAACAAATTAGTCGTCACTTGGGCATAG
ATTGGGGAACTTCACACCCCATATCATCCTCAGTCCAGTGGCCAAGTAGA
GAAAATGAATCATTTAATTAAACAGCAAATTGTGAGGTTAGGACAAGAAG
TTAATTTGCCCTGGCCCCAATCACTCCCATTGGCATTGATGCGAATTCGA
ACTAAGCCAAGGACTAAAGAAAAGTTAAGTCCTTTTGAAATGCTTTACGG
GAGGCCATATGGAGTGCAAAGGGGAACTTCTACCCAAGTTGGAGAGGAGA
CACTGGCCACCTATATGGTGGCTTTGAGCAAACAGCTCAGAAAAATTGAA
AAACATGTGGCTGGAACTCGGGGCAGAGGTCTGGATGGACCAGTGCATAA
TATACAGCCTGGAGATTATGTATATGTTAAGTCTTTTACAGAAAAAACCC
TCGAACCACAGTGGGAAGGACCATTCCAGGTGCTACTCACTACCTTCACT
GCAATTAAGATCAAGGAACAGAGCGCTTGGATCCACCATTCTCGGGTGAA
GAAAGCTCCAGAAGCTCCTTGGAAAGTAATATCTGGTGATAACGGACTAA
AGCTCAAGTTTAGACGAACAAAATGAGCATATTACAGTTAGGGGTGTTCG
GTGATTCAGGACGTAGAAATTTAATTGTTTTGTTTGTAAATATAATTATA
TTCCAAGAATTGAAAAGTACCTTTAGCCAGAGCAATGTTGAATGGCCTTG
GTCCCAGGCTTTTGTTAAGTCTACCGGATATATGGGGAAGGTACAAAATT
TGAACTTGTCAACTGTAGTCATGCATGGAAACCAGGTATATGAAAAGCAA
GAATGGCAGAAACAAGGGTTGTGGTCACTTCAAGGGACTGTAGGAGAGAC
CATCAGAATAGGATGTCGAATGATTAATGGAACTACCCATGAGAAACCAG
CTCAAATTAGTGTGTCATCTCCCCCTGCAAACGGACATAATGAGATTTGT
AACCAACGCAGTGAGCCAGATTGTTGGTATAATTTTACATTAGATAGGAC
TGTTGAGGTGGTATGCCTTTGGTCTCATAGAGGTCTTGGGCTCTCATTTA
AATTTAGAATAAATGCCATAACCGAACCTGTTCAGATTCAGACTCAGAGT
ACGCCACTCGAACTTAAACTTATGATTTATGAGGTAGGCCCATATATAGT
GAGAAATACAGGACAACAGCAATTATTATTCAACCCAGAATGGTCTCTCA
AGCGTGTTGAATTGCTAATACAAACCAATATTTCAGAGATTCAACCAGCC
TGTTCCTCCTTCCTAAAACCATCCCTAGAAGGGTGGACAACATGGTTACA
GAAGCAAGTACACTTTAGGGATAGGATGCGAAGAGATTTAACGGGAATGT
TTGGAACAGGATTAGGAGTATTGAATGGCATTGACTCTGAAATACTAGCA
AATAAGCTAGCAACTGCAACAAATGATTTGACAAAACTGGGACAACCTCT
ACAATCATCTTTATTGGCATTAGGAAATAGTCAGTGGCAGGTTTCAAAGG
TGTTACCGAACTGGGCAAAGACTGAGGACCAGGACCATAAGTTAATAATA
GACGCACTTAGCACGGTTCAAGATAATGTGTCTTTAGCTTTCAGTTGTGT
ACAAGCGCAGTTATGGATCCAATCCACAGCTGCCTTGGCTATAAGAGAAG
GGAGTGAAGGCACTTTTCCGATTGAGGTCCGAAAAGTTGTTTGGGACAAT
GCTAATGATTTTGAAAGAAAATTCCAATCCTGGTGGACTCTAGTAAATTT
CACCTATGATCCTGTTACTAATATGGCCACTACCTTCGTGCTTACCATAC
GTAATGCCACAGTTTATGATATTCATCCCATCATTGCATTGGGACTCAAT
CATGAGGGGACGGTGTTGTATCCCTCAGAGCATAGGGCGTGGGCCCGGAC
AGTAAATGGGAAATGGCAAACTGTGAATGTAGAATCTTGTGTTACTCGAG
AACAACAAGGGTTTATCTGTGAAAGCAATACAATTGATGCTCAAGACGTA
TGCCTTGACACCGAGCAGGGTGTATGCCACTTTGAAATTCATCCAGATGC
TGATCAAAAGACTATGCTTATATATACTGGTCAAGGATGTGTATGTTTAA
GAACCACTTGTGTTTTTGTGAACATAGACAATGAGAATGTAACTCTGCCT
GTTAAGAATAACTCTAATTTCTGTATTTGTAATTTCGTTAAAATTATGGG
ATGTGATTTTTCATATTCGTCACCAGTTACATCCCACCAGCTGATAAGGT
CTAACTACACGACATACCACAAACTATCACCTACGCCCATTGGAATGAAC
CTTACATTGGTAAAGCAACTGGTAAAACATCAAGACTTAGCAAAAATTTT
GGAAGAAATCAAAGAGAGCGGGCAAAAGACTTTAGTCACTGTTCACCATG
ATGTCCAAGAAATAAATAGAGTCTTACAAAGGGTTAAGCAGGATGCAAGC
CACAATTGGCGGGATGCCCTTTTCGGGTGGTCCCCAACTGCAACTGGAAT
TGTGAATACATTATGTCATCCAGTAATTGTGTTATTGGTTTTAGTTAGTC
TAAGCTTACTGCTGTCTTTTGTACTATTTATTTGGAATTGGAAGATGTTG
CAACGAATGGCAATACTAACTTCATTGTCGAGAGTACATGGTAAGGCATT
AAGAGATACATATCTTAAGGATGGAGAAAGAGAAATCTTGTATTAAGTAA
AAGAATTTACTAATTTTCTAGAAAAGGGGGGAC
>oenMel1-34#LTR/ERVK	 
TGTTGTAACCCAANACCAGGGGTAGAAGGAATGCTNTAACTCTTTCTAGG
NCCCTATNTCATTGGCAGGAAAGCCTCCCTCGGAGTAANTAGCTAGGAGG
GANTTACAGNGTGTTNCAGTT
>oenMel1-35#LTR/ERVK	 
GGCGCCCAACGTGTGCAGCTTGTTTTAATTACTAGCCCACAGGTAGCTGA
ATCCCATTTTCAGGGATTTAATAGGCTCGTTGGTCTGATCAACTACCCTC
CGTGCTTGGCTAGCTGGATTTTAAACAGCTCCCAGGTAGGGAGAGATACG
GCCGATAACTCCTCTCTCAGCGCTGGAGGGAGCCGGCCGTAGAAGATAAA
CATCCTTCACGAATCACAGGAGAAGCCGAGGTCCGTCAGGACAGGTCAGG
TCTACTCCCTGGTAGGAGGCGGGGATCCCAGAGGGAACGGGTTTCCCGGG
CGGAGACGGTCGCGGTGCGGCAGCAGGGCGGGCTTTAGGACCCGGGGCTG
CCGCGGGAGCTGCGGCACCTCGAGCAGTGCAGCGGTAGCGGCTGAGAGGA
GCGGTCCCCCGCCGAGACAAACGGGATCGCTGAATTAACCCCGTTCGAAC
CGGTGCCGCAGGCGGCTCCGGCGCTGCGCAGCTCTTGGGGGCTCCCCAGA
ACCCTGCTTGAGGCAGCAGGGGTTCCCCGGAGCTGGCACGGCCGGCGGAA
CGCGGGCCACGTGTTCAGAGTTTCATTCCAGACCGTGGAGAGCCCGCACT
CCCTTTTCTGGCGGGGTTTTTAAAACTCGGGTCGGAAAAGAGTCGTTGTT
CTCTGTGTAATTATTCCGTGAAGGTATAGGATATTGTGCAAATTGCTCTG
ATAACATCGAAATGGGCTCTCAATTATCAGCACAACAAAAGAGTATTATT
TCTCAGCTTAAAGAACTGATAAATTCAGAAGATGTAGCAATTAAACAGAA
AACAATAATACAATTTGTATCTTGGCTTTCTAAAGAAATTCCAAATTTTG
AACAACAAGATATAAATTCGGTTTTATTTTGGGATGAAATAGGAAATTTA
TTGATTTCTAAAATAGAAAAAGGTAATTCTGCTACAGCTTTGTTCCTCCC
TATATTTCTAAATATTCGCAAACAATTATTACAATTGGAAAATAAAGGAC
AGCTACAGATAAAAGCTTTGAAACCCCCCCATCTTCTCCAAATTCCCCTG
TCTCTGAAAAGGATCCAAATGCTGTAAATTCTGAGCAGTCTGTCAGGAAA
TCCTCTTTATATCCATCTCTTTCGAATTTACCTCAACAGAACTCTGATGA
TACTCCAAAAAGTAATCTTCCTTTGTCTTACCGTGAGGGGACCACATGGT
CCATGGCGGCAGGCATGCCCCAGCTTCTTCATCCCACAATCCTTTCTTCT
CCACCCCCTTCCCTGTCCCCTATCCTAATCCTACACCTATAGTTCACCTT
AGCCACCTCTTCCTGGCTCAGGTTACAAATAACAATCCTCCAGGCTACAG
AGGGGCCCCGGGGGACAGCCCAGAGGCTGAGGGAGGAGGAGGAGGAGGAG
GGGGAGGGGAAGCCTCGGCTGACAGCAGCGGGGAAATACAGTATGTACCT
AGCTCTGCAGTCCAGAACTTAGAGGGAGAGAATATACCATCTGCTGCTCC
TGTAATTTATGTGGGTAGAAAAAATGGAAGAAGGGTGTATAACCCTCTCT
CATATTAAGATAAAAAAGAAATTTGTAAAGTGCAAAGAGAATTTGGTAGA
AGCAGTGAGATTTTCAAGGGTATGCTGAGAGCAACTTTCACTTCAAATGA
AATGACACCTCATCATTTAAAAGATATTTTCAGGTGTTTGCTAACTCCCT
CAGAATATGATGTGTGGTTTAATATGTGGAAACGTTCTTTAGGGATTCTT
TTAACAGAGCTTCACCAAAGCACTGACAATTCCAAGGATTTGGAAGATAA
TGAATTAACAGTCGATCATTTAAGTGGTGAAGGGACTTGGCATTGCCCTG
AAAAACAAACTCGAGTATTATCCAAATTTGTTTTAGATAAAATTTGCAAT
GTGGCTGAAAAAAGTTTTAATCAGTTACCAACAGTTGACATAACTGGCAG
TTATGTTAATGTAAAACAATATGTGTCTGACACTTTCTTGCAGTTTGTGG
ATCATCTGCCTGCGCAGGTGGAAAGACAAGTGCATGATCCAGCAATCCAG
GCTGAATTGATAAAAGAGATGGCACAAAGAAAGGCCAATGAGGCCTGTCG
CAGAGTCATTCTAAGTCTTCCTATGTACCCTGAACCAACCCTAGCACAAA
TGATAGAAGCCTGTGCCAGTAAAGCAGAATTGTTCAGAGTACCTAAAAGG
AATCCAAGGCCAGCTCCATCCAAGCCTGCAGCAGCTGAAACACCACGAGA
AAGGAAGCAACCTGTGCCACCTAAACAGCTGCAGCATATCACCTGCTTCC
AGTGTAAAAAGCAAGGACATTTCGCTAGGGAATGCCCTCTTAACCAGAAA
CACAAGAAGTCCAACAAAAGAAAAAACTGAGTTTGCAGCGCGTGCCTGCT
CTTAACATCATAACGCGCAGAGATATAAATACTGCGGGGCACTACTGTGG
CAAAAGCCTCTCTCTTAAAAACAAAGCGGGAGGATGGGATAAAAAGTGTG
GGTATACCAAATAATTTAAATGTTAATTCTCCTGTTCACCAGGTCTGGCA
GCCTTGTGGTCGTTTCAGGCTGGAGACTACAAAAGGTTTTCATTTCAGGA
CTACTGATTGTACAATTATTACAGTGGATCTGTCAAGCAGCCTAGTAGAC
GTGACCGTATTGCACATGGAAATGGAGAGTGAGTATTTTGTTGTTGGAGA
CACAGCACACACACCATTAGAAATTGAAGTAGCTCCCATTGTTATGAAAG
GAAAAGTATCCTGCCTCATAATATTAGCACGCTGTCCTCAGCCACCATTC
TACCTGGGCAAGGGGCAGATATTAGCTCAGGCTATTCCCATTCCAGCAGA
AGTCACAGCAGATGGGAAAGCACCTGAGGCCTACGGGGCAGAAGCGGTGG
GTGAGGAAAAACCTTCTTTGGCATGCAACCTAACACATGGATCAGATCAC
CTCCATGTGGAAGGGGTGCTTGACAAAGGGGCAGATGTGATGATCATACC
CGAAAGGATATGGCCTTCACACTGGAAACTGCAACCTGTGGCTGGGAAAA
TTCAAGGTATAGGAGGAATTAAATTGGCTAAAATATCAAAAAACATGGTG
CAAATTGAGGGTCCAGATGGGAGATTGGCTAGTGTTCGTCCATTTTTAAT
AGATTACAAATGTCCCTTGTGGGGGAGAGACTCCATGTCACAGTGGGGAA
TTAAAATGATTATTCCAAAAACTCCATGGGATTTTTAGAACTGGCTACTG
TGGAGCGCCCTGCCCAGAAACTAACATGGCTAAGTGACACCCCAGTTTGG
GTAGCACAGTGGCCAATGAAAAAGGAAAAGTTGAAGGCGCTTGAAGAACT
TGTGGAGGAGCAATTAGCAAAAAACCATATTGAAGAAACCACAAGCGCTT
GGAATTCCCCCATCTTTGTAATAAAGAAACCGGGGAAGGACAAGTGGAGA
TTATTACATGACCTCAGAGAAAGAAACAAAGTAATTCAGGACATGGGGTC
TCCTCAACCTGGGATGCCATCCCCAACAATGTTACCCCGAGATTGGCAAT
TAGCTGTAATAGACATCAAAGATTGTTTTTTCCAAATCCCCCTACACCCT
GAAGATGCCCCAAGGTTTGCTTTCTCAGTTCCCTCCATAAATCGAGAAGC
ACCAATGAAGCGGTACCACTGGAAAGTGCTGCCACAGGGCATGAAGTGCA
GTCCTACCATCTGCCAGTGGTATGTAGCCTCATTGCTGTCCCCTGTGCGT
GCACAAAGAAGGGAAGCCATCATATTACATTATATCGATGATGTGCTTGT
GTGTGCTCCCAATAACCTGATACTCCAACACACACTTGACCTAGTGGTTA
AAGTTTTAACCTCTGCTGGATTTCAAGTACAGGAAGACAAAGTTCAGAGG
ATGCCACCTTGGAAGTACCTGGGCTTGGAAATTACTGCACGGACTATTGT
TCCACAGAAATTAGAAATTAATTGTAATCCCAAAACTTTGGCAGATGTCC
ATTCCCTGCGTGGGTCTTTAAATTGGGTAAGGCCCTGGTTAGGCCTCACT
AATGAGGACCTAAAACCTCTCTTTAATTTATTGAAAGGAGAAAGAGAGTT
GGTTTCTCCCAGGGAACTTACCCCAGAGGCAAAGATTGCAATTGAAAAGG
TACAAAAAGCGTTGGCAGAGAGGCAGGCTCACCGTTATCAACCTGAGCTG
CCTTTCAAATTCATTGTTTTGGGAAAACTGCCACACCTGCATGGTCTAAT
ATTCCAGTGGATCAAGGGGCAGGATGATTCACTCTTAATTATAGAGTGGG
TTTTCCTCTCCCATCAAAGATCCAAGACCATCACTCAGCCACAAGAGCTG
ATGGCTCAGCTGATTCAGAAGGCAAGGATGAGGCTGTGTGAGCTGGCTGG
TTGTGACTTTGCATGCATTTACCTGCCAATCAAACTTTCTGAGGAGGGAA
GAAACTCTCCTGAAAGGATGACCAAAGAGATGTTTGAGCACTTGCTCCAG
AGCAATGCCAGCCTCCAATTATCTCTAGACAGCTACAGTGGACAAATATC
AGTCCAGGGCCCAGCTCATAAGTTGTTCAATGAGGAATTCCACCTCATTC
CTTGAGAGAAGAGGAGTAAGAGACCACTCAAAGCGCTCACAGTGTTCACA
GATGCGTCAGGAGCCTCTCATAAGTCGGTGATGACTTGGAGAAACCCACA
GACTCAGCATTGGGAAGCTGATGTGGAGTTTGTGGAGGGCTCGCCCCAAA
TAGCCGAGCTGGCTGCAGTTGTGAGAGCCTTTAAGAAGTTCTCGGAGCCA
TTTAACTTGGTAACAGACTCAGCTTATGTTGCTGGGGTAGTCTCTAGAGC
GGAGCAGGCAGTGCTCAAACTTTTCAGTGTTAGGAATATCTAGGGAAATC
AAAACAGACAATGGTCCAGCATACACATCCAAGGTGTTCCTGGAATTTGT
CCAGCAGTGGGGAGTGGAACATAAAACTGGCATCCCCCACTCCCCCACAG
GCCAAGCTGTGATTGAGCGTGCACACCAGACGCTCAAACAGGTTCTAGCT
AGACAGAGCAGTTCAACTGTGTGGATGTCTCCACAGCAAAAGCTGTGCAA
AGCCCTATTCACTATAAATTTCTTGAATTGCTCATTTGAAAATATGAGTC
CTCCTGTGGTACGTCACTTTAACAGCAGTTAACAGTTCAAGTTGTCTCAG
CATCCACCAGTTTTGATCAGGGACCCAGAAACGTGGGAAACCAAAGGTCC
CTATGAGCTGGTAACCTGGGGAAGGGGTTATGCATGCATATCCACTCCTT
CAGGCCCTCGGTGGATTCCCCAGAAGTGGGTCAAACTGTTTGTTCCAAAG
AATCCAGCTCCAGCAGAAGGAGATGAGAAGCAAGTAACCACTGCTTCGAA
AAGAAGGCGCCACCAGAAAGAAGAGAAAAAAAGCTTTATAAAGGACTACA
TTCCGGCAGACAGAGACTCATAACATGTTTTAAAATGTTTGTTTTTCCTT
TTAGAGAAAACCTACCCTCCACTCAACCCAGTGATGAACCCTTCCCAAGT
TAACAACCTAATCGGATGAACTGTTCAGAGGCTGGGGGTTTTCTGGGTGG
TGGACCTCTATAGTTAAAACAATTCTGTTATTCTTTGTTATTCTTTTCCT
TGTAATAACGGCGTTCGGGATCCTACGATATTTAATTTTCAAGGCCATTA
ATGGTATCATTCCGTCTACCTCTGTAGTTAATCCCATAGAAATGAAAAAC
ATAAAACAATCTAATTCTTCCGCCAATTATCAATGGTGGACAAAATCATA
ATTCGAATCAAAATAAATAGAATATCCTTCCCTCACTTAAAAACAAAAAA
ACGGGGAGA
>oenMel1-37#LTR/ERVK	 
ATGGTGACCCCGACGTCGCCCTCCTGATCAACAAAGAAAACGGGGGAGGA
CGTGCCACGGCGGAGAAAGTAGGAGTTGGGTCCTGATCGCAGCCAGGACG
GTGCAAAAATCTGCCAGACAGACGGCACCCCCGAAGACCATAAAGNTGGT
TTTGGGCCATACGTGCCACCGGAGCCTGGAGAGCTGCAACAGCGCTGACG
ACAGAGATGGATAGGCAAGTGGCATATGAATTATTTACTCGTACTTTGCA
GCAGTGCAATGTTCAGGGAATTGATTTAAAAAAGGATTTACCAGGGTTAT
TAGCATGGGGGTATGCAAAGGGTTGTTTTGTTGTGCCGCAGACAGTACAT
GAATTGTCAGAATGGCGTAAACTNGGTGATAAACTATGGGAGGCTGTGNT
AGATGANGACAAGACGGCAAAGAAGCTGAGTAAAATATGGAGAATAGTGC
ATAATGCTTTGTTGCAGAAGGTAGTAGAGAAAAGGGCAGCTGGGCAGGCT
ATTGAAGCACATAAAAAGAATTTGTCTTACGGGCTTGAGGAAGGACAACC
ATTGGCCCCAGGGATAANATCTGTGCGAATTCCAATTGCTGGGACGGCAG
GGAATGGCAATGTTGACTCAGAGGACGACTCACCCACACCGTCTGCTCCT
TTACTTGAGAAGCAGGAGNTTGTGCAAAGTAAAGATGATAAAGAGCCACG
GCCCCCGTCTCAGACACAAGGCATGCAAAATCCAATCCCGGGTCCTGAAG
GGGACTCGTTGGAGAGGATGGCGCGGCAAAGACAGGAGGCATGGAAGNGC
TTGGCACAACAGTCGGTGATGGATGGGGATGGGAATGTAGTCCCTACCTC
TGGATTTATGGCATTCCCTGCGACATTTACGCCTTTATATGACCAGNAAG
GCAACCCAGCAGGGATGCAAGCAGATTTCCATCCTTTGGATTGGAAAATG
CTAGCGCAACTAAGACAGACAGTGAGCCAATTTGGATTTAAGAGCGAGCC
CGTAAGACAAATGTTGGATTACCTATTTGACACACAGGTCCTTTTGCCAA
ATGATTTAAGGGGTATTTCACGTTTGATTTTATCTGAACATCAGTTGATA
CTATTTGGGGCACATTGGCAAGCGTTAGTTCAAGAATCAGTGGCTACACA
GCGTCAGCAGGGTGACCCACTGCATGGAGTAACTATGGATGAATTGATGG
GGACAGGAAATTTTCTCAGGACTGAGGCACAGTTGTTGATGGGAGCAGAT
AAAGCCCGAGAGGCCATGAGATTGTTTCGCAATGCTTTAGATAGGGTTAA
GGAGCCTGGGGGTTTGCCTGCTTACATGGGAGTGAAACAAGGACGAGATG
AGACATTTGGTGCCTTTGTTGATAGAATAGCAGCTGCAATTAACAAGGCA
GGAGCACCAGAATGGATGAAAGTTCACTTAATAAGACAGTGTGTAATACA
AAATAGCNNTCCAAATATTCAGAGACTTATAGCCACTTTGCCAGGGAATT
GGGGAATAGAAGAGTTGCTGGAGCGAGCTTCTATGATACCAACAGGAAGT
CAGGCATTTTTAGCCGATGCTATAAAGGAATTGGGAGCAGGTTTACAAAA
ACAGGCAGAGGCTGCTCAGTCTCAAGTGTTAGCCGCCCTTGCTCCTCTCC
AGGCCTCCACGGTCACTAACAACAGTAACCCATCCGCCAAATGTTATCGA
TGCGGAAAAGGGGGTCATATCCGACGTGCNTGCCGAGCAGCAGGAGTTTG
GTGCCAGAANTGTCAATCTGACACACACAATACAACTGCCTGTCGCCGTA
AGTCGGGAAACCGCAAGCAGAGCGCGTCCGGCCGCGCTATGACACAAGTG
GCCGGAGGGAGAGTAACAGCGCCACCGCCTGTCTCCAACCAGCAACAGCA
GGGTCCCTCGGCTTGGACCTGGCAGCAGCAATAGATGTTACCCTGTATAC
CGATCGGCCAAGCAAAATACCAACTGGAGTTAAAGGTCCCATAATAATTA
ATGGACAGGCATTTGGAGCTTTGCTTTTGGGACGATCATCAGCATCTATA
TTGGGACTTTTTGTTTTACCTGGGGTAATTGATGCGGATTATACTGGGGA
GATACAAATTATGGCTTACACCCCTTACCCACCATTGAAAGTGGAGAAAG
GTCAACGCATAGCTCAGTTGCTACCACTACCGCAGTTGACTGCTGGACTA
ACTCCAAAAACAGAAATTCCTCGAAATTCTGATGGGTTTGGGTCAACGGG
ACTTACTTTGCTAACTTTGGATTTAAGGGATCGGCCAAGGAAAACCGTCA
AGATTACCTTCCAAGGGGATGAAATTTCCGTCTCAGCACTACTTGACACC
GGAGCGGACACAAGTATTGTTAGCCCCGAGATATGGCCAAATCGCTGGCC
TTCCTATGCATCTACACAGACAGTGACTGGAGTTGGAGGTTATACTTTGG
CCAAAAAATCGCCGACAGTAACGCTGCACATAGATGGACAACAACTCAAC
ATGGTTTTTTCCATTGTGCCGTTACCTCCTTCAGTTTGCTGTTTGATTGG
CCGTGATGTACTTTCCCAACTGGGTGTAGTGCTGACAAACGCGCACCCTT
TGGGGTAACTGCCATTGCTTGGACTTTCCCCCTTCCACTCACCTGGACAA
CCGAGGAACCAGTGATGGTTAAGCAATGGCCATTAAAAAGGGAAAGTCTT
GAACAAGCTCATCAGCTGGTAAAGGAACAGTTTCAACAAGGACATTTAAA
ACTATCTACAAGCCCCTGGAATACACCCATTTTTGTGATAAAGAAAAAAT
CAGGAAAATACAGACTTTTACATGACCTGAGAGCTGTAAACAACCAAATG
GAACCAATGGGAGCCCTACAGCCGGGACTTCCTAACCCAGCCATGATACC
AGAAAATTGGCCTATTTTGATTATTGATCTTAAGGACTGCTTTTTTACCA
TCGCCTTGCATCCAAATGACACAAAACGTTTTGCATTTACATTGCCAGCC
ATCAACAGAGGTGAGCCAGATAAAAGATTTGAATGGACAGTTTTGCCACA
GGGGATGCGTAATTCACCTACATTATGCCAACTATATGTAGATGCTGCTT
TACAACCACTGAGACAGAAAATGCCACGGACAGTAATTTACCATTATATG
GATGATATTCTGTTTTCACAAGACTGTGAATTTACAGATGAACAAGTAGG
GATCATTAAATCCACCTTGGCAGACTTTTCACTGGTTGTGGCACCAGAGA
AAATACAACGATCAAAACCTTGGAAATATCTTGGTTGGACTATAACTGAA
CAAAAGGTTAAGCCACAAAAATTACTANTGGATATAAGGATTTCAACCTT
GCATGAGGCCCAAAAACTTTTAGGAGACCTACAGTGGTTAAAGCCGATNA
CAGGCATTCCAAATACATTGTTGCAAGCCTTGCAACCGTTGTTAAAAGGA
ACAGATCCTTGCACTCCTGTTCACGTCACCCCGCAACAGGAAGAGACGCT
GCAGCAAATTGTGAAATGTATAACAGATGGATTTGTATCCCGNAAACAAC
CTGATTGCCCAATAAATTTTACCATCTGGCATGGTAATGGACACTTATTA
GGAGCACTTACTCAGCTAGAAAAGAAAACGGGGGAGCCAAGGGTATTAGA
ATGGATATCACCACCTTTACAAACAAGGAAAACAATAACCACAAAAATTG
AAAATTTGGCTATGCTACTTAGAAAAGGACGATTGCGCATTTTAGAAGTC
ACAGGACAAGAACCAGCAGTAATTTACCTGCCCATAGAGAAACCGACATT
GGACTGGTACNTGTTGAATTCTACAGAGTTTGCTGAGGCACTACTGGGAT
CTGGAGCACAGGTGGAAACTGGAGCCTTAGCACCTAAGGCACTGCAGTGG
ATTGGAGAATGGAGTTGGATTACCAAGACGCTGCGGGAAGAAACACCCAT
AGCTAATGCCACAACAGCCTTCACGGATGCCGGGAAAAAGTCTCGCCGAG
CGGCTATCGTGTGGAAAGAAAAAGCAGAATGGAAGCAACAGATTCTTGAA
GCAACACCTGAAGATAGCCTGCAGACATTGGAGCTATTAGCAGTGACATG
GGCCGTTACTCATTTAGATGGACCTTTGAATGTAGTGTCTGATTCTCTTT
ATGTGGTGGGAGTGGTATGTAGAATAGAGGATGCTAGTGTGAAAGAGGTT
AGCAACAGGAGATTGTATGAGCTGTTTTTACAGTTAAAGAGAGCCCTAAT
GGANAGAAAAGAGCCCTATGCAGTGATTCACATTCGAAGTCACAAATGGG
ATTTGGGTCTGGGAGAAGGAAATGCAAGAGCTGATAGATTGGTGATGCCG
GTTGAAAACTTGCCTTTGATTAGTAAAACAGTAATGGCTAGAGAGGCACA
TAATGCATATCATCATAATGCTAAAGGATTGGTGAGGCAGTTTGGTATTA
ACATTAGTGAGGCCAAGGCTATTGTTAGAGCATGCCCTATTTGTAGTCAC
CATAACGGGGGAGTAGGACTAGGATGTGGAGTGAACCCAAGAGGAATAAA
GATCAATGAAATATGGCAGATGGATATAACACACCTACAGAGTTTTGGAN
GATTGAAATATATCCATGTCACCATAGACACTTTTAGTGGGTTCATATGG
GCCACAGCACAGGCAGGAGAAAAAGCTATTCATGTTATCAGACACCTTTC
TAGCTGCTTTGCAGTCATGGGGGTTCCAGCTGAAATTAAAACAGACAATG
GTCCTGCCTATGTCAGTGGTAAAGTCAGAAAGTGGTTAGAATCCTGGGGA
ATAAAACATGTTACTGGAATACCACATTCTCCCACTGGACAAGCAATTAT
CGAGAGAGCCCATGGAACATTAAAGCGATATATACTCAAGCAAGAAGATC
AGGTTGATCCATATACAAAATTATCCAAGGCTCTTTACGTTATCAATCAT
TTGTGTGTTTTTGGGGAAAACAAGGATCCTGCAGCCATCAGACATCATAC
ATCATACAGCACAGGAGGTACCCAGCCAGAGACCTGGGTTCGATACAGAG
ACCCTAAAACAGGGATATGGCAGGAAGCAGCAAAAGTTTTGTTTTGGGGC
AGAGGTTATGTGTGTGTTTCTACTCCTTCAGGAACATTATGGGTGCCGGC
CAGATGGACTAAAGTGGTACTGCAGAAACCCGTGAATGATTCCAGAGTTG
GAACCGGACAGCAGACTTCGACGACTGAGGAATAGACTATTTTTTTCAAC
AGGAAATAGAGGAACTAGAGGTTTTGCTGGANANACCAATTTNTTGTGAT
TGGGAATTTGATCCTGATACCTTTTTGTGGGATTTAGATAAGTGTAAACG
ACAAGTGATTAGAGAGATTGTTAAAGAACATTTGGATTTGAGATCTGGCA
AATGCTGGAATTGTAAAGGAAAGNATTGCAAAGGANCANCTTTAATATTA
CTGTATTGTGGGAGGTGTGAAAGAGTATTAATACAGACTCAGTGGGGGTT
TTCACAACCATTGTGTATNANTTGCACTTGGAGAGNTCAAANGNGATCAT
GGCAAACCNCCATTAGGGAAGCAACGGNTGCCAGCAACACAAGNGAAGCC
TTGTTGTTAATAGAAAATAGAGCCAACCTATATAGGCTGCATATTCGGTG
GAGGTTGCAAAACGCCNTTGAGGACATAAGGTGCTGGAGGAAAAGCAAAN
TTTTAGGANTAGCTTGTGCAGGTGAGAAACAGNGTGGAGGTTCGCCCGAA
ATTAGAGAGAATTTGGCAGAAACGGATCCTGAACTGGCAAAACTTTTATT
TGGAATCAAAACCCTTGTTATAGAATAAGAAATGGAGGTATTAATACTTG
TTATTATTATTGGAGTAACAAATTCAATGGGAAATAAGTTGATAACTCAT
TTTGGTCCCCGAGAGAATGTTTGGGTAACCATAGCAAATCAAACAGGGCA
AACTTCAATGTGTTTAAGTGCGGGTAGTATTAACAGCCCCTTTAAAACGT
GTTTATTTGGAATACCAACTTGGCAACCCTCGGACTTTAATGGCTTTGTG
AATGATCCTTCCGTACTAAATGAAAAGCGAGTCATGGCAGAATTTAGTAG
ATACGCTTATGGTTTTTCTCGCGGTCAACTCGACGGAAGATGGCAGTGCC
GTATTATCTTAGCCCTTAATATTACACTTACTTCCCCACCTGAGGAAATT
GATATTGTAGGATGTAGTAACGCCAGCTTTGGAAACAGAACAGGTGGGTG
GCTATCCTTTGGGCCACGGCGTTTAAATCAAAAAGACAAAGATAGATATT
CGTGTGCTTTTTGTGCCATGTATTGTAAAATGCTTGCAGAATATGGTATT
ACGATTGGTAAATCAAAAGTGGGAAACAAATTTGTTAGCCCAAAAAGAAA
ACGGGGGAAG
>oenMel1-38#LTR/ERVK	 
TGTGGCATTTAAGGTGTTGCTTGGGGTGAAATCAGGAGGTTCTTTAGCTG
GGAATGCTTTTGTCTCCATAACT
>oenMel1-39#LINE/CR1	 
GAGGTCCCAGATGACTGGAAGNCGGCAAATGTGACACCCATTTACAAGAA
GGGCNGGAAGGAGGATCCGGGGAACTACAGGCCNGTCAGCCTGACCTCGG
TGCCTGGNAAGGTNATGGAGCAGATCATCCTGAGTGCCATCACACGGCAC
NTACAGGACGGCCAGGGNATCAGGCCCAGCCAGCATGGGTTTACGAAGGG
CAGGTCCTGCTTGACCAACCTGATCTCCTTCTATGACGAGGTGACCCGCC
TGGTGGATGAGGGAAAGGCTGTGGATGTTGTCTACCTGGACTTCAGCAAG
GCCTTTGACAC
>oenMel1-39#LTR/ERVK	 
CCCCTTTTCTTTATTAATTAAGAGGGCTTTTTAAAGGATATTAAAATTAG
ATGGTTGAGGTAAGTAAAAAGCACAAAATAAAACAATTTTTAAAATGCAA
GCTATATTTTTTTGAGTCTTTAGTGTAAAAAGGAATTTTTGAAGCATCTT
GAAACTGGTAGGAAGAAACTTGAAGTTTTTTCAGCATGGCTTGTTAGGAA
ACTGAGGCAGGAAAGGGATTTTTCAGCGTGAACTGGCACTTTGGTGGCTG
TTAGCGAAATGGGAGTGCTGTACCTGTTGAAACTCTAAAAAGAGATCATT
AATTTTGAAGAAAAAACAAAAGTTGTTACTTTAAGAATTTATTTTTTTTT
CTTTTTTTTCTTCCCCTCCCTCCACCCCAATCATCCCTCTCTTTGTATAA
AGGAATTTTGAGAAAACAAATTGGTGGTAGGGTGGCAAAGGTAGGGAAAA
GCATGGCTGTGGGAAAACTTTGGAGGGGAAAGGGGGTTATGAATTTGGGG
AAACATAAAAAAAGGGTAATTGGATTTGGGGAAATTTTGAAAAAACTTAT
TTGGTGGATGGATAAAGGGAAAAGAGGGAGGGAAATAGGAAGGCAAAAGG
GATTGGGGGAAGGCACTTATTTGCTTGGCAGGTTTTACAGATGAAGAATT
ATGGTTGCTGCTGTGATTTGAGGGCTGTTAGCTTTGGTTGCTGAAATTGG
CAGGGTTTGTGTCGCGGGCAGGCAGCTGCAAGGCTGAAAAGATGTGGGCA
GCACTGCGCTGGGGGAGCGGAACGCGCCAGCGGCGCTGGGTGCGCGGGGC
TGCTCGGCAGGGGGCGGCTCTCGGCGGCGCTGCTTCGGGGCTGTGTGGCG
GGCAGGTGGGCCGCTTCTCCTGCTCTCGGCGGCGCTGCTTCGGGGCTGTG
TGACGGGCAGGTGGGCCGCTTCTCCTGCTCTCGGCGGCGCTGCTTCGGGG
CTGTGTGGCGGGCAGGTGGGCCGCTTCTCCTGCTCTCGGCGGCGCTGCTT
CGGGGCTGTGTGGCGGGCAGGTGGGCCGCTTCTCCTGCTCTCGGCGGCGC
TGCTTCGGGGCTGTGTGACGGGCAGGTGGGCCGCTTCTCCTGCTCTCGGC
GGCGCTGCTTCGGGGCTGTGTGGCGGGCAGGTGGGCCGCTTCTCCTGCTC
TCGGCGGCGCAAACGAGAGGACAGAGCGGCGAGAGCGCTGGCCATGCGGC
GCGCTGCTGCAGCTGGGGGCGTGGGTTGGCTTTGGGACGGCCCGGGCGGC
GGCGGCCTCGGCGCGGGCGGCAGCAGGGGGGCCCCGGGCTCTCTGTAGCG
GCAGCAGCTCCGCACGGCTGCTCAGGGGATGGACTGTTCTCGGGGGCAGG
GTCTCCAACAGGTGGGGAGGGGCGCGGCTCGGAGAGGGGAGAGAAGGAGG
GGGAGTCCAGGCGCCCTTCCATGCGGTCATCGCCGTTTTGTGCAGTCTCG
GGGAACGGAAAACGTAAAGAAGAAAACTTTTCTTGCAAAAGTAGAGAGGC
TGTCTGGGGTTCAGTAGTTTCTGAACATTGATTAGAAAGCTGAACATTTA
GACTGATTGCAATAAACAAACGTAGAGTTTTTGCTATTGGAAAGTCTTCA
CTTTGCAATTTTTCCACAGCTTCATTTAAAAAGTTATTATTTAAAAATTA
TTTTTGTGAAACGTCAGGAAAATTGTCACACAGCCAACAAACTAAAAGCT
TCAAATCCCCCTTTAAAAACTGAAAATTGCTGCGACAAAGAATGTTTTTA
AATTGAAGGTAAATTTCCCGCTGTGAGCAGATGTATTTTACTGGCATTTT
TCACCCCAAGTTTGTTCCCAGCACGCGAAAGTAAAAAAGAGCAAAGAGTG
ATGCAAAGTTTGAAACTCACCACAGTAAAATTAAAAGACAGTCTCGTGCT
GGTTGATGTAAATGCAGCCACGAAGAAGTGTCCCAGTTCGGTGCGCCATT
>oenMel1-3#LINE/CR1	 
TTTGACACCGTCTCCCACAGCATNCTCCTGGAAAAGCTGGCNGCCCATGG
CTTGGACAGGNGCACTCTTCGCTGGGTTAAGAACTGGCTGGATGGCCGGG
CCCAGAGAGTGGTGGTGAACGGNGCTGCATCCAGCTGGCGGCCGGTCACC
AGTGGTGTCCCCCAGGGCTCAGTGCTGGGGCCAGTCCTGTTCAATATCTT
TATCGATGATCTGGATGAGGGNATCGAGTCCTTCATCAGTAAGTTTGCAG
ACGACACCAAGCTGGGAGCGTGTGTCGATCTGCTGGAGGGCAGGAGGGCT
CTGCAGAGGGACCTGGACAGGCTGGATCGATGGGCCGAGNCCAACGGNAT
GAGGTTCAACAAGGCCAAGTGCCGGGTCCTGCACTTNGGCCACAACAACC
CCNTGCAGCGCTACAGGCTGGGGACAGAGTGGCTGGAAAGTGCCCAGGCG
GAAAGGGACCTGGGGGTGCTGGTCGACAGCAGCTGAACATGAGCCAGCAG
TGTGCCCAGGTGGCCAAGAAGGCCAATGGCATCCTGGCCTGTATCAGNAA
TAGTGTGGCCAGCAGGAGCAGGGAGGTGATTGTCCCCCTGTACTCGGCAC
TGGTGAGGCCACACCTCGAGTGCTGTGTCCAGTTCTGGCCCCTCAGTTCA
GGAAGGACATTGCCAGGGAGGTGGTGGAGTCACCATCCCTGGAGGTGTTT
AAAAAAAGACTGGATGTGGCACTCGGTGCCATGGTTTAGTTG
>oenMel1-3#LTR/ERVL	 
TGGCCAGTCGCCCGACGCCTTGGAAAAGACTATAAAACACACCTTCAAAC
TGAAGACCCCCGAGATCTCCCCGGACGGCAACGGACATCTATTGGCTGGT
TCCACGAGGATCGTCTGCCCGTCTGGTAGCTATAATCCCAACCCCTTTTC
TCTCTCTCTGTCTCTGTCTCTCTCTCTCTCTCCGTCCCTCTATCGCATTT
TGTTGGCACTAAATAAAAGTGCATCTTTTGCAAAAGTAAACTGGTTTTGT
CCCCTGTTGTGTCTTTTGCGCTTTGAGATCCCTAAAAGAACCTATCAGGA
CTCCGCATGTGGTGTGGACCCTGACA
>oenMel1-40#LTR/ERVK	 
TGTGGGGGTCCAGAGTATTCCTCTGGCTTCCTTGGAAGGTTTATGGGGGT
GTGAATACCTCTTCCTCCTTCTCCTCCGTGTCATCCATGCTGGGTGACAC
GCTGGCACTTTTAGATTGGACAAGAACAGATCTGGACCATGTAACAAGAT
TGTATTGTATTGGGGGTCATTTGTAAATACCTAGTACGTAGTTTAGACTA
TAAAAGATAAGTCCTGCCTCTGCCAGGCAGATTCTGCCATGGACGTCTGG
CGGACAGACTGCTGTTCGCTGGACAAAGCATTCCTAAGATAAGCAACAAT
AAACAACCATGAAAACCTCTAAGAACAGCCTCCTGCAGTCTCTCATCGGC
GGGCATTGGAAAGAGCTGGGTTCCAAACCACCTGCATGTCCACCAGAGGT
GATCTCAGGTCTAAGGAGACACCTCAGGATGTGACA
>oenMel1-42#LTR/ERVL	 
TTTCAAACAAATCACAATCATAAAACAATCAAAATTAATACAAATCAATA
AAATAATTTTCAAACAATTTTTCAAACAAATCACAATCATATTAAAACAA
ATCAATAAAATAACTTTCAAATAATATTAAAGCAAATCAATATTGATTAT
AATATGTTTGTTTAACAGAGTTGATTAAAGCAATTGATTTTTCTAAACCA
TAAAAAAAAACTTAACATTATTTAAACTAATAGTACTAATCACAACAAAC
AACAAGCAATTCTTATCAGTTTGCTGTTAAAGGCCTAACTTTTACTGCTC
GTGTTATTTGTCTGGTGTCAATAACTTTAGGGGTATCTTTAGCAGATGGA
GTAGTGATCAGATTATGTGCTTCCATTGTTGATGCTAATTGTGTCAACCG
TTTTACTATTCTCCAATTCAGGATGTATAGAATGGCTGGCAAAACAAAAC
CGATCAAGACTAAAATCAAAAGCACAACAATGGGGTGACACACTTTGTTT
AGGATGCCGATAGCAGGATACAGATTCCCCGATACTGGAGGAGTTGGGGG
TTCTCTGTGCACTTTGTACCAGGGGAAGACCTGTGCCATTTCAGCCGCAC
CCAGCCTGTCAGTACCGTAAGGACTGAACAGTGTTGGAAAGCAAGGGAGG
TGGTATTGGGTTCTTCCCGCAATCTGCACACAGACCCAGGTAGATAATCA
ACTCCATTTCAGTTATCAGAGAAATTTTTGTAAAGGATCTCAACTGTGCA
AAAGATGGGACTTGTGTTTTTGTTGTATATGTGTTGTTAAGCTGCTTGTT
GTAGTTGAGGAGAGAACCTCCCAGGCAGTTTTTGATCCCCTAACCCAGGC
AGGGAAGAAAGGGGATTGTCCTCAGCTAAAAGCTGGGTGTTTTCTTGTTG
GACCCCTAACCCAGGCAGGGAAGAAAGGGGTTGTCCTCAGCTAAAGGCTG
GGTGTTTTGTTGTTTTGGACCCCTAACCCAGGAAGGGAAGAAAGGGGCTG
TCCTCAGCTAAAGGCTGGGTGTTTTGTTGTTTTGGACCCCTAACCCAGGC
AGGGAAGAAAGGGGATTGTCCTCATCTAAAGGCTGGGTGTTTGTTGTTTT
GTTGTTGACTACTTGGGATTGCGAAGAGACAAGCTGTTTTGTAACTAAGG
TAGTACCTCCCAAGTAGTGTGGTCTCTTCACCCGCTCCAGGGACAAGAAG
GGAAACACAGTTTAGCTGTGCATATTGTGCAATTTTTAAGTGTGCCTCCC
TAAGAGTGGTTTTAGTCCCTTCGTAAAGATGTCTGAAGAAGATAAAAATG
CTTTTTATGCTTTGCTAGCTAAGTATAAAGCCAGACCCTCCCAAGGGGGA
GAAGATTGGGCATACAATAACTGGTTTAATTTAGAAAATGTGATTGATAG
GATAAATTCTTTAGAGAATTAAACCAAATTTAAACTGGGCAAGAACAGTA
AAACCATACTTTGCACAGTTCTAGGTGCTTGTCTCTCAGCAGCTGTGCTA
GCTCGTTTCAGACGAGTGAGTGAAGAAAAGGCAGTTATAGACTCTTTGCA
AGGCTTGGTAGAAGCGTTGCAAAAACTATTAGAGCAGGAAACAAATCATG
TAGAAACTTTACAAAAACTATTAGACGAAGAAAGAAGTCGAAACTATTTG
TTGCAGCTCTCCCATGCCTCACAGCATGCAGATACACTTAAGAATACAGA
AGAAAAGGAAACATATCATATAAAGCAGATATACCCCCAAAAAGAATTGG
TACACATACAAAATTGTGGGGAAAATTGCTCCTCTAAATTGAGACCTCTC
GTTAAAACAGAATACAGGTACCTGAACGAAGAGGATTTTGACCCCCCACA
TAACCTCCAAAGAAATACCATACACTGCTACTGAGTTGGCCAAATTAAAG
GAAGAATACTCACATCTCCCCCAAGAATCTGAGACCGAGTATGTTTTTAG
AATTTCACTCACTGGAGGTGATCAAATTAGATTAAGTGAACAAGAAGCCA
GAGTATACTGGGGGCCTGGAGTATTTTTAACAATTGGAAACAATCGTGTT
TCATGGTCTCTGACACAGCGTGCAGCCTATTGGGCTGGGGGACTTAGACC
CCTAGAAAGAGGTGATCCTCTAGCCATAACTGGCACCCCAGACCAACTCT
TAGAAAACATTCATAAAGCTGCCTGTTTGCAAATGATACATGAACGAAAA
TTGAACCCTGGCTATGAGTCACCAATGCAATTGCCGGTAAAGCCTGAAAT
TATGACACCTTTAATTAGGGGTCTCCCTGAATCTCTTAAACCAACAGCAA
TTCTTATTCAAAAGACAATAGCATCTATAGCTCCTGTAGACAGACTTGAT
AGATTTCTTGGGTGACAACGTTCAAGCAGTCAAACAAGTTCTACTGAAAG
CCCTGGCTTTACGCCAACTGTGACTCCTGTCCAACCCTCAAGCACGGATA
CTGATCATAAAGTTTGGACTTTATGTGGGGGGAAGTCGCAGAGGAATTGA
TTAATTATAACAGAAAATATGGGCCAATCAAACTTCCAGAAGATAGGCTT
GACAAAACTAGAGGGGTCAGACATATTGCCTCCCCTAATGAAAAGCAAGA
AAGGGGAAAACCAGTCGACAAAAATCTTAATAGCCGACAGAAACTGTGGT
CCTTAGGACTTACAAGGGGAGTGCCACGAGAAGTAATGGACGGCTTGTCG
TCCGAAAAATTAGCTAAAATAATTTCCAACTGGCGCTGCCCCAAACCTGT
AGTACTAAATACATCCAACTTGCAACCCTGTGCACTCCCTTCACAAGCTT
TCAGCGGCAAACGAAAAAAACAAGCCTTAGGCAATAAACCAAAACTTTCC
CCTACACAGATACTAGACAATGAGGCATTGCACCCACAACTGGTGCCAGG
[truncated: 396,677 more chars]
